# Supplementary material for: Synthesis and biological evaluation of novel isoellipticine derivatives and salts
Source: Royal Society of Chemistry journal article supplement (doi:10.1039/c2ob26181b), 2012-01-01
Supplement: c2ob26181b.pdf [file c2ob26181b.pdf]

## Supplementary Information

### Synthesis and Biological Evaluation of Novel Isoellipticine Derivatives and Salts

Charlotte M. Miller,<sup>a</sup> Elaine C. O'Sullivan,<sup>a</sup> Ken J. Devine<sup>b</sup> and Florence O. McCarthy.<sup>a</sup>

<sup>a</sup>Department of Chemistry, Analytical and Biological Chemistry Research Facility, University College Cork, Western Road, Cork, Ireland. <sup>b</sup>School of Pharmacy, University College Cork, Western Road, Cork, Ireland.

#### Contents

|                                                   |    |
|---------------------------------------------------|----|
| 1. Experimental – Isoellipticinium salts          | 2  |
| 2. <sup>1</sup> H and <sup>13</sup> C NMR spectra | 9  |
| 3. HPLC                                           | 53 |
| 4. NCI 60-cell line screen: single-dose data      | 63 |
| 5. NCI 60- cell line screen: five-dose data       | 77 |
| 6. Topoisomerase II assay gels                    | 85 |

## 1. Experimental – Isoellipticinium salts

### 2-(3'-Cyanopropyl)isoellipticinium chloride **17**

5,11-Dimethyl-10*H*-pyrido[3,4-*b*]carbazole **5** (198 mg, 0.80 mmol) and 4-chlorobutryonitrile (0.091 mL, 0.96 mmol) in dimethylformamide (5 mL) were heated to 120 °C for 48 hours. The dark pink solution was cooled to 0 °C and excess cold ether added. The resulting dark pink precipitate was filtered and washed with cold ether to yield product as a red powder (222 mg, 79%). mp 236 – 240 °C;  $\nu_{\text{max}}/\text{cm}^{-1}$  (KBr): 3384 (NH), 3153 (CH, aromatic), 3091 (CH<sub>3</sub>), 2246 (CN, nitrile), 1634 (C=C, aromatic), 1619 (C=C, aromatic), 1417, 1321;  $\delta_{\text{H}}$  (300 MHz, DMSO-*d*<sub>6</sub>): 2.28 – 2.41 [2H, m, C(2')H<sub>2</sub>], 2.69 [2H, t, *J* 7.3, C(3')CH<sub>2</sub>], 2.91 [3H, s, C(11)CH<sub>3</sub>], 2.98 [3H, s, C(5)CH<sub>3</sub>], 4.80 [2H, t, *J* 7.0, C(1')H<sub>2</sub>], 7.18 – 7.25 [1H, m, C(7)H], 7.53 – 7.59 [2H, m, C(8)H, C(9)H], 8.25 [1H, d, *J* 8.1, C(6)H], 8.44 [1H, d, *J* 7.1, C(3)H], 8.57 [1H, d, *J* 7.1, C(4)H], 9.97 [1H, s, C(1)H], 12.13 (1H, s, NH);  $\delta_{\text{C}}$  (75.5 MHz; DMSO-*d*<sub>6</sub>): 12.6 [CH<sub>3</sub>, C(11)CH<sub>3</sub>], 13.6 (CH<sub>2</sub>), 14.6 [CH<sub>3</sub>, C(5)CH<sub>3</sub>], 26.4 (CH<sub>2</sub>), 58.6 [CH<sub>2</sub>, C(1')H<sub>2</sub>], 111.4 (CH, aromatic), 115.6 (C, aromatic C), 119.7 (C, aromatic C), 119.8 (CH, aromatic), 121.4 (C, CN), 122.3 (CH, aromatic), 123.6 (C, aromatic C), 124.8 (CH, aromatic), 126.1 (C, aromatic C), 128.0 (C, aromatic C), 128.5 (CH, aromatic), 129.5 (CH, aromatic), 129.9 (C, aromatic C), 139.7 (C, aromatic C), 143.7 (C, aromatic C), 146.2 (CH, aromatic); *m/z* (ESI<sup>+</sup>): 314 [(M<sup>+</sup>), 100%]; HRMS (ESI): Exact mass calculated for C<sub>21</sub>H<sub>20</sub>N<sub>3</sub><sup>+</sup>: 314.1657. Found: 314.1664

### 2-(4'-Cyanobutyl)isoellipticinium chloride **18**

This was synthesised following the procedure described for **17** from 5,11-dimethyl-10*H*-pyrido[3,4-*b*]carbazole **5** (204 mg, 0.827 mmol) and 5-chlorovaleronitrile (0.11 mL, 0.986 mmol) in dimethylformamide (5 mL). The product was isolated as a pink solid (265 mg, 88%). mp 225 – 228;  $\nu_{\text{max}}/\text{cm}^{-1}$  (KBr): 3370 (NH), 3147 (CH, aromatic), 3087 (CH<sub>3</sub>), 2868 (CH<sub>2</sub>), 2243 (CN, nitrile), 1635 (C=C, aromatic), 1620 (C=C, aromatic), 1498, 1418, 1321;  $\delta_{\text{H}}$  (300 MHz; DMSO-*d*<sub>6</sub>): 1.60 – 1.75 [2H, m, C(2')H or C(3')H], 2.10 – 2.22 [2H, m, C(2')H or C(3')H], 2.64 [2H, t, *J* 7.0, C(4')H<sub>2</sub>], 2.96 [3H, s, C(11)CH<sub>3</sub>], 3.04 [3H, s, C(5)CH<sub>3</sub>], 4.83 [2H, t, *J* 7.2, C(1')H<sub>2</sub>], 7.23 – 7.31 [1H, m, C(7)H], 7.58 – 7.64 [2H, m, C(8)H, C(9)H], 8.3 [1H, d, *J* 8.1, C(6)H], 8.49 [1H, d, *J* 7.1, C(3)H], 8.63 [1H, d, *J* 7.1, C(4)H], 10.01 [1H, s, C(1)H], 12.18 (1H, s, NH);  $\delta_{\text{C}}$  (75.5 MHz; DMSO-*d*<sub>6</sub>): 12.6 [CH<sub>3</sub>, C(11)CH<sub>3</sub>], 14.7 [CH<sub>3</sub>, C(5)CH<sub>3</sub>], 15.8 (CH<sub>2</sub>), 21.7 (CH<sub>2</sub>), 29.9 (CH<sub>2</sub>), 58.9 [CH<sub>2</sub>, C(1')H<sub>2</sub>], 111.4 (CH, aromatic), 115.5 (C, aromatic C), 119.8 (CH, aromatic), 120.4 (C, aromatic C), 121.4 (CN), 122.4 (CH, aromatic), 123.6 (C, aromatic C), 124.8 (CH, aromatic), 126.1 (C, aromatic C), 128.0 (C, aromatic C), 128.5 (CH, aromatic), 129.4 (CH, aromatic), 129.8 (C, aromatic C), 139.7 (C, aromatic C), 143.7 (C, aromatic C), 145.8 (CH, aromatic); *m/z* (ESI<sup>+</sup>): 328 [(M<sup>+</sup>), 100%]; HRMS (ESI): Exact mass calculated for C<sub>22</sub>H<sub>22</sub>N<sub>3</sub><sup>+</sup>: 328.1814. Found: 328.1811.

### 2-(5'-Cyanopentyl)isoellipticinium bromide **19**

To a stirred suspension of 5,11-dimethyl-10*H*-pyrido[3,4-*b*]carbazole **5** (194 mg, 0.788 mmol) in dimethylformamide (5 mL), was added 6-bromohexanenitrile (153 mg, 0.11 mL, 0.867 mmol). The reaction mixture was heated to 120 °C for 4 hours and subsequently stirred at room temperature overnight. The mixture was cooled to 0 °C and cold diethyl ether (3 mL) was added. The resulting precipitate was collected by vacuum filtration and washed with hexane (3 mL) and cold diethyl ether (5 mL) to give the product as a bright

orange solid (272 mg, 81.7%). mp: 274 – 275 °C;  $\nu_{\max}/\text{cm}^{-1}$ (KBr): 3434 (NH), 3137 (CH), 3098 (CH), 2971 (asymm. CH<sub>3</sub> stretch), 2927 (asymm. CH<sub>2</sub> stretch), 2861 (symm. CH<sub>2</sub> stretch), 2239 (CN nitrile), 1634 (C=C arom.), 1624 (C=C arom.), 1419, 1320, 1217;  $\delta_{\text{H}}$  (300 MHz, DMSO-*d*<sub>6</sub>): 1.42 – 1.52 [2H, m, C(3')H<sub>2</sub>], 1.62 – 1.72 [2H, m, C(4')H<sub>2</sub>], 2.04 – 2.14 [2H, m, C(2')H<sub>2</sub>], 2.55 [2H, t, *J* 7.0, C(5')H<sub>2</sub>], 3.05 [3H, s, C(11)CH<sub>3</sub>], 3.21 [3H, s, C(5)CH<sub>3</sub>], 4.81 [2H, t, *J* 7.4, C(1')H<sub>2</sub>], 7.36 [1H, overlapping ddd, *J* 8.1, 5.2, 3.0, C(7)H], 7.69 – 7.70 [2H, m, C(8)H, C(9)H], 8.48 [1H, d, *J* 8.1, C(6)H], 8.59 [1H, dd, *J* 7.2, 1.1, C(3)H], 8.81 [1H, d, *J* 7.1, C(4)H], 10.08 [1H, s, C(1)H], 12.00 [1H, s, N(10)H];  $\delta_{\text{C}}$  (75.5 MHz, DMSO-*d*<sub>6</sub>): 12.5 [CH<sub>3</sub>, C(11)CH<sub>3</sub>], 14.8 [CH<sub>3</sub>, C(5)CH<sub>3</sub>], 16.0 [CH<sub>2</sub>, C(5')H<sub>2</sub>], 24.2 [CH<sub>2</sub>, C(4')H<sub>2</sub>], 24.7 [CH<sub>2</sub>, C(3')H<sub>2</sub>], 30.1 [CH<sub>2</sub>, C(2')H<sub>2</sub>], 59.6 [CH<sub>2</sub>, C(1')H<sub>2</sub>], 111.4 [CH, C(8)H or C(9)H], 115.5 (C, aromatic C), 120.0 [CH, C(7)H], 120.6 (C, CN), 121.6 (C, aromatic C), 122.5 [CH, C(4)H], 123.8 (C, aromatic C), 125.0 [CH, C(6)H], 126.4 (C, aromatic C), 128.2 (C, aromatic C), 128.8 [CH, C(3)H], 129.7 [CH, C(8)H or C(9)H], 130.1 (C, aromatic C), 139.9 (C, aromatic C), 143.8 (C, aromatic C), 145.8 [CH, C(1)H]; *m/z* (ESI<sup>+</sup>): 342 [(M)<sup>+</sup> 100%]; HRMS (ESI<sup>+</sup>): Exact mass calculated for C<sub>23</sub>H<sub>24</sub>N<sub>3</sub><sup>+</sup> 342.1970. Found 342.1967. Anal. calculated for C<sub>23</sub>H<sub>24</sub>N<sub>3</sub>Br.(0.25 H<sub>2</sub>O): C, 64.72; H, 5.79; N, 9.84. Found: C, 64.87; H, 5.73; N, 10.00.

## 2-(5'-Carboxypentyl)isoellipticinium bromide **20**

This was synthesised following the procedure described for **19** from 5,11-dimethyl-10H-pyrido[3,4-*b*]carbazole **5** (211 mg, 0.857 mmol) and 6-bromohexanoic acid (184 mg, 0.943 mmol, 1.1 eq) in dimethylformamide (5 mL) to give the product as a bright orange solid (290 mg, 76.7%). mp: 302 – 304 °C;  $\nu_{\max}/\text{cm}^{-1}$  (KBr): 3419 (NH), 3147 (OH, broad), 3097 (CH), 3025 (CH), 2932 (asymm. CH<sub>2</sub> stretch), 2860 (symm. CH<sub>2</sub> stretch), 1721 (C=O), 1634 (C=C arom.), 1621 (C=C arom.), 1418, 1157 (C-O);  $\delta_{\text{H}}$  (300 MHz, DMSO-*d*<sub>6</sub>): 1.33 – 1.43 [2H, m, C(3')H<sub>2</sub>], 1.55 – 1.65 [2H, m, C(4')H<sub>2</sub>], 2.02 – 2.11 [2H, m, C(2')H<sub>2</sub>], 2.25 [2H, t, *J* 7.2, C(5')H<sub>2</sub>], 3.05 [3H, s, C(11)CH<sub>3</sub>], 3.22 [3H, s, C(5)CH<sub>3</sub>], 4.79 [2H, t, *J* 7.4, C(1')H<sub>2</sub>], 7.37 [1H, overlapping ddd, *J* 8.1, 5.0, 3.1, C(7)H], 7.69 – 7.71 [2H, m, C(8)H, C(9)H], 8.50 [1H, d, *J* 8.0, C(6)H], 8.58 [1H, dd, *J* 7.2, 1.2, C(3)H], 8.81 [1H, d, *J* 7.1, C(4)H], 10.08 [1H, s, C(1)H], 12.00 – 12.05 [2H, s & overlapping br s, N(10)H, COOH];  $\delta_{\text{C}}$  (75.5 MHz, DMSO-*d*<sub>6</sub>): 12.5 [CH<sub>3</sub>, C(11)CH<sub>3</sub>], 14.7 [CH<sub>3</sub>, C(5)CH<sub>3</sub>], 23.9 [CH<sub>2</sub>, C(4')H<sub>2</sub>], 25.2 [CH<sub>2</sub>, C(3')H<sub>2</sub>], 30.7 [CH<sub>2</sub>, C(2')H<sub>2</sub>], 33.4 [CH<sub>2</sub>, C(5')H<sub>2</sub>], 59.7 [CH<sub>2</sub>, C(1')H<sub>2</sub>], 111.3 [CH, C(8)H or C(9)H], 115.4 (C, aromatic C), 119.9 [CH, C(7)H], 121.5 (C, aromatic C), 122.3 [CH, C(4)H], 123.6 (C, aromatic C), 124.9 [CH, C(6)H], 126.2 (C, aromatic C), 128.1 (C, aromatic C), 128.7 [CH, C(3)H], 129.5 [CH, C(8)H or C(9)H], 129.8 (C, aromatic C), 139.7 (C, aromatic C), 143.6 (C, aromatic C), 145.6 [CH, C(1)H], 174.3 (C, COOH); *m/z* (ESI<sup>+</sup>): 361 [(M)<sup>+</sup> 100%]; HRMS (ESI<sup>+</sup>): Exact mass calculated for C<sub>23</sub>H<sub>25</sub>N<sub>2</sub>O<sub>2</sub><sup>+</sup> 361.1916. Found 361.1911. Anal. calculated for C<sub>23</sub>H<sub>25</sub>N<sub>2</sub>O<sub>2</sub>Br: C, 62.59; H, 5.71; N, 6.35. Found: C, 62.34; H, 5.72; N, 6.35.

## 2-(6'-Carboxamidohexyl)isoellipticinium bromide **21**

This was synthesised following the procedure described for **19** from 5,11-dimethyl-10H-pyrido[3,4-*b*]carbazole **5** (200 mg, 0.812 mmol) and 6-bromohexanamide (173 mg, 0.893 mmol, 1.1 eq) in dimethylformamide (5 mL) to give the amide as a bright orange solid (301 mg, 84.2%). mp: 284 – 285 °C;  $\nu_{\max}/\text{cm}^{-1}$  (KBr): 3294 (NH), 3150 (NH), 3097 (CH), 2943 (asymm. CH<sub>2</sub> stretch), 2856 (symm. CH<sub>2</sub> stretch), 1683 (C=O), 1622 (N-H bend), 1498 (C=C arom.) 1417 (C-N stretch, amide), 1321;  $\delta_{\text{H}}$  (300 MHz, DMSO-*d*<sub>6</sub>): 1.31 – 1.41 [2H, m, C(3')H<sub>2</sub>], 1.54 – 1.64 [2H, m, C(4')H<sub>2</sub>], 2.00 – 2.10 [4H, m, C(2')H<sub>2</sub>, C(5')H<sub>2</sub>], 3.02 [3H, s, C(11)CH<sub>3</sub>], 3.17 [3H, s, C(5)CH<sub>3</sub>], 4.79 [2H, t, *J* 7.4, C(1')H<sub>2</sub>], 6.71 (1H, br s, one of

CONH<sub>2</sub>), 7.26 (1H, br s, one of CONH<sub>2</sub>), 7.26 [1H, ddd, *J* 8.2, 5.7, 2.5, C(7)H], 7.66 – 7.68 [2H, m, C(8)H, C(9)H], 8.44 [1H, d, *J* 8.1, C(6)H], 8.56 [1H, dd, *J* 7.2, 1.2, C(3)H], 8.76 [1H, d, *J* 6.9, C(4)H], 10.04 [1H, s, C(1)H], 11.96 [1H, s, N(10)H];  $\delta_C$  (75.5 MHz, DMSO-*d*<sub>6</sub>): 12.4 [CH<sub>3</sub>, C(11)CH<sub>3</sub>], 14.8 [CH<sub>3</sub>, C(5)CH<sub>3</sub>], 24.4 [CH<sub>2</sub>, C(4')H<sub>2</sub>], 25.3 [CH<sub>2</sub>, C(3')H<sub>2</sub>], 30.8 [CH<sub>2</sub>, C(2')H<sub>2</sub>], 34.7 [CH<sub>2</sub>, C(5')H<sub>2</sub>], 59.8 [CH<sub>2</sub>, C(1')H<sub>2</sub>], 111.4 [CH, C(8)H or C(9)H], 115.5 (C, aromatic C), 120.0 [CH, C(7)H], 121.6 (C, aromatic C), 122.4 [CH, C(4)H], 123.7 (C, aromatic C), 125.0 [CH, C(6)H], 126.4 (C, aromatic C), 128.2 (C, aromatic C), 128.7 [CH, C(3)H], 129.6 [CH, C(8)H or C(9)H], 130.0 (C, aromatic C), 139.8 (C, aromatic C), 143.7 (C, aromatic C), 145.8 [CH, C(1)H], 174.0 (C, CONH<sub>2</sub>); *m/z* (ESI<sup>+</sup>): 360 [(M)<sup>+</sup> 100%]; HRMS (ESI<sup>+</sup>): Exact mass calculated for C<sub>23</sub>H<sub>26</sub>N<sub>3</sub>O<sup>+</sup> 360.2076. Found 360.2074. Anal. calculated for C<sub>23</sub>H<sub>26</sub>N<sub>3</sub>OBr(0.2 H<sub>2</sub>O): C, 62.22; H, 5.99; N, 9.46. Found: C, 62.30; H, 5.89; N, 9.40.

### ***N*<sup>2</sup>-(6'-Methylsulfonamido-6'-oxohexyl)isoellipticinium bromide 22**

This was synthesised following the procedure described for **19** from 5,11-dimethyl-10*H*-pyrido[3,4-*b*]carbazole **5** (212 mg, 0.861 mmol) and 6-bromo-*N*-(methylsulfonyl)hexanamide (258 mg, 0.947 mmol, 1.1 eq) in dimethylformamide (5 mL). The product was isolated as a bright orange solid (337 mg, 75.5%). mp: 285 - 287°C;  $\nu_{\max}/\text{cm}^{-1}$  (KBr): 3399 (NH), 3164 (NH), 3052 (CH), 2935 (asymm. CH<sub>2</sub> stretch), 2865 (symm. CH<sub>2</sub> stretch), 1705 (C=O), 1633 (C=C arom.), 1620 (C=C arom.), 1437, 1415 (C-N stretch, amide), 1336 (asymm. SO<sub>2</sub> stretch), 1122 (symm. SO<sub>2</sub> stretch);  $\delta_H$  (300 MHz, DMSO-*d*<sub>6</sub>): 1.33 – 1.43 [2H, m, C(3')H<sub>2</sub>], 1.58 – 1.68 [2H, m, C(4')H<sub>2</sub>], 2.00 – 2.10 [2H, m, C(2')H<sub>2</sub>], 2.33 [2H, t, *J* 7.2, C(5')H<sub>2</sub>], 2.96 [3H, s, C(11)CH<sub>3</sub>], 3.07 [3H, s, C(5)CH<sub>3</sub>], 3.21 (3H, s, SO<sub>2</sub>CH<sub>3</sub>), 4.78 [2H, t, *J* 7.4, C(1')H<sub>2</sub>], 7.29 [1H, overlapping ddd, *J* 8.1, 6.3, 1.9, C(7)H], 7.59 – 7.66 [2H, m, C(8)H, C(9)H], 8.32 [1H, d, *J* 8.1, C(6)H], 8.51 [1H, dd, *J* 7.1, 1.0, C(3)H], 8.66 [1H, d, *J* 7.1, C(4)H], 9.98 [1H, s, C(1)H], 11.66 (1H, br s, CONH), 11.87 [1H, s, N(10)H];  $\delta_C$  (75.5 MHz, DMSO-*d*<sub>6</sub>): 12.5 [CH<sub>3</sub>, C(11)CH<sub>3</sub>], 14.7 [CH<sub>3</sub>, C(5)CH<sub>3</sub>], 23.5 [CH<sub>2</sub>, C(4')H<sub>2</sub>], 25.0 [CH<sub>2</sub>, C(3')H<sub>2</sub>], 30.7 [CH<sub>2</sub>, C(2')H<sub>2</sub>], 35.1 [CH<sub>2</sub>, C(5')H<sub>2</sub>], 40.99 (CH<sub>3</sub>, SO<sub>2</sub>CH<sub>3</sub>), 59.7 [CH<sub>2</sub>, C(1')H<sub>2</sub>], 111.3 [CH, C(8)H or C(9)H], 115.4 (C, aromatic C), 119.9 [CH, C(7)H], 121.4 (C, aromatic C), 122.3 [CH, C(4)H], 123.6 (C, aromatic C), 124.8 [CH, C(6)H], 126.2 (C, aromatic C), 128.0 (C, aromatic C), 128.6 [CH, C(3)H], 129.5 [CH, C(8)H or C(9)H], 129.8 (C, aromatic C), 139.7 (C, aromatic C), 143.6 (C, aromatic C), 145.6 [CH, C(1)H], 172.5 (C, CONH<sub>2</sub>); *m/z* (ESI<sup>+</sup>): 438 [(M)<sup>+</sup> 100%]; HRMS (ESI<sup>+</sup>): Exact mass calculated for C<sub>24</sub>H<sub>28</sub>N<sub>3</sub>O<sub>3</sub>S<sup>+</sup> 438.1851. Found 438.1833. Anal. calculated for C<sub>24</sub>H<sub>28</sub>N<sub>3</sub>O<sub>3</sub>SBr: C, 55.60; H, 5.44; N, 8.10. Found: C, 55.65; H, 5.41; N, 8.10.

### **2-(5'-Carboxypentyl)-7-formylisoellipticinium bromide 23**

This was synthesised following the procedure described for **19** from 5,11-dimethyl-10*H*-pyrido[3,4-*b*]carbazole-7-carbaldehyde **6** (146 mg, 0.532 mmol) and 6-bromohexanoic acid (114 mg, 0.585 mmol) in dimethylformamide (5 mL). The product was isolated as a bright orange solid (123 mg, 49.3%). mp: 267 - 269°C;  $\nu_{\max}/\text{cm}^{-1}$  (KBr): 3348 (NH), 3109 (OH broad), 2944 (CH), 2862 (CH), 1716 (C=O acid), 1684 (C=O aldehyde), 1622 (C=C arom.), 1600 (C=C arom.), 1411, 1199;  $\delta_H$  (300 MHz, DMSO-*d*<sub>6</sub>): 1.38 – 1.46 [2H, m, C(3')H<sub>2</sub>], 1.58 – 1.67 [2H, m, C(4')H<sub>2</sub>], 2.02 – 2.12 [2H, m, C(2')H<sub>2</sub>], 2.28 [2H, t, *J* 7.2, C(5')H<sub>2</sub>], 2.93 [3H, s, C(11)CH<sub>3</sub>], 3.05 [3H, s, C(5)CH<sub>3</sub>], 4.78 [2H, t, *J* 7.5, C(1')H<sub>2</sub>], 7.56 [1H, d, *J* 8.5, C(9)H], 7.95 [1H, dd, *J* 8.5, 1.3, C(8)H], 8.57 [1H, dd, *J* 7.1, 0.6 C(3)H], 8.65 – 8.68 [2H, overlapping s and d, C(6)H, C(4)H respectively], 10.00 [1H, s, C(1)H], 10.03 [1H, s, C(7)CHO], 12.04



(1H, br s, COOH), 12.28 [1H, s, N(10)H];  $\delta_C$  (75.5 MHz, DMSO- $d_6$ ): 12.5 [CH<sub>3</sub>, C(11)CH<sub>3</sub>], 14.7 [CH<sub>3</sub>, C(5)CH<sub>3</sub>], 23.9 (CH<sub>2</sub>), 25.2 (CH<sub>2</sub>), 30.7 (CH<sub>2</sub>), 33.4 (CH<sub>2</sub>), 59.9 [CH<sub>2</sub>, C(1')H<sub>2</sub>], 111.6 (CH, aromatic CH), 116.5 (C, aromatic C), 121.2 (C, aromatic C), 122.5 (CH, aromatic CH), 122.6 (C, aromatic C), 124.0 (C, aromatic C), 126.9 (C, aromatic C), 128.7 (CH, aromatic CH), 128.8 (C, aromatic C), 129.1 (CH, aromatic CH), 129.3 (C, aromatic C), 129.4 (CH, aromatic CH), 139.9 (C, aromatic C), 146.0 (CH, aromatic CH), 147.0 (C, aromatic C), 174.3 (C, COOH), 191.8 (CH, CHO); m/z (ESI<sup>+</sup>): 389 [(M)<sup>+</sup> 100%]; HRMS (ESI<sup>+</sup>): Exact mass calculated for C<sub>24</sub>H<sub>25</sub>N<sub>2</sub>O<sub>3</sub><sup>+</sup> 389.1865. Found 389.1853.

## 2-(5'-Cyanopentyl)-7-formyloellipticinium bromide 24

This was synthesised following the procedure described for **19** from 5,11 dimethyl-10H-pyrido[3,4-*b*]carbazole-7-carbaldehyde **6** (149 mg, 0.543 mmol) and 6-bromohexanenitrile (105 mg, 0.597 mmol) in dimethylformamide (5 mL) to give the product as a bright orange solid (154 mg, 62.9%). mp: 300 - 302°C;  $\nu_{\max}/\text{cm}^{-1}$  (KBr): 3418 (NH), 3029 (CH), 2933 (CH), 2868 (CH), 2243 (CN), 1678 (C=O), 1626 (C=C arom.), 1606 (C=C arom.), 1412, 1202, 1113;  $\delta_H$  (300 MHz, DMSO- $d_6$ ): 1.45 – 1.55 [2H, m, C(3')H<sub>2</sub>], 1.65 – 1.75 [2H, m, C(4')H<sub>2</sub>], 2.05 – 2.15 [2H, m, C(2')H<sub>2</sub>], 2.58 [2H, t, *J* 7.0, C(5')H<sub>2</sub>], 2.90 [3H, s, C(11)CH<sub>3</sub>], 3.00 [3H, s, C(5)CH<sub>3</sub>], 4.79 [2H, t, *J* 7.5, C(1')H<sub>2</sub>], 7.52 [1H, d, *J* 8.5, C(9)H], 7.91 [1H, dd, *J* 8.5, 1.3, C(8)H], 8.56 [1H, dd, *J* 7.2, 0.9, C(3)H], 8.61 [1H, s, C(6)H], 8.63 [1H, d, *J* 7.2, C(4)H], 9.99 [1H, s, C(1)], 10.01 [1H, s, C(7)CHO], 12.22 [1H, s, N(10)H];  $\delta_C$  (150.9 MHz, DMSO- $d_6$ ): 12.3 [CH<sub>3</sub>, C(11)CH<sub>3</sub>], 14.5 [CH<sub>3</sub>, C(5)CH<sub>3</sub>], 16.0 (CH<sub>2</sub>), 24.1 (CH<sub>2</sub>), 24.7 (CH<sub>2</sub>), 30.1 (CH<sub>2</sub>), 59.8 [CH<sub>2</sub>, N(2)CH<sub>2</sub>], 111.3 (CH, aromatic CH), 116.2 (C, aromatic C), 120.7 (C, C≡N), 120.9 (C, aromatic C), 122.4 (CH, aromatic CH), 123.8 (C, aromatic C), 126.7 (C, aromatic C), 128.3 (CH, aromatic CH), 128.5 (C, aromatic C), 128.6 (C, aromatic C), 128.9 (CH, aromatic CH), 129.0 (C, aromatic C), 129.2 (CH, aromatic CH), 139.8 (C, aromatic C), 145.5 (CH, aromatic CH), 146.7 (C, aromatic C), 191.8 (CH, CHO); m/z (ESI<sup>+</sup>): 370 [(M)<sup>+</sup> 100%]; HRMS (ESI<sup>+</sup>): Exact mass calculated for C<sub>24</sub>H<sub>24</sub>N<sub>3</sub>O<sup>+</sup> 370.1919. Found 370.1917.

## 2-(6'-Carboxamidoethyl)-7-formyloellipticinium bromide 25

This was synthesised following the procedure described for **19** from 5,11 dimethyl-10H-pyrido[3,4-*b*]carbazole-7-carbaldehyde **6** (148 mg, 0.540 mmol) and 6-bromohexanamide (114 mg, 0.587 mmol) in dimethylformamide (5 mL). The product was isolated as a bright orange solid (151 mg, 59.7%). mp: >300 °C without melting;  $\nu_{\max}/\text{cm}^{-1}$  (KBr): 3105 (NH), 2929 (asymm. CH<sub>2</sub> stretch), 2860 (symm. CH<sub>2</sub> stretch), 1664 (broad, 2 × C=O) 1600 (C=C arom.), 1409 (C=C arom.), 1319, 1273, 1199, 1112;  $\delta_H$  (300 MHz, DMSO- $d_6$ ): 1.32 – 1.42 [2H, m, C(3')H<sub>2</sub>], 1.56 – 1.65 [2H, m, C(4')H<sub>2</sub>], 2.00 – 2.10 [2H, m, C(2')H], 2.11 [2H, t, *J* 7.2, C(5')H<sub>2</sub>], 2.88 [3H, s, C(11)CH<sub>3</sub>], 2.99 [3H, s, C(5)CH<sub>3</sub>], 4.75 [2H, t, *J* 7.4, C(1')H<sub>2</sub>], 6.73 (1H, br s, one of CONH<sub>2</sub>), 7.32 (1H, br s, one of CONH<sub>2</sub>), 7.52 [1H, d, *J* 8.5, C(9)H], 7.92 [1H, d, *J* 8.5, C(8)H], 8.52 [1H, d, *J* 7.1, C(3)H], 8.60 [1H, d, *J* 6.8, C(4)H], 8.61 [1H, s, C(6)H], 9.94 [1H, s, C(1)H], 9.98 [1H, s, C(7)CHO], 12.23 [1H, s, N(10)H];  $\delta_C$  (75.5 MHz, DMSO- $d_6$ ): 12.4 [CH<sub>3</sub>, C(11)CH<sub>3</sub>], 14.6 [CH<sub>3</sub>, C(5)CH<sub>3</sub>], 24.4 (CH<sub>2</sub>), 25.3 (CH<sub>2</sub>), 30.8 (CH<sub>2</sub>), 34.7 (CH<sub>2</sub>), 60.0 [CH<sub>2</sub>, C(1')H<sub>2</sub>], 111.5 (CH, aromatic CH), 116.4 (C, aromatic C), 121.1 (C, aromatic C), 122.5 (CH, aromatic CH), 124.0 (C, aromatic C), 126.8 (C, aromatic C), 128.71 (CH, aromatic CH), 128.73 (C, aromatic C), 129.1 (CH, aromatic CH), 129.2 (C, aromatic C), 129.4 (CH, aromatic CH), 130.4 (C, aromatic C), 139.8 (C, aromatic C), 145.8 (CH, aromatic CH), 146.9 (C, aromatic C), 174.4 (C, CONH<sub>2</sub>), 191.8 (CH, CHO); m/z (ESI<sup>+</sup>): 388 [(M)<sup>+</sup> 100%]; HRMS (ESI<sup>+</sup>): Exact mass calculated for C<sub>24</sub>H<sub>26</sub>N<sub>3</sub>O<sub>2</sub><sup>+</sup> 388.2025. Found 388.2021.

### 7-Formyl-*N*'-(6'-methylsulfonamido-6'-oxohexyl) isoellipticinium bromide 26

This was synthesised following the procedure described for **19** from 5,11 dimethyl-10*H*-pyrido[3,4-*b*]carbazole-7-carbaldehyde **6** (103 mg, 0.375 mmol) and 6-bromo-*N*-(methylsulfonyl) hexanamide (112 mg, 0.412 mmol) in dimethylformamide (5 mL) to give the product as a bright orange solid (110 mg, 53.7%). mp: 270 – 271 °C;  $\nu_{\text{max}}/\text{cm}^{-1}$  (KBr): 3108 (NH), 3000 (CH), 2861 (CH), 1704 (C=O amide), 1683 (C=O aldehyde), 1622 (C=C arom.), 1604 (C=C arom.), 1411, 1321 (asymm. SO<sub>2</sub> stretch), 1157 (symm. SO<sub>2</sub> stretch);  $\delta_{\text{H}}$  (300 MHz, DMSO-*d*<sub>6</sub>): 1.28 – 1.38 [2H, m, C(3')H<sub>2</sub>], 1.53 – 1.63 [2H, m, C(4')H<sub>2</sub>], 1.96 – 2.06 [2H, m, C(2')H<sub>2</sub>], 2.27 [2H, t, *J* 7.2, C(5')H<sub>2</sub>], 2.90 [3H, s, C(11)CH<sub>3</sub>], 3.02 [3H, s, C(5)CH<sub>3</sub>], 3.15 (3H, s, SO<sub>2</sub>CH<sub>3</sub>), 4.73 [2H, t, *J* 7.2, C(1')H<sub>2</sub>], 7.54 [1H, d, *J* 8.5, C(9)H], 7.93 [1H, dd, *J* 8.7, 1.2, C(8)H], 8.52 [1H, dd, *J* 7.0, 0.7, C(3)H], 8.64 [1H, d, *J* 7.2, C(4)H], 8.67 [1H, d, *J* 0.6, C(6)H], 9.97 – 9.98 [2H, s, C(1)H, C(7)CHO], 11.61 (1H, br s, CONH<sub>2</sub>SO<sub>2</sub>), 12.26 [1H, s, N(10)H];  $\delta_{\text{C}}$  (75.5 MHz, DMSO-*d*<sub>6</sub>): 12.5 [CH<sub>3</sub>, C(11)CH<sub>3</sub>], 14.7 [CH<sub>3</sub>, C(5)CH<sub>3</sub>], 23.5 (CH<sub>2</sub>), 25.0 (CH<sub>2</sub>), 30.7 (CH<sub>2</sub>), 35.1 (CH<sub>2</sub>), 41.0 (CH<sub>3</sub>, SO<sub>2</sub>CH<sub>3</sub>), 59.8 [CH<sub>2</sub>, C(1')H<sub>2</sub>], 111.7 (CH, aromatic CH), 116.5 (C, aromatic C), 121.3 (C, aromatic C), 122.6 (CH, aromatic CH), 124.1 (C, aromatic C), 127.0 (C, aromatic C), 128.8 (CH, aromatic CH), 128.9 (C, aromatic C), 129.2 (CH, aromatic CH), 129.3 (C, aromatic C), 129.5 (CH, aromatic CH), 129.6 (C, aromatic C), 140.0 (C, aromatic C), 146.1 (CH, aromatic CH), 147.1 (C, aromatic C), 172.5 (C, CONH), 191.8 (CH, CHO); *m/z* (ESI<sup>+</sup>): 466 [(M)<sup>+</sup> 100%]; HRMS (ESI<sup>+</sup>): Exact mass calculated for C<sub>25</sub>H<sub>28</sub>N<sub>3</sub>O<sub>4</sub>S<sup>+</sup> 466.1801. Found 466.1787.

### 2-(5'-Carboxypentyl)-7-hydroxyisoellipticinium bromide 27

A stirred suspension of 5,11-dimethyl-10*H*-pyrido[3,4-*b*]carbazol-7-ol **7** (85 mg, 0.324 mmol) in dimethylformamide (5 mL) was treated with 6-bromohexanoic acid (69 mg, 0.354 mmol) and heated to 120 °C for 4 hours followed by stirring at room temperature overnight. The mixture was cooled to 0 °C and cold diethyl ether (3 mL) was added. The resulting precipitate was collected by vacuum filtration under nitrogen as the product was highly hygroscopic. The solid was quickly washed with hexane (3 mL) and cold diethyl ether (5 mL) to give the product as a red solid which was dried at 0.1 mmHg for 7 days (47 mg, 31.7%). mp: 291 – 293 °C;  $\nu_{\text{max}}/\text{cm}^{-1}$  (KBr): 3166 (OH), 3050 (NH), 2927 (asymm. CH<sub>2</sub> stretch) 2860 (symm. CH<sub>2</sub> stretch), 1719 (C=O), 1635 (C=C arom.), 1492 (C=C arom.), 1413, 1380, 1220 (C-O), 1152;  $\delta_{\text{H}}$  (300 MHz, DMSO-*d*<sub>6</sub>): 1.32 – 1.42 [2H, m, C(3')H<sub>2</sub>], 1.55 – 1.64 [2H, m, C(4')H<sub>2</sub>], 2.01 – 2.09 [2H, m, C(2')H<sub>2</sub>], 2.25 [2H, t, *J* 7.2, C(5')H<sub>2</sub>], 2.99 [3H, s, C(11)CH<sub>3</sub>], 3.13 [3H, s, C(5)CH<sub>3</sub>], 4.77 [2H, t, *J* 7.2, C(1')H<sub>2</sub>], 7.21 [1H, dd, *J* 8.7, 2.3, C(8)H], 7.51 [1H, d, *J* 8.8, C(9)H], 7.78 [1H, d, *J* 1.5, C(6)H], 8.51 [1H, d, *J* 7.2, C(3)H], 8.72 [1H, d, *J* 7.0, C(4)H], 9.34 [1H, s, C(7)OH], 10.00 [1H, s, C(1)H], 11.68 [1H, s, N(10)H], 12.02 (1H, br s, COOH);  $\delta_{\text{C}}$  (75.5 MHz, DMSO-*d*<sub>6</sub>): 12.3 [CH<sub>3</sub>, C(11)CH<sub>3</sub>], 14.6 [CH<sub>3</sub>, C(5)CH<sub>3</sub>], 23.9 (CH<sub>2</sub>), 25.1 (CH<sub>2</sub>), 30.6 (CH<sub>2</sub>), 33.4 (CH<sub>2</sub>), 59.7 [CH<sub>2</sub>, C(1')H<sub>2</sub>], 109.4 (CH, aromatic CH), 111.9 (CH, aromatic CH), 115.3 (C, aromatic C), 119.2 (CH, aromatic CH), 122.2 (C, aromatic C), 122.4 (CH, aromatic CH), 123.5 (C, aromatic C), 126.2 (C, aromatic C), 127.5 (C, aromatic C), 128.3 (CH, aromatic CH), 129.9 (C, aromatic C), 137.6 (C, aromatic C), 140.4 (C, aromatic C), 145.7 (CH, aromatic CH), 151.3 (C, aromatic C), 174.3 (C, COOH); *m/z* (ESI<sup>+</sup>): 377 [(M)<sup>+</sup> 100%]; HRMS (ESI<sup>+</sup>): Exact mass calculated for C<sub>23</sub>H<sub>25</sub>N<sub>2</sub>O<sub>3</sub><sup>+</sup> 377.1865. Found 377.1859.

### 2-(5'-Cyanopentyl)-7-hydroxyisoellipticinium bromide 28

This was synthesised following the procedure described for **27** from 5,11-dimethyl-10*H*-

pyrido[3,4-*b*]carbazol-7-ol **7** (79 mg, 0.301 mmol) and 6-bromohexanenitrile (0.04 mL, 0.331 mmol) in dimethylformamide (5 mL) to give the product as a red solid (41 mg, 31.1%). mp: 245 – 248 °C;  $\nu_{\max}/\text{cm}^{-1}$  (KBr): 3169 (broad, OH & NH), 2932 (asymm. CH<sub>2</sub> stretch), 2861 (symm. CH<sub>2</sub> stretch), 2242 (CN), 1633 (C=C arom.), 1492 (C=C arom.), 1468, 1413, 1221 (C-O), 1147;  $\delta_{\text{H}}$  (400 MHz, DMSO-*d*<sub>6</sub>): 1.41 – 1.48 [2H, m, C(3')H<sub>2</sub>], 1.62 – 1.69 [2H, m, C(4')H<sub>2</sub>], 2.03 – 2.11 [2H, m, C(2')H<sub>2</sub>], 2.54 [2H, t, *J* 7.0, C(5')H<sub>2</sub>], 3.03 [3H, s, C(11)CH<sub>3</sub>], 3.16 [3H, s, C(5)CH<sub>3</sub>], 4.79 [2H, t, *J* 7.6, C(1')H<sub>2</sub>], 7.22 [1H, dd, *J* 8.8, 2.2, C(8)H], 7.52 [1H, d, *J* 8.7, C(9)H], 7.81 [1H, d, *J* 2.2, C(6)H], 8.54 [1H, d, *J* 7.1, C(3)H], 8.77 [1H, d, *J* 7.0, C(4)H], 9.37 [1H, s, C(7)OH], 10.04 [1H, s, C(1)H], 11.67 [1H, s, N(10)H];  $\delta_{\text{C}}$  (75.5 MHz, DMSO-*d*<sub>6</sub>): 12.4 [CH<sub>3</sub>, C(11)CH<sub>3</sub>], 14.6 [CH<sub>3</sub>, C(5)CH<sub>3</sub>], 16.0 (CH<sub>2</sub>), 24.2 (CH<sub>2</sub>), 24.7 (CH<sub>2</sub>), 30.1 (CH<sub>2</sub>), 59.5 [CH<sub>2</sub>, C(1')H<sub>2</sub>], 109.4 (CH, aromatic CH), 111.9 (CH, aromatic CH), 115.3 (C, aromatic C), 119.2 (CH, aromatic CH), 120.6 (C, C≡N), 122.2 (C, aromatic C), 122.4 (CH, aromatic CH), 123.5 (C, aromatic C), 126.2 (C, aromatic C), 127.5 (C, aromatic C), 128.3 (CH, aromatic CH), 130.0 (C, aromatic C), 137.6 (C, aromatic C), 140.4 (C, aromatic C), 145.7 (CH, aromatic CH), 151.3 (C, aromatic C); *m/z* (ESI<sup>+</sup>): 358 [(M)<sup>+</sup> 100%]; HRMS (ESI<sup>+</sup>): Exact mass calculated for C<sub>23</sub>H<sub>24</sub>N<sub>3</sub>O<sup>+</sup> 358.1919. Found 358.1929.

## 2-(6'-Carboxamidohexyl)-7-hydroxyisoellipticinium bromide **29**

This was synthesised following the procedure described for **27** from 5,11-dimethyl-10H-pyrido[3,4-*b*]carbazol-7-ol **7** (233 mg, 0.888 mmol) and 6-bromohexanamide (190 mg, 0.979 mmol) in dimethylformamide (5 mL) to give the product as a red solid (186 mg, 45.9%). mp: 278 – 279 °C;  $\nu_{\max}/\text{cm}^{-1}$  (KBr): 3177 (broad, NH & OH), 2928 (asymm. CH<sub>2</sub> stretch), 2858 (symm. CH<sub>2</sub> stretch), 1654 (C=O), 1635 (C=C arom.), 1493 (C=C arom.), 1466, 1413, 1381, 1218 (C-O), 1151;  $\delta_{\text{H}}$  (400 MHz, DMSO-*d*<sub>6</sub>): 1.30 – 1.37 [2H, m, C(3')H<sub>2</sub>], 1.54 – 1.61 [2H, m, C(4')H<sub>2</sub>], 1.99 – 2.09 (4H, m, C(2')H<sub>2</sub>, C(5')CH<sub>2</sub>), 2.95 [3H, s, C(11)CH<sub>3</sub>], 3.08 [3H, s, C(5)CH<sub>3</sub>], 4.75 [2H, t, *J* 7.1, C(1')H<sub>2</sub>], 6.73 (1H, br s, one of CONH<sub>2</sub>), 7.18 [1H, dd, *J* 8.7, 2.2, C(8)H], 7.28 (1H, br s, one of CONH<sub>2</sub>), 7.47 [1H, d, *J* 8.6, C(9)H], 7.72 [1H, d, *J* 1.8, C(6)H], 8.49 [1H, d, *J* 7.1, C(3)H], 8.68 [1H, d, *J* 7.1, C(4)H], 9.35 [1H, s, C(7)OH], 9.96 [1H, s, C(1)H], 11.66 [1H, s, N(10)H];  $\delta_{\text{C}}$  (75.5 MHz, DMSO-*d*<sub>6</sub>): 12.4 [CH<sub>3</sub>, C(11)CH<sub>3</sub>], 14.5 [CH<sub>3</sub>, C(5)CH<sub>3</sub>], 24.4 (CH<sub>2</sub>), 25.3 (CH<sub>2</sub>), 30.7 (CH<sub>2</sub>), 34.8 (CH<sub>2</sub>), 59.7 [CH<sub>2</sub>, C(1')H<sub>2</sub>], 109.3 (CH, aromatic CH), 111.9 (CH, aromatic CH), 115.3 (C, aromatic C), 119.1 (CH, aromatic CH), 122.1 (C, aromatic C), 122.3 (CH, aromatic CH), 123.4 (C, aromatic C), 126.1 (C, aromatic C), 127.4 (C, aromatic C), 128.3 (CH, aromatic CH), 129.8 (C, aromatic C), 137.6 (C, aromatic C), 140.3 (C, aromatic C), 145.6 (CH, aromatic CH), 151.2 (C, aromatic C), 174.1 (C, CONH<sub>2</sub>); *m/z* (ESI<sup>+</sup>): 376 [(M)<sup>+</sup> 100%]; HRMS (ESI<sup>+</sup>): Exact mass calculated for C<sub>23</sub>H<sub>26</sub>N<sub>3</sub>O<sub>2</sub><sup>+</sup> 376.2025. Found 376.2018.

## 7-Hydroxy-*N*<sup>2</sup>-(6'-methylsulfonamido-6-oxohexyl) isoellipticinium bromide **30**

This was synthesised following the procedure described for **27** from 5,11-dimethyl-10H-pyrido[3,4-*b*]carbazol-7-ol **7** (137 mg, 0.522 mmol) and 6-bromo-*N*-(methylsulfonyl)hexanamide (157 mg, 0.577 mmol) in dimethylformamide (5 mL) to give the product as a red solid (145 mg, 52.1%). mp: 238 – 240 °C;  $\nu_{\max}/\text{cm}^{-1}$  (KBr): 3177 (broad, OH & NH), 2931 (asymm. CH<sub>2</sub> stretch), 2862 (symm. CH<sub>2</sub> stretch), 1708 (C=O), 1651 (C=C arom.), 1593 (C=C arom.), 1493, 1439, 1415, 1382, 1325 (asymm. SO<sub>2</sub> stretch), 1222 (C-O), 1156, 1113 (symm. SO<sub>2</sub> stretch);  $\delta_{\text{H}}$  (400 MHz, DMSO-*d*<sub>6</sub>): 1.31 – 1.39 [2H, m, C(3')H<sub>2</sub>], 1.58 – 1.65 [2H, m, C(4')H<sub>2</sub>], 2.01 – 2.09 [2H, m, C(2')H<sub>2</sub>], 2.31 [2H, t, *J* 7.2, C(5')H<sub>2</sub>], 3.01 [3H, s,

C(11)CH<sub>3</sub>], 3.16 [3H, s, C(5)CH<sub>3</sub>], 3.21 (3H, s, SO<sub>2</sub>CH<sub>3</sub>), 4.78 [2H, t, *J* 7.4, C(1')H<sub>2</sub>], 7.23 [1H, dd, *J* 8.7, 2.2, C(8)H], 7.53 [1H, d, *J* 8.7, C(9)H], 7.82 [1H, d, *J* 2.1, C(6)H], 8.53 [1H, dd, *J* 7.3, 0.4, C(3)H], 8.77 [1H, d, *J* 7.1, C(4)H], 9.38 [1H, s, C(7)OH], 10.04 [1H, s, C(1)H], 11.69 (1H, br s, CONH<sub>2</sub>SO<sub>2</sub>), 11.73 [1H, s, N(10)H]; δ<sub>C</sub> (75.5 MHz, DMSO-*d*<sub>6</sub>): 12.4 [CH<sub>3</sub>, C(11)CH<sub>3</sub>], 14.6 [CH<sub>3</sub>, C(5)CH<sub>3</sub>], 23.5 (CH<sub>2</sub>), 25.0 (CH<sub>2</sub>), 30.6 (CH<sub>2</sub>), 35.1 (CH<sub>2</sub>), 41.0 (CH<sub>3</sub>, SO<sub>2</sub>CH<sub>3</sub>) 59.6 [CH<sub>2</sub>, C(1')H<sub>2</sub>], 109.5 (CH, aromatic CH), 112.0 (CH, aromatic CH), 115.4 (C, aromatic C), 119.2 (CH, aromatic CH), 122.2 (C, aromatic C), 122.4 (CH, aromatic CH), 123.5 (C, aromatic C), 126.3 (C, aromatic C), 127.5 (C, aromatic C), 128.3 (CH, aromatic CH), 130.0 (C, aromatic C), 137.7 (C, aromatic C), 140.4 (C, aromatic C), 145.8 (CH, aromatic CH), 151.3 (C, aromatic C), 172.4 (C, CONH); *m/z* (ESI<sup>+</sup>): 454 [(M)<sup>+</sup> 100%]; HRMS (ESI<sup>+</sup>): Exact mass calculated for C<sub>24</sub>H<sub>29</sub>N<sub>3</sub>O<sub>4</sub>S<sup>+</sup> 454.1801. Found 454.1783.

*Note: Despite thorough drying at 0.1 mmHg (min. 48 h, max. 7 days), several of the 7-formyl and 7-hydroxy isoellipticinium salts contain traces of dimethylformamide. DMF signals in <sup>1</sup>H & <sup>13</sup>C NMR spectra: <sup>1</sup>H: 2.73 (s), 2.89 (s), 7.95 (s); <sup>13</sup>C: 30.7, 35.7, 162.3 ppm.*

5,11-Dimethyl-10*H*-pyrido[3,4-*b*]carbazole-7-carbaldehyde **6** (<sup>1</sup>H NMR spectrum in DMSO-*d*<sub>6</sub> at 600 MHz)

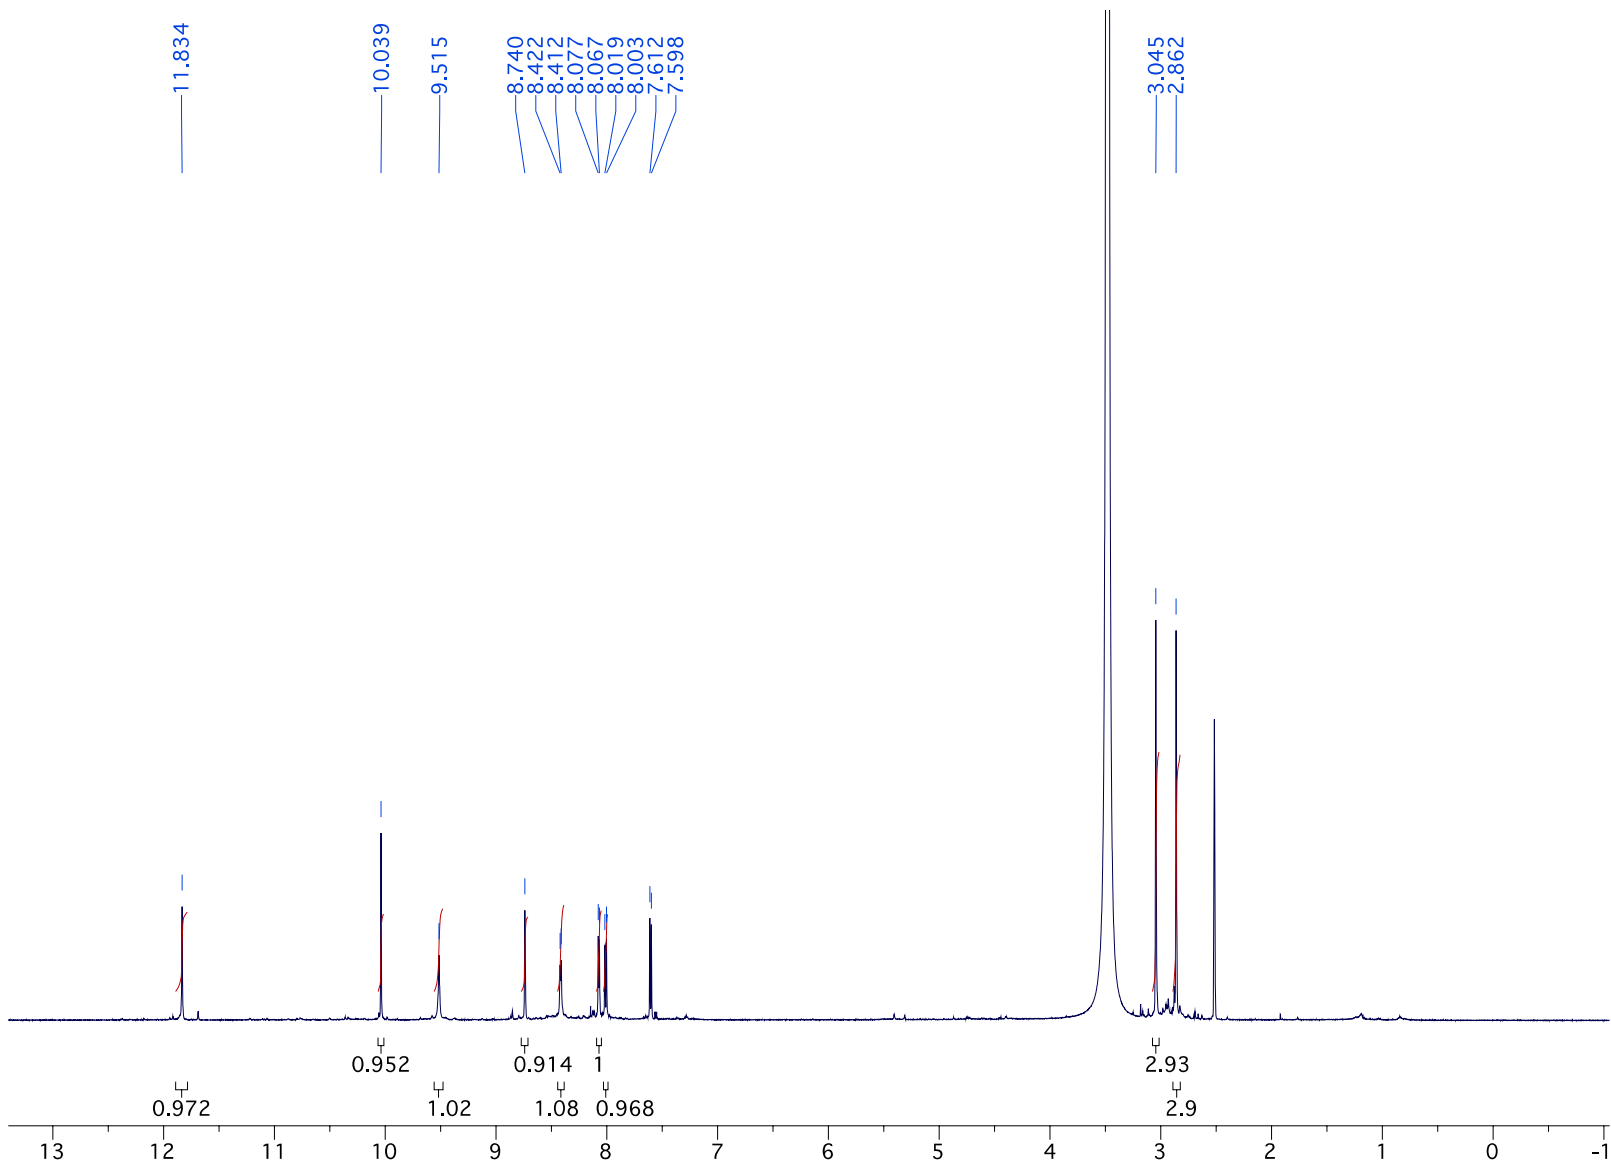

5,11-Dimethyl-10*H*-pyrido[3,4-*b*]carbazole-7-carbaldehyde **6** ( $^{13}\text{C}$  NMR spectrum in DMSO-*d*<sub>6</sub> at 150.9 MHz)

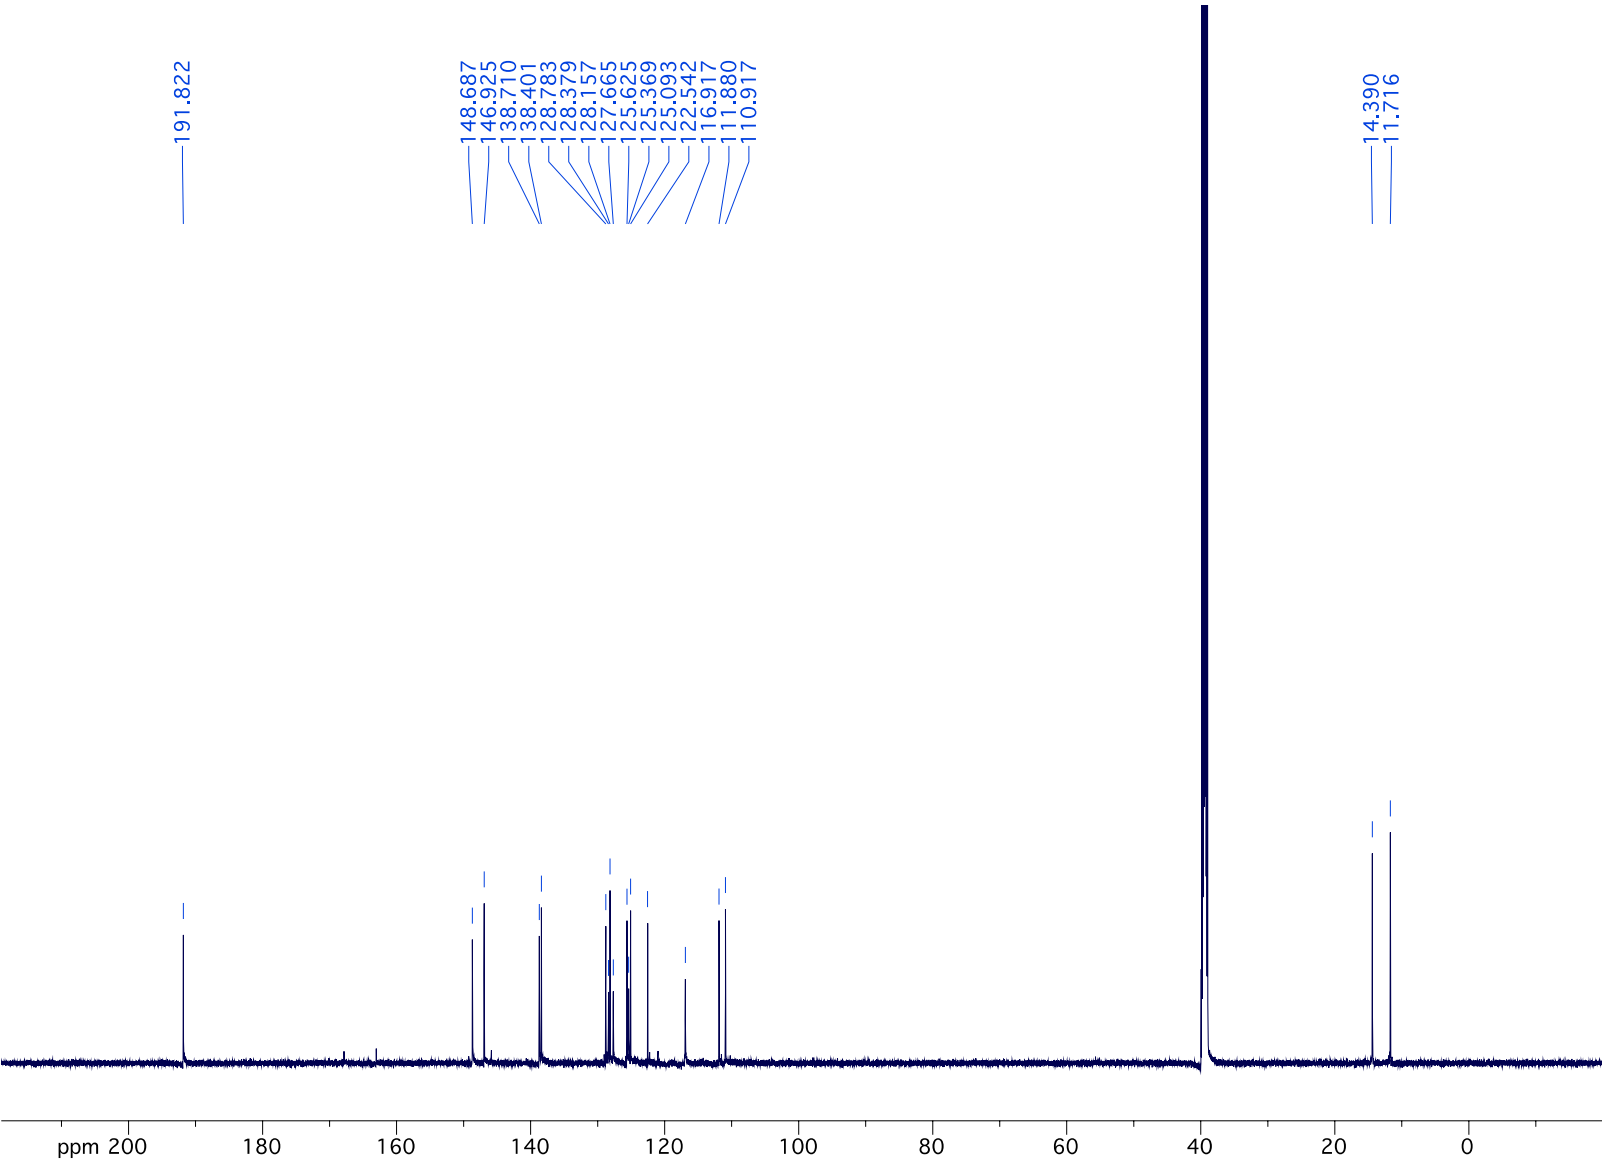



5,11-Dimethyl-10*H*-pyrido[3,4-*b*]carbazol-7-ol **7** (<sup>1</sup>H NMR spectrum in DMSO-*d*<sub>6</sub> at 300 MHz)

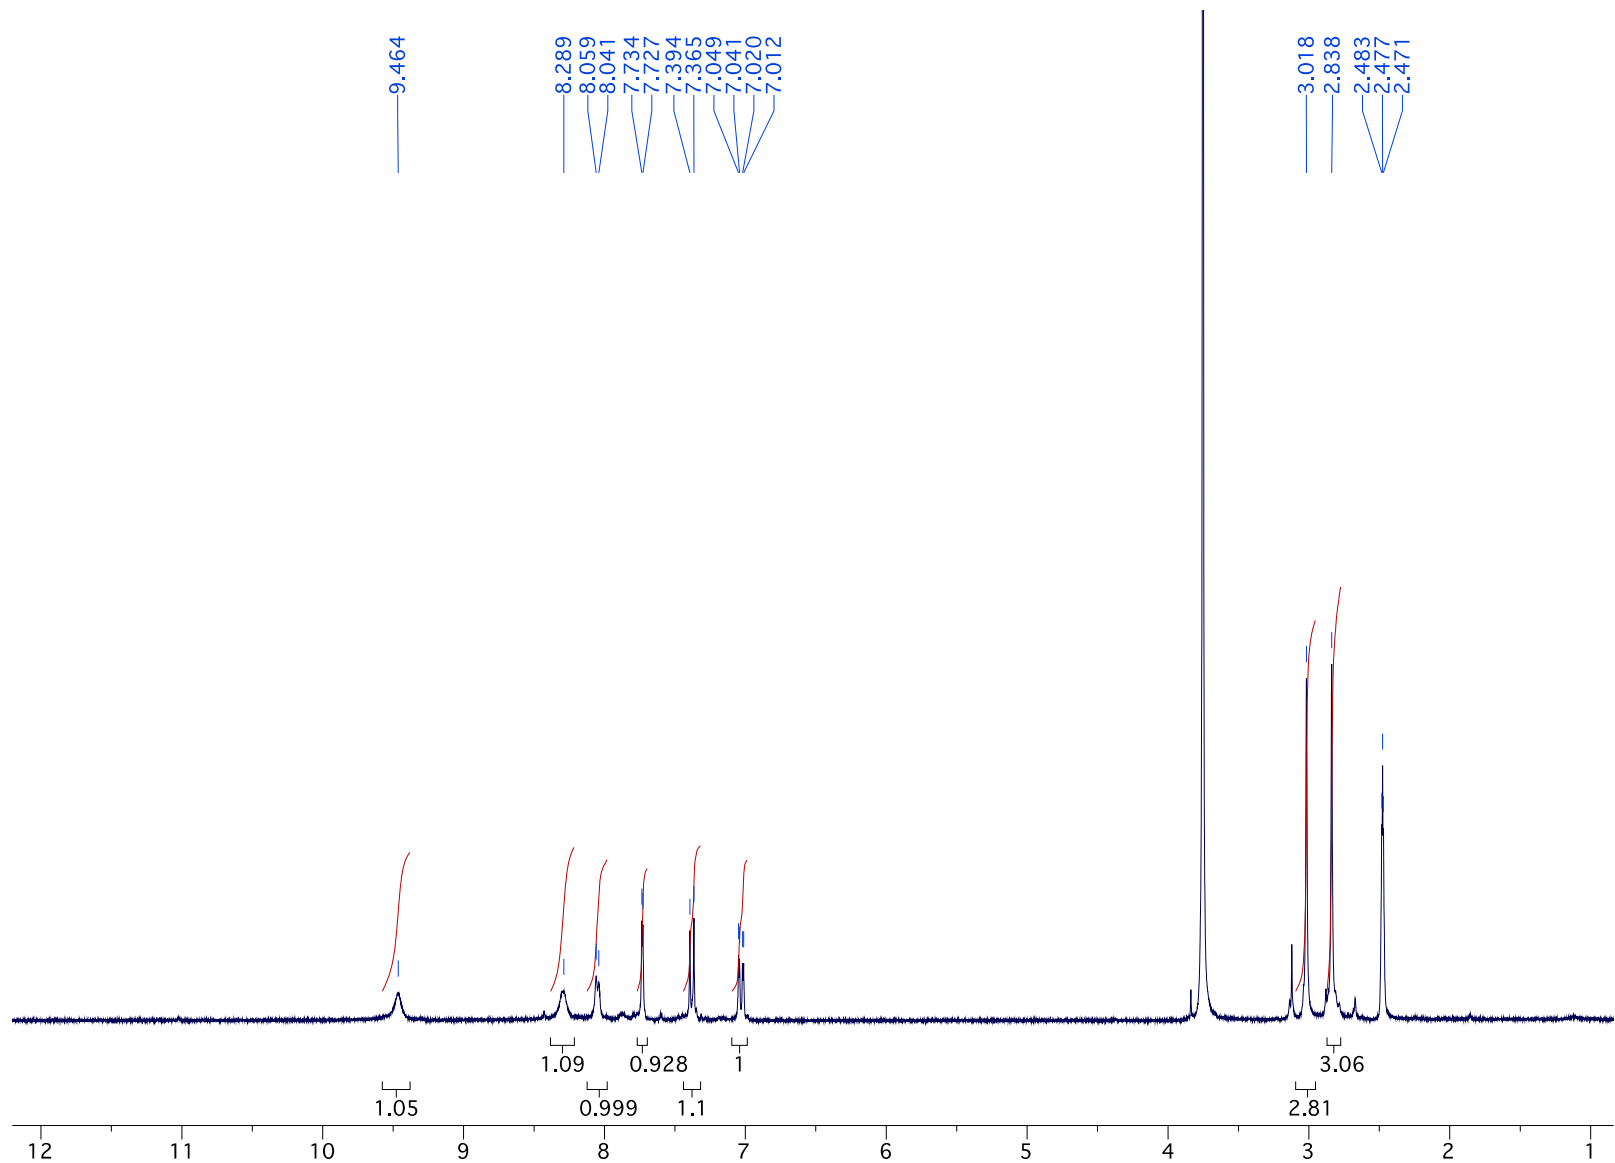

5,11-Dimethyl-10*H*-pyrido[3,4-*b*]carbazol-7-ol **7** (<sup>13</sup>C NMR spectrum in DMSO-*d*<sub>6</sub> at 75.5 MHz)

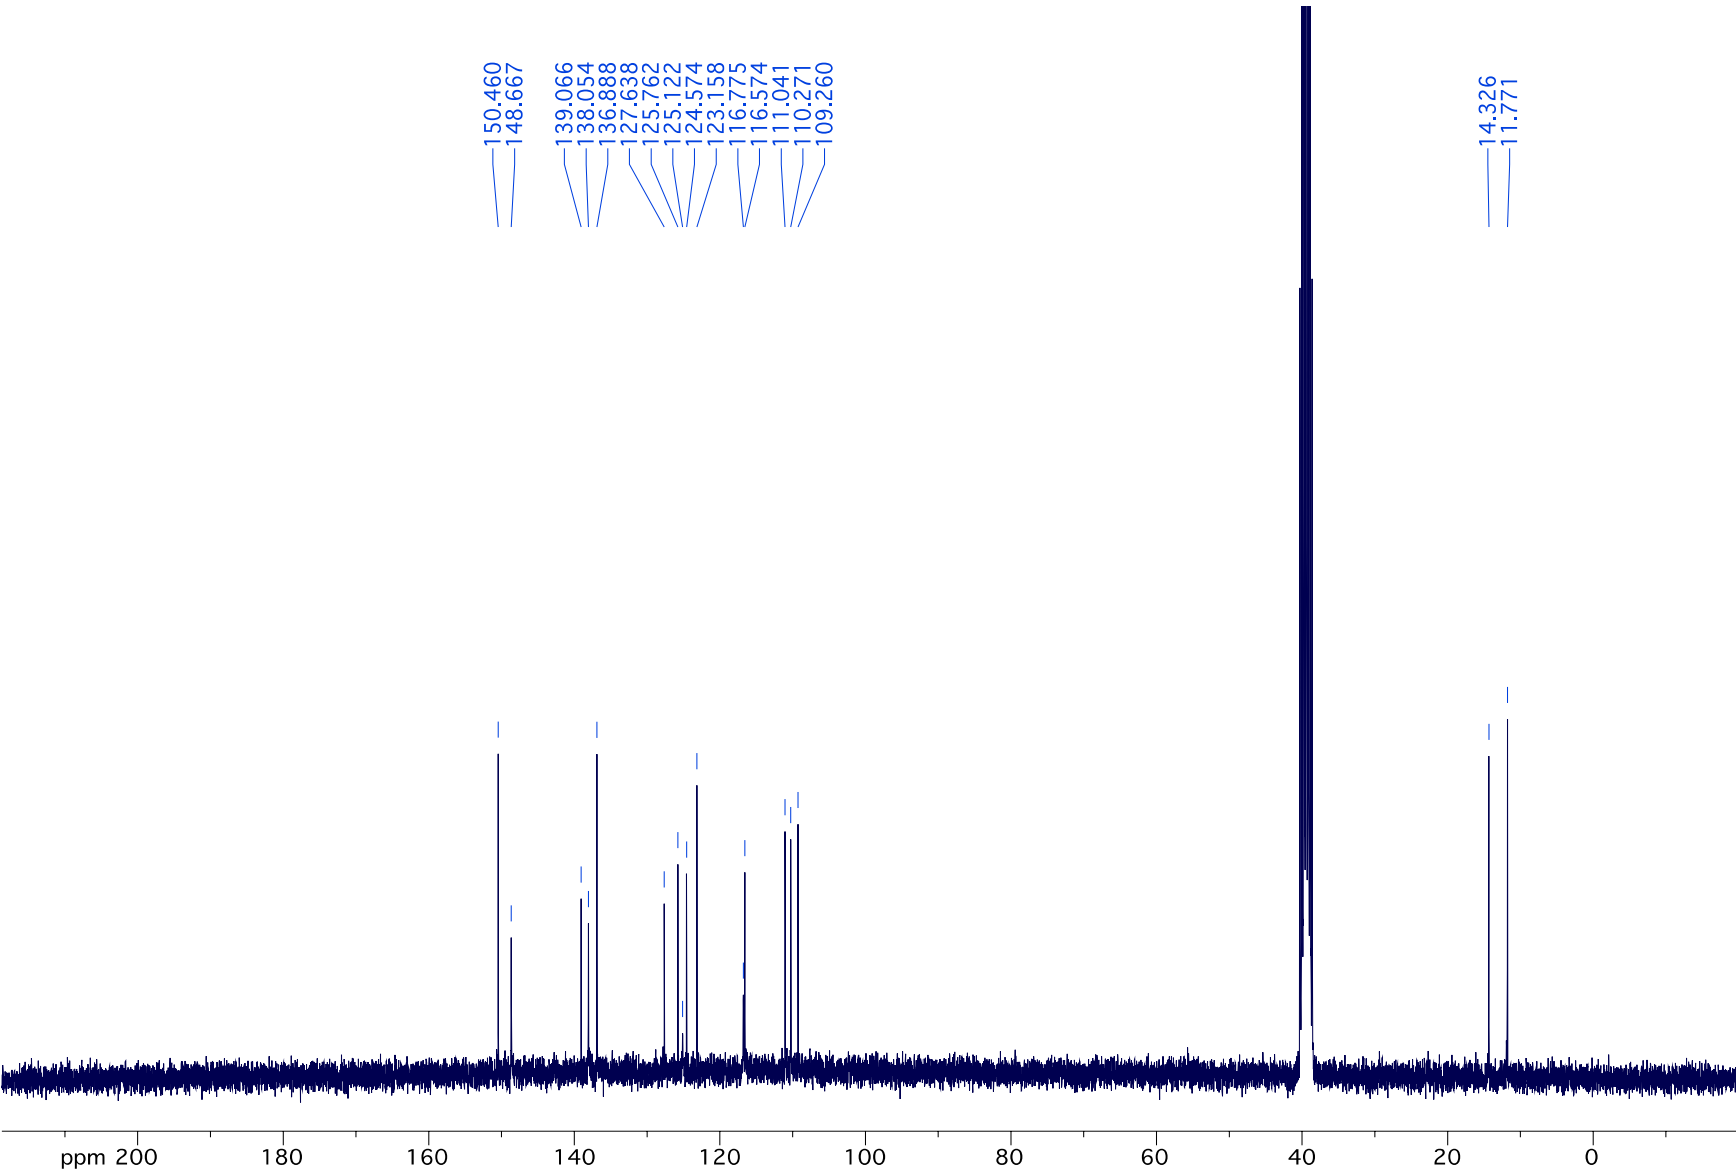

2-(5-Methoxy-1-(phenylsulfonyl)-1H-indole-2-carbonyl)benzoic acid **11** (<sup>1</sup>H NMR spectrum in DMSO-*d*<sub>6</sub> at 300 MHz)

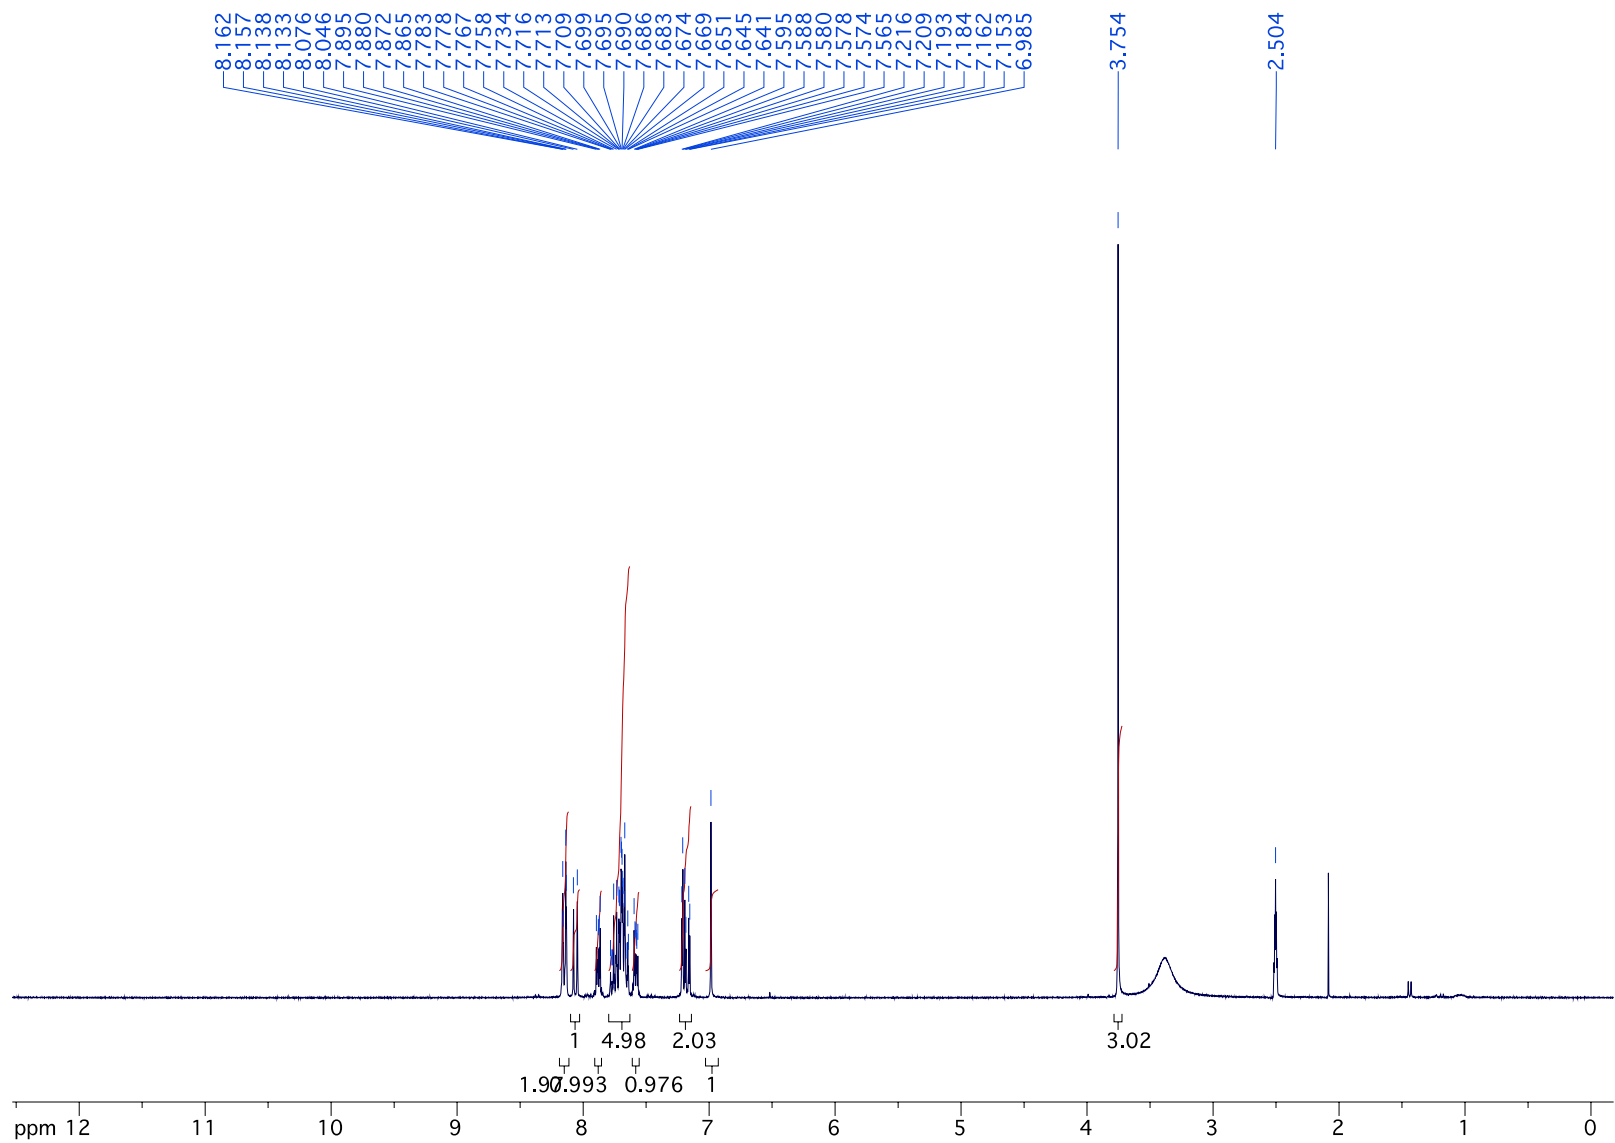

2-(5-Methoxy-1-(phenylsulfonyl)-1H-indole-2-carbonyl)benzoic acid **11** ( $^{13}\text{C}$  NMR spectrum in  $\text{DMSO-}d_6$  at 75.5 MHz)

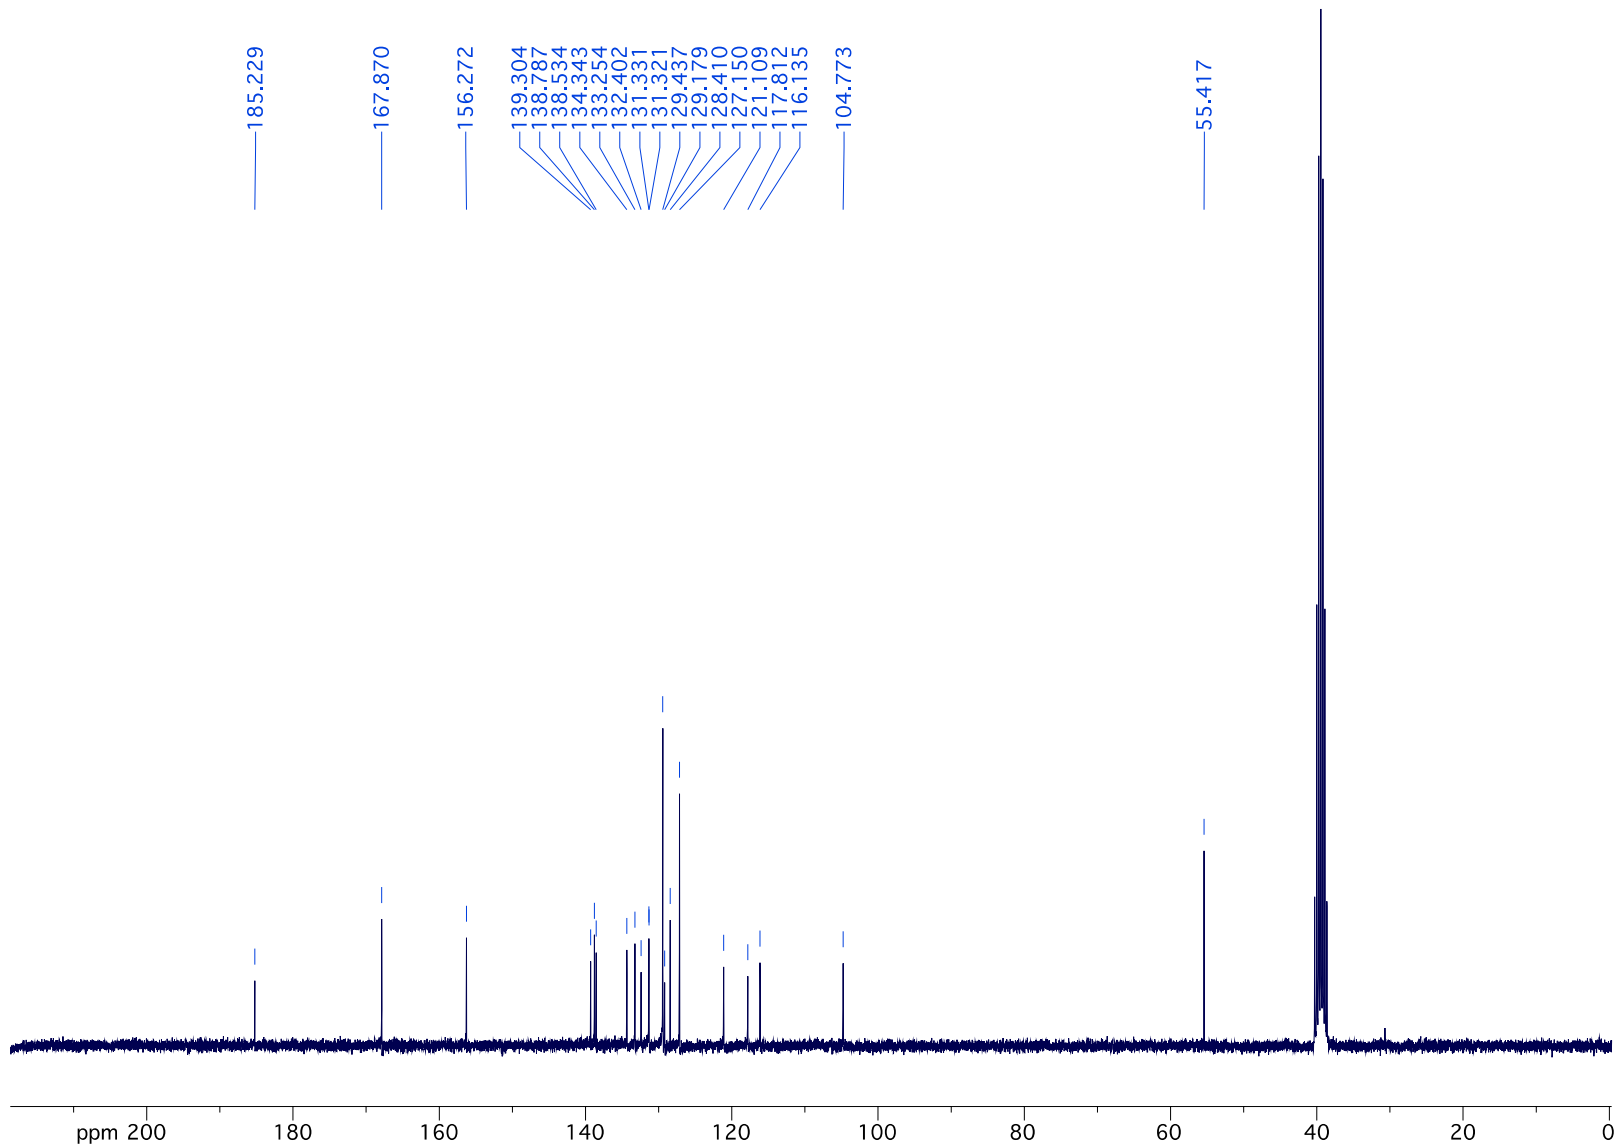

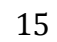

2-(5-Methoxy-1*H*-indole-2-carbonyl)benzoic acid **12** (<sup>13</sup>C NMR spectrum in DMSO-*d*<sub>6</sub> at 75.5 MHz)

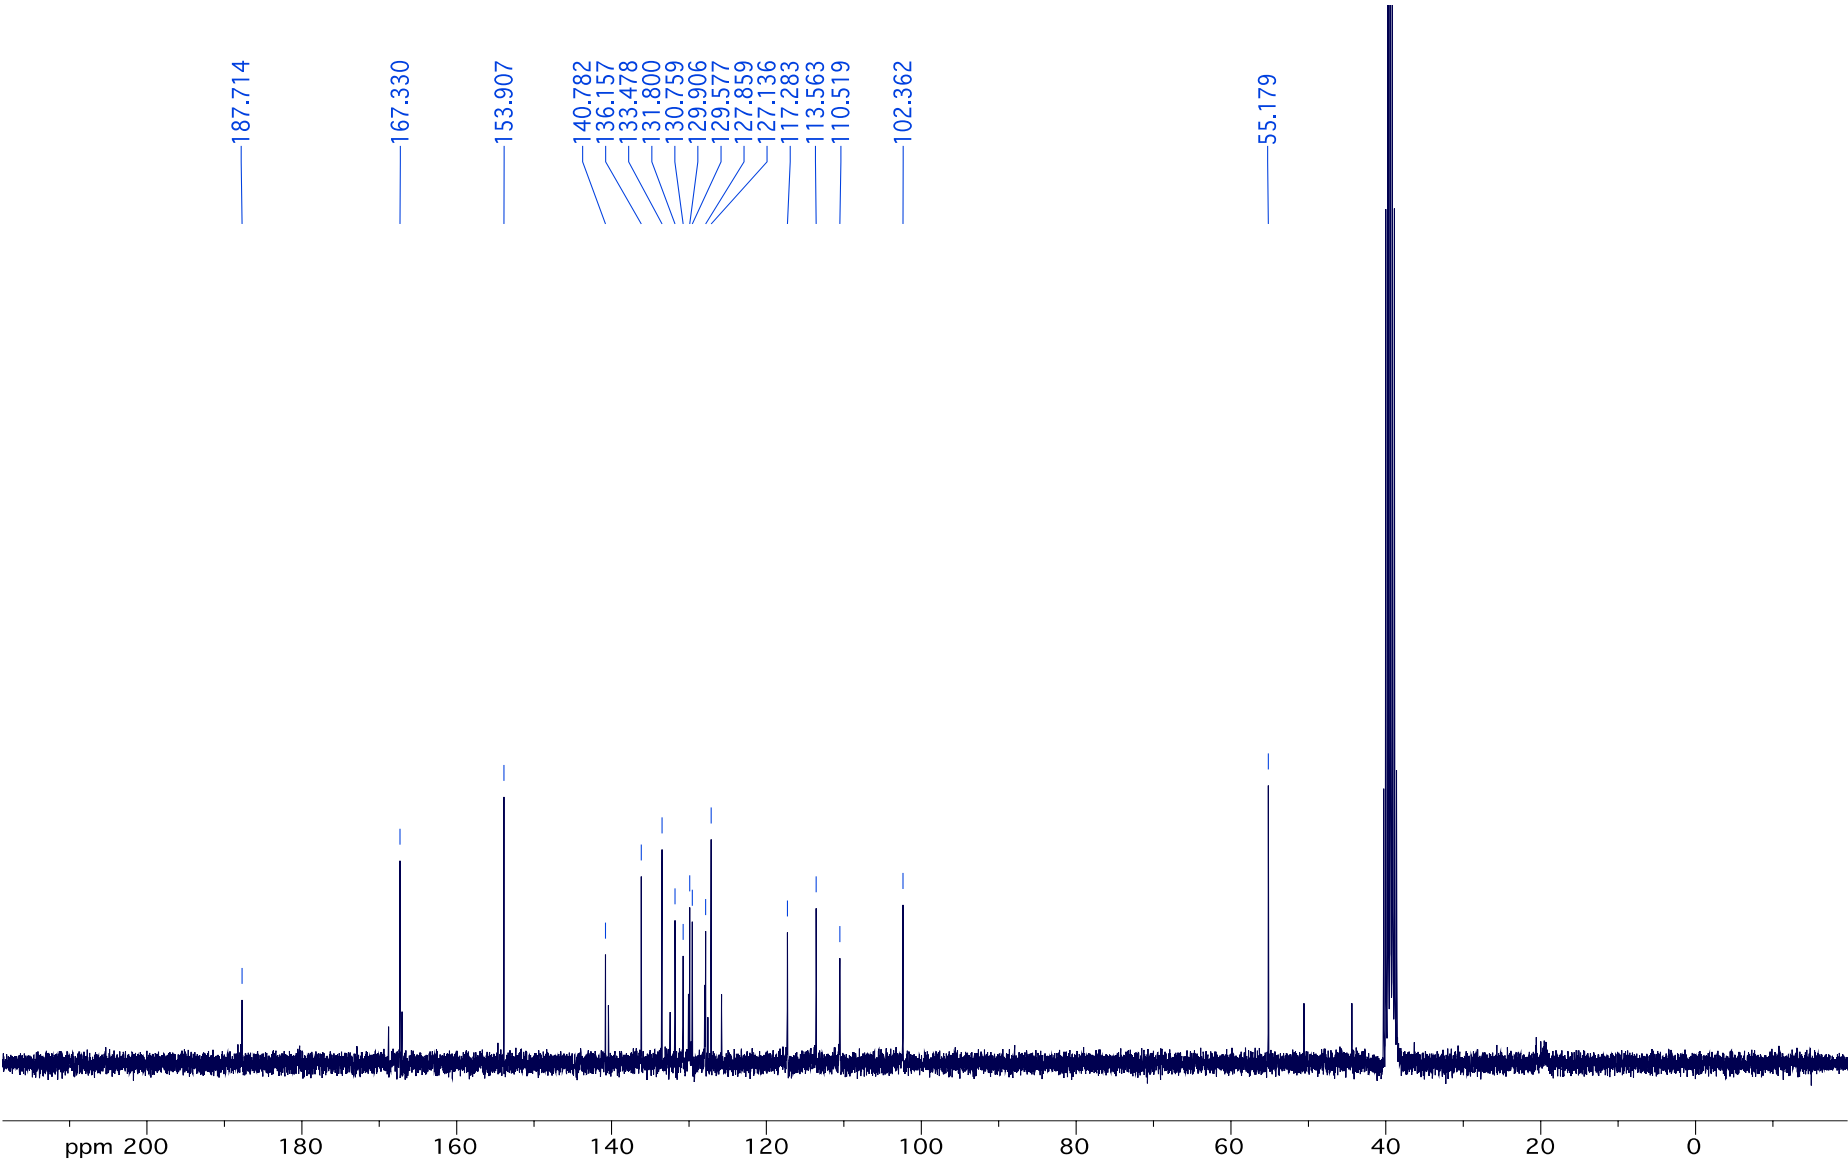



2-Methoxyindolo[1,2-*b*]isoquinoline-6,11-dione **13** (<sup>1</sup>H NMR spectrum in DMSO-*d*<sub>6</sub> at 300 MHz)

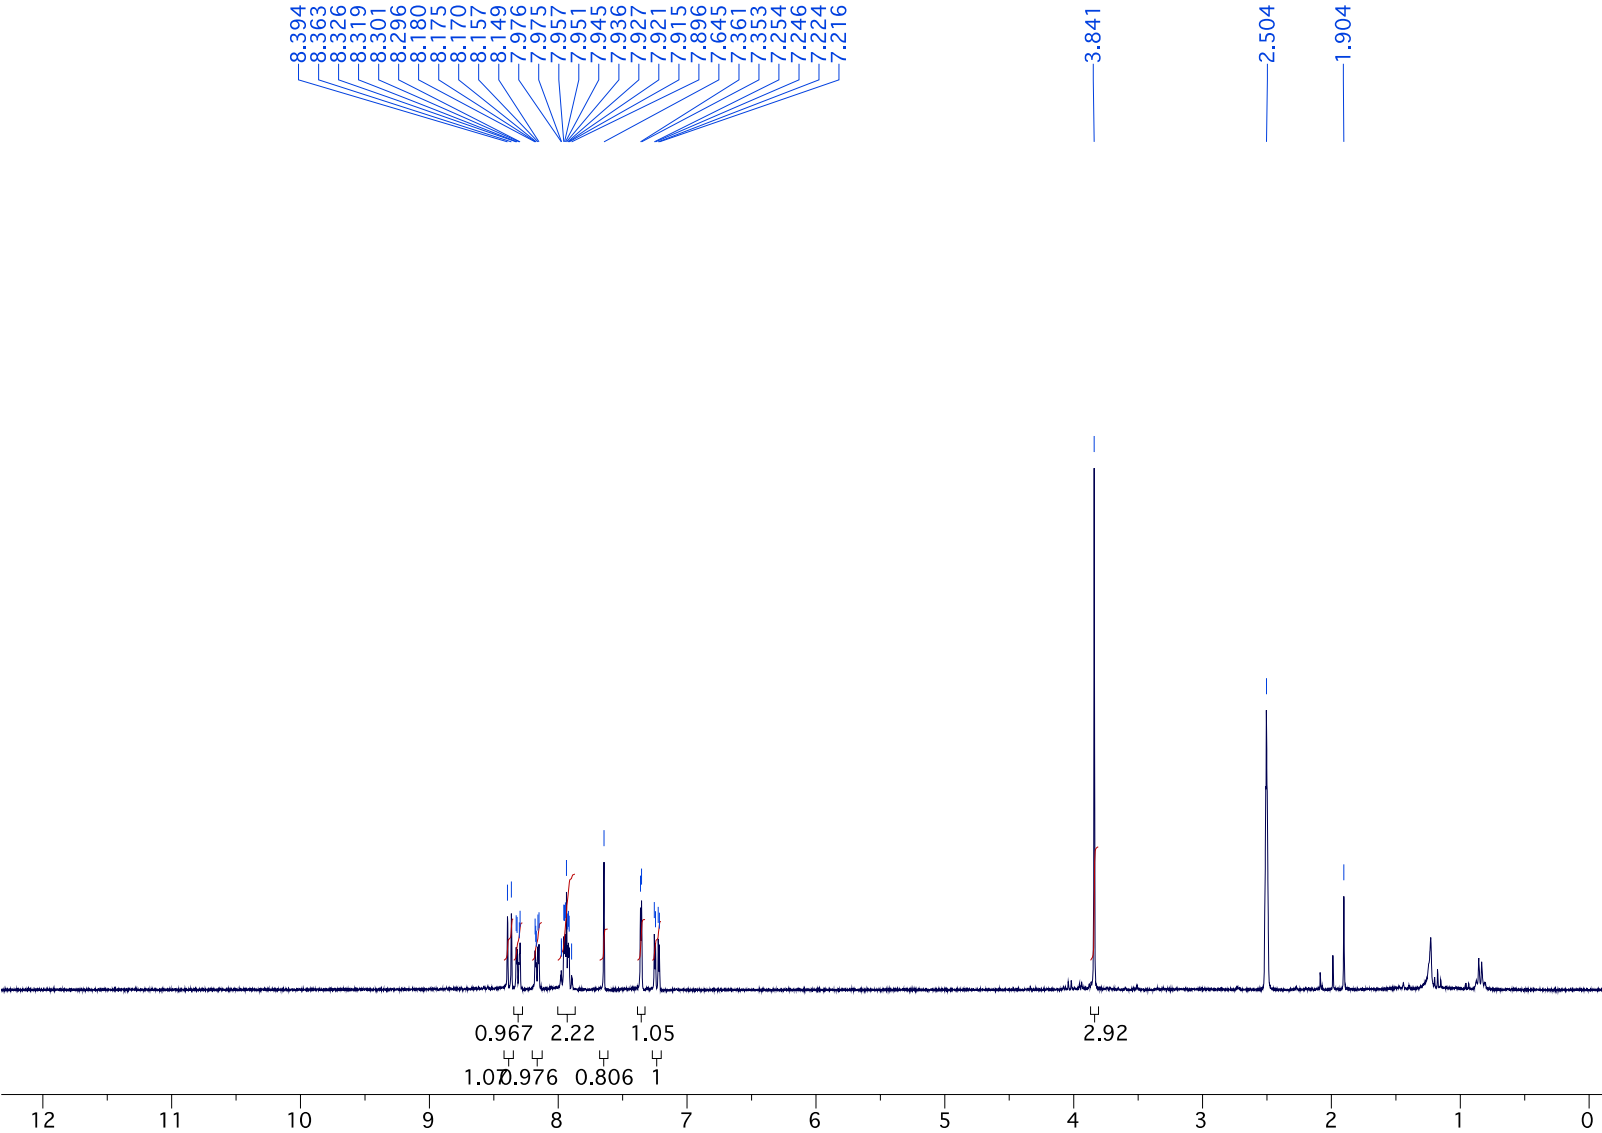

2-Methoxyindolo[1,2-*b*]isoquinoline-6,11-dione **13** ( $^{13}\text{C}$  NMR spectrum in DMSO- $d_6$  at 75.5 MHz)

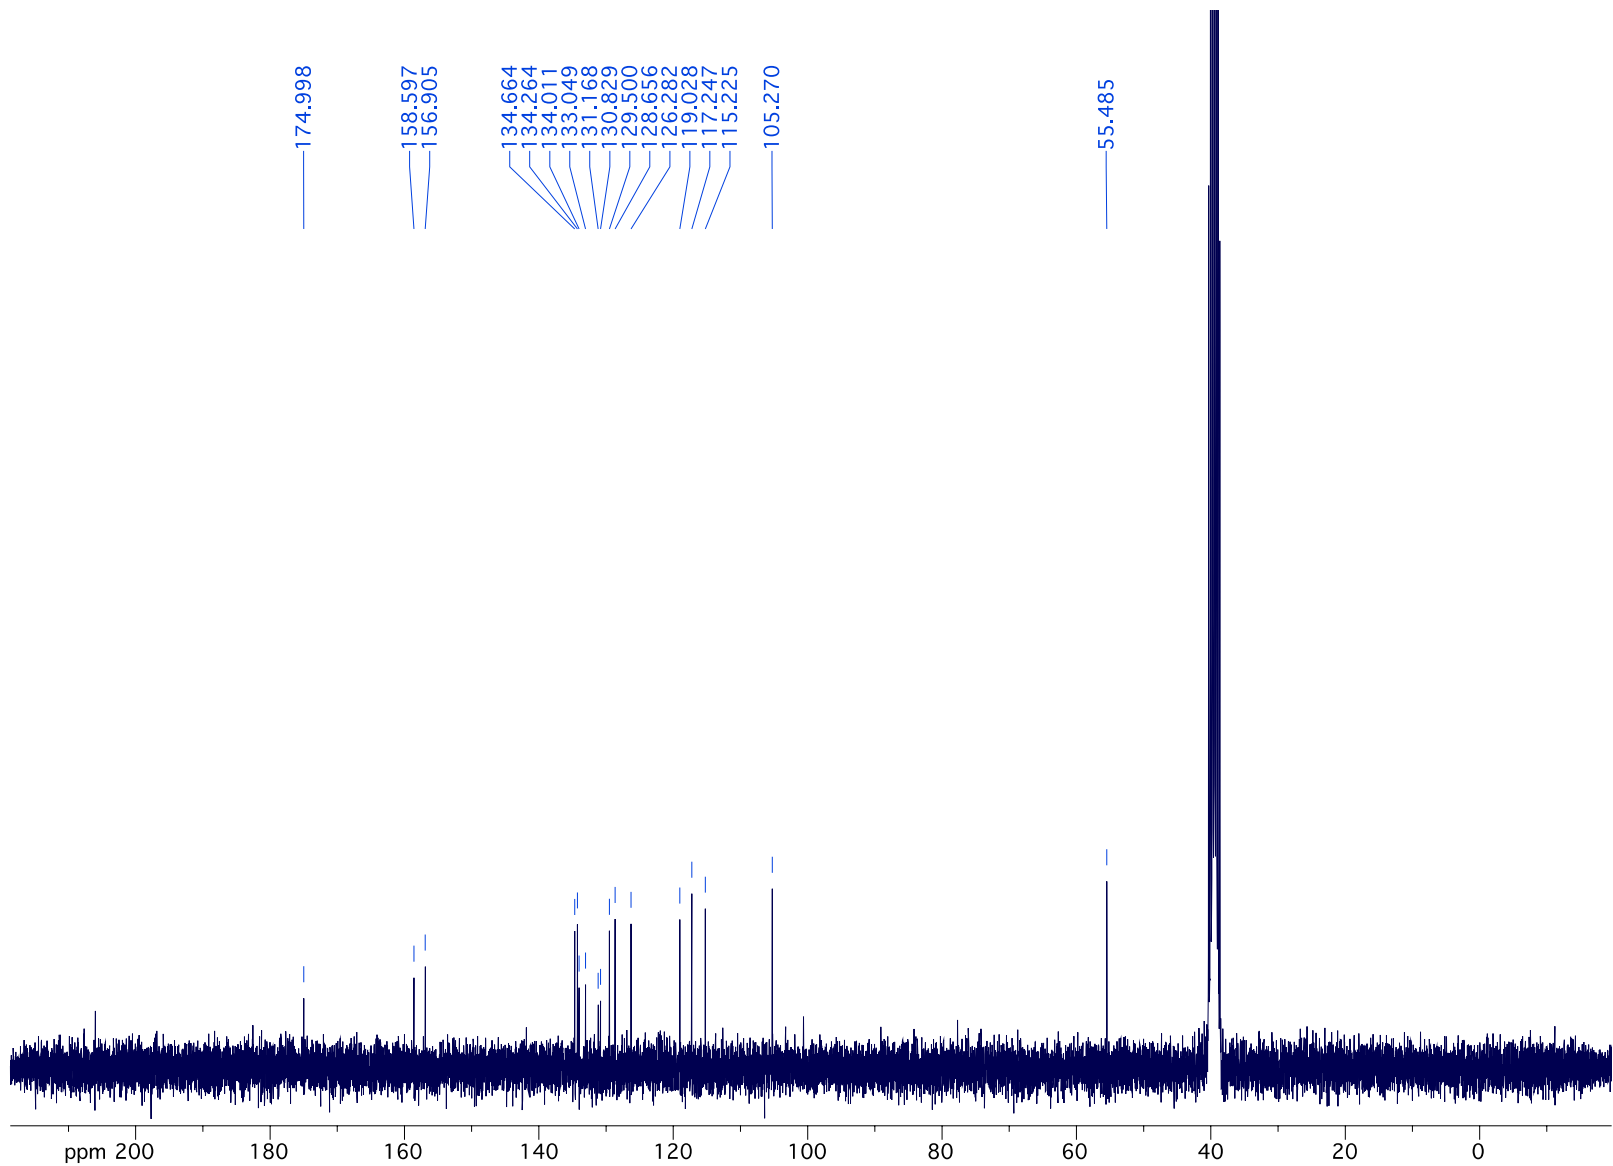

2-Methoxy-6,11-dimethyl-5*H*-benzo[*b*]carbazole **14** (<sup>1</sup>H NMR spectrum in DMSO-*d*<sub>6</sub> at 300 MHz)

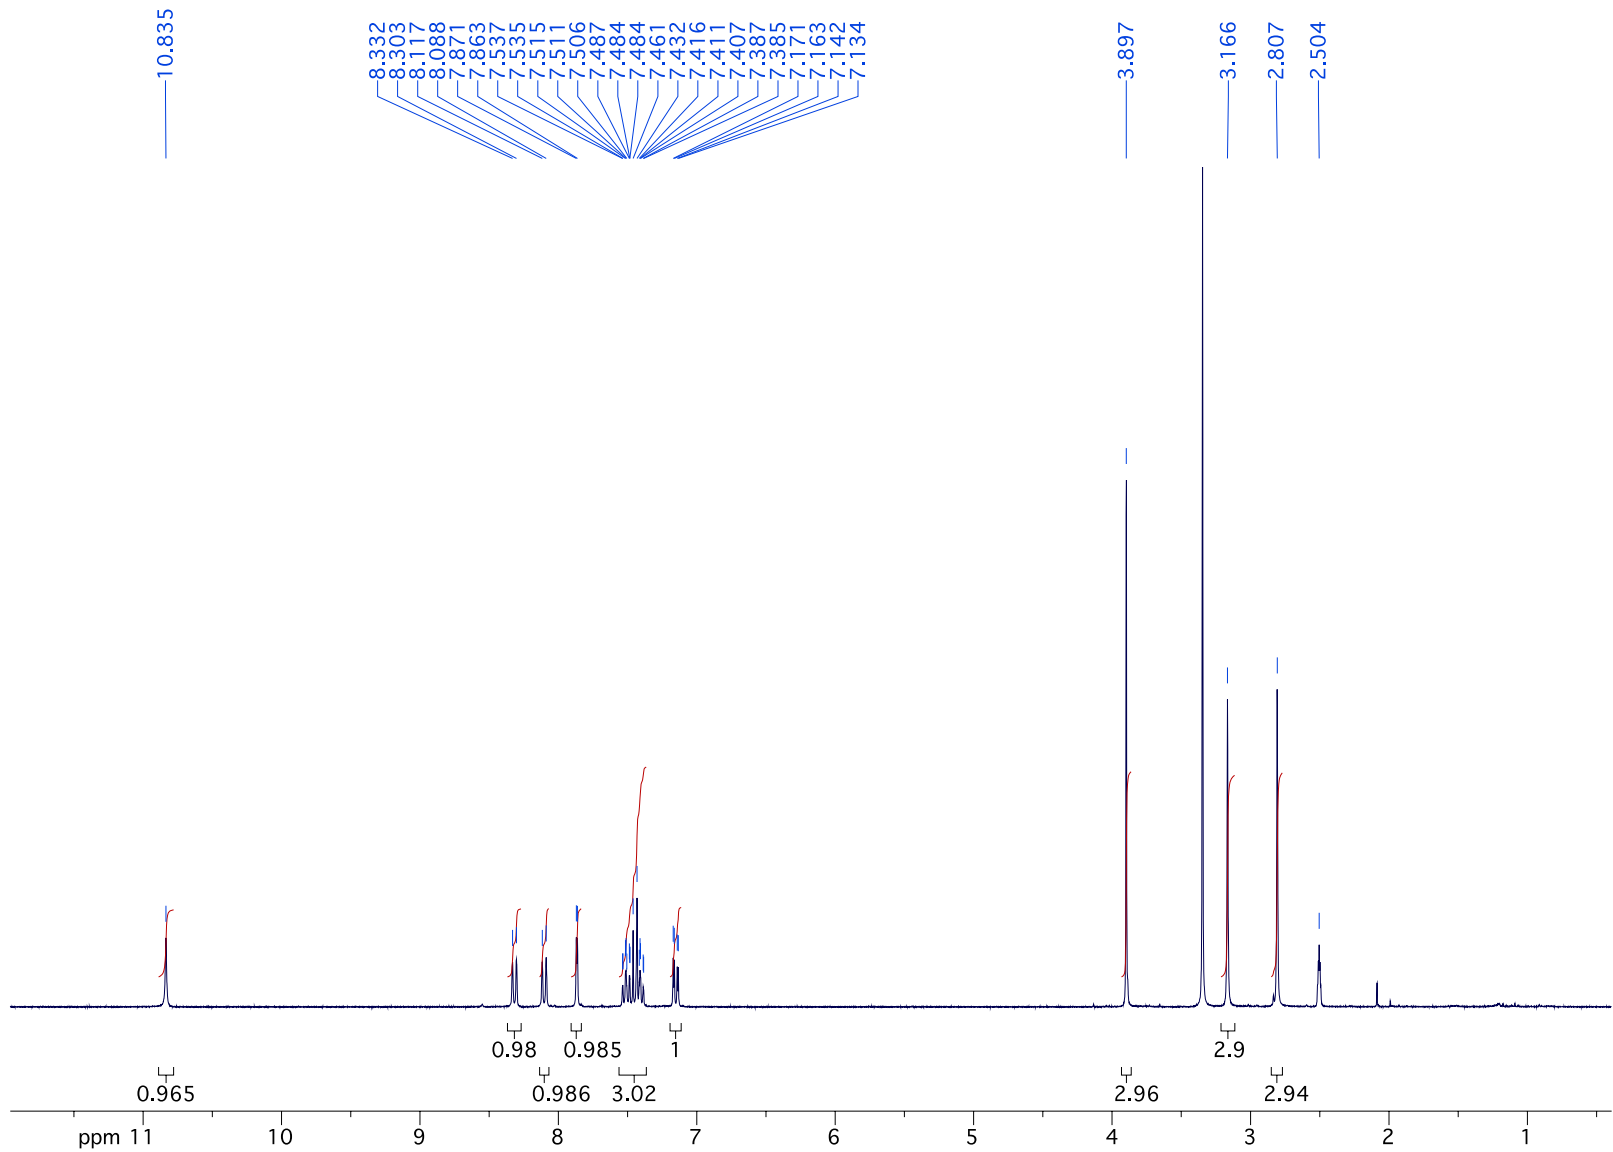

2-Methoxy-6,11-dimethyl-5*H*-benzo[*b*]carbazole **14** (<sup>13</sup>C NMR spectrum in DMSO-*d*<sub>6</sub> at 75.5 MHz)

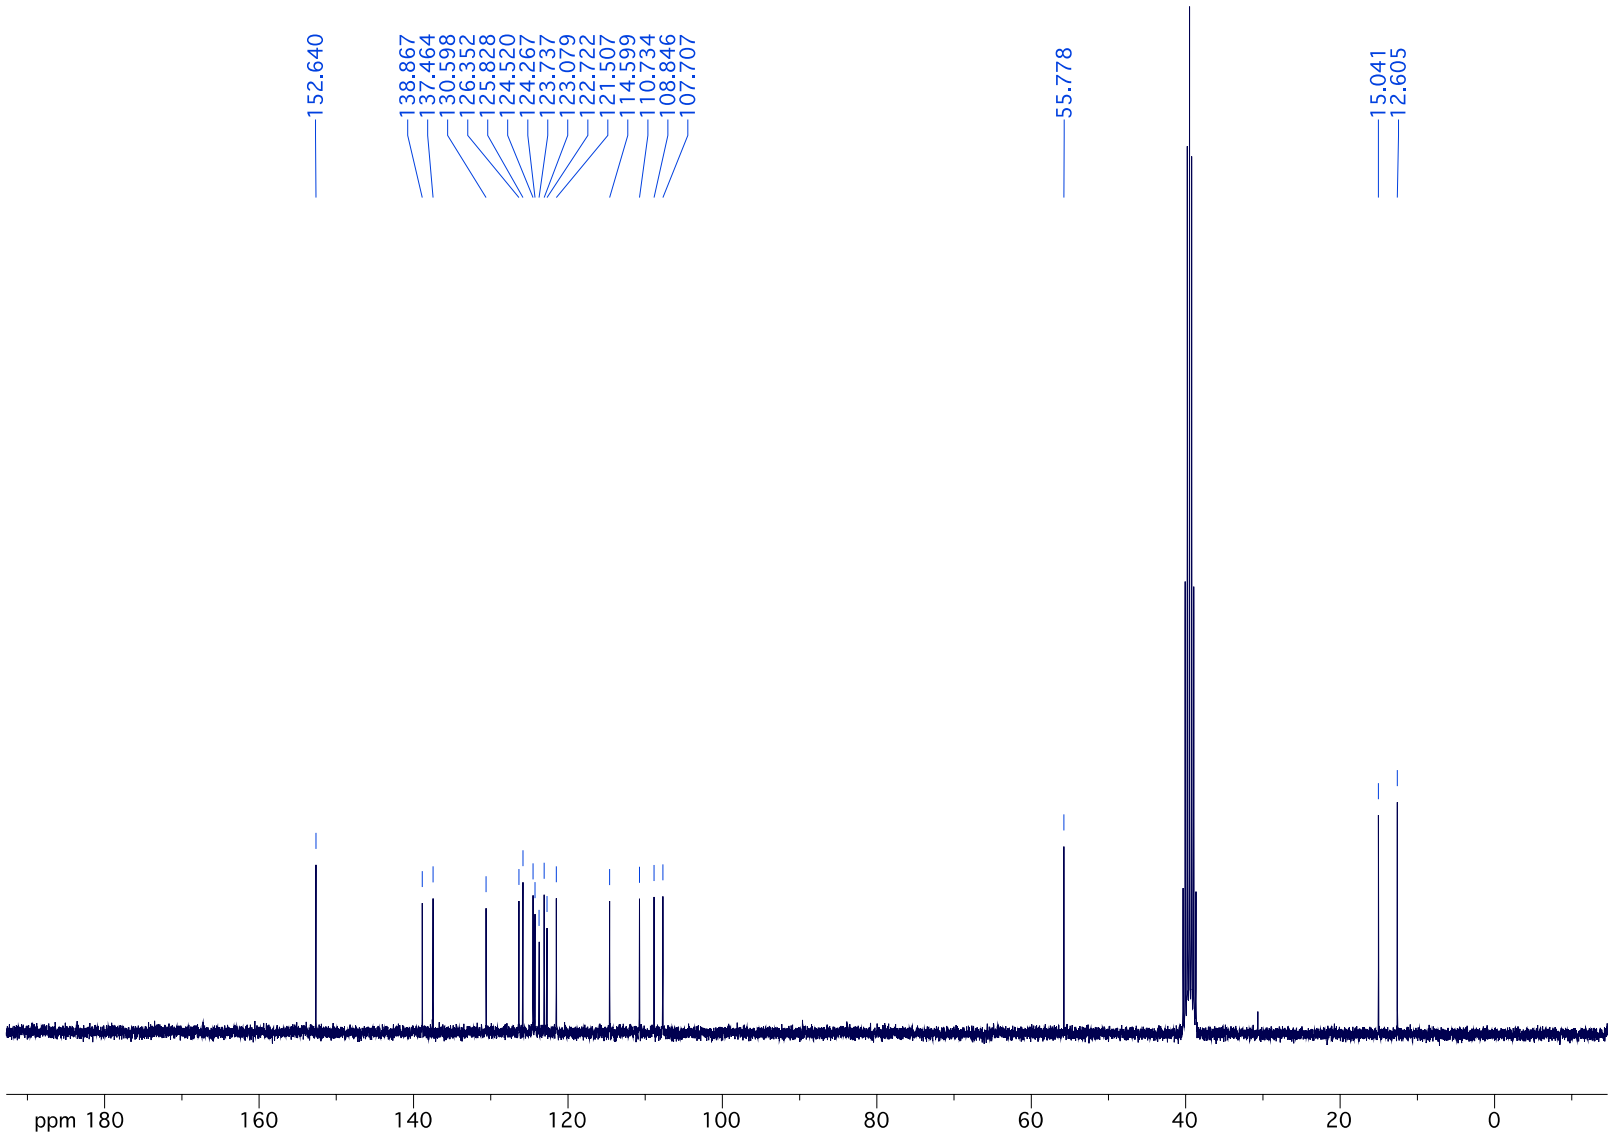

6,11-Dimethyl-5*H*-benzo[*b*]carbazol-2-ol **9** (<sup>1</sup>H NMR water suppression in DMSO-*d*<sub>6</sub> at 300 MHz)

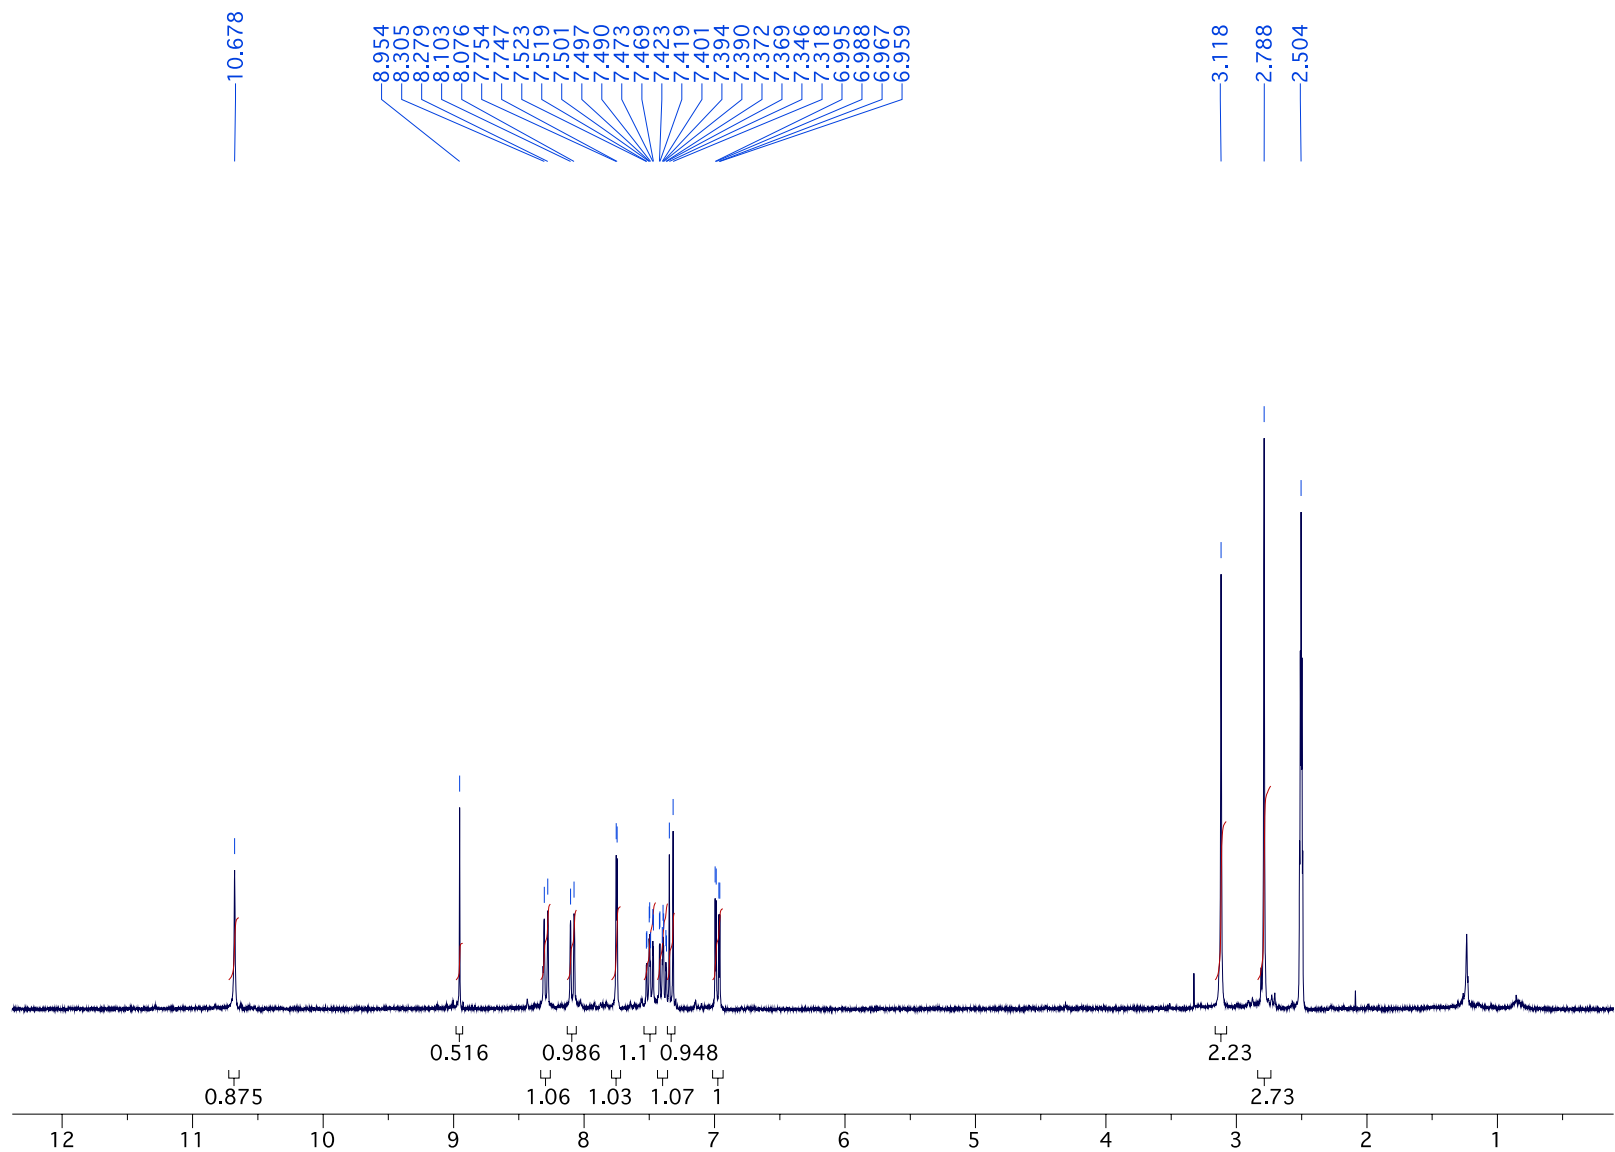

6,11-Dimethyl-5*H*-benzo[*b*]carbazol-2-ol **9** (<sup>13</sup>C NMR spectrum in DMSO-*d*<sub>6</sub> at 75.5 MHz)

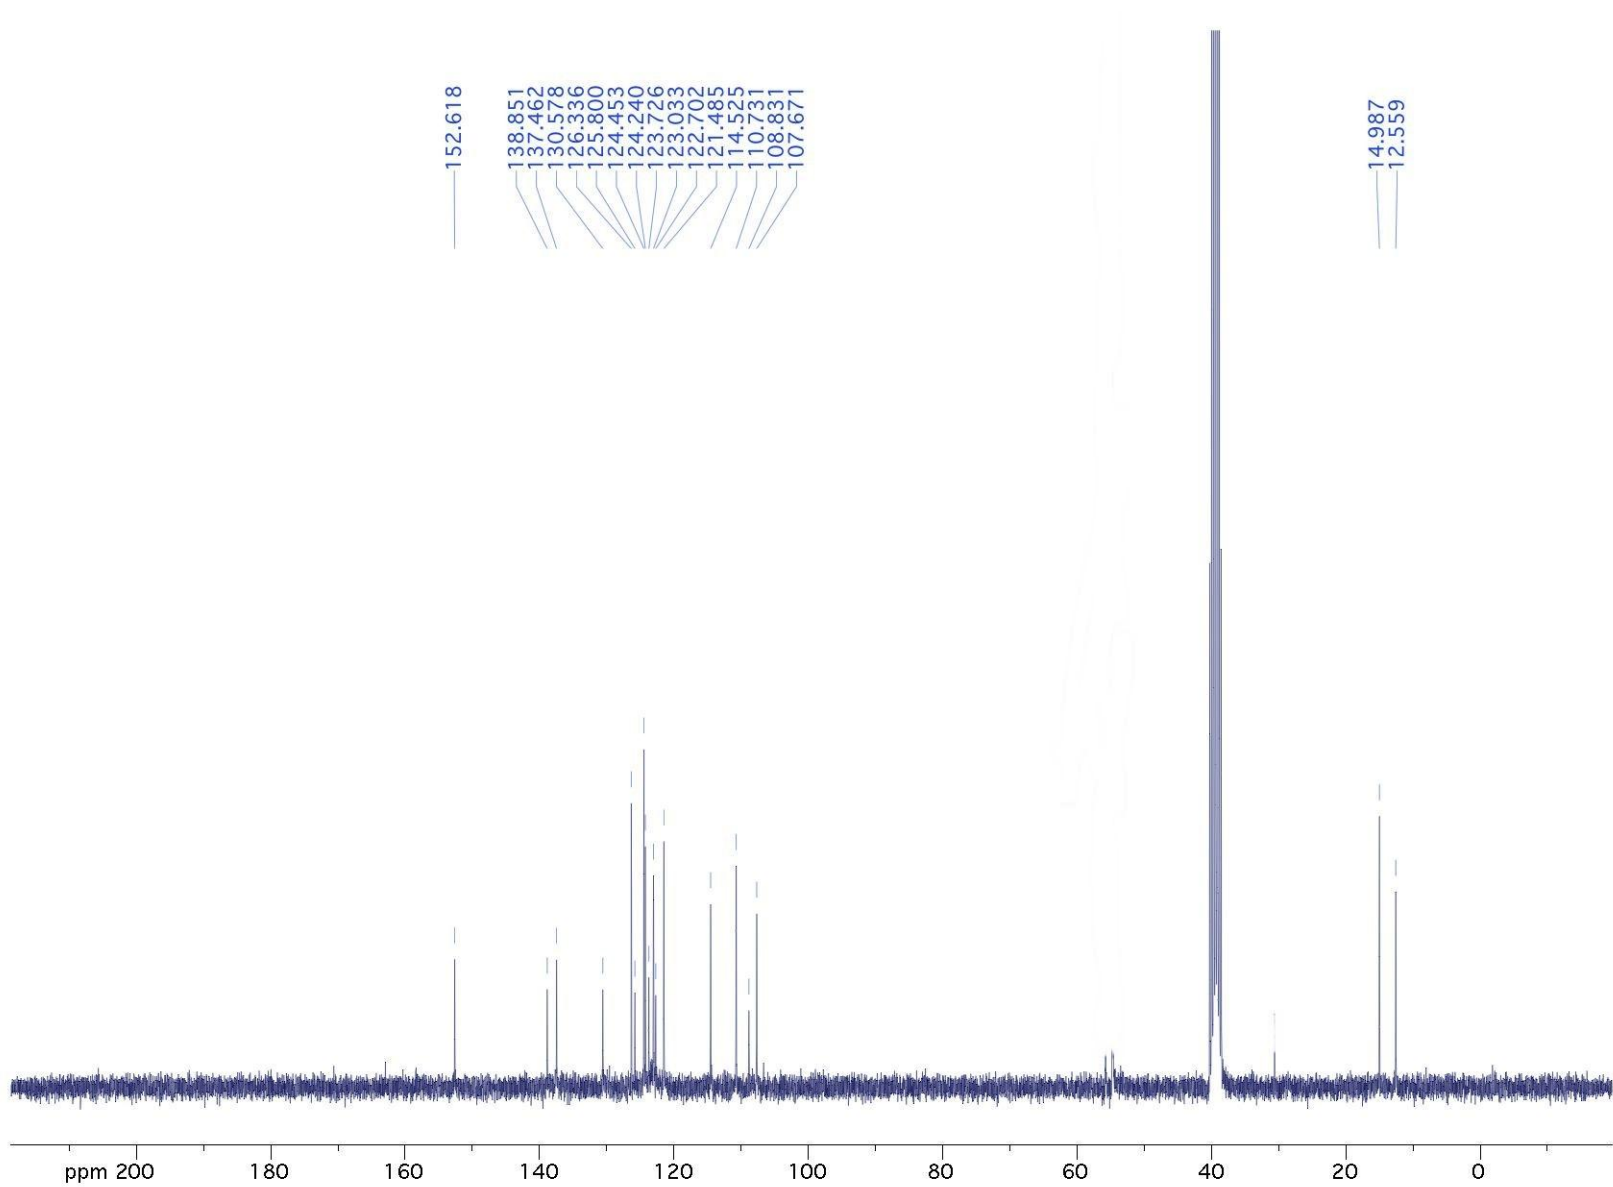



2-Methyloellipticinum iodide **16** (<sup>1</sup>H NMR spectrum in DMSO-*d*<sub>6</sub> at 400 MHz)

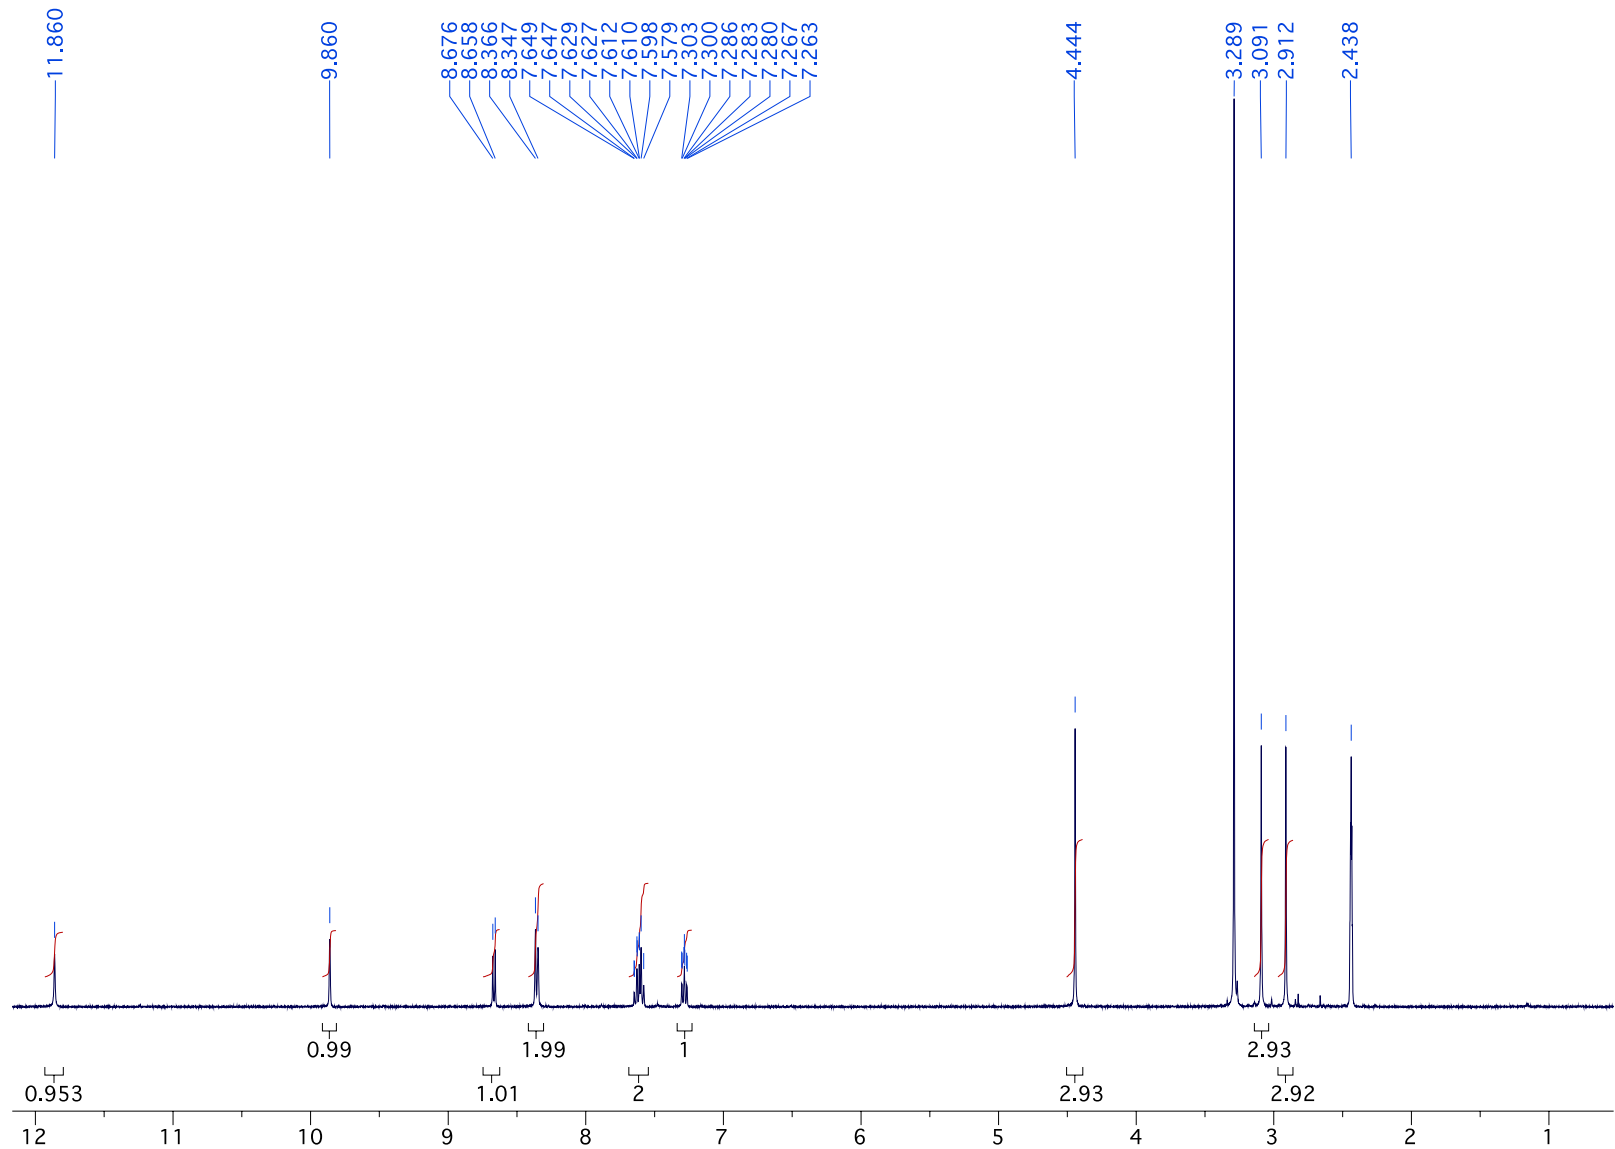

2-Methylisoellpticinium iodide **16** ( $^{13}\text{C}$  NMR spectrum in  $\text{DMSO-}d_6$  at 150.9 MHz)

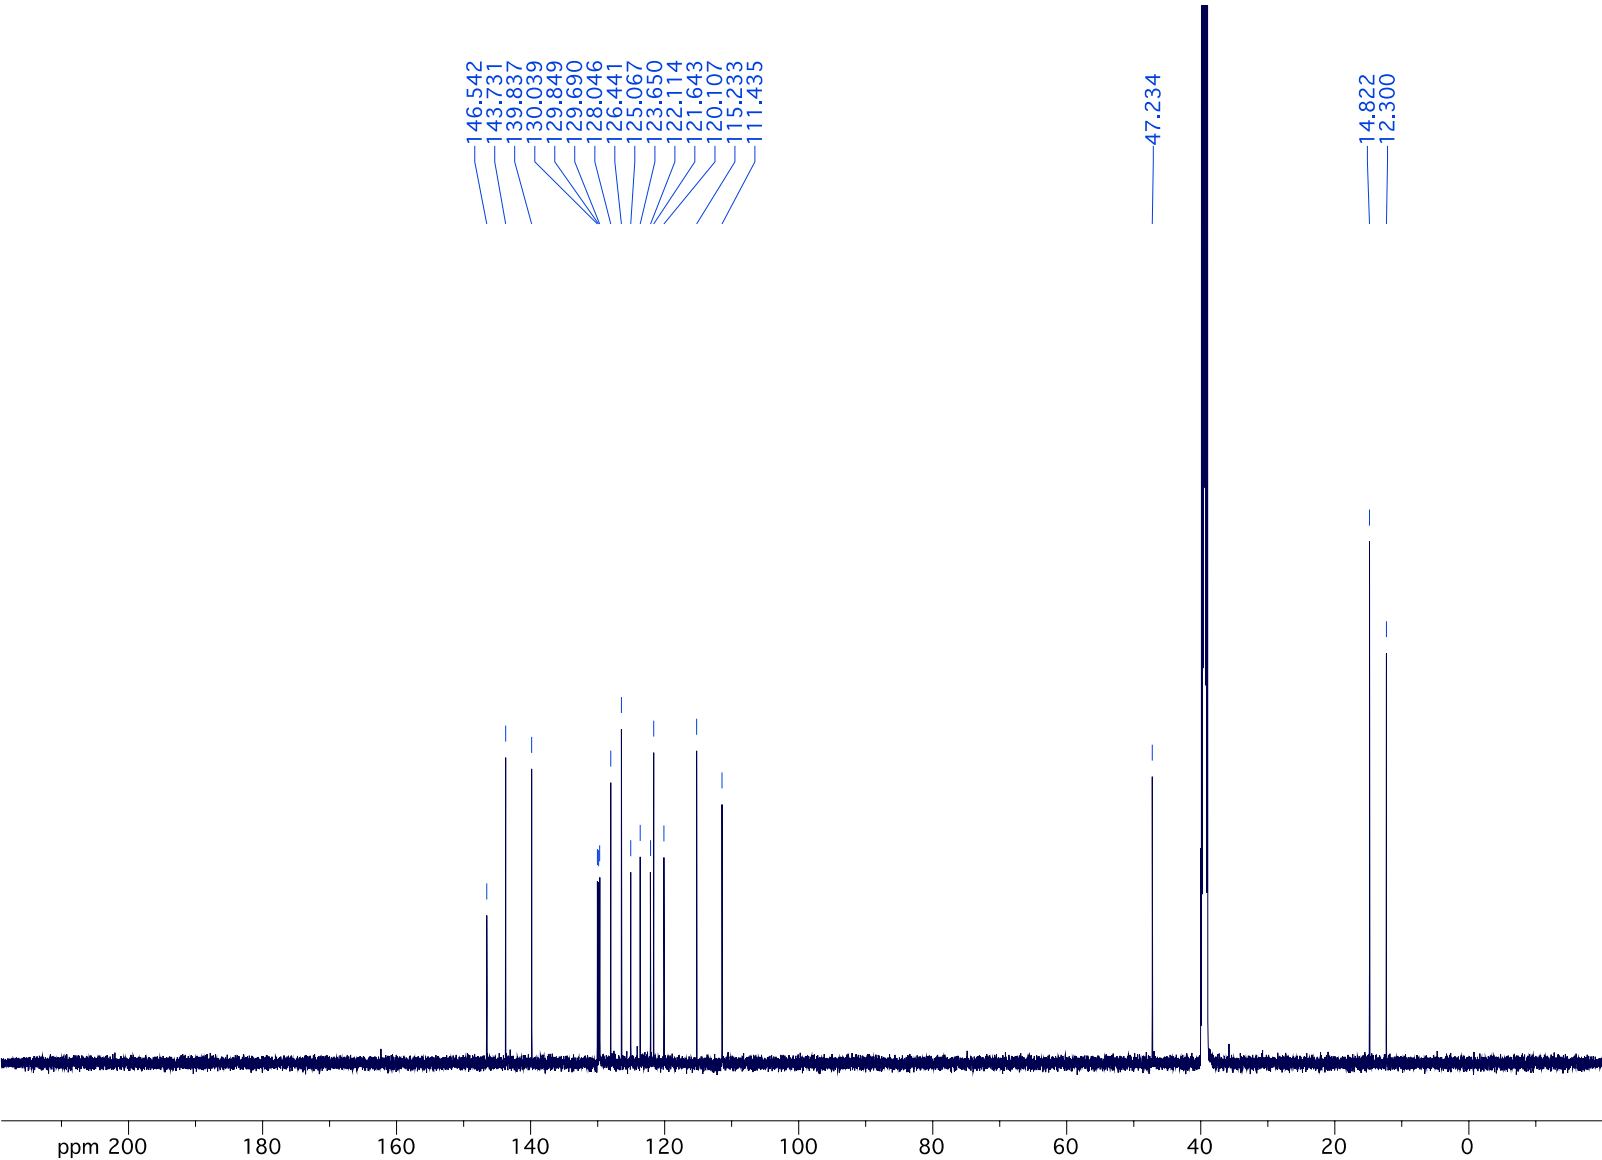

2-(3'-Cyanopropyl)isoellipticinium chloride **17** (<sup>1</sup>H NMR spectrum in DMSO-*d*<sub>6</sub> at 300 MHz)

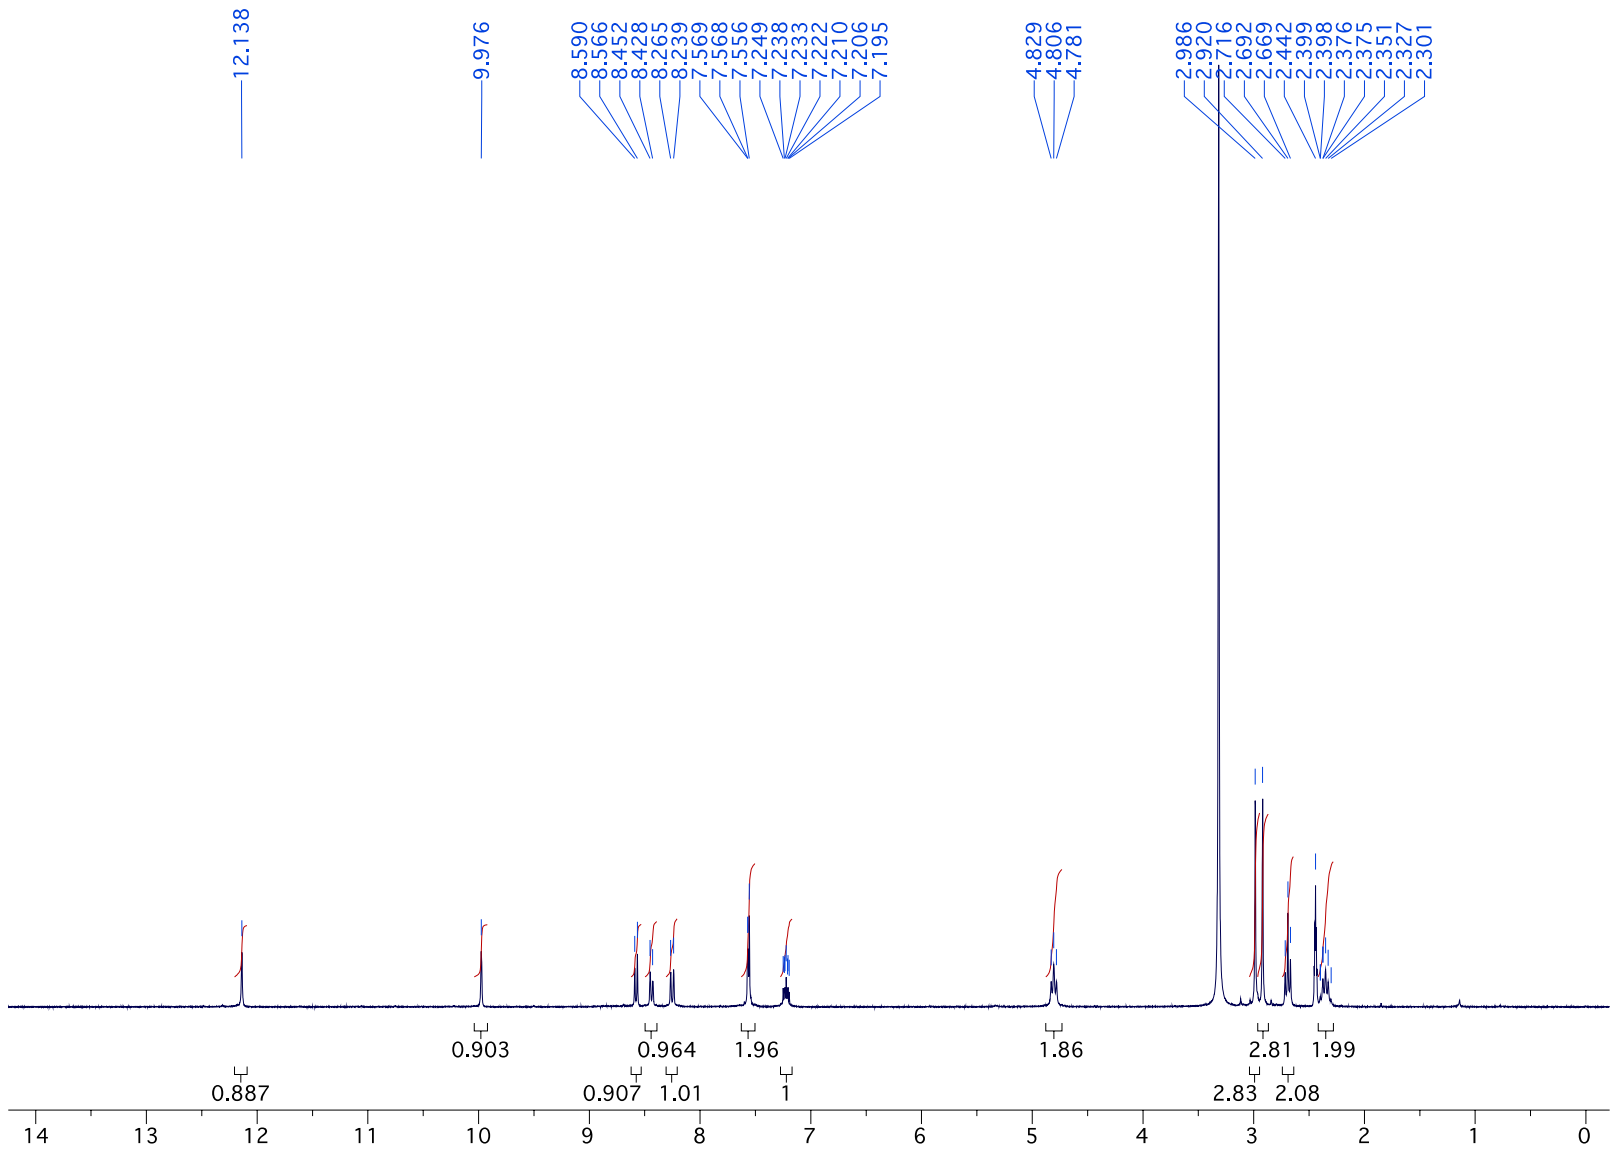

2-(3'-Cyanopropyl)isoellipticinium chloride **17** ( $^{13}\text{C}$  NMR spectrum in  $\text{DMSO-}d_6$  at 75.5 MHz)

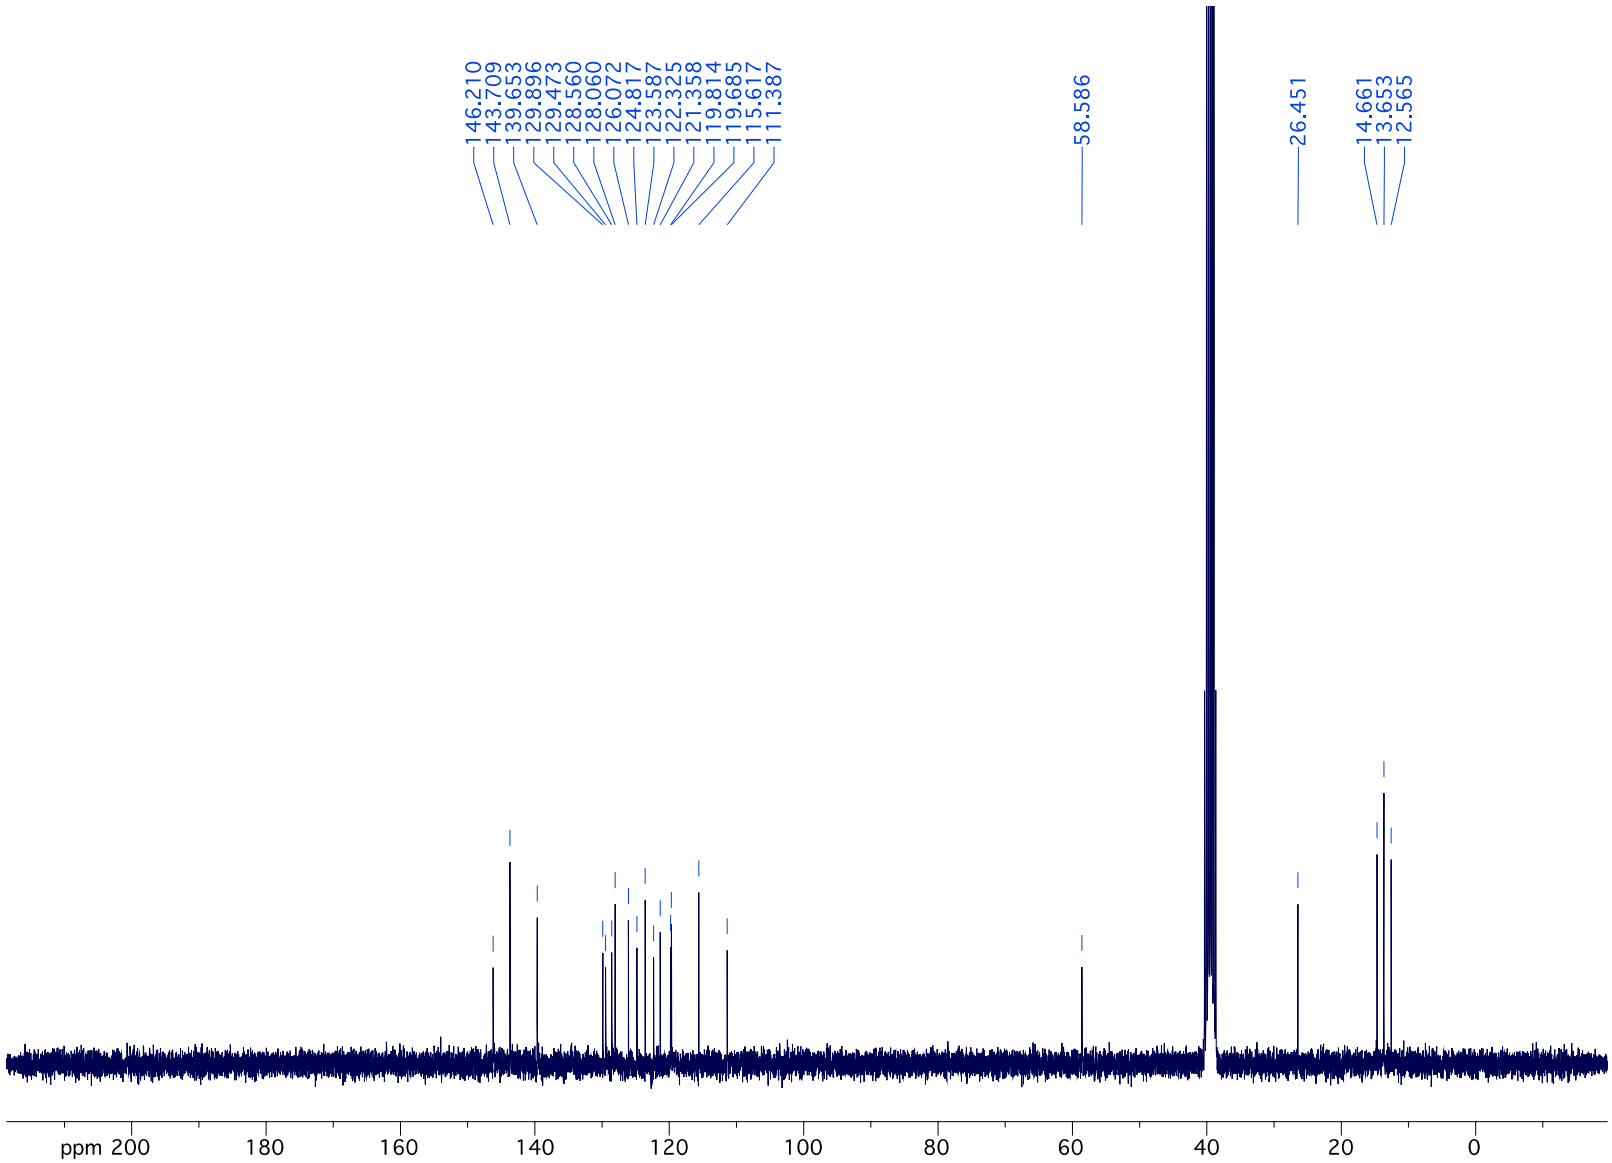

2-(4'-Cyanobutyl)isoellipticinium chloride **18** (<sup>1</sup>H NMR spectrum in DMSO-*d*<sub>6</sub> at 300 MHz)

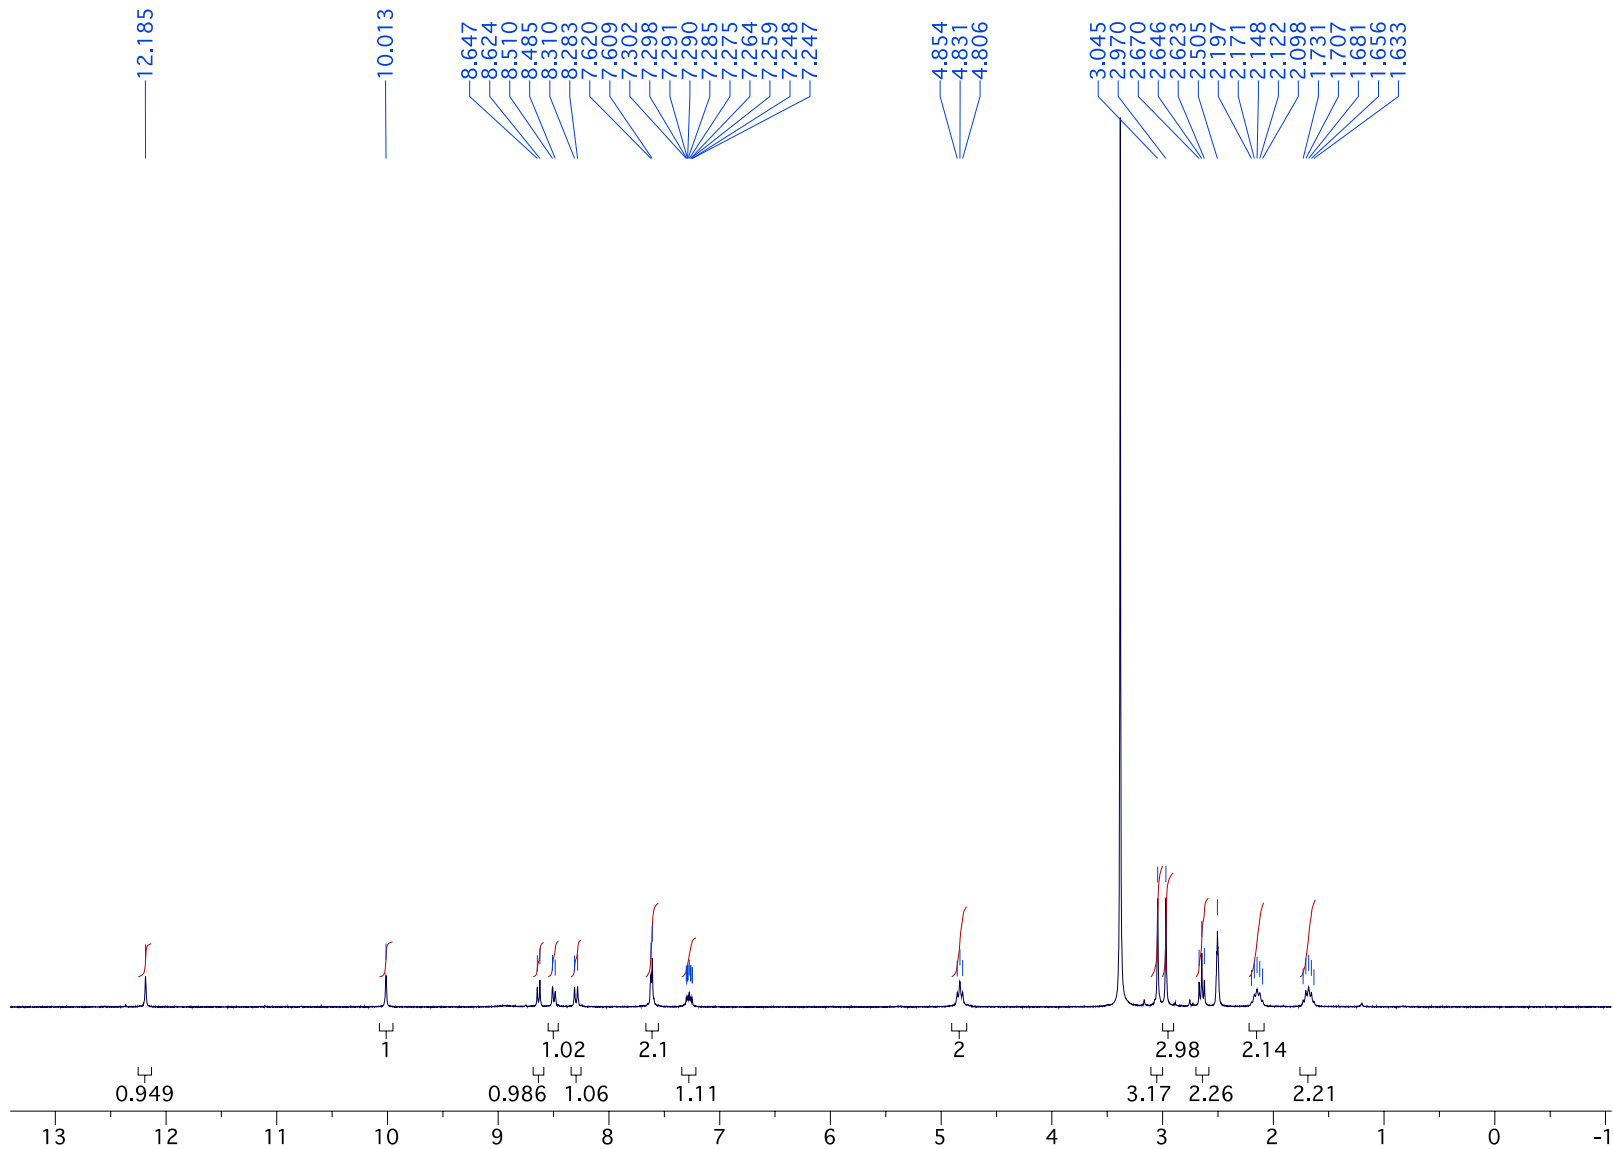

2-(4'-Cyanobutyl)isoellipticinium chloride **18** ( $^{13}\text{C}$  NMR spectrum in DMSO- $d_6$  at 75.5 MHz)

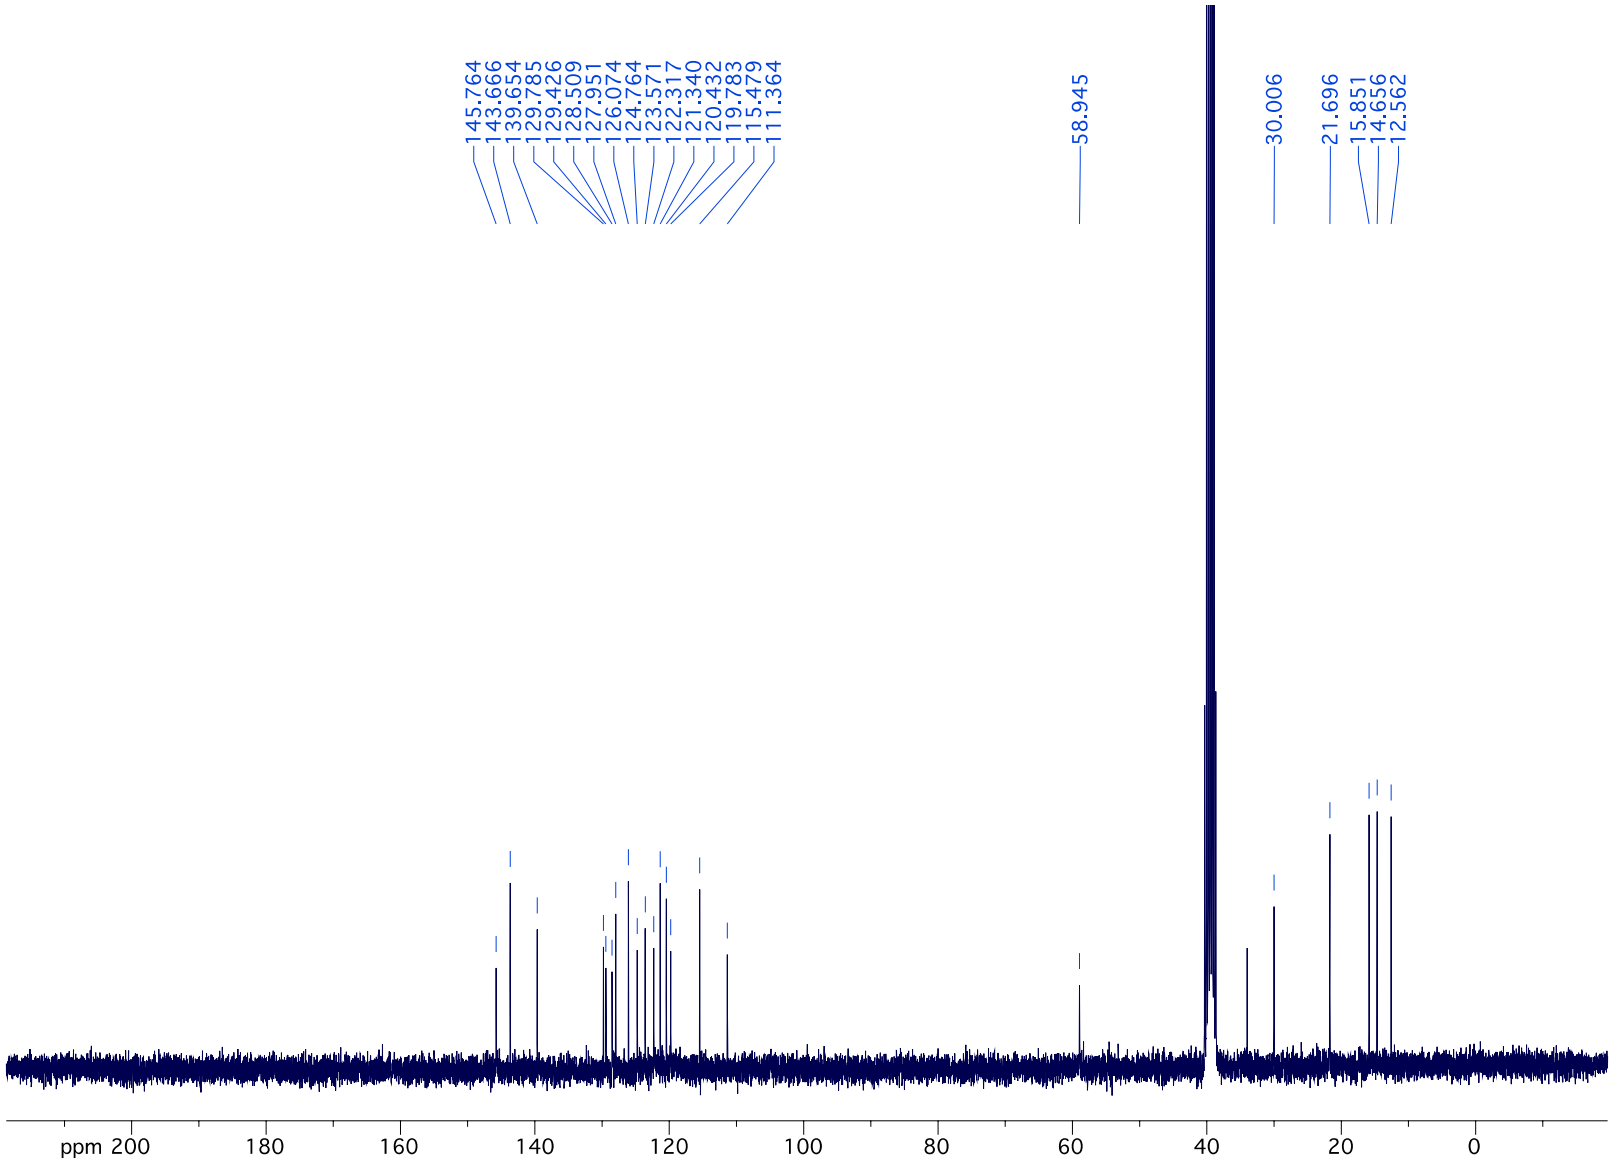



2-(5'-Cyanopentyl)isoellipticinium bromide **19** (water suppression in DMSO-*d*<sub>6</sub> at 300 MHz)

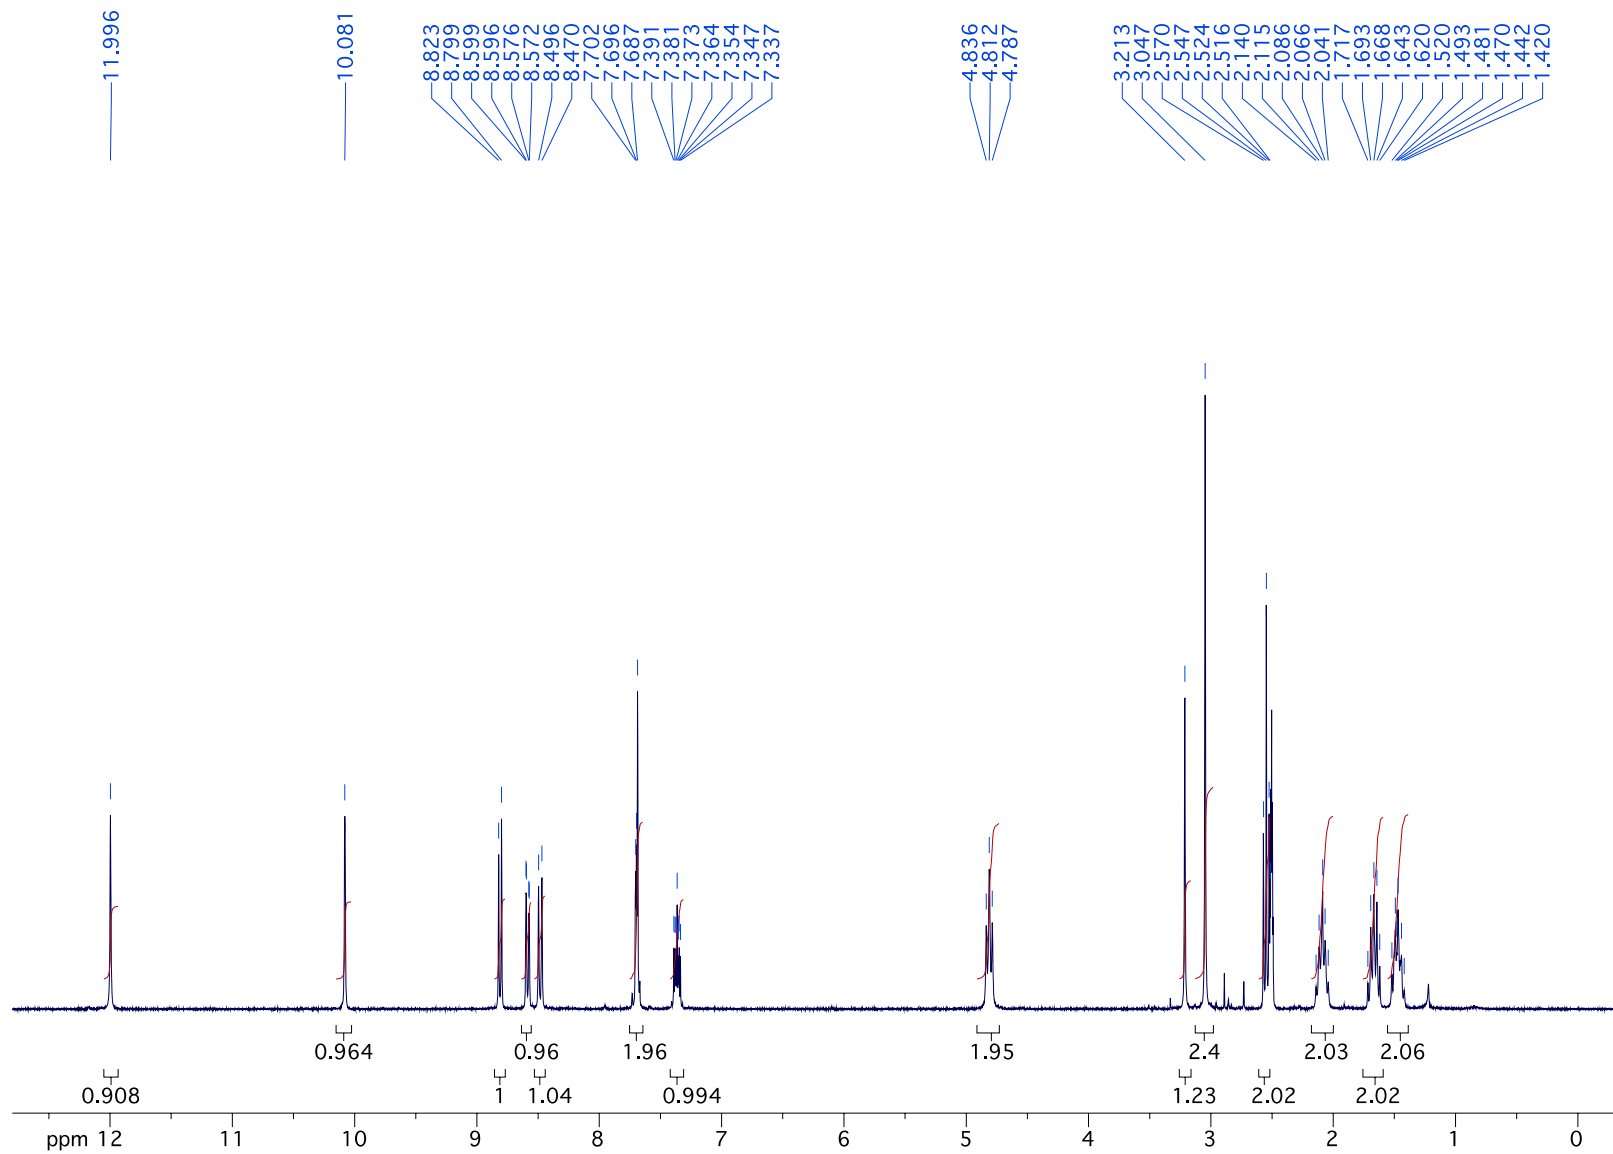

2-(5'-Cyanopentyl)isoellipticinium bromide **19** ( $^{13}\text{C}$  NMR spectrum in  $\text{DMSO-}d_6$  at 75.5 MHz)

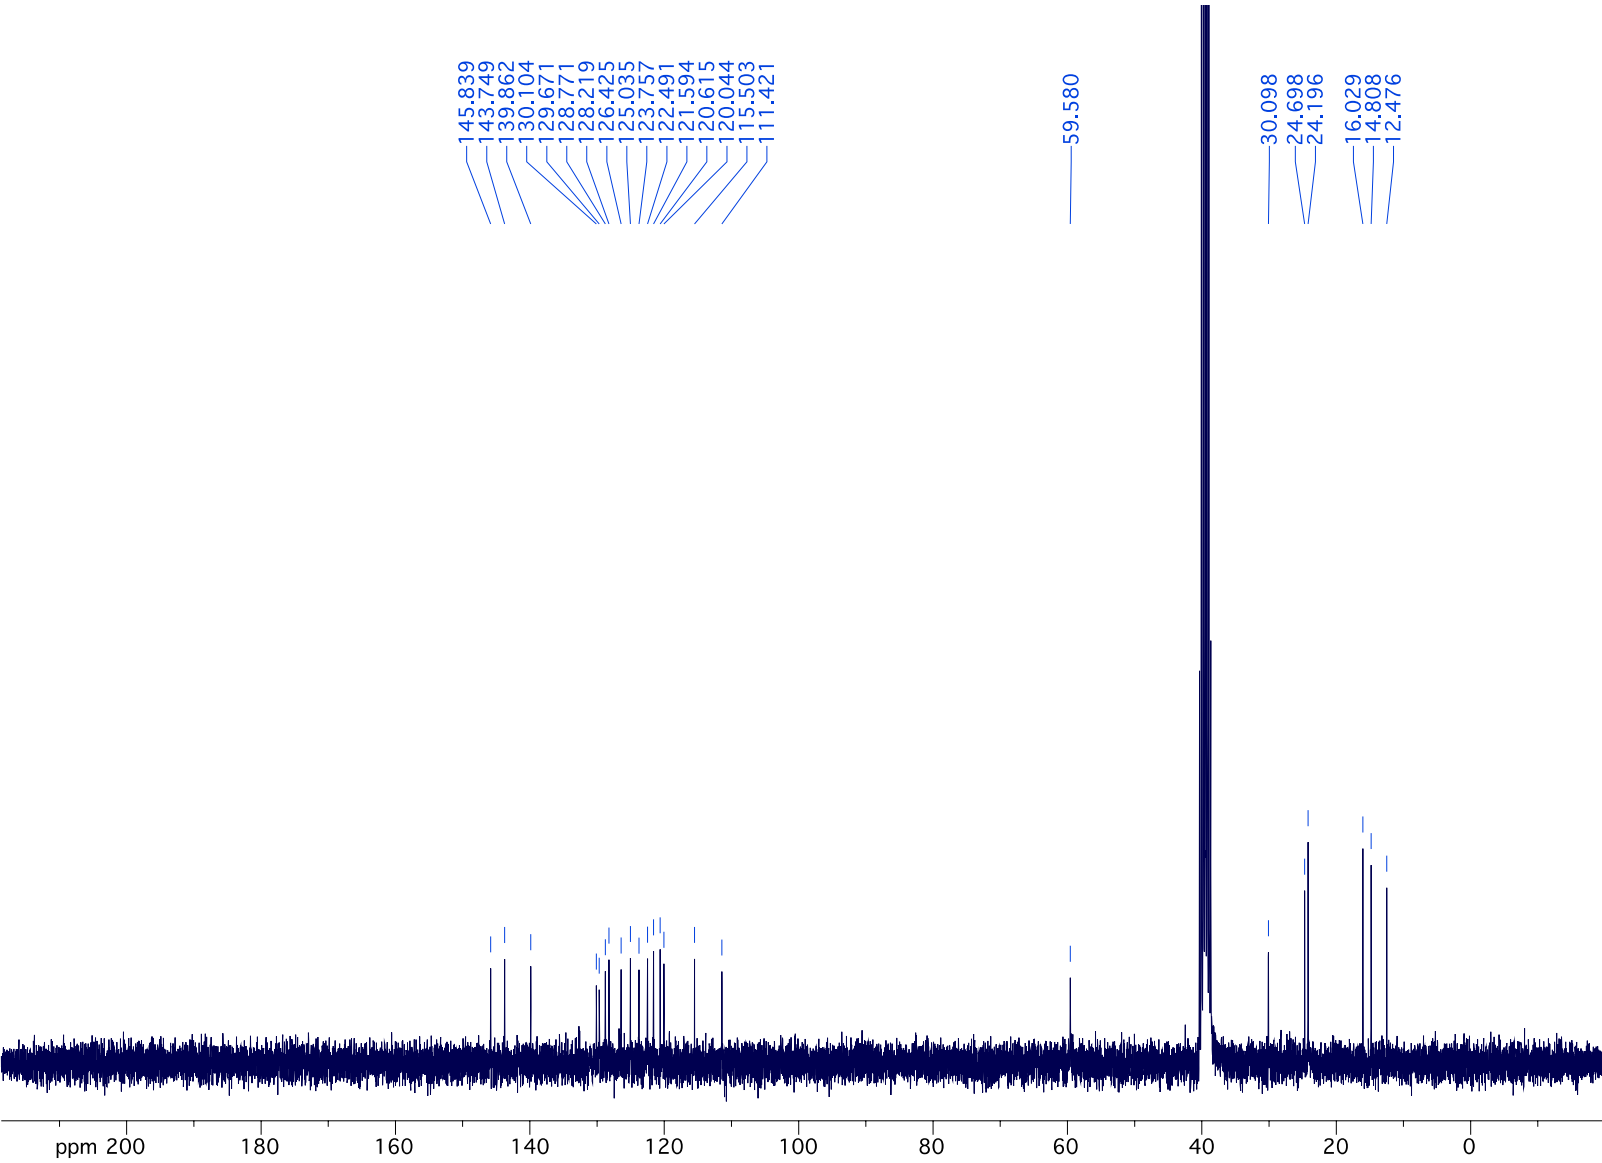

2-(5'-Carboxypentyl)isoellipticinium bromide **20** (1H NMR spectrum in DMSO-*d*<sub>6</sub> at 300 MHz)

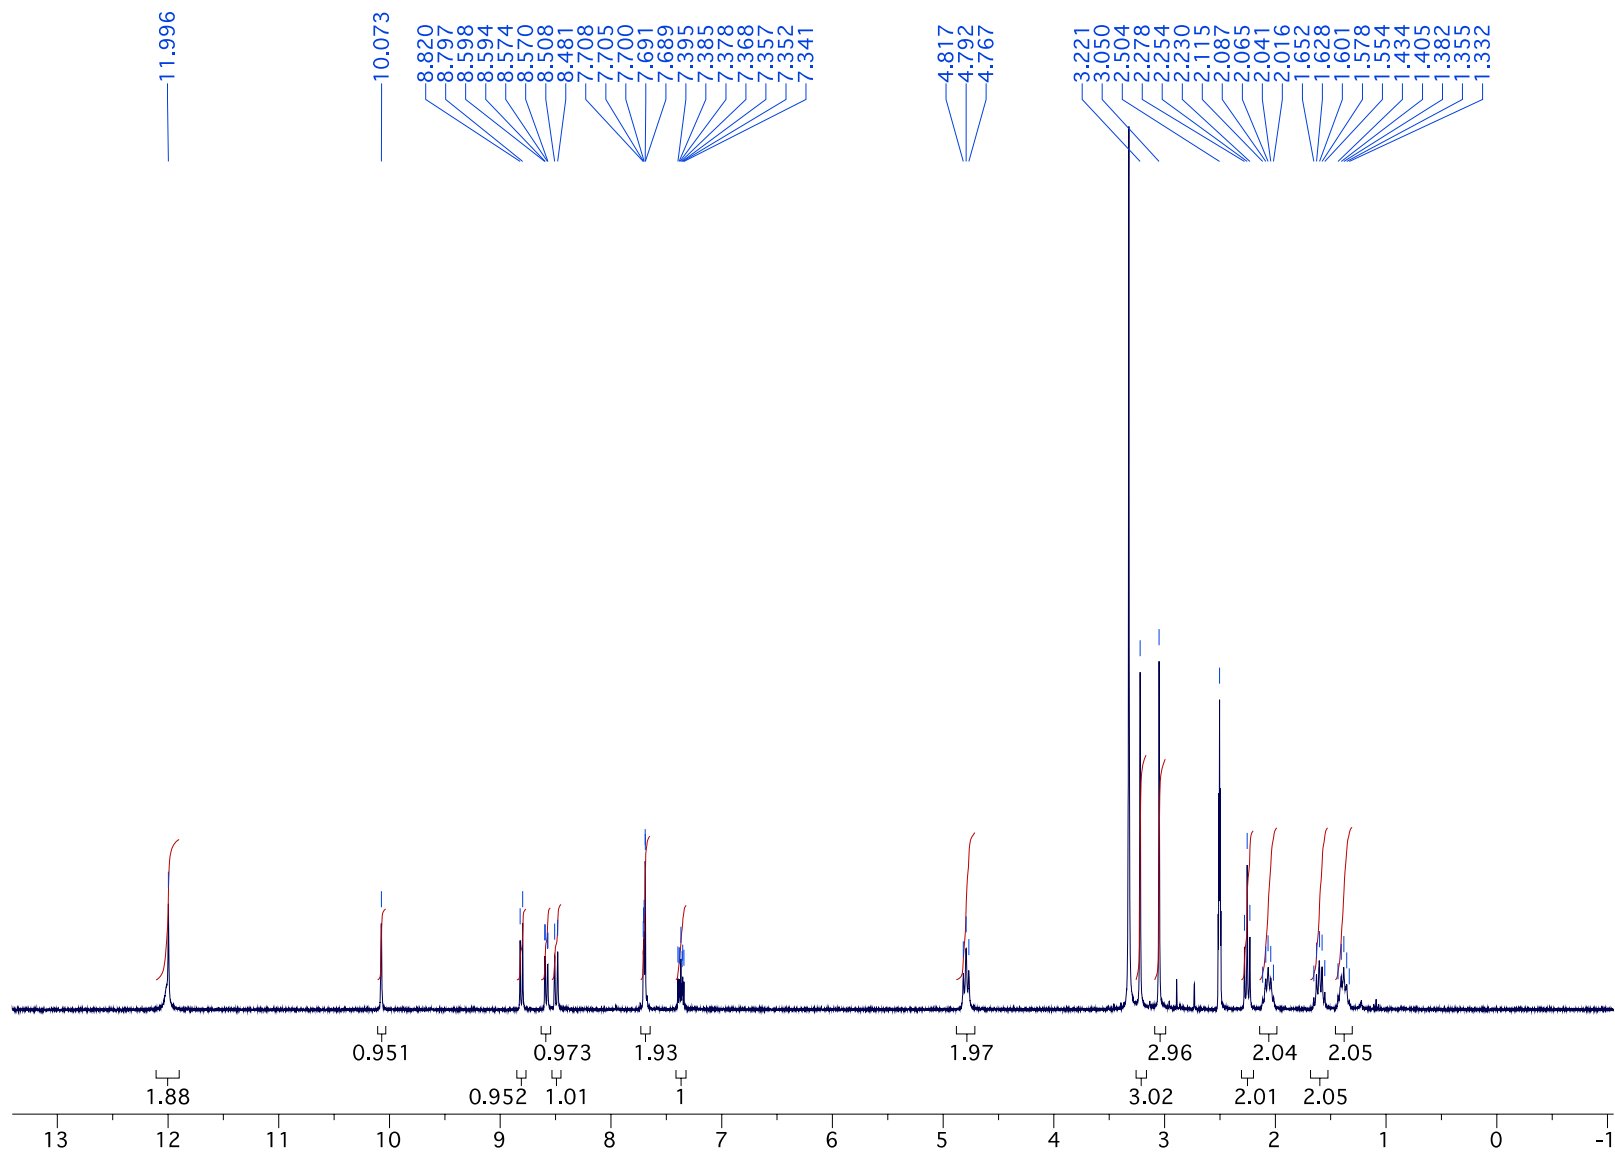

2-(5'-Carboxypentyl)isoellipticinium bromide **20** (<sup>13</sup>C NMR spectrum in DMSO-*d*<sub>6</sub> at 75.5 MHz)

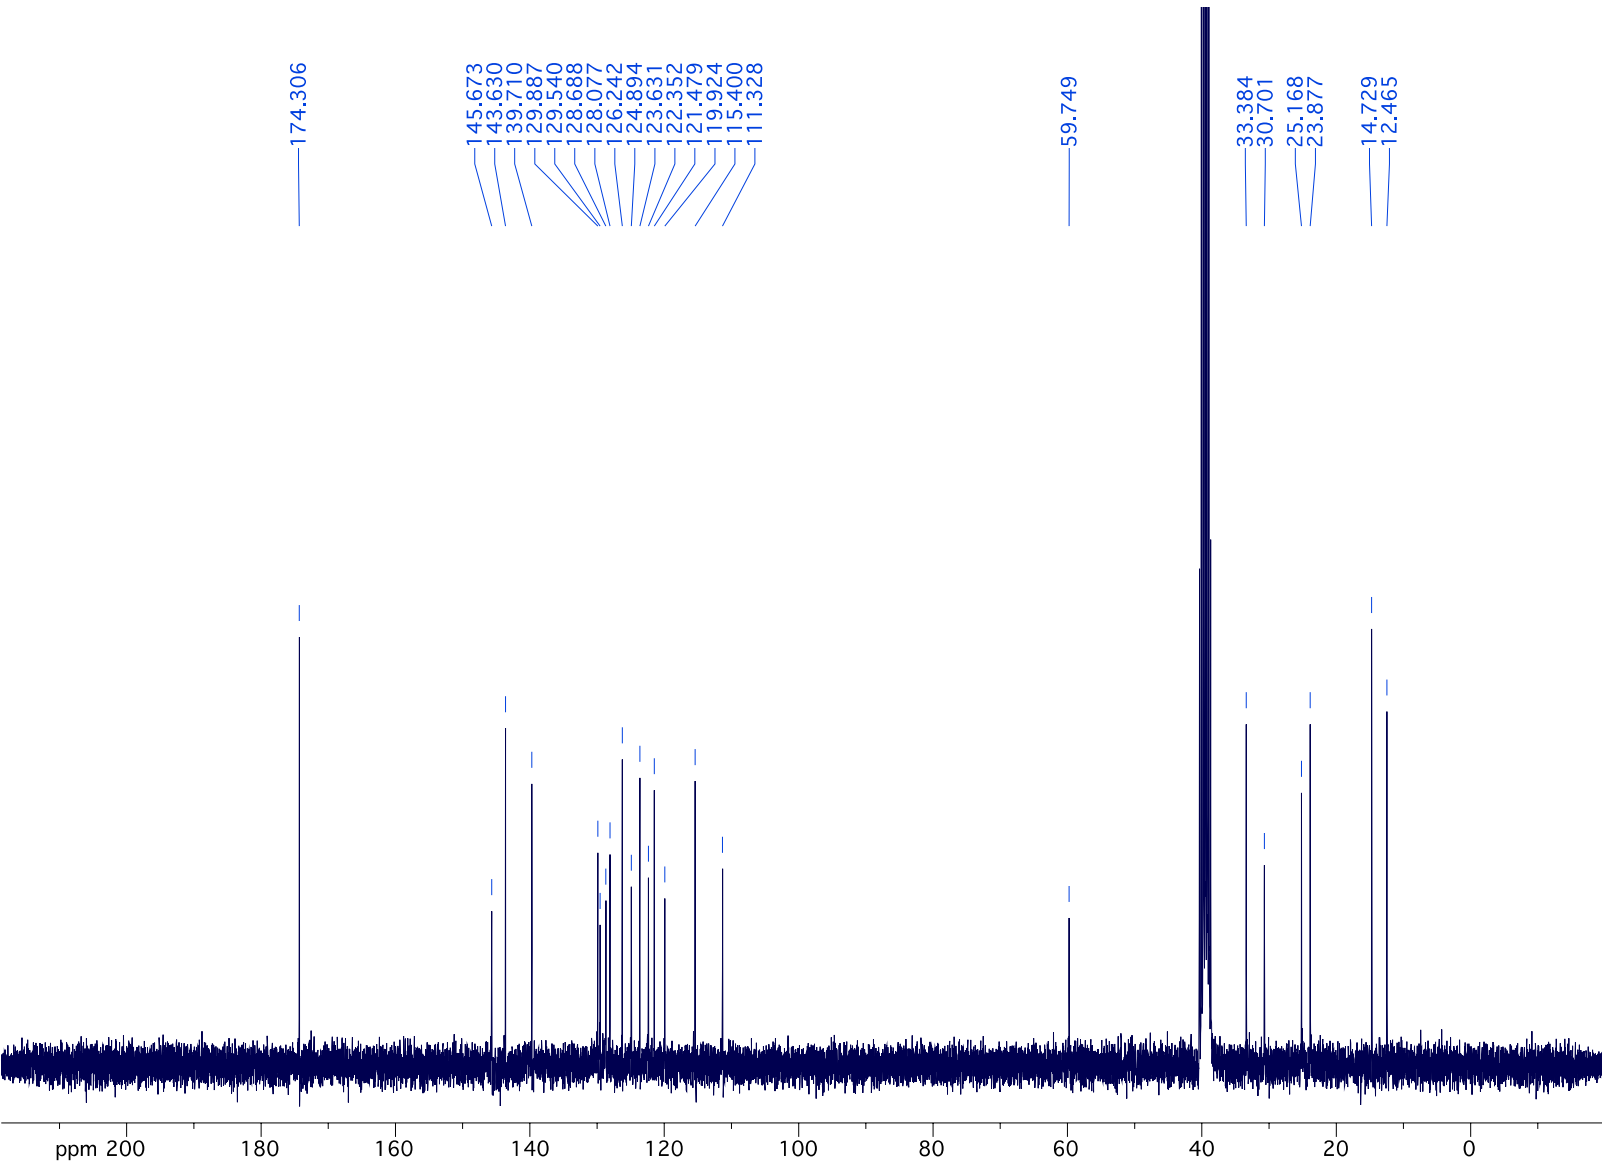

2-(6'-Carboxamidohexyl)isoellipticinium bromide **21** (<sup>1</sup>H NMR spectrum in DMSO-*d*<sub>6</sub> at 300 MHz)

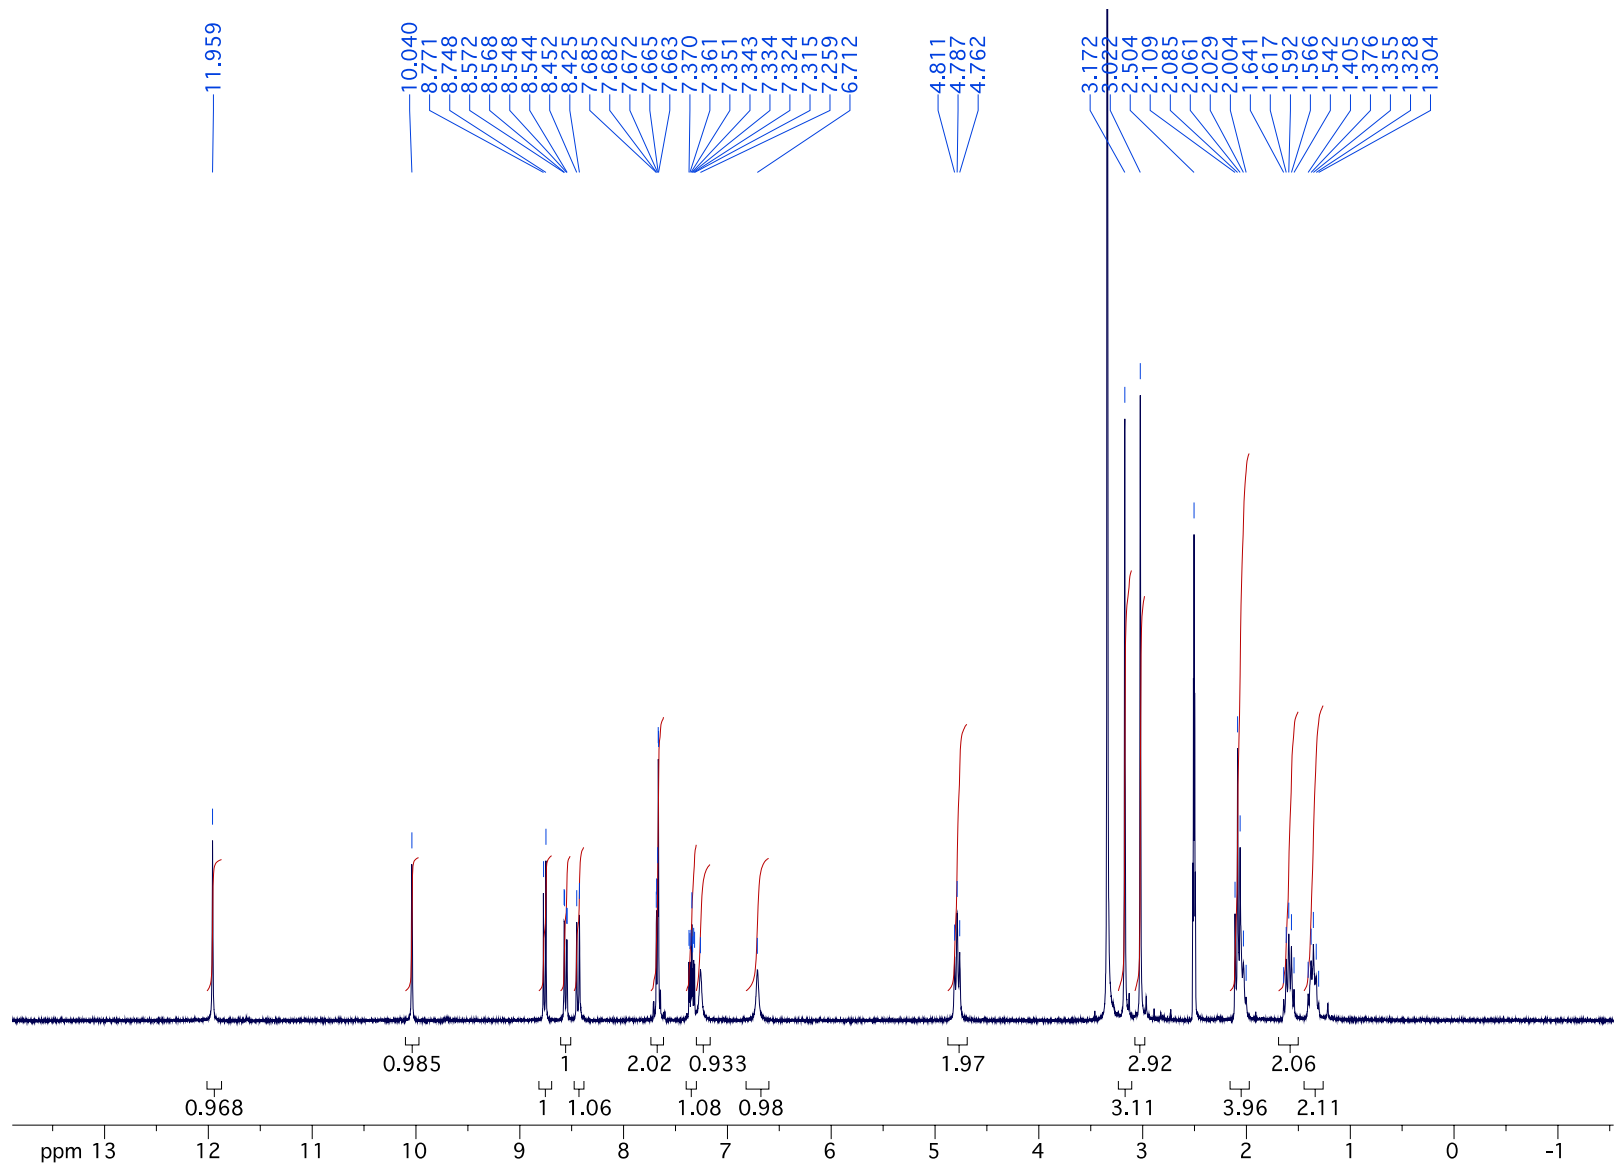

2-(6'-Carboxamidohexyl)isoellipticinium bromide **21** (<sup>13</sup>C NMR spectrum in DMSO-*d*<sub>6</sub> at 75.5 MHz)

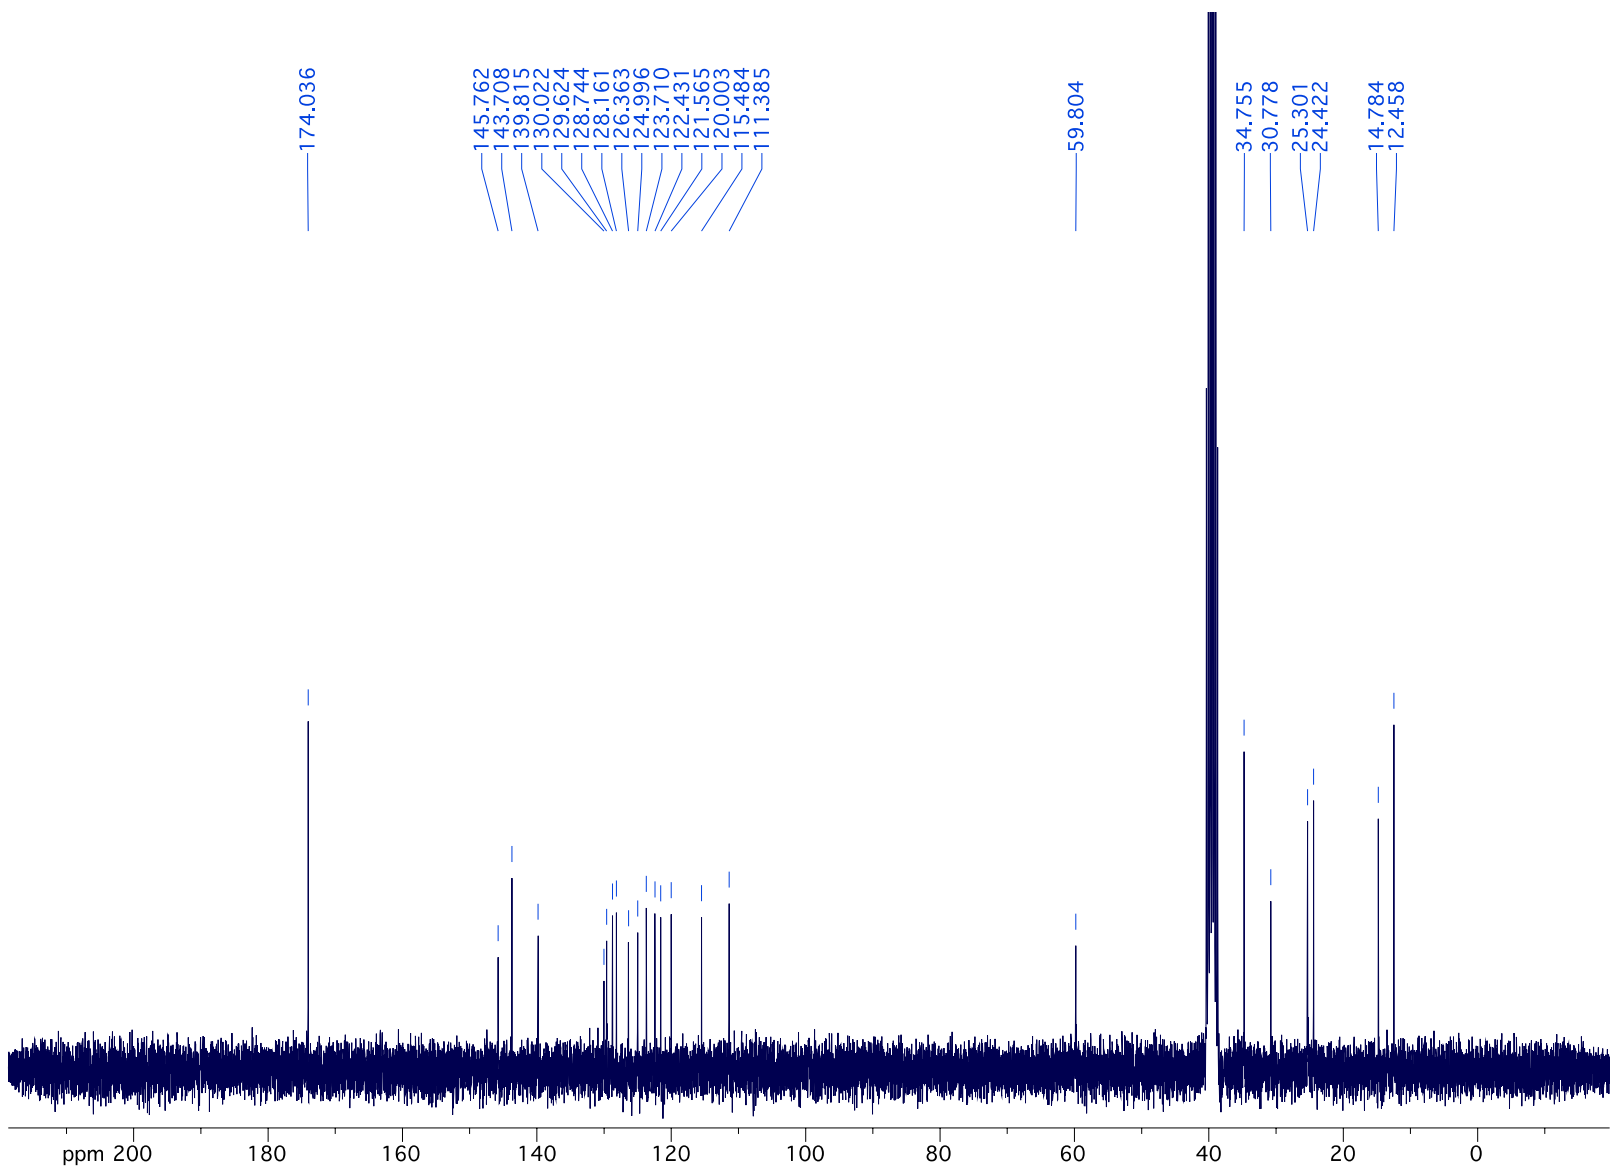

*N*<sup>2</sup>-(6'-Methylsulfonamido-6'-oxohexyl)isoellipticinium bromide **22** (<sup>1</sup>H NMR spectrum in DMSO-*d*<sub>6</sub> at 300 MHz)

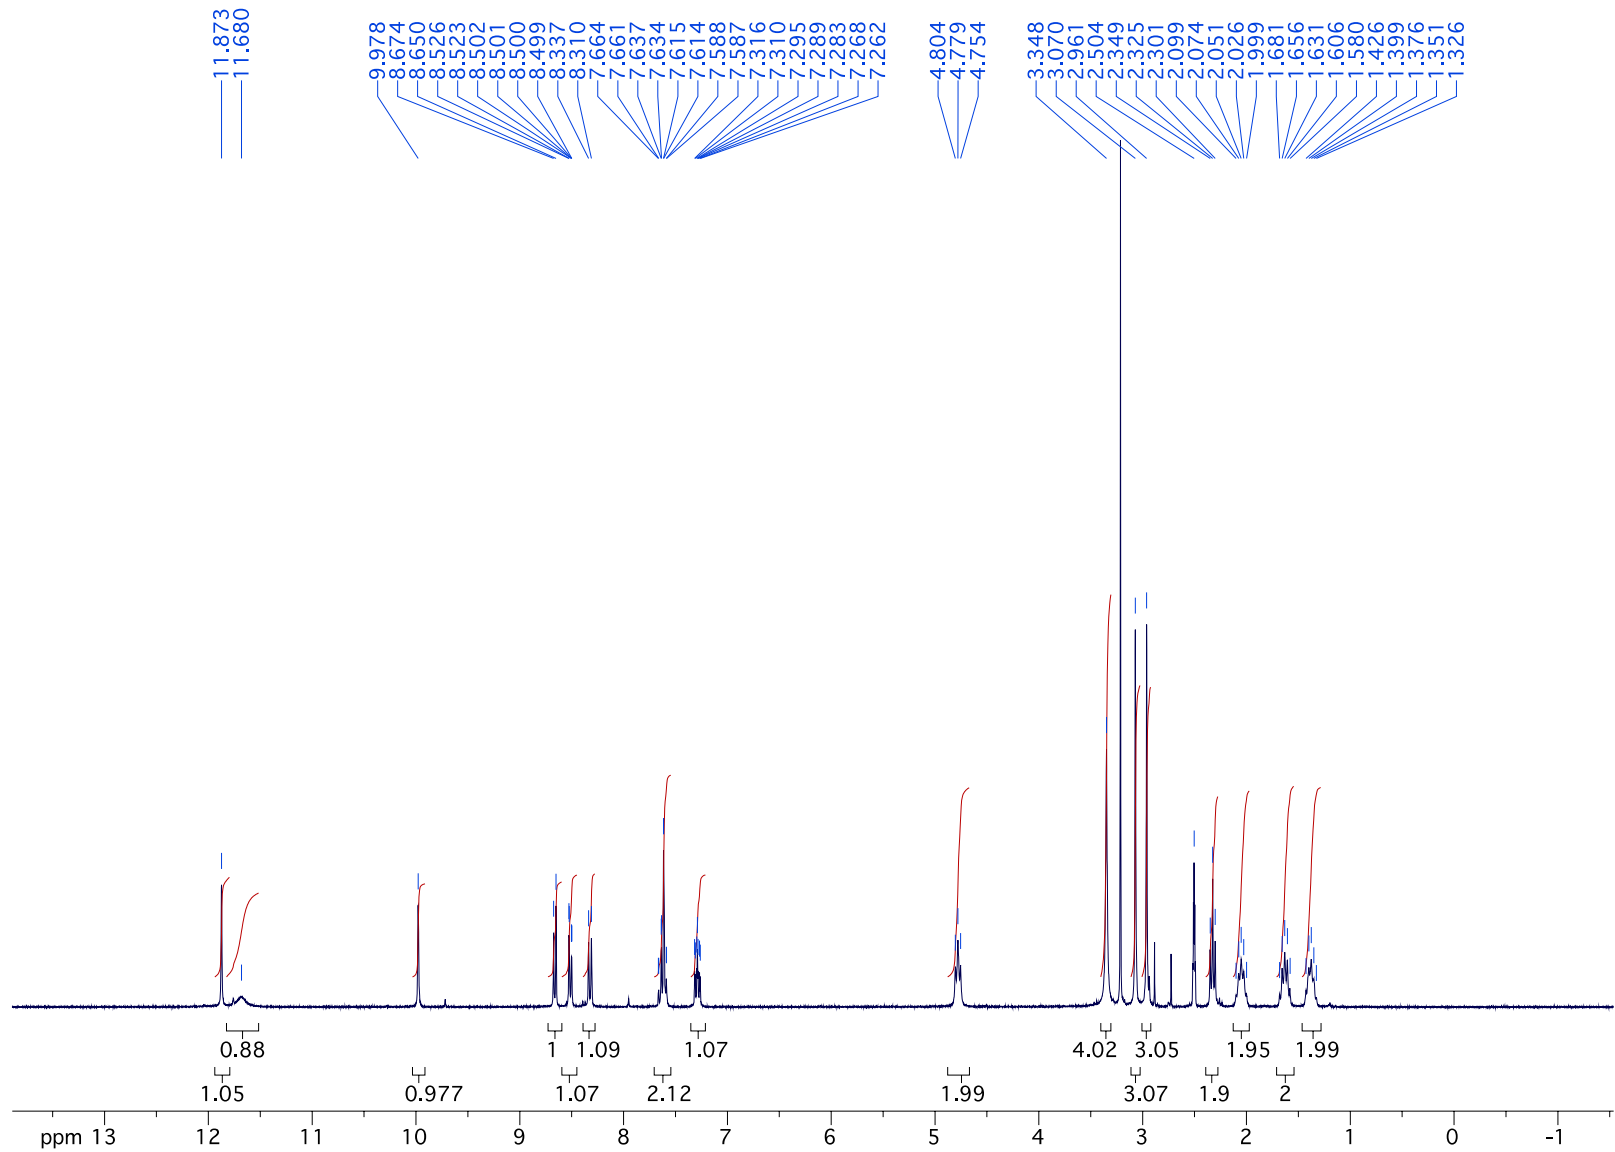

*N*<sup>2</sup>-(6'-Methylsulfonamido-6'-oxohexyl)isoellipticinium bromide **22** (<sup>13</sup>C NMR spectrum in DMSO-*d*<sub>6</sub> at 75.5 MHz)

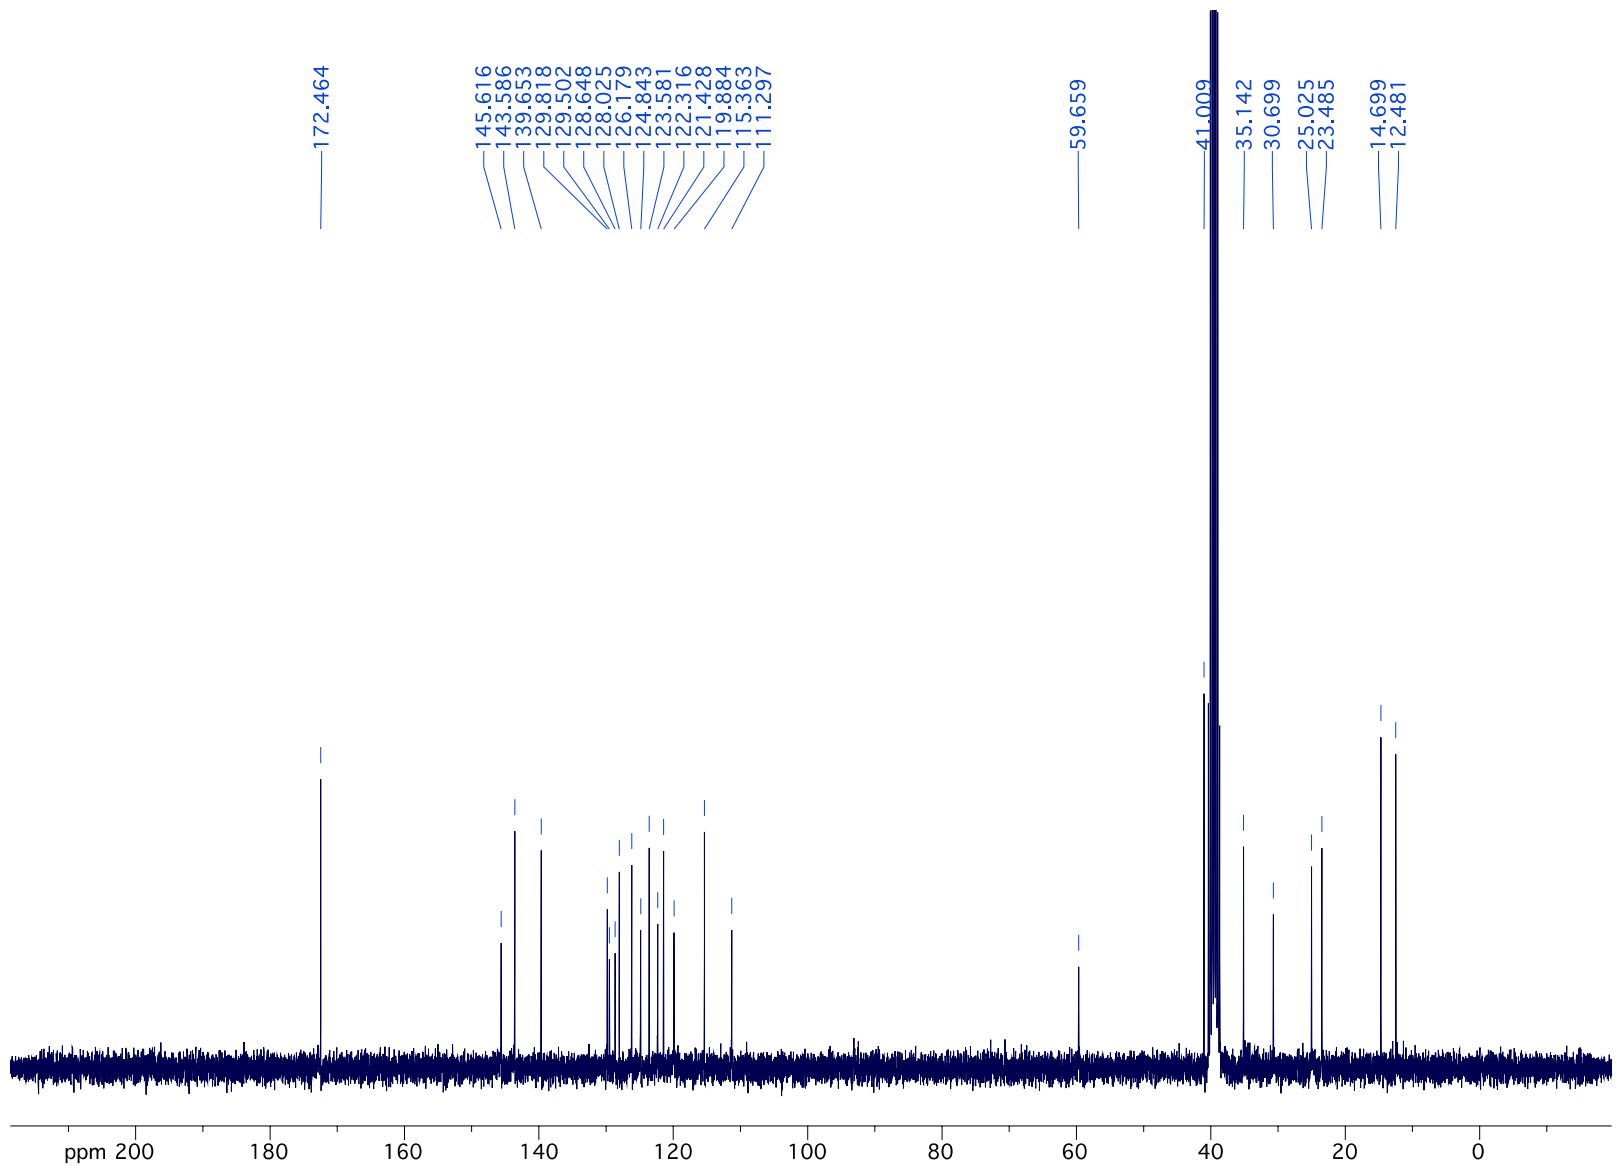



2-(5'-Carboxypentyl)-7-formylisoellipticinium bromide **23** ( $^1\text{H}$  NMR spectrum in  $\text{DMSO}-d_6$  at 300 MHz, with trace DMF)

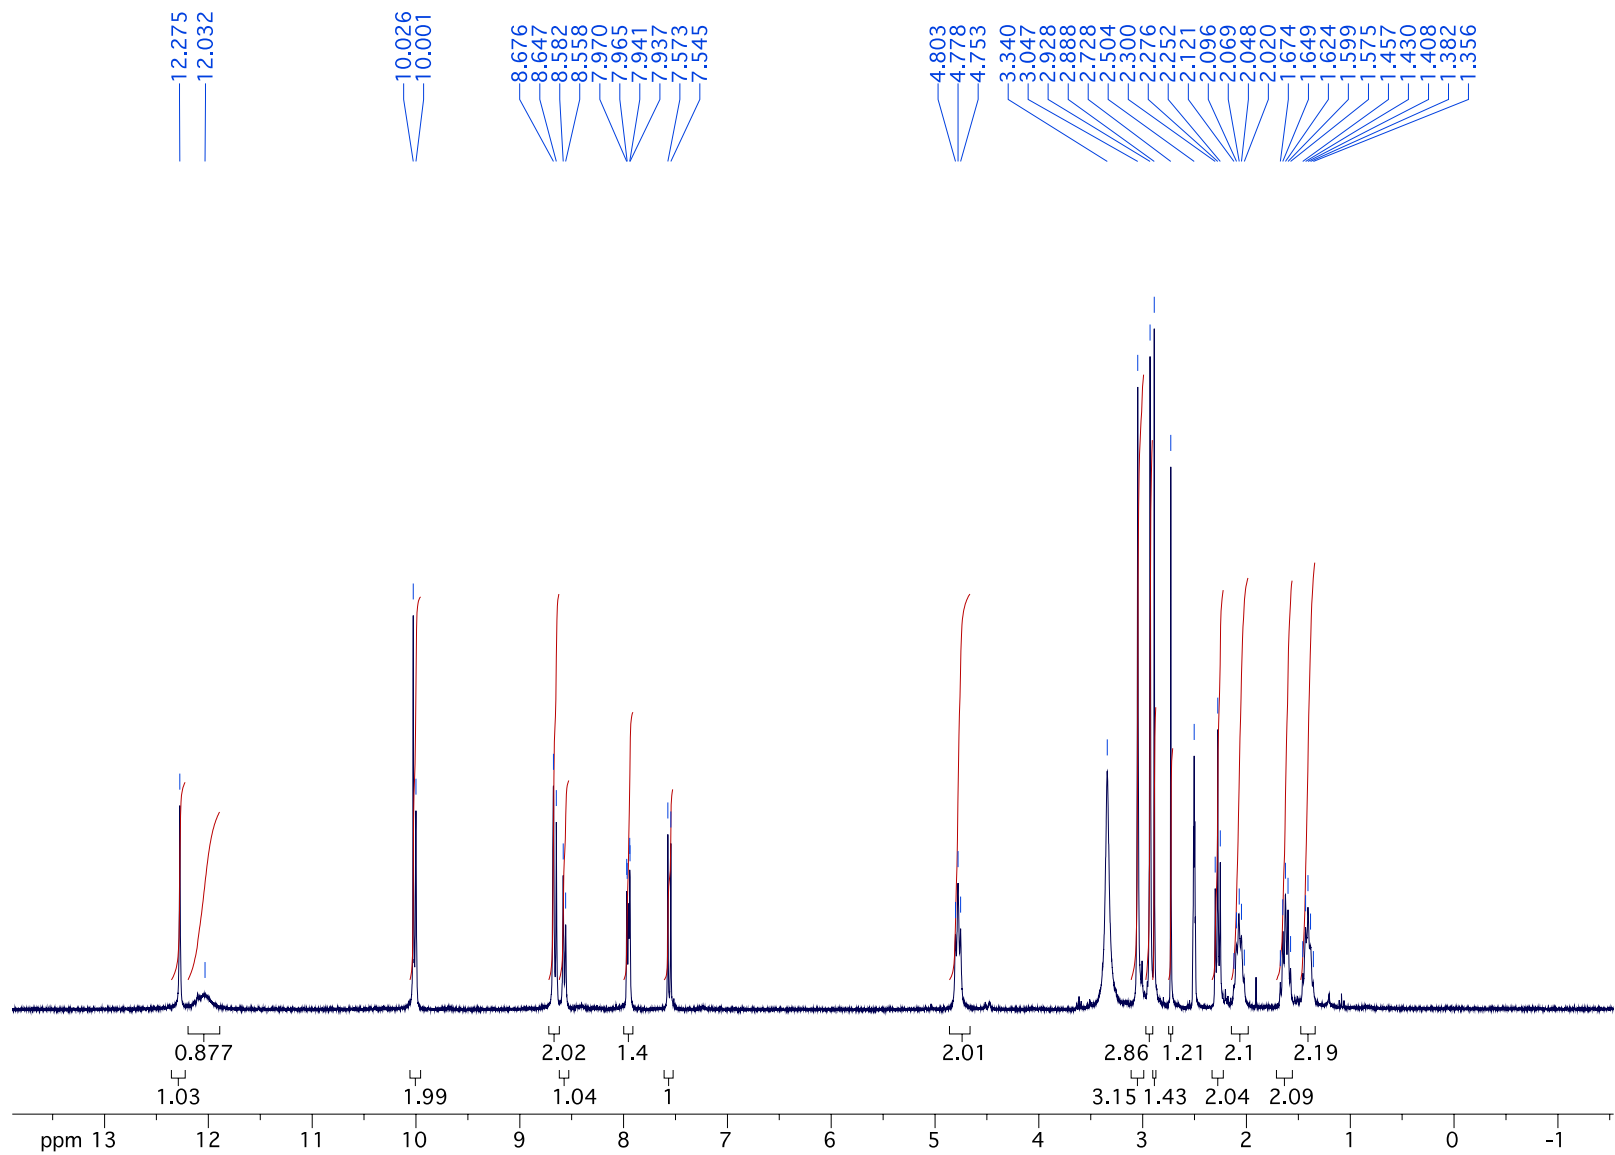

2-(5'-Carboxypentyl)-7-formylisoellipticinium bromide **23** (<sup>13</sup>C NMR spectrum in DMSO-*d*<sub>6</sub> at 75.5 MHz, with trace DMF)

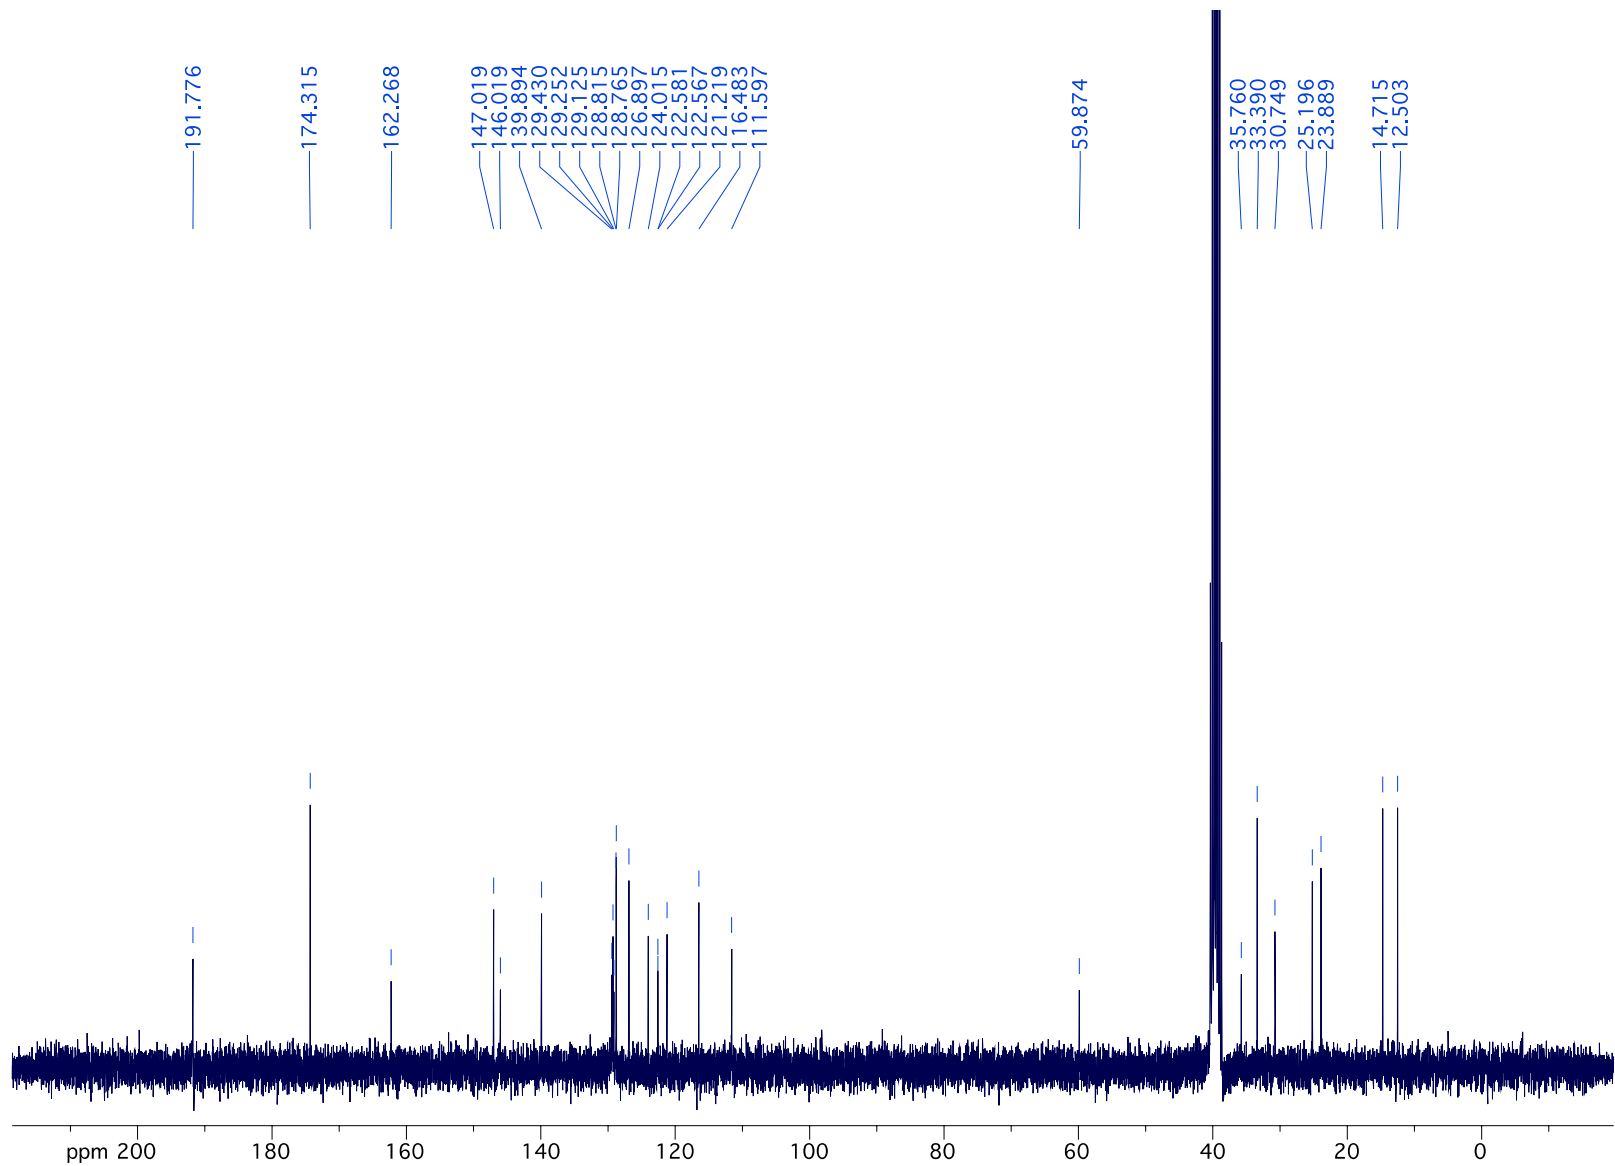

2-(5'-Cyanopentyl)-7-formylisoellipticinium bromide **24** (<sup>1</sup>H NMR spectrum in DMSO-*d*<sub>6</sub> at 300 MHz)

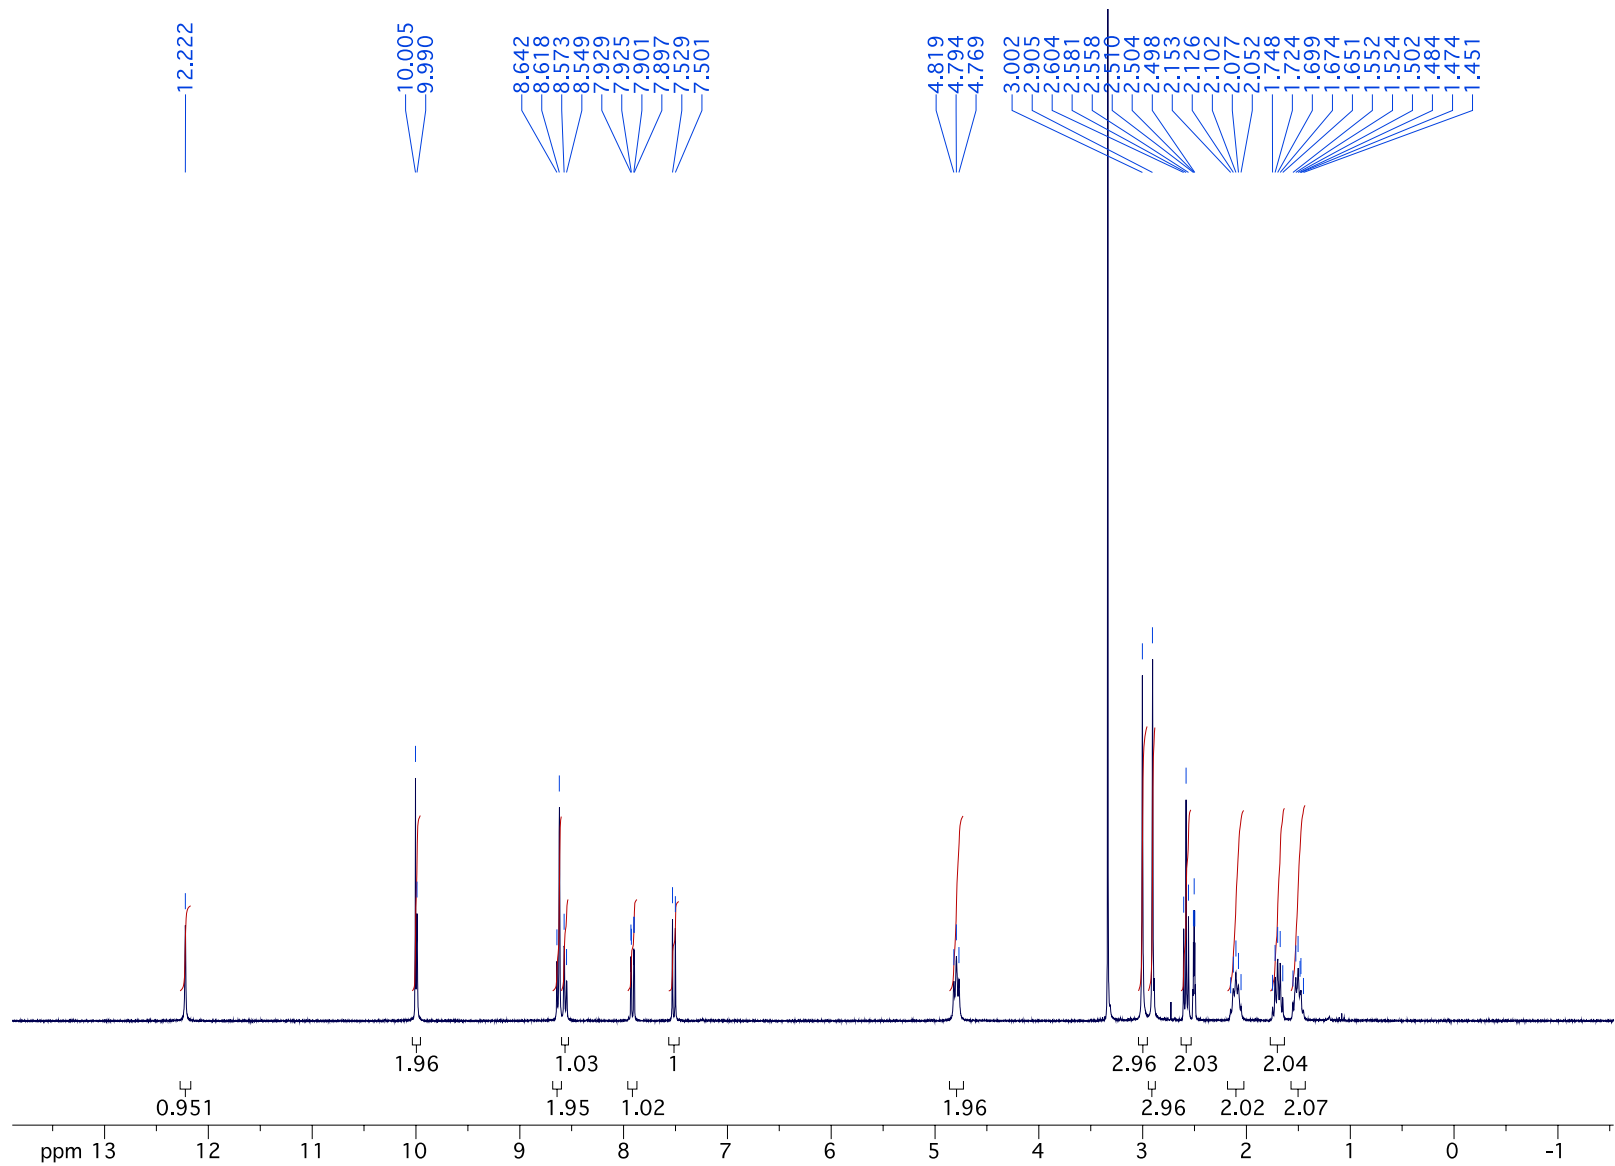

2-(5'-Cyanopentyl)-7-formylisoellipticinium bromide **24** [<sup>13</sup>C NMR spectrum in DMSO-*d*<sub>6</sub> at 150.9 MHz, with trace dimethyl sulfoxide (undeuterated) at 40.5 ppm]

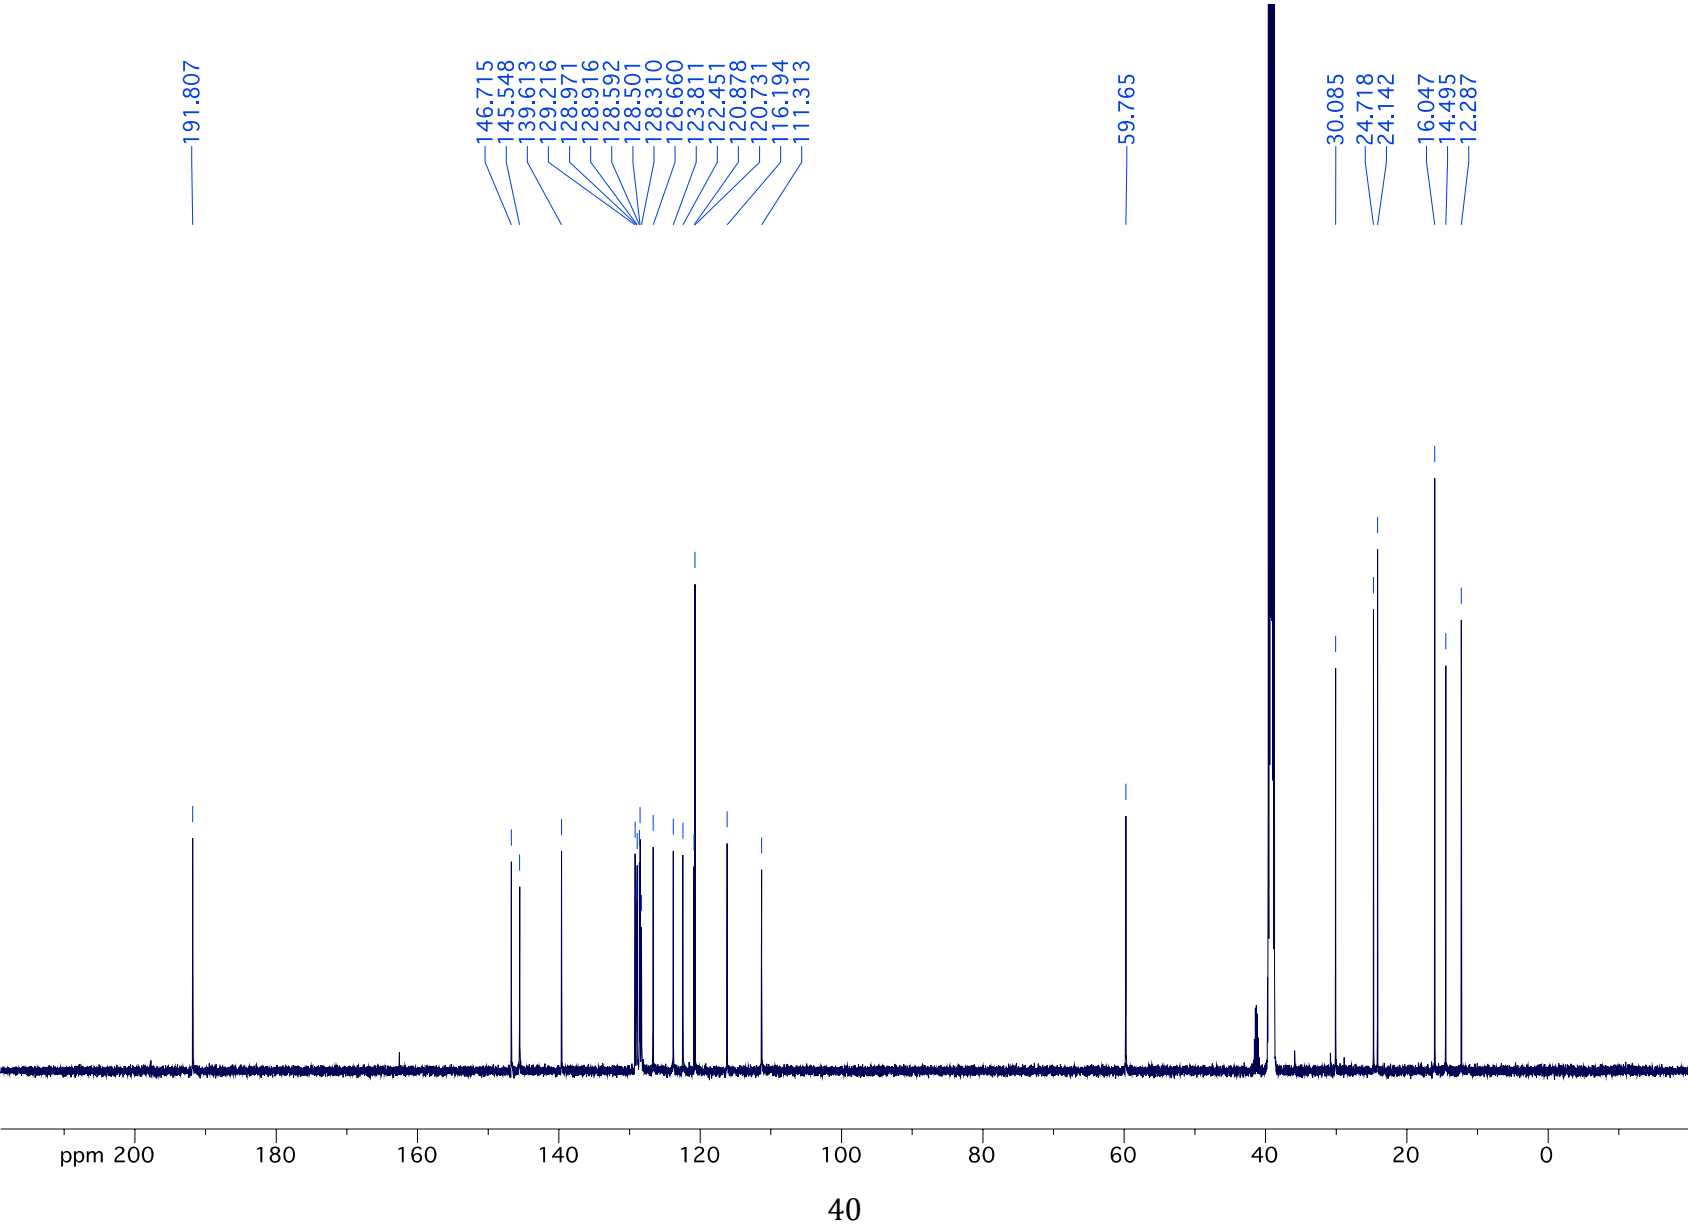

2-(6'-Carboxamidohexyl)-7-formylisoellipticinium bromide **25** (<sup>1</sup>H NMR spectrum in DMSO-*d*<sub>6</sub> at 300 MHz)

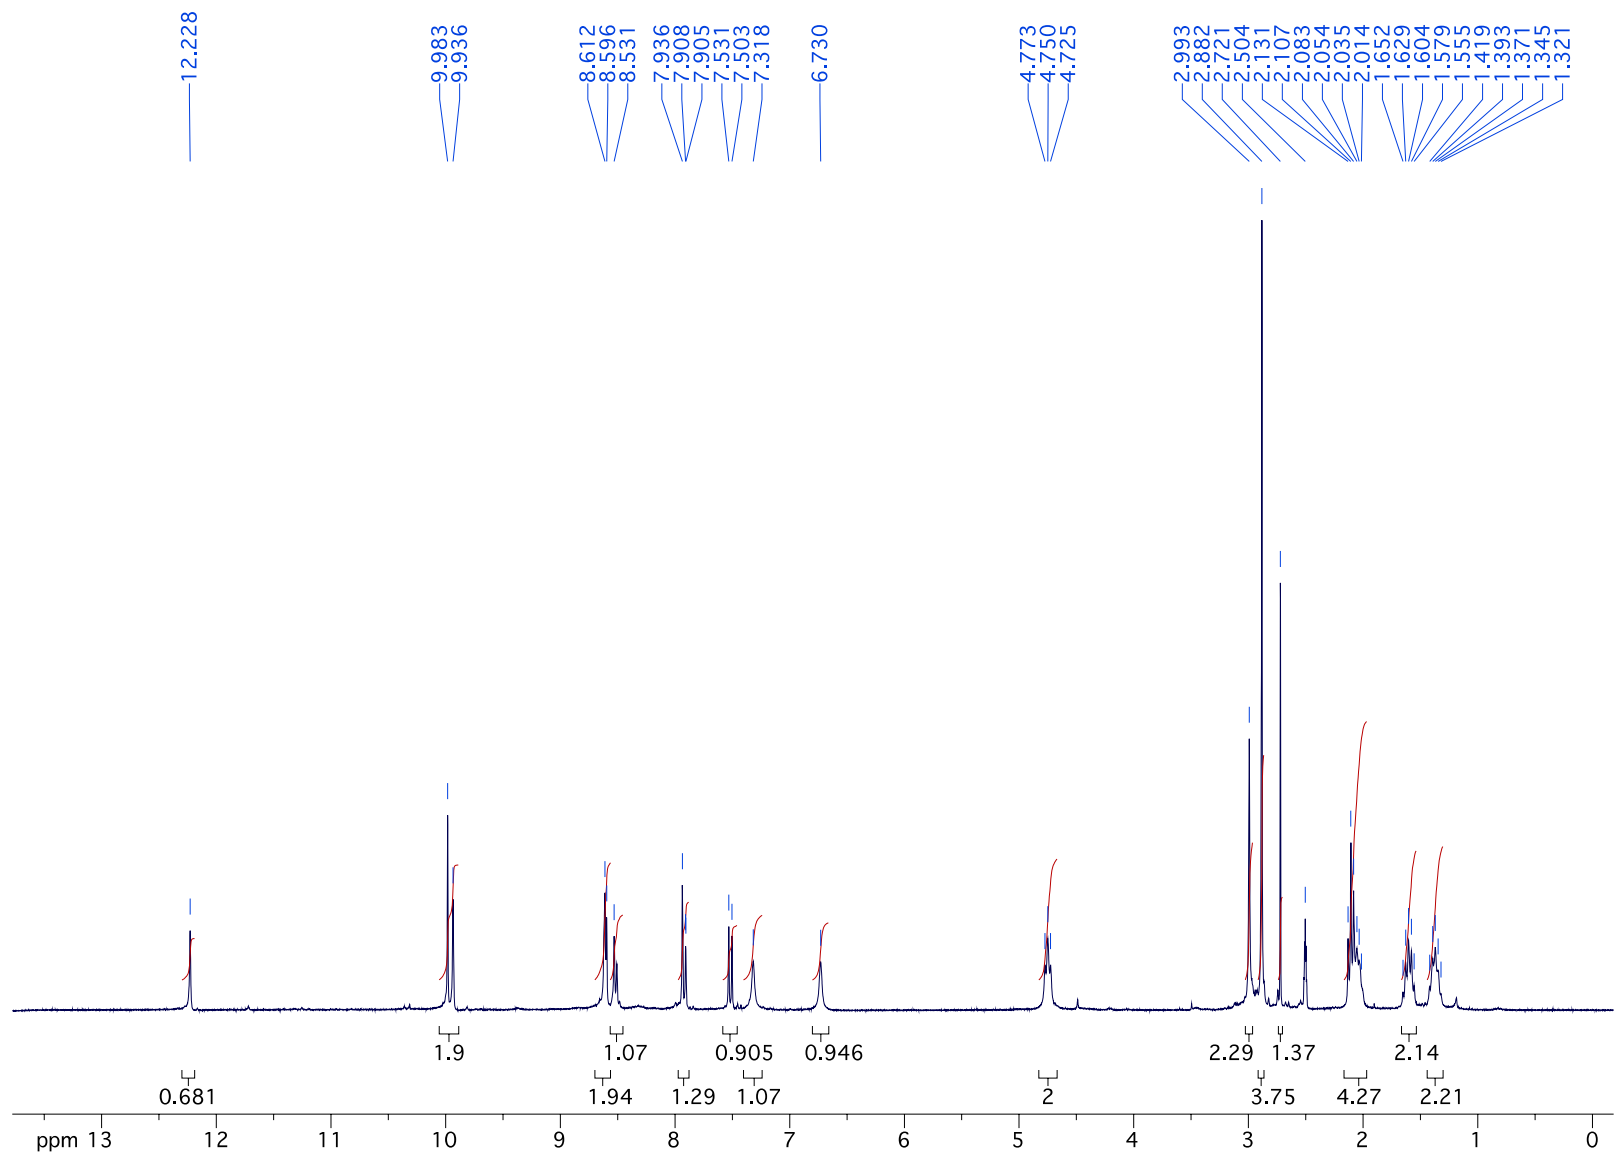

2-(6'-Carboxamidohexyl)-7-formylisoellipticinium bromide **25** ( $^{13}\text{C}$  NMR spectrum in  $\text{DMSO-}d_6$  at 75.5 MHz)

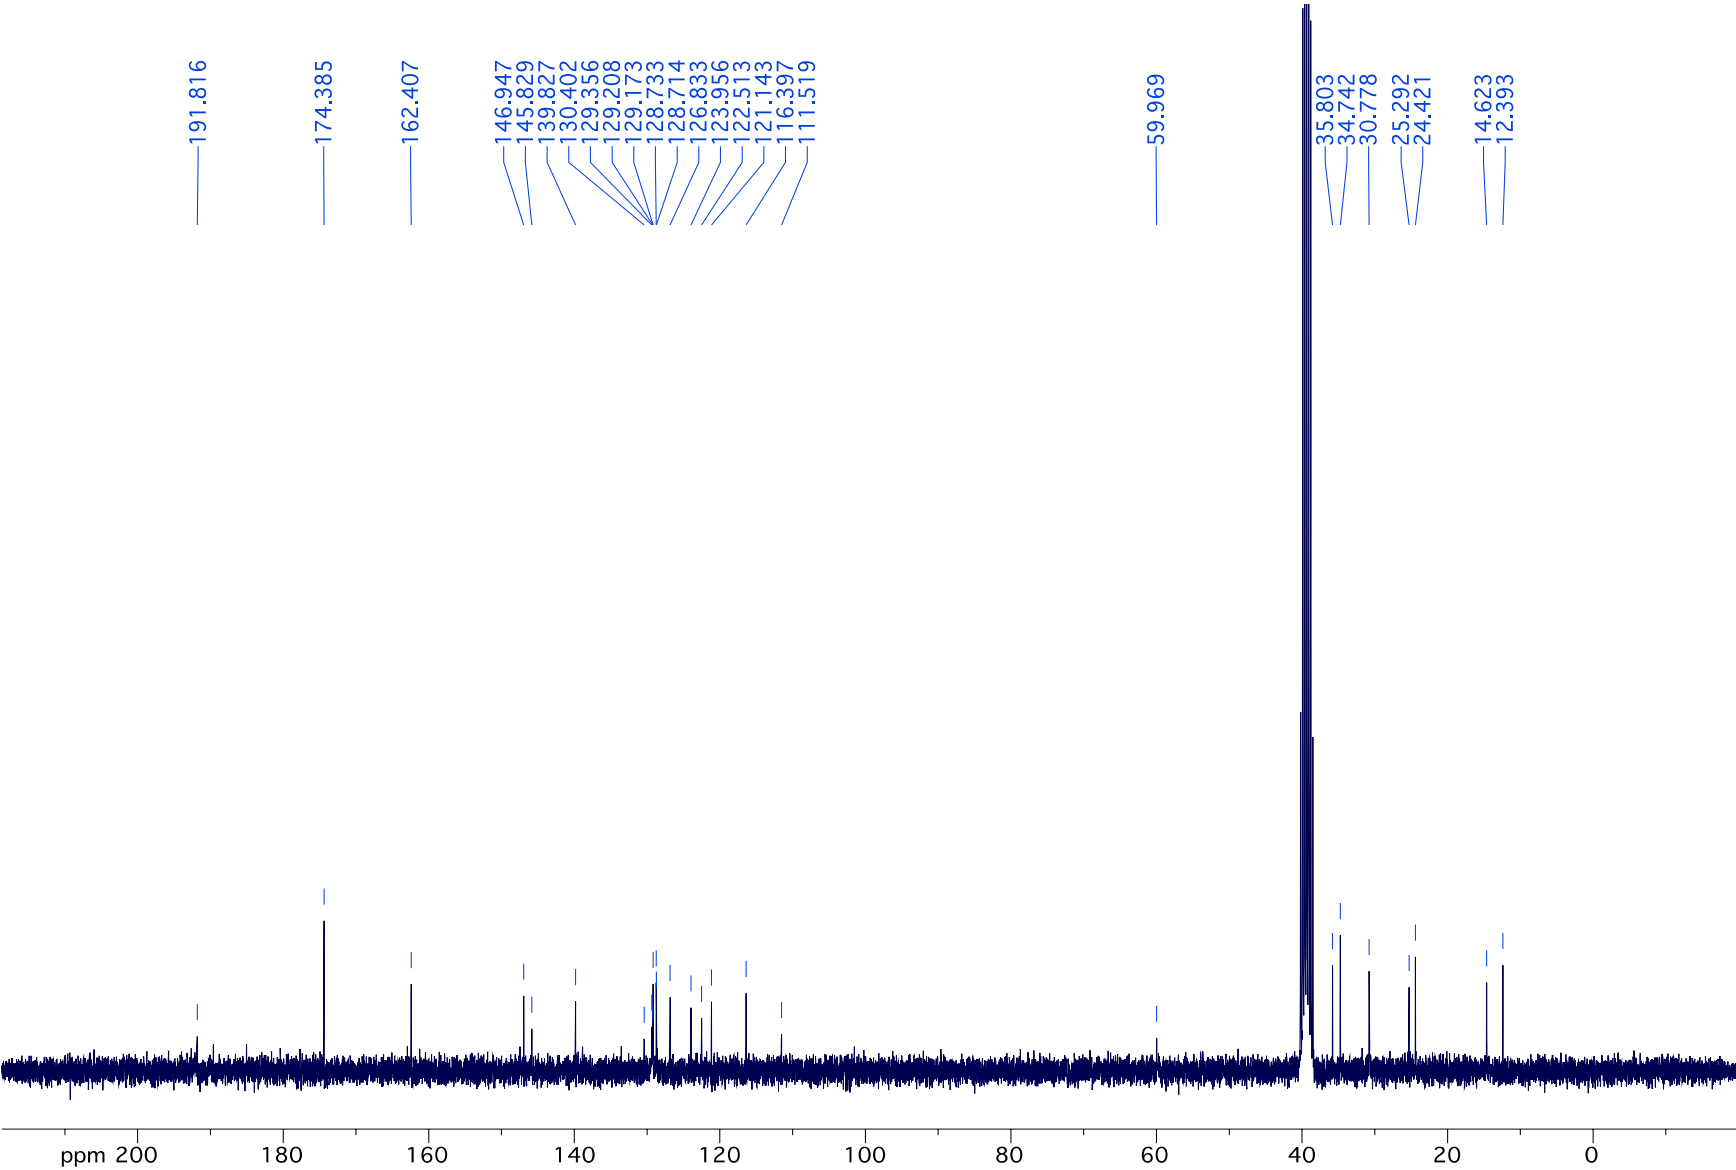

7-Formyl-*N*<sup>2</sup>-(6'-methylsulfonamido-6'-oxohexyl)isoellipticinium bromide **26** (<sup>1</sup>H NMR spectrum in DMSO-*d*<sub>6</sub> at 300 MHz)

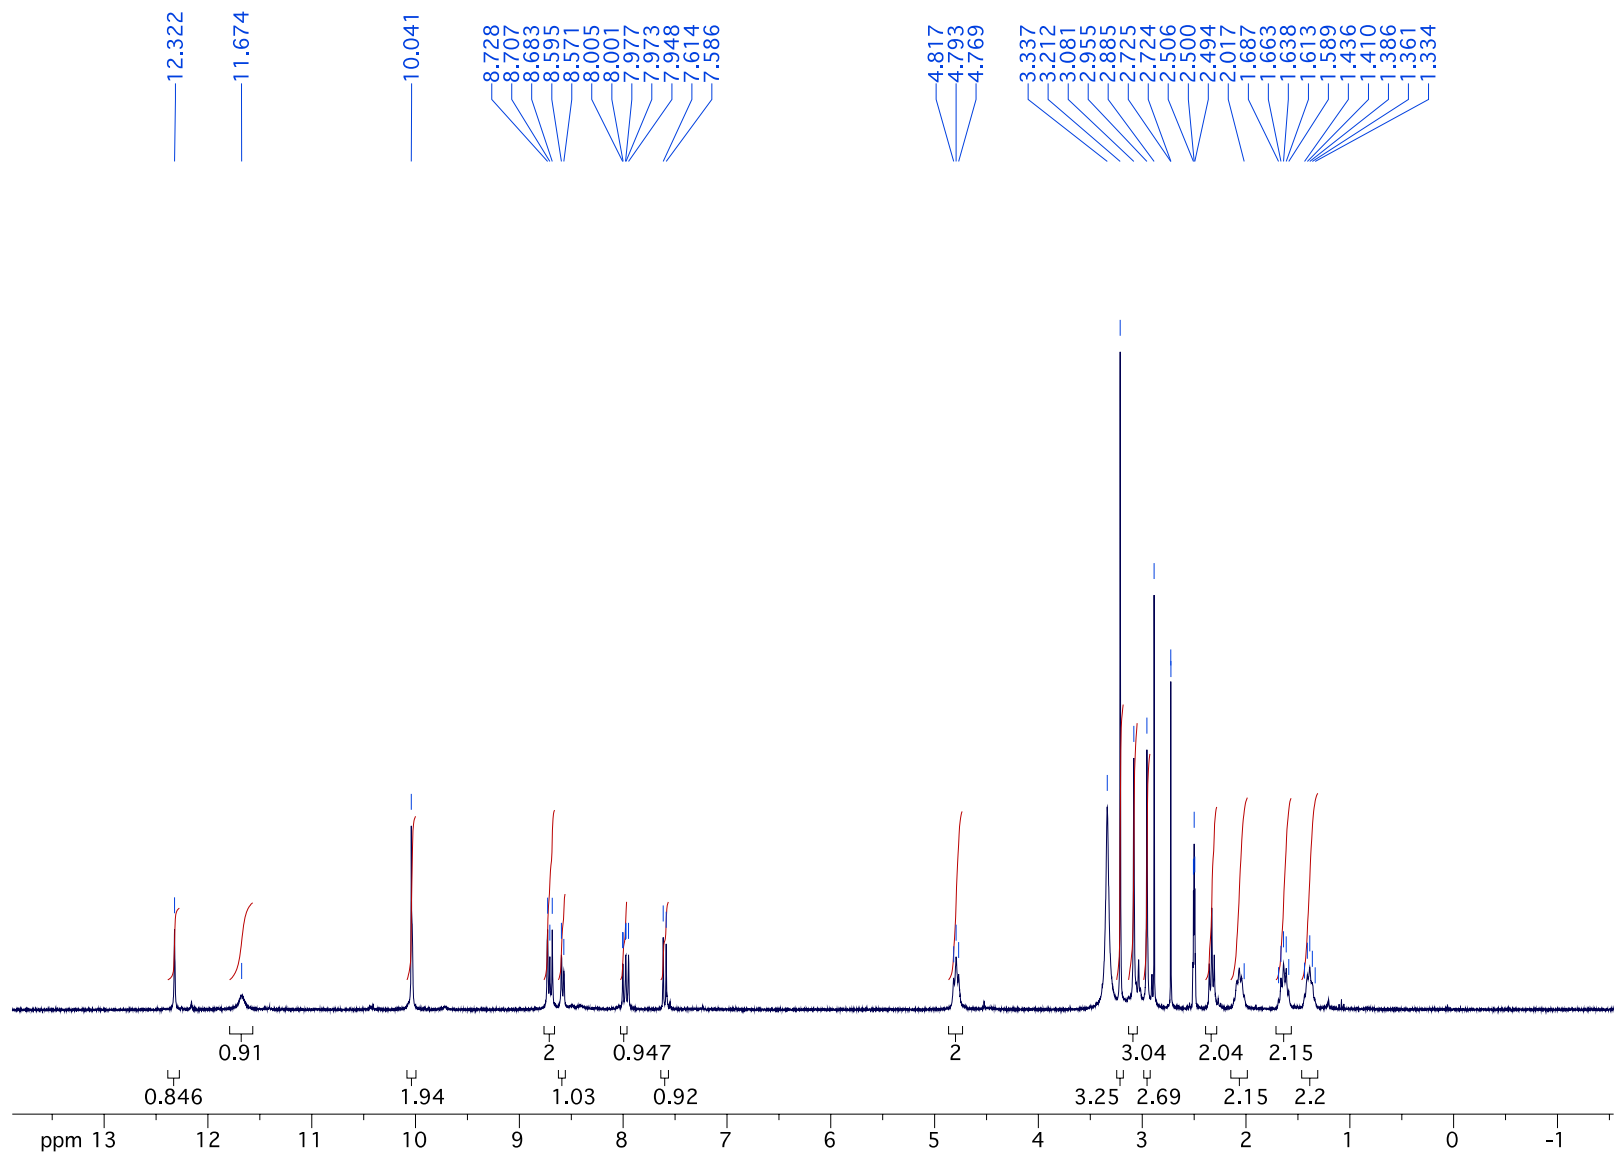

7-Formyl-*N*<sup>2</sup>-(6'-methylsulfonamido-6'-oxohexyl)isoellipticinium bromide **26** (<sup>13</sup>C NMR spectrum in DMSO-*d*<sub>6</sub> at 75.5 MHz)

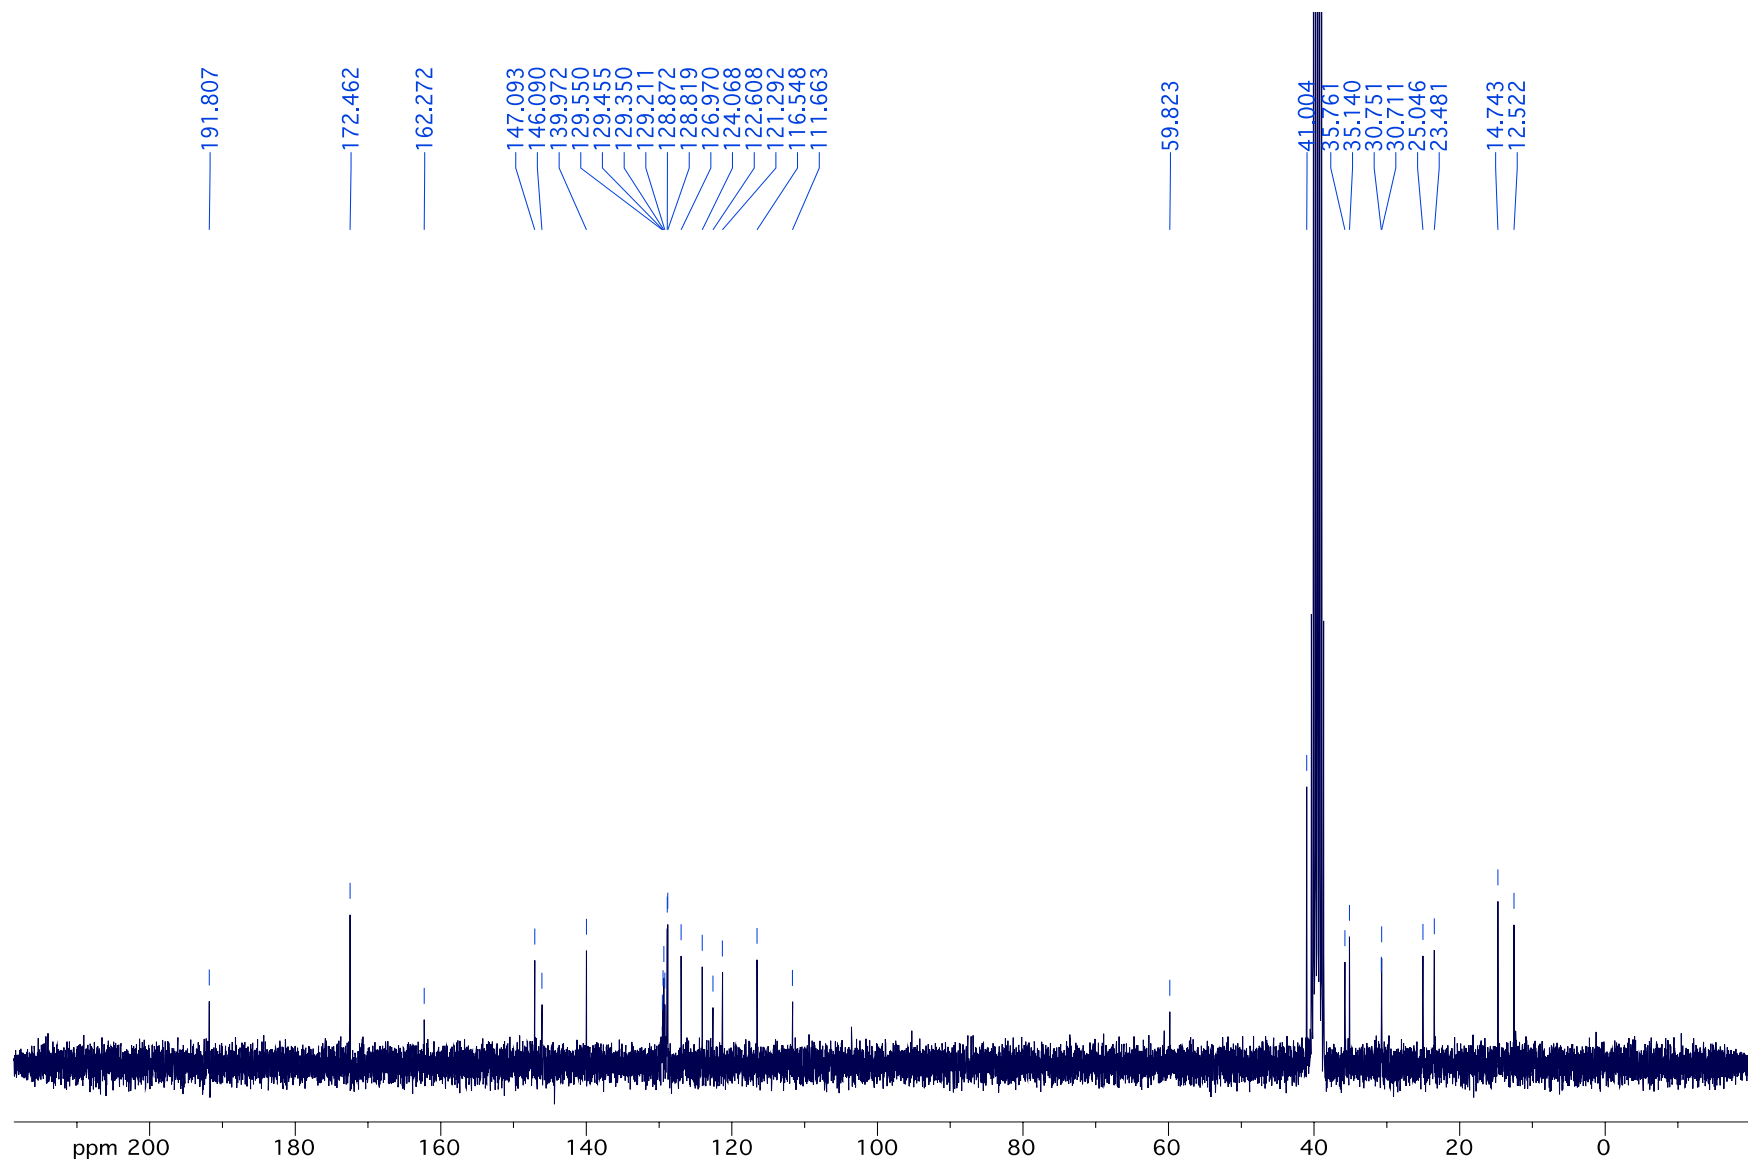



2-(5'-Carboxypentyl)-7-hydroxyisoellipticinium bromide **27** (<sup>1</sup>H NMR spectrum in DMSO-*d*<sub>6</sub> at 300 MHz)

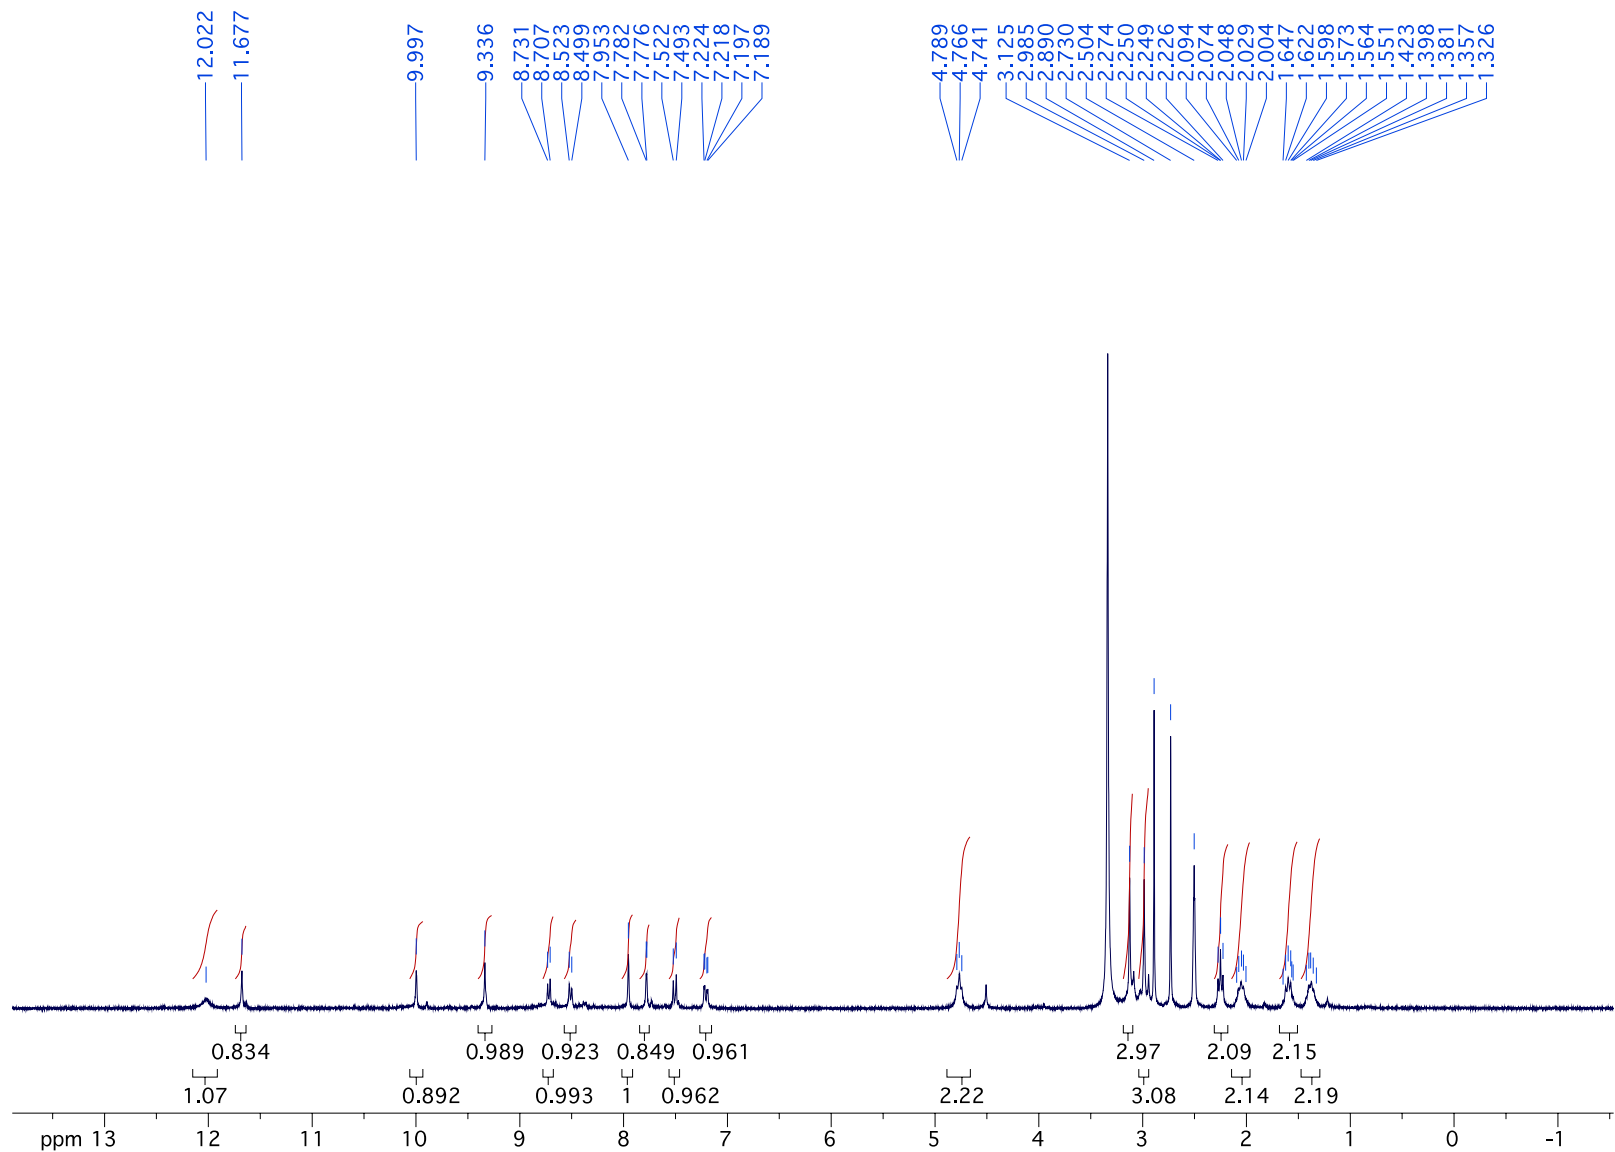

2-(5'-Carboxypentyl)-7-hydroxyisoellipticinium bromide **27** ( $^{13}\text{C}$  NMR spectrum in  $\text{DMSO-}d_6$  at 75.5 MHz)

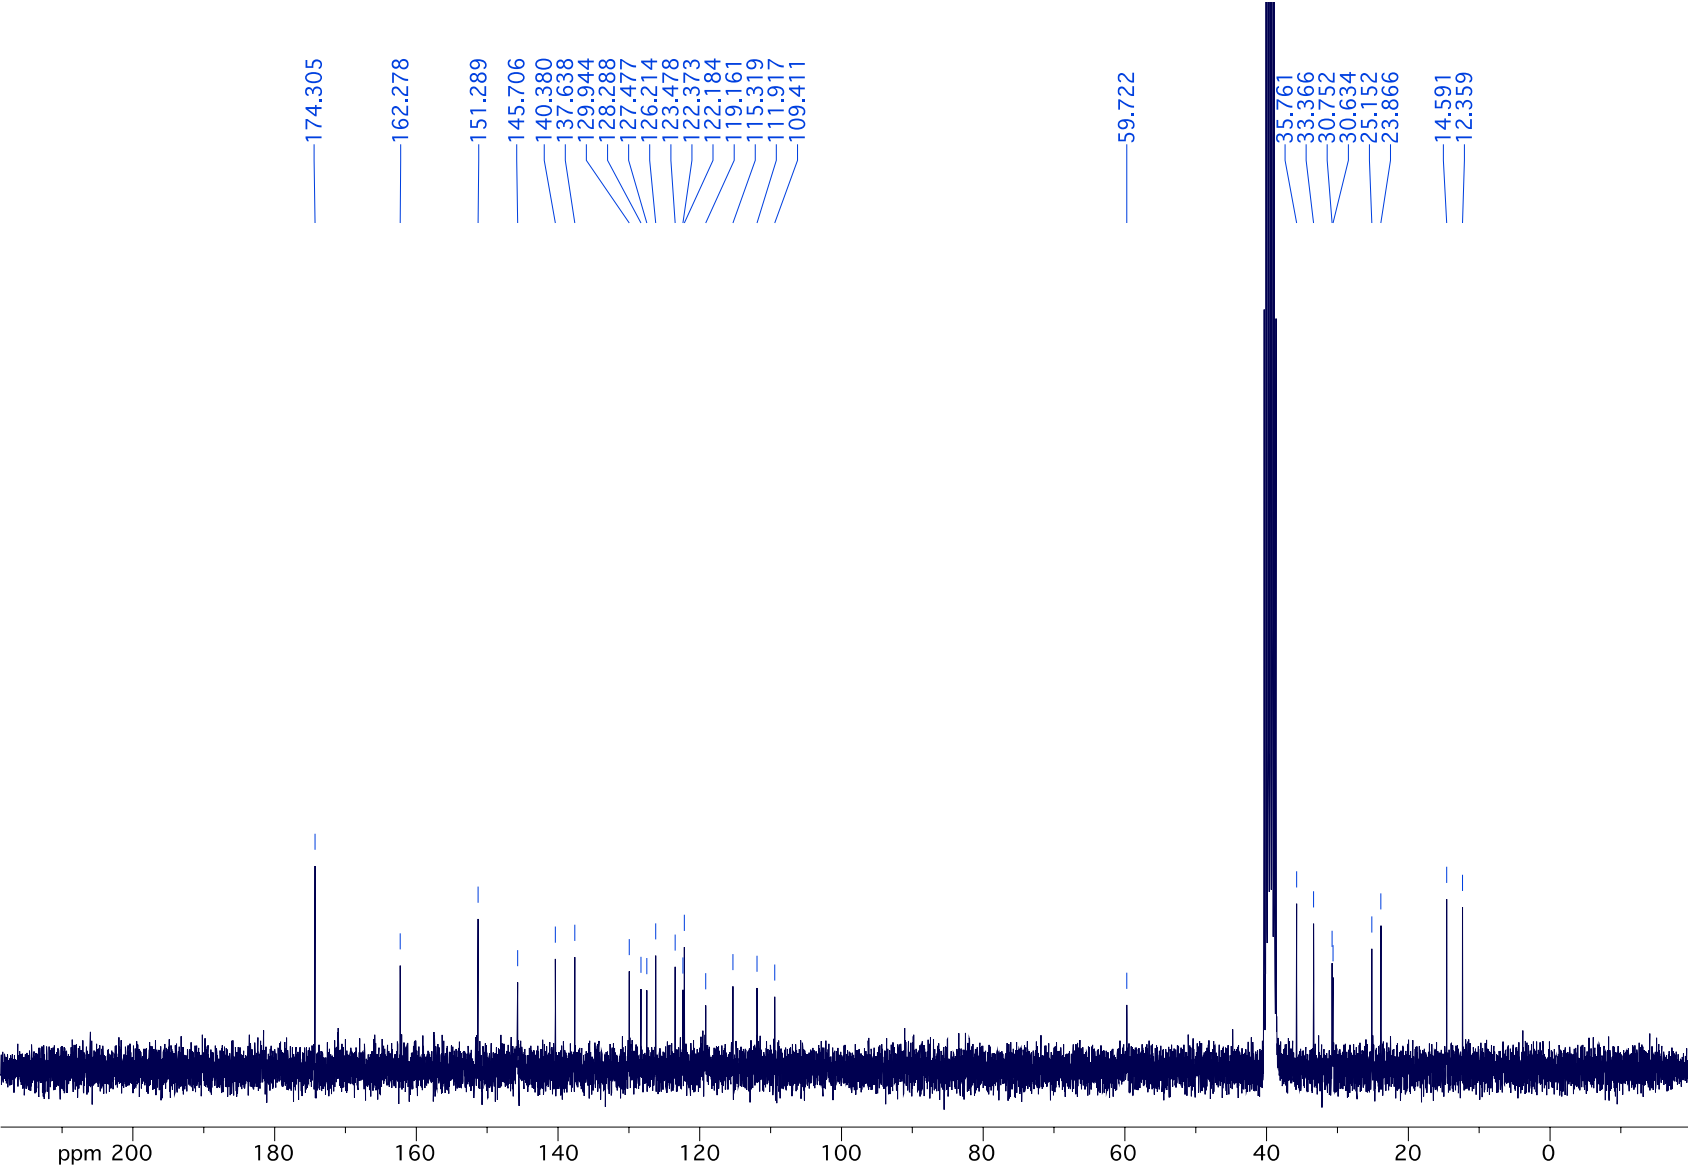

2-(5'-Cyanopentyl)-7-hydroxyisoellipticinium bromide **28** (<sup>1</sup>H NMR spectrum in DMSO-*d*<sub>6</sub> at 400 MHz)

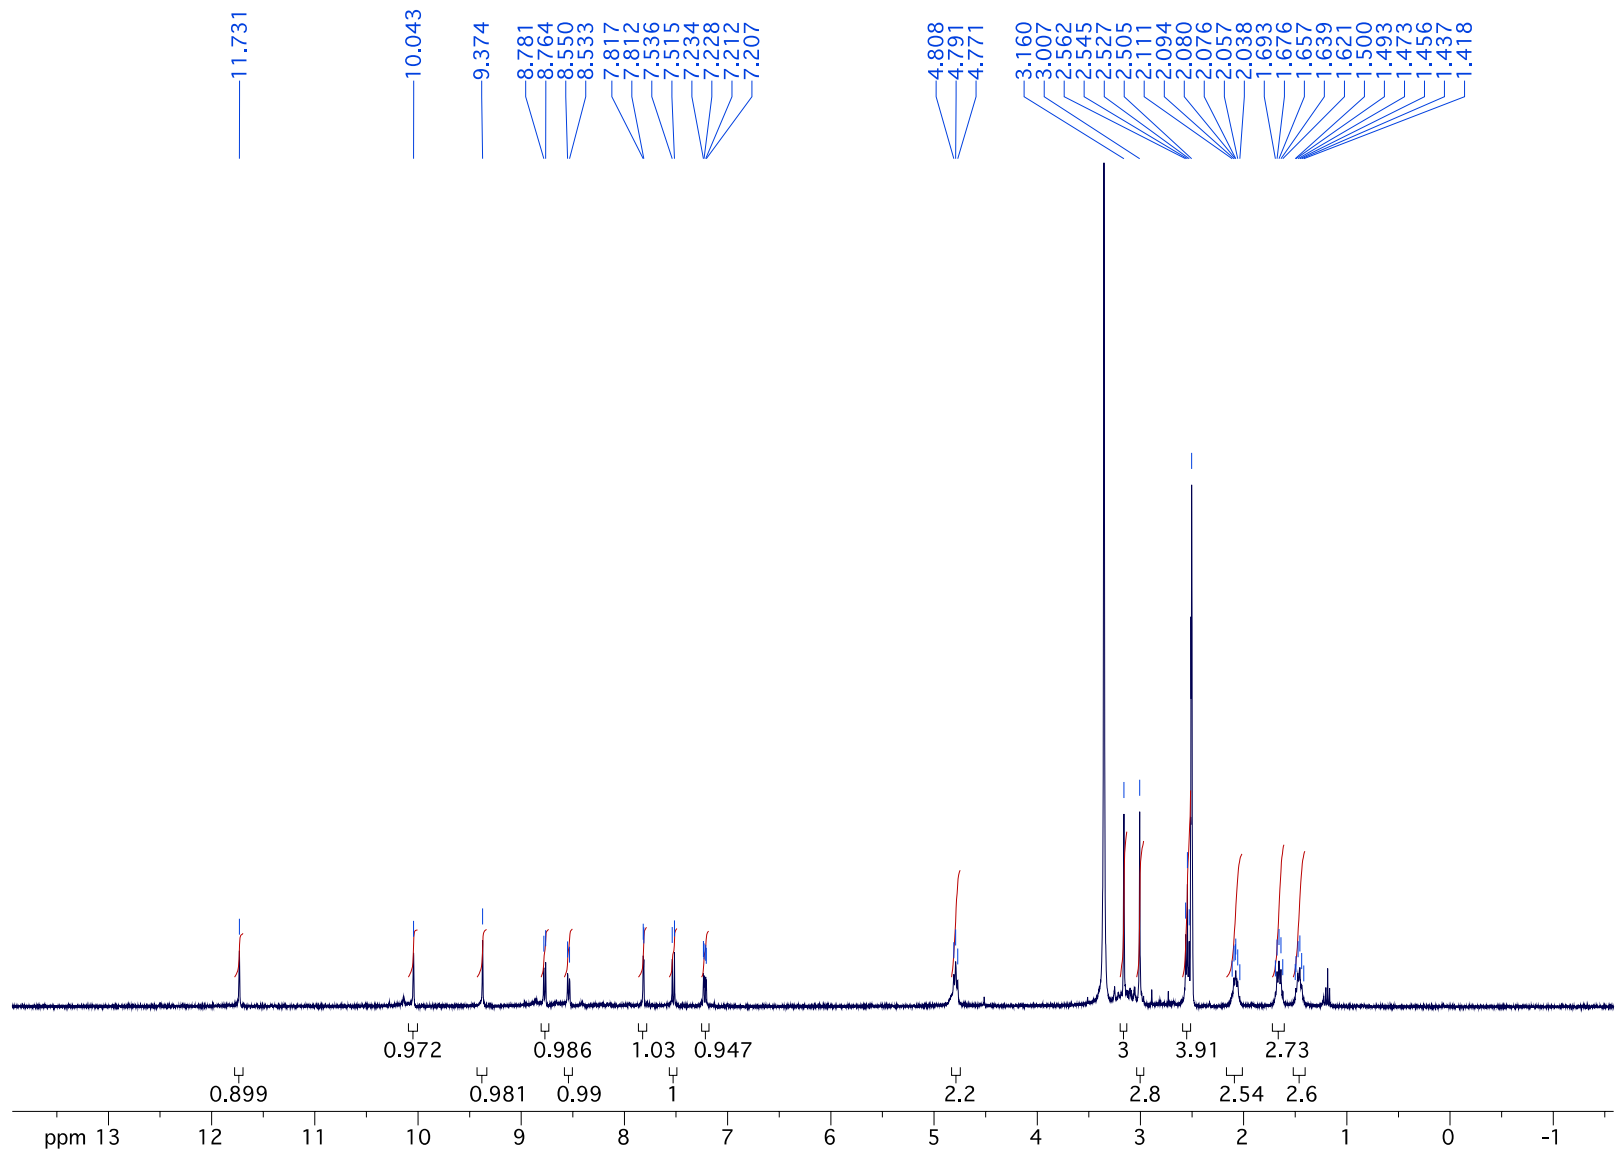

2-(5'-Cyanopentyl)-7-hydroxyisoellipticinium bromide **28** (<sup>13</sup>C NMR spectrum in DMSO-*d*<sub>6</sub> at 75.5 MHz)

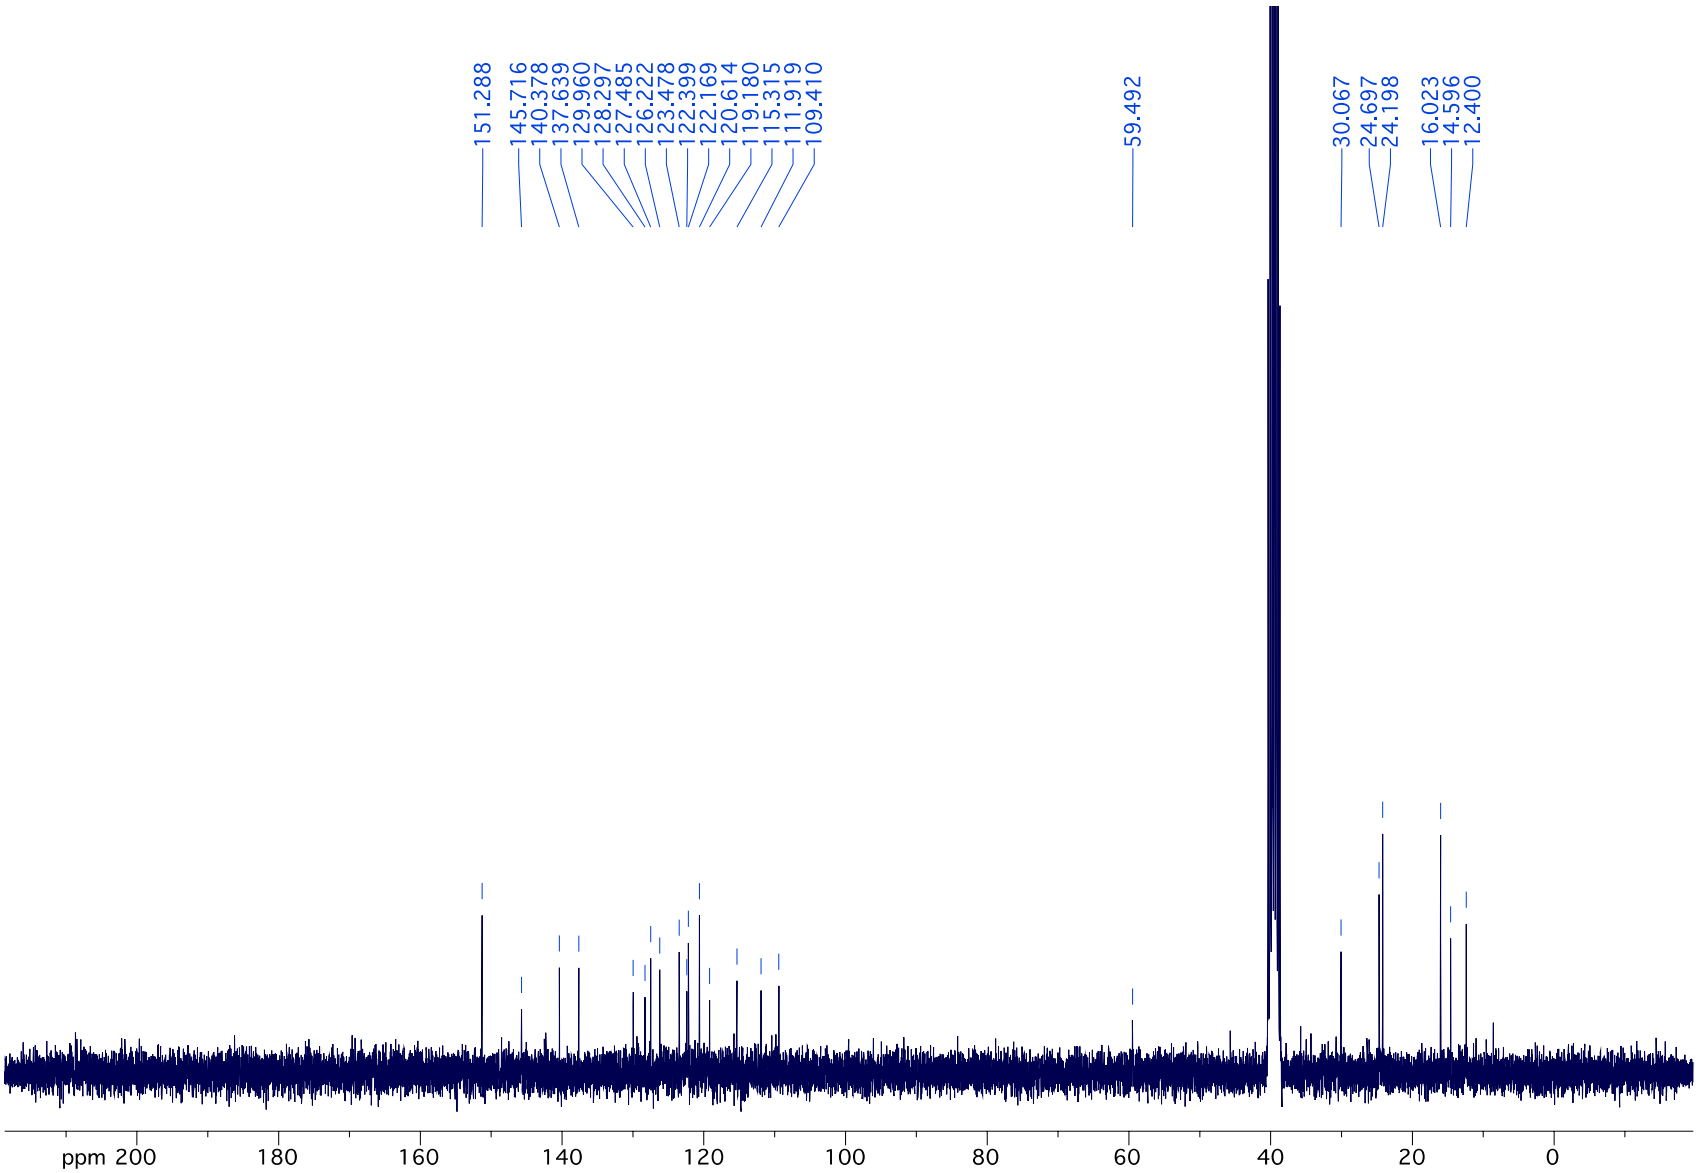

2-(6'-Carboxamidohexyl)-7-hydroxyisoellipticinium bromide **29** (<sup>1</sup>H NMR spectrum in DMSO-*d*<sub>6</sub> at 400 MHz)

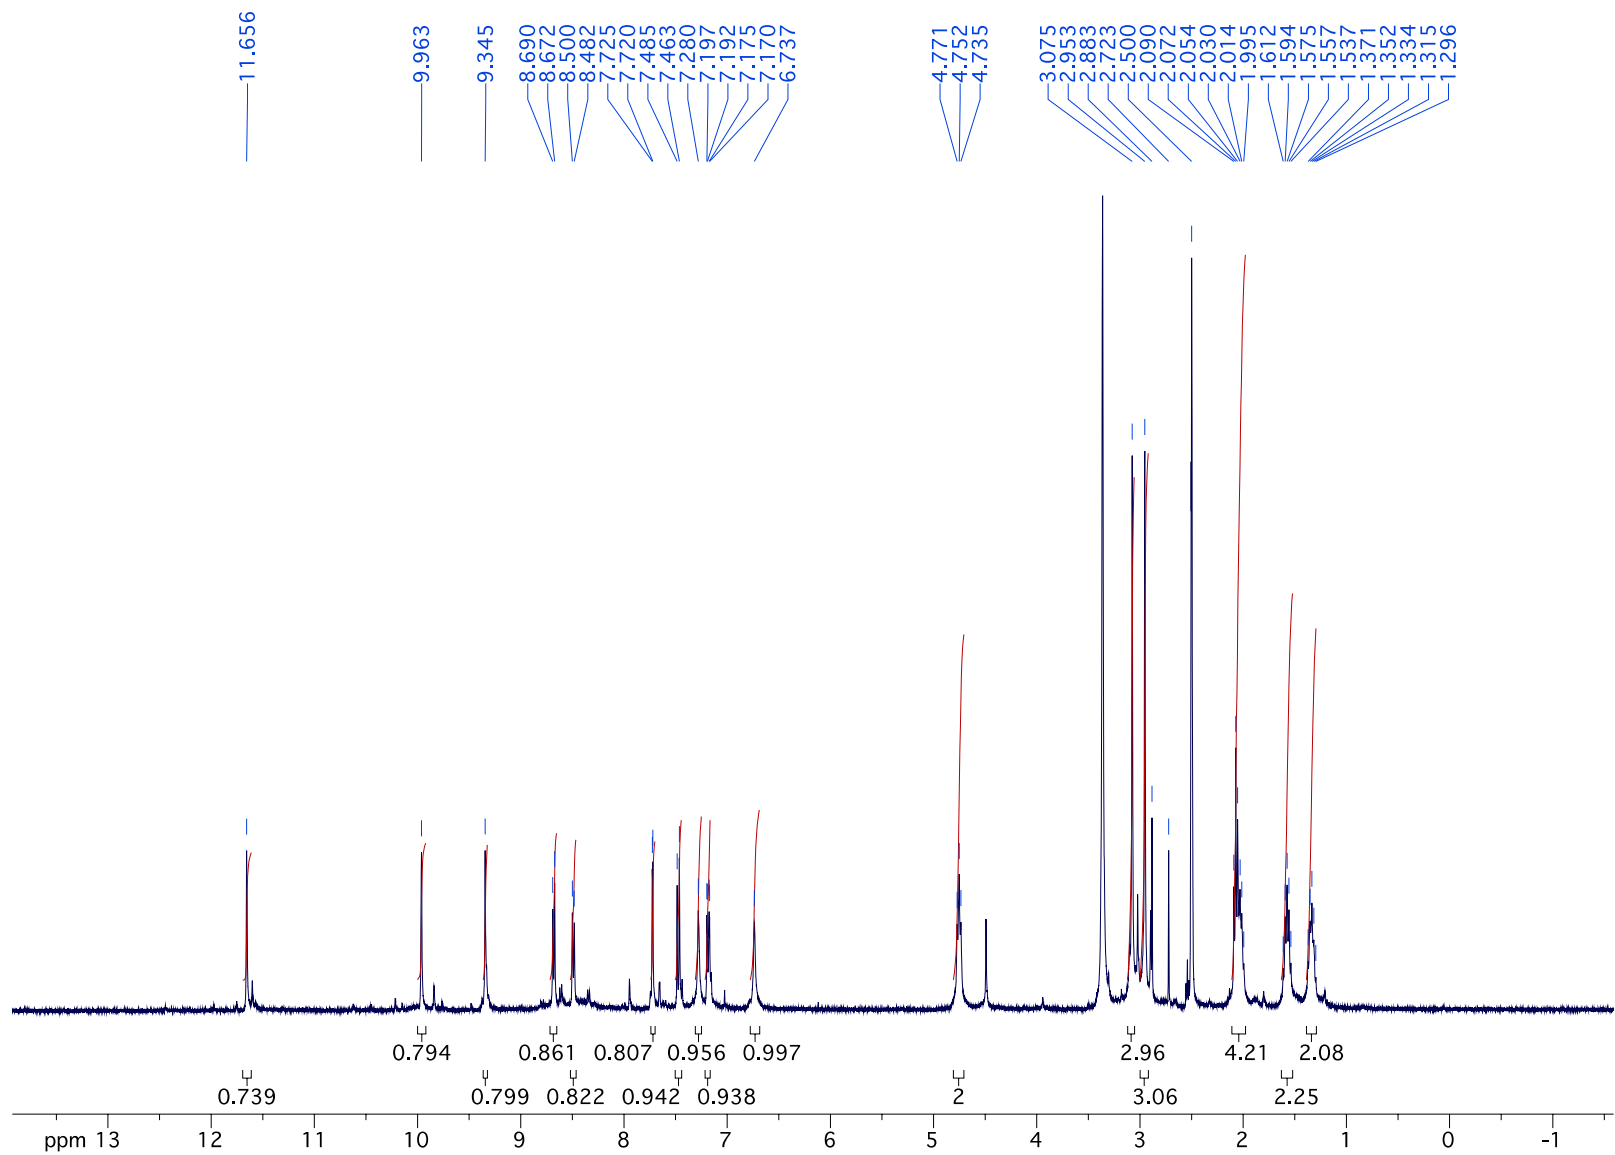

2-(6'-Carboxamidohexyl)-7-hydroxyisoellipticinium bromide **29** (<sup>13</sup>C NMR spectrum in DMSO-*d*<sub>6</sub> at 75.5 MHz)

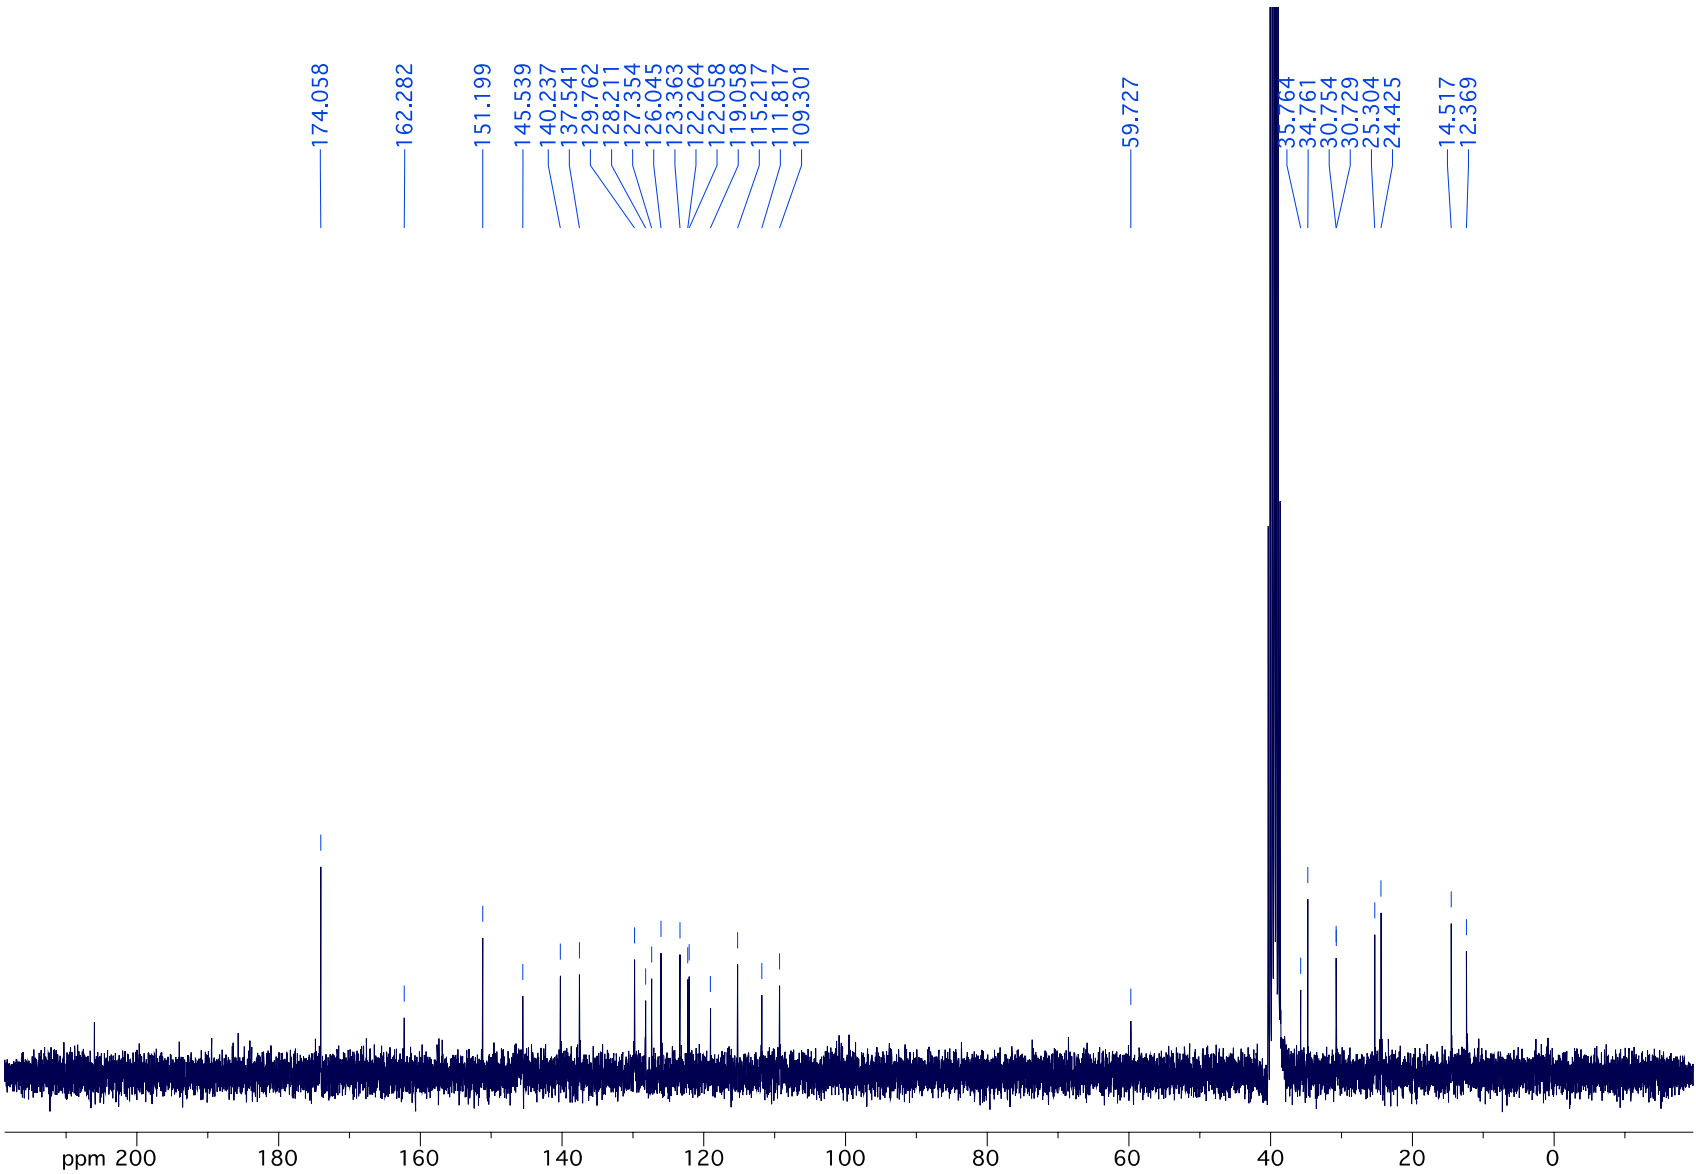

7-Hydroxy-*N*<sup>2</sup>-(6'-methylsulfonamido-6-oxohexyl)isoellipticinium bromide **30** (<sup>1</sup>H NMR in DMSO-*d*<sub>6</sub> at 400 MHz)

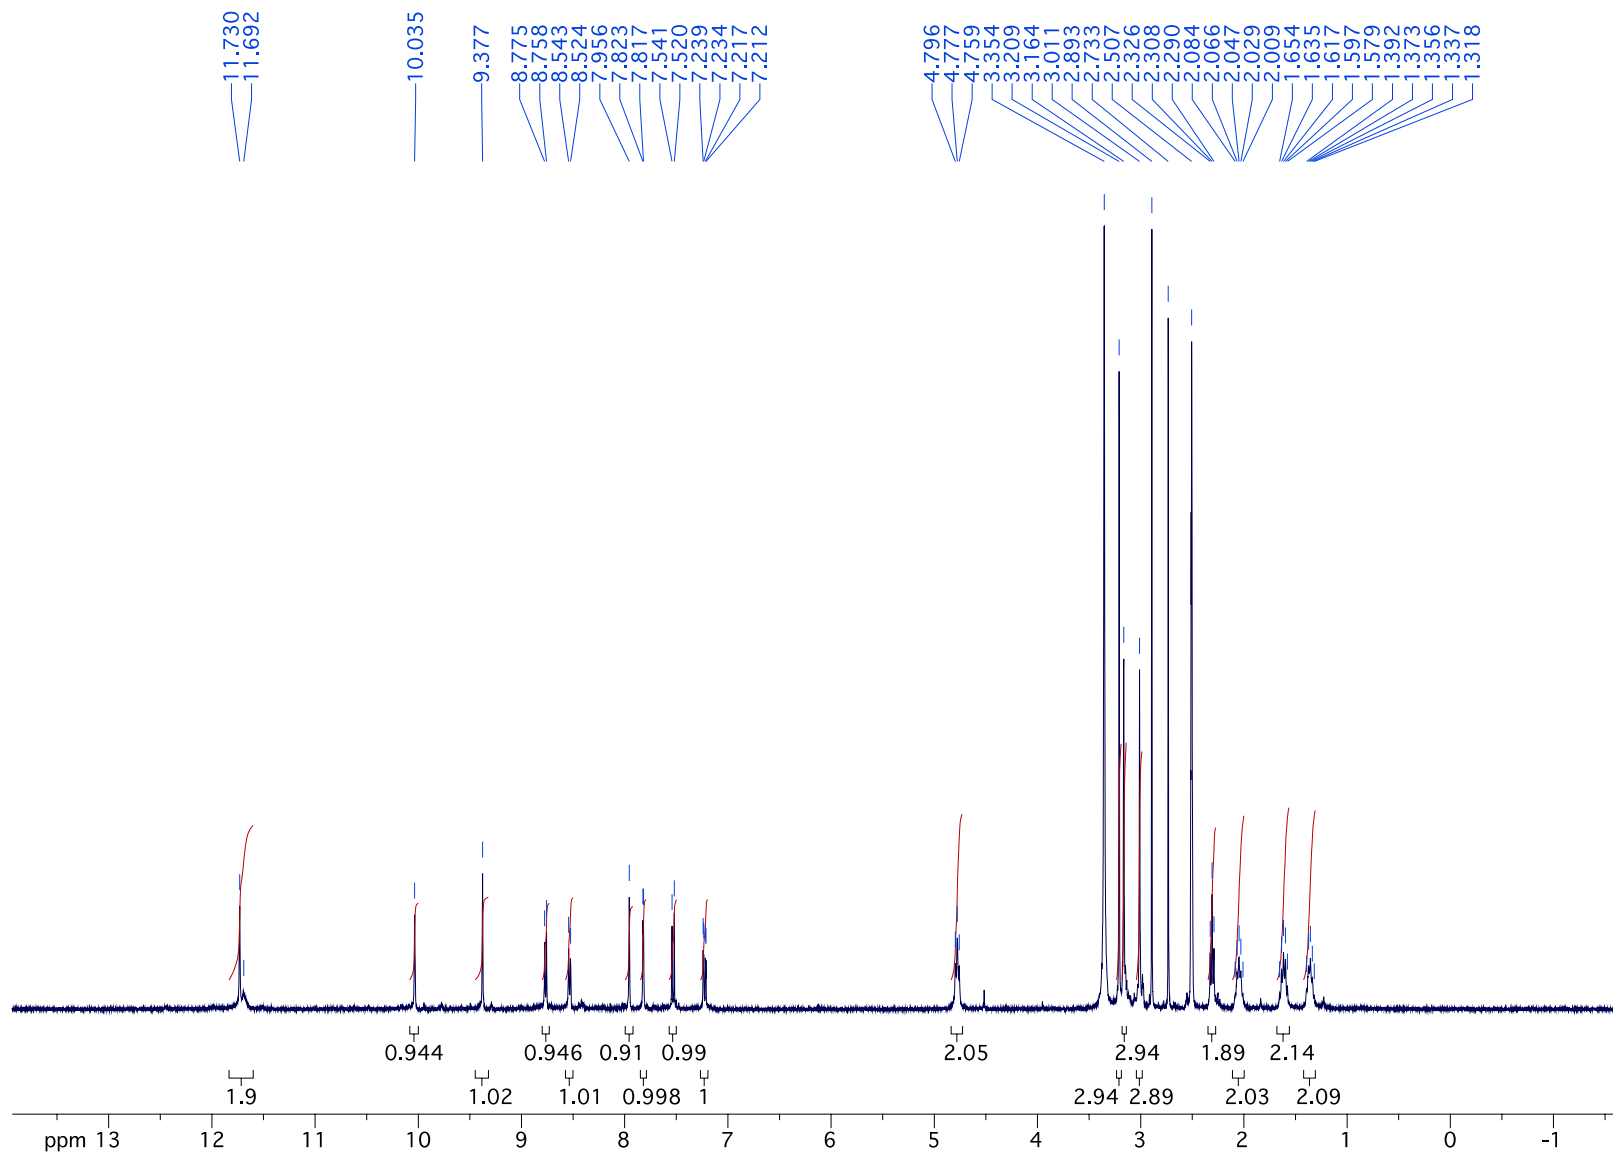

7-Hydroxy-*N*<sup>2</sup>-(6'-methylsulfonamido-6-oxohexyl)isoellipticinium bromide **30** (<sup>13</sup>C NMR in DMSO-*d*<sub>6</sub> at 75.5 MHz)

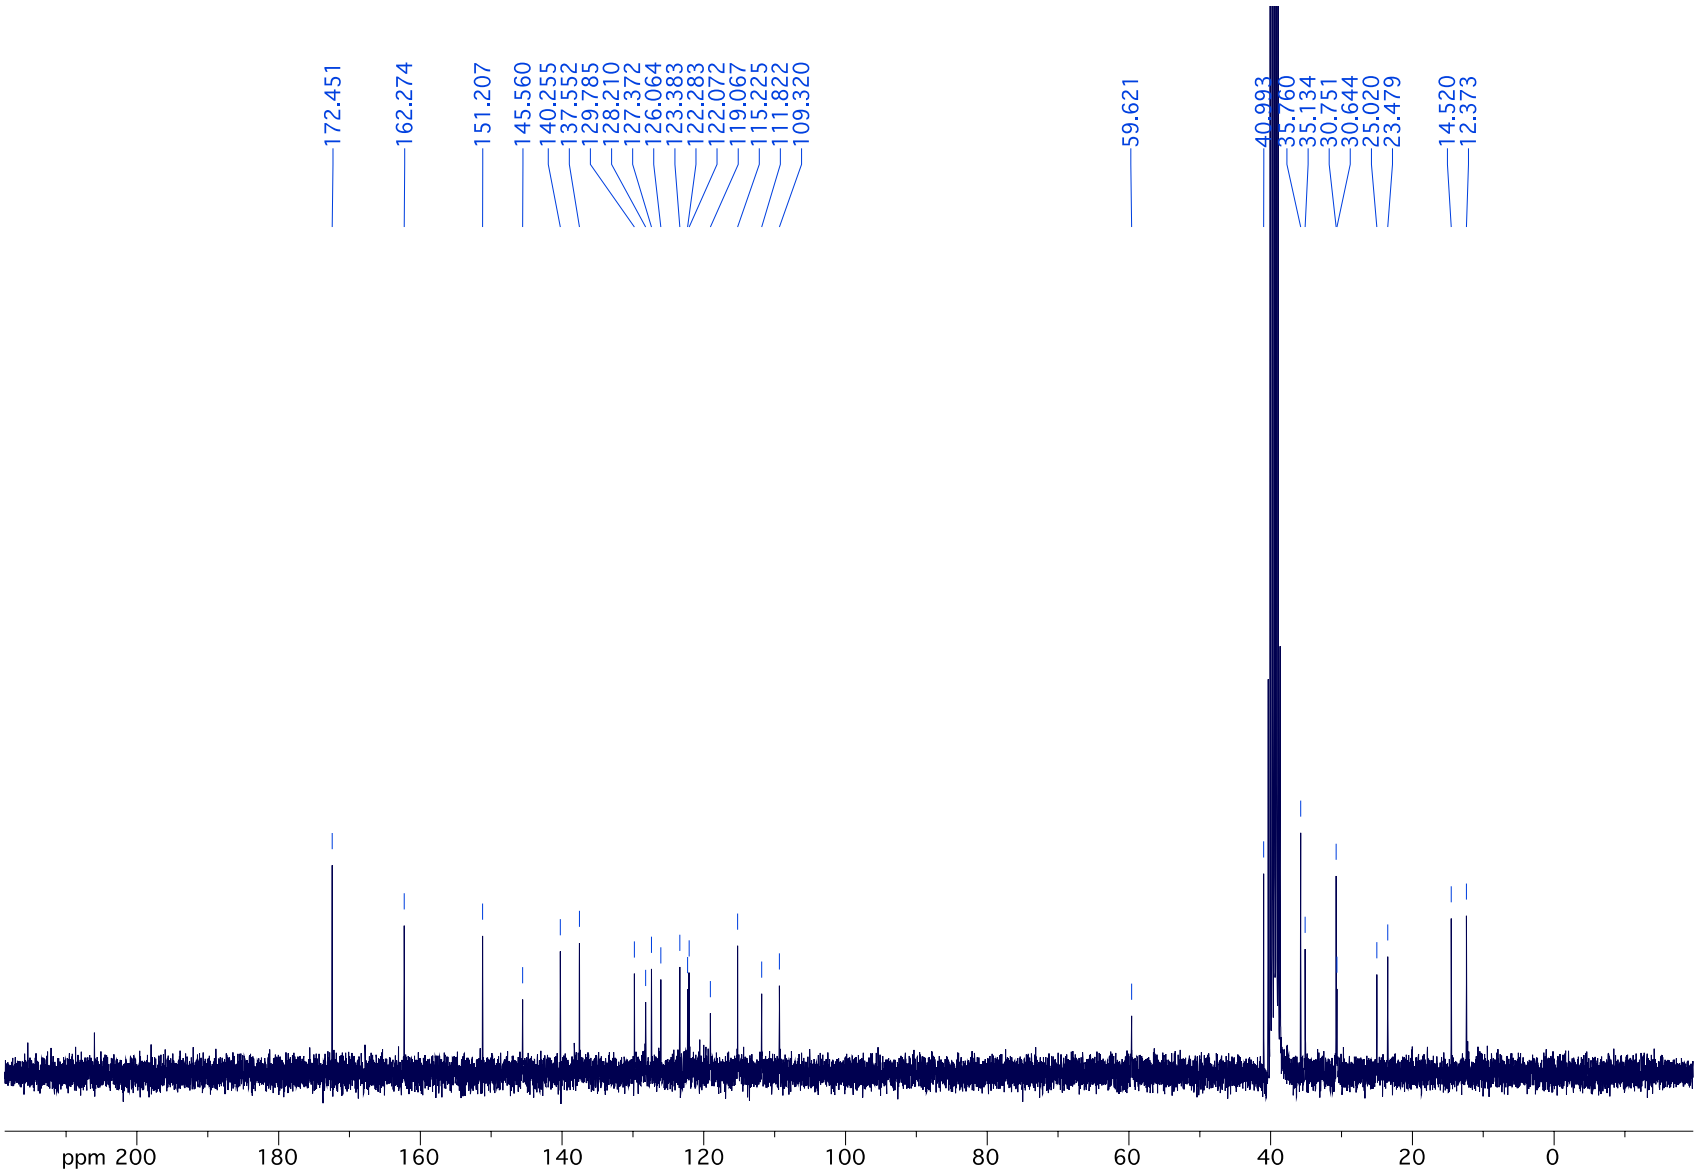



### 3. HPLC

#### 5,11-Dimethyl-10*H*-pyrido[3,4-*b*]carbazole-7-carbaldehyde 6

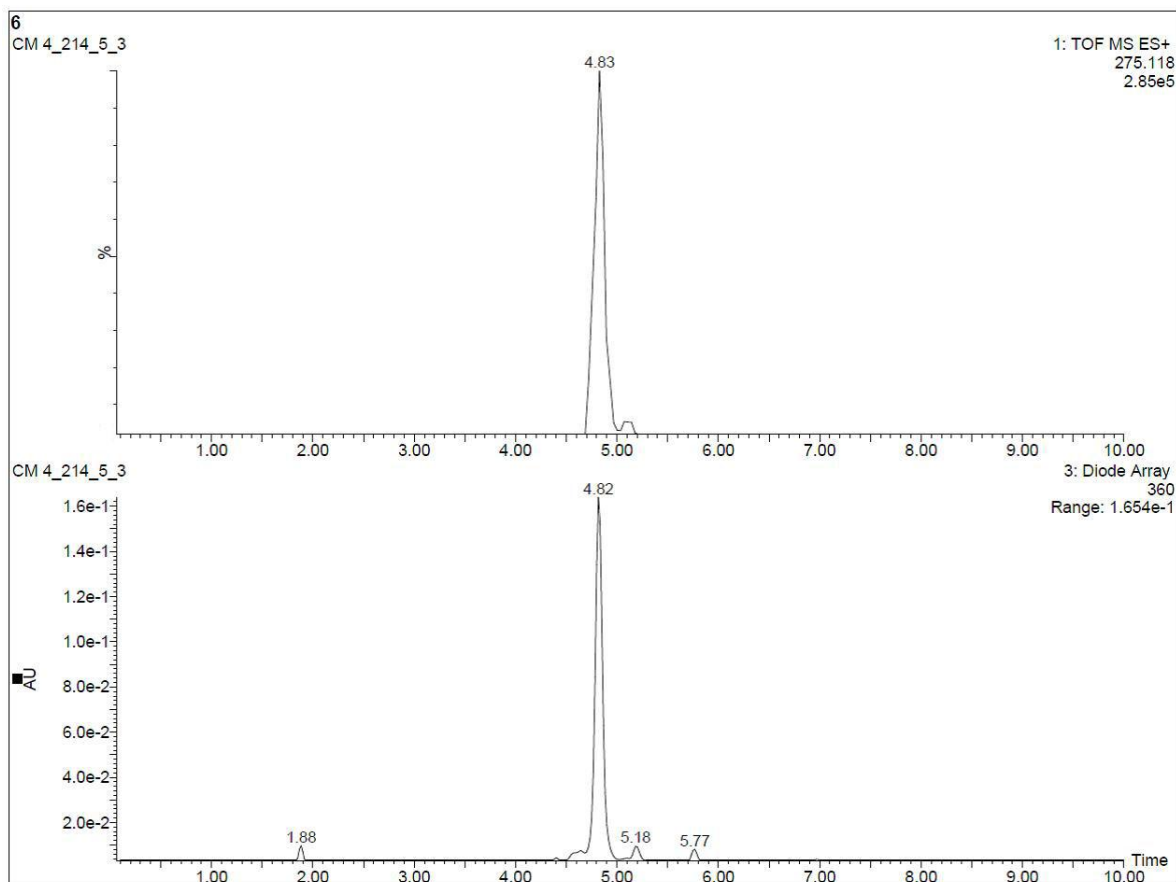

#### 5,11-Dimethyl-10*H*-pyrido[3,4-*b*]carbazol-7-ol 7

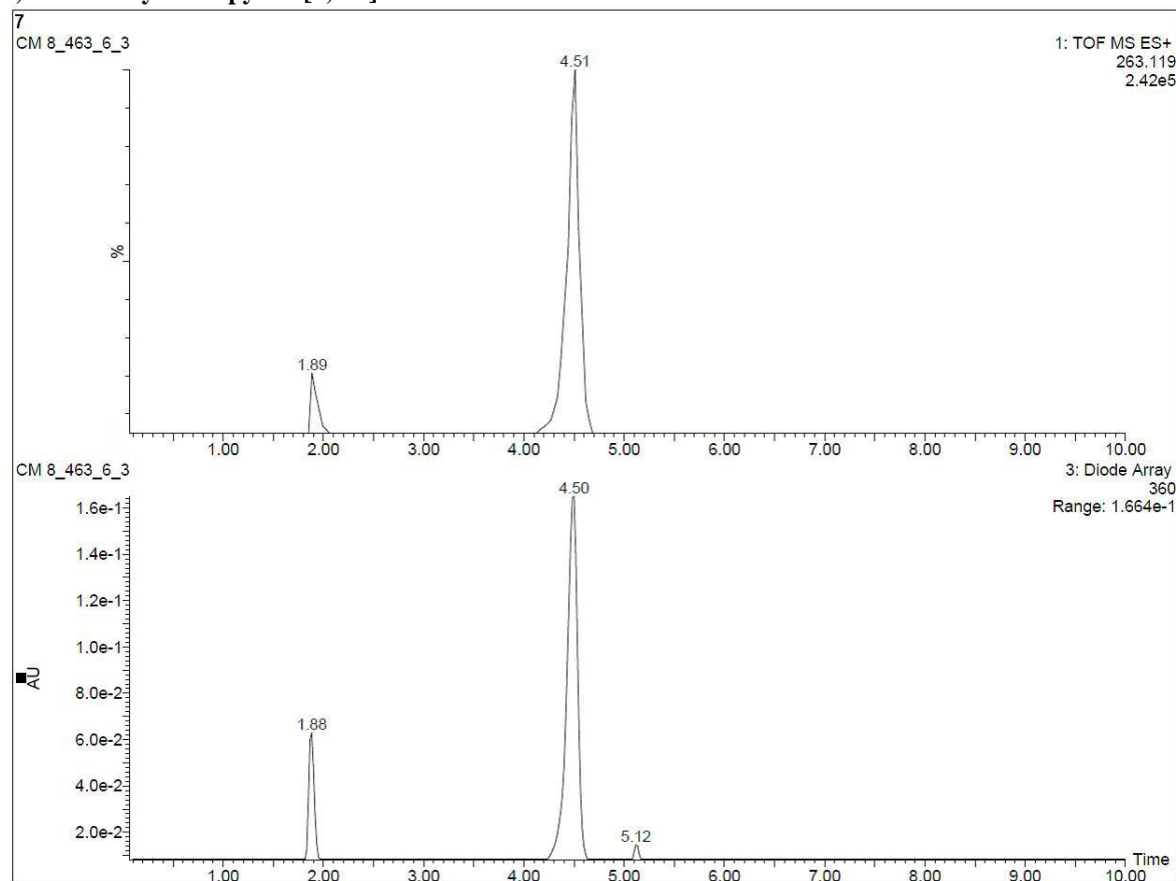

**6,11-Dimethyl-5*H*-benzo[*b*]carbazol-2-ol 9**

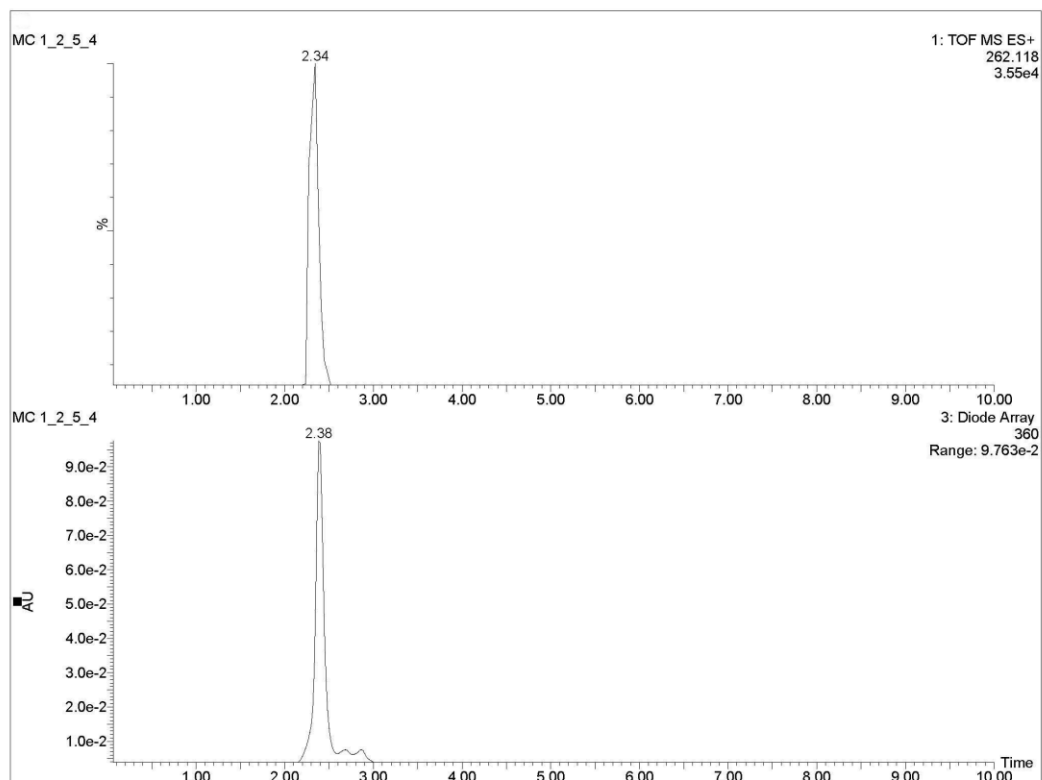

**2-Methoxy-6,11-dimethyl-5*H*-benzo[*b*]carbazole 14**

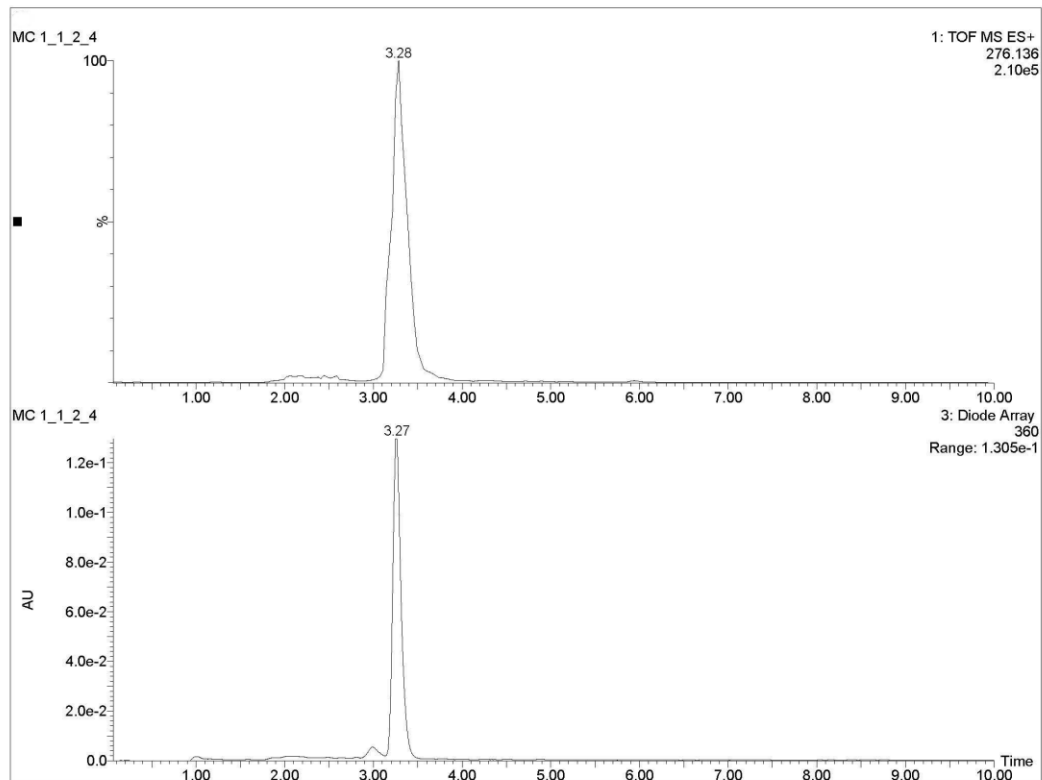

**2-Methylisoellipticinium iodide 16**

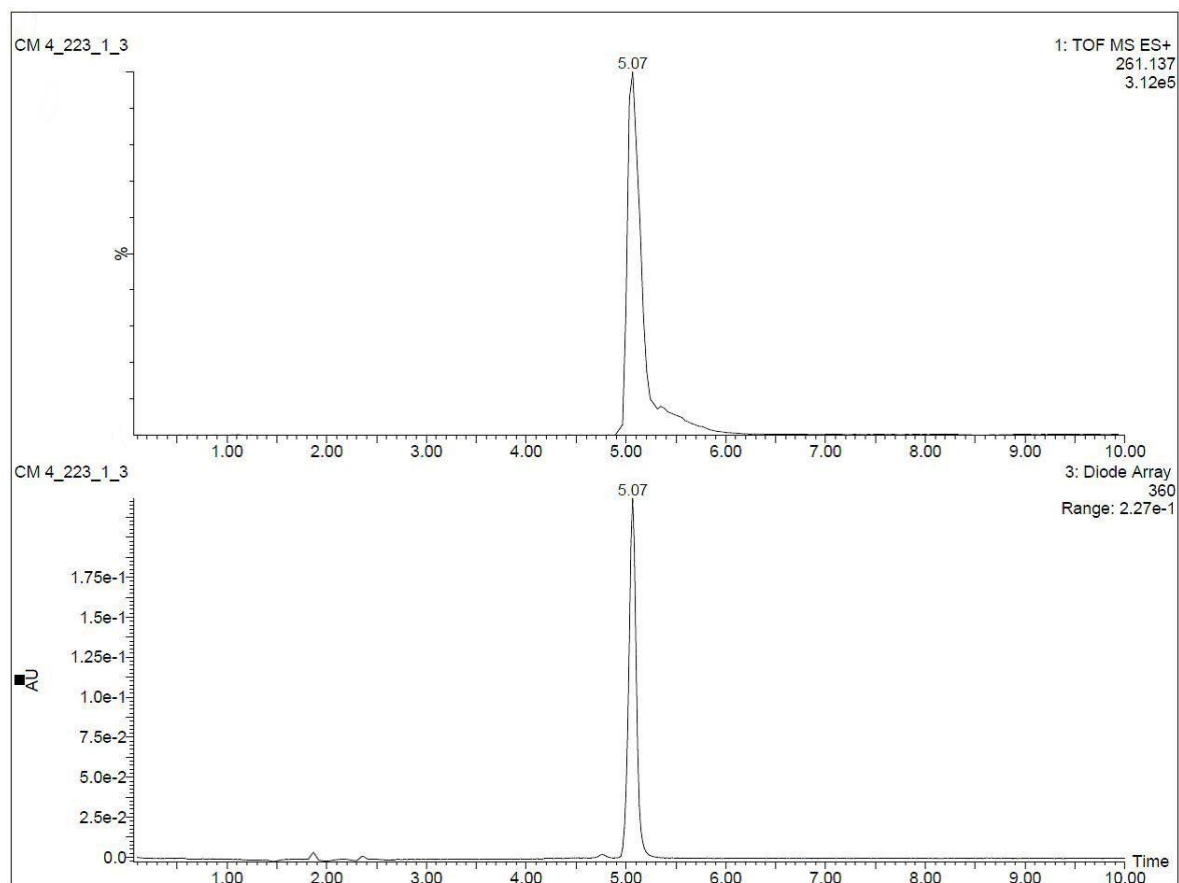

**2-(3'-Cyanopropyl)isoellipticinium chloride 17**

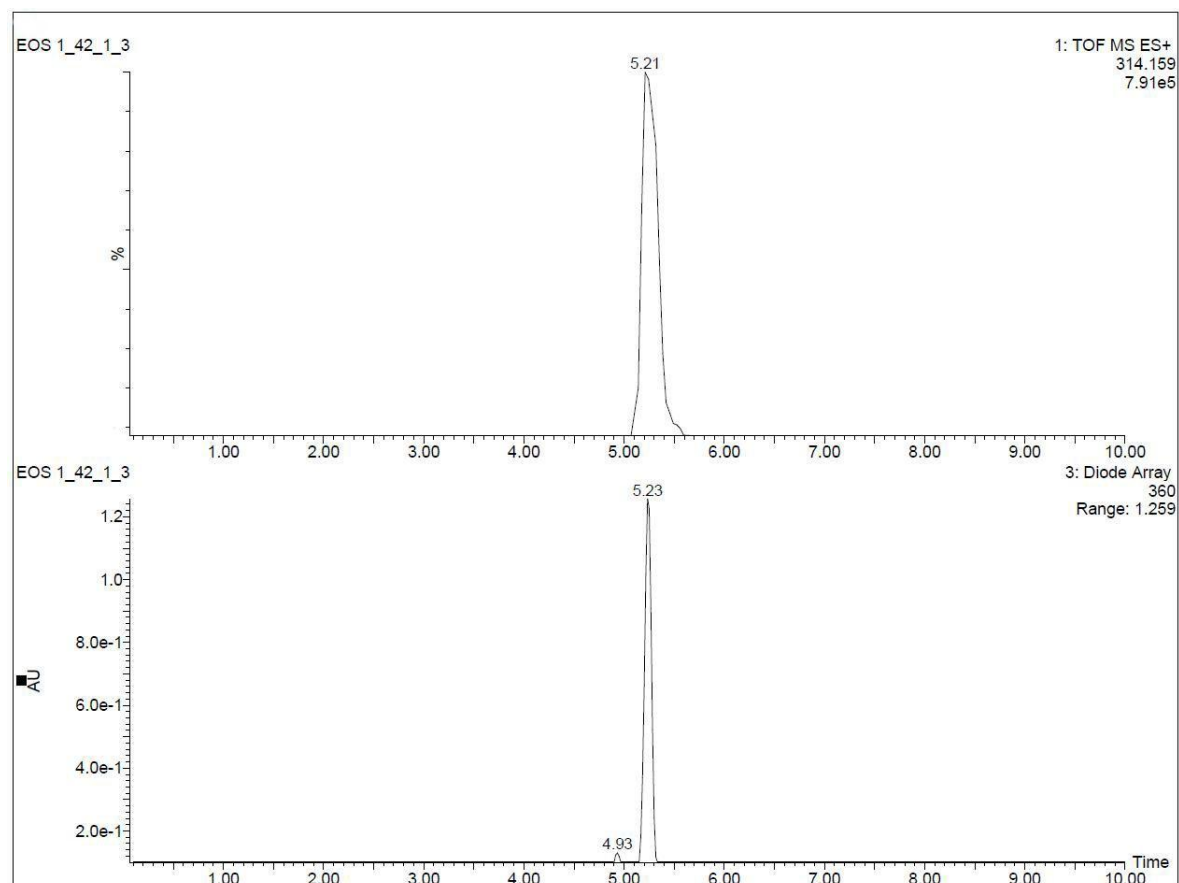

**2-(4'-Cyanobutyl)isoellipticinium chloride 18**

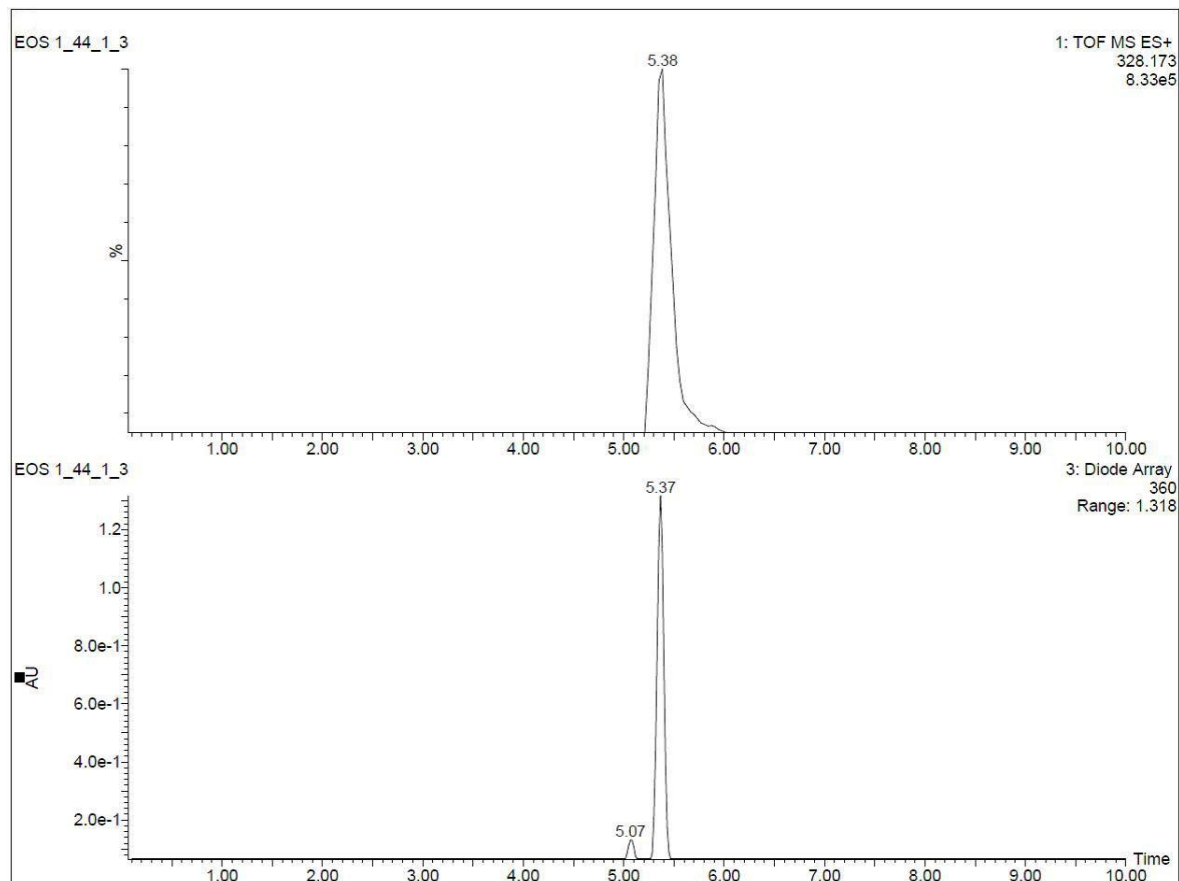

**2-(5'-Cyanopentyl)isoellipticinium bromide 19**

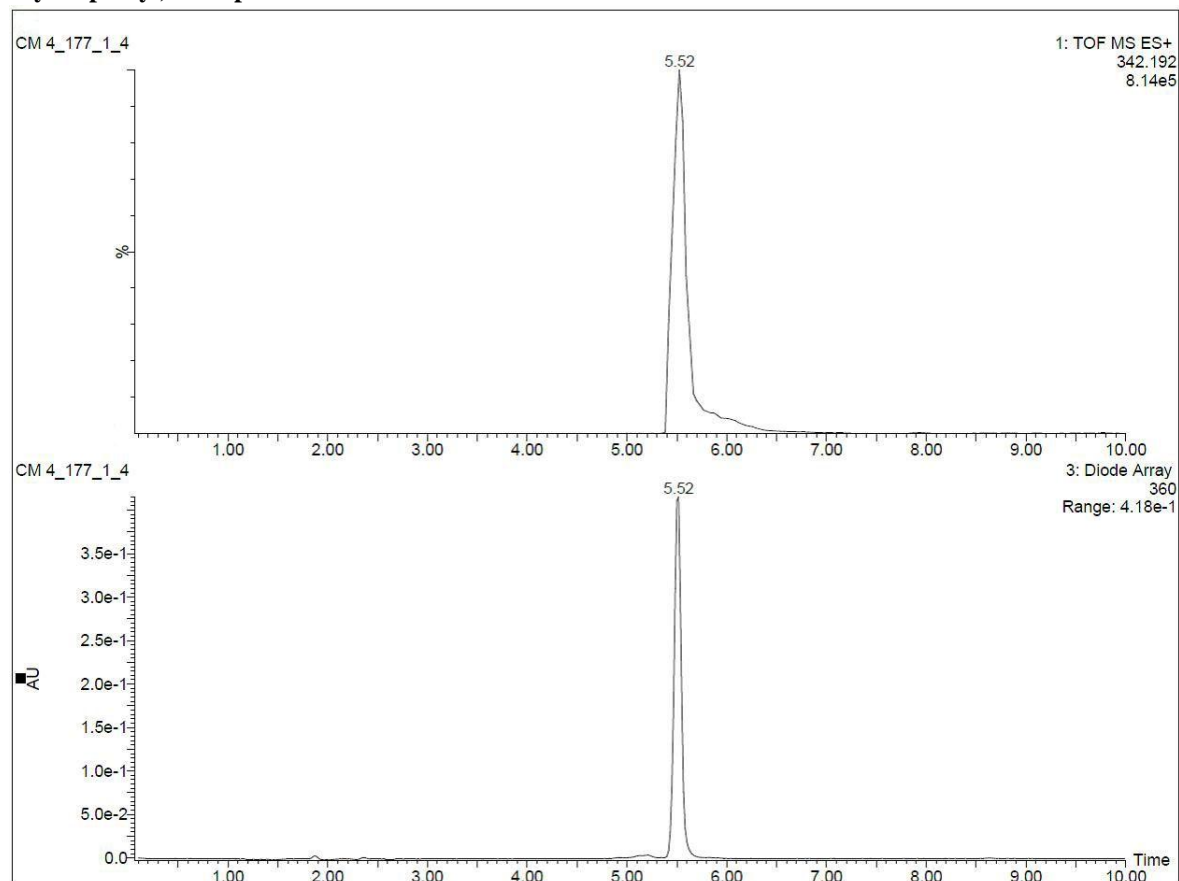

**2-(5'-Carboxypentyl)isoellipticinium bromide 20**

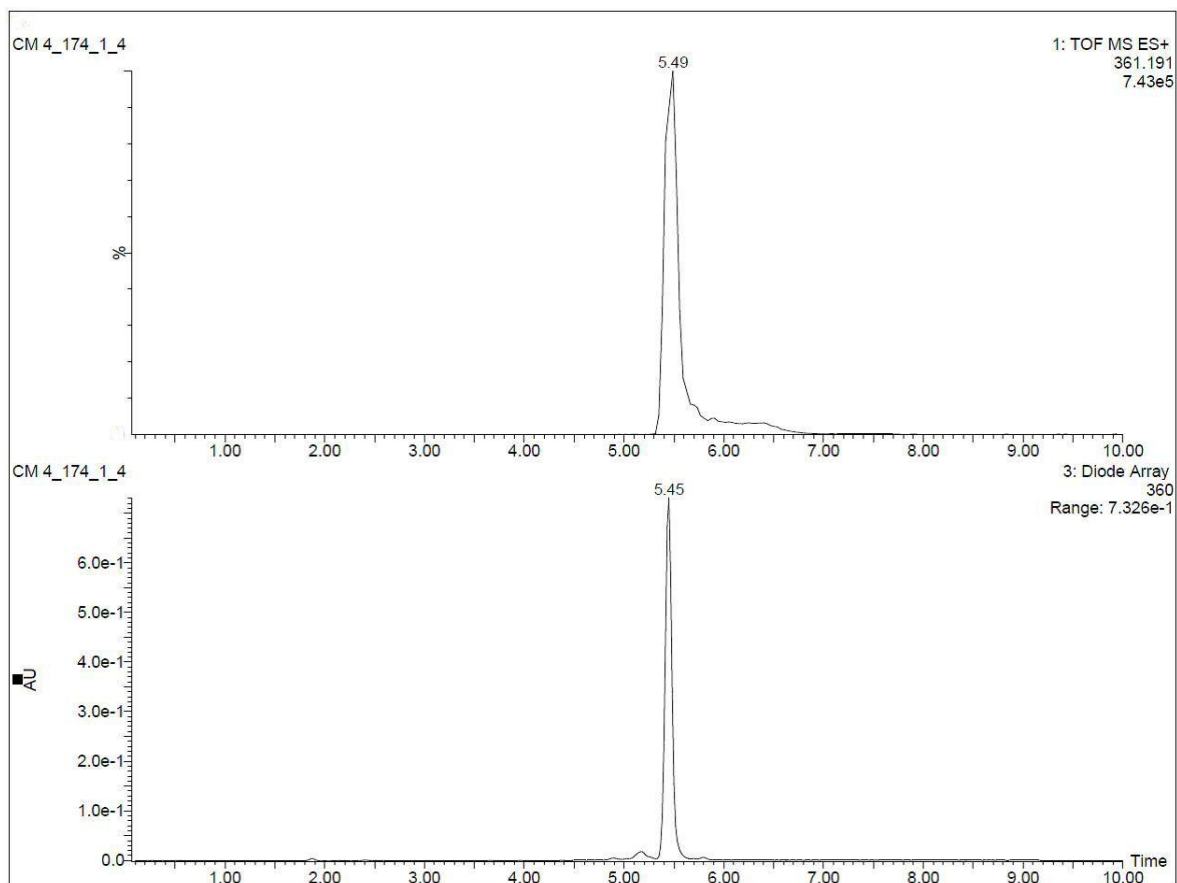

**2-(6'-Carboxamidoethyl)isoellipticinium bromide 21**

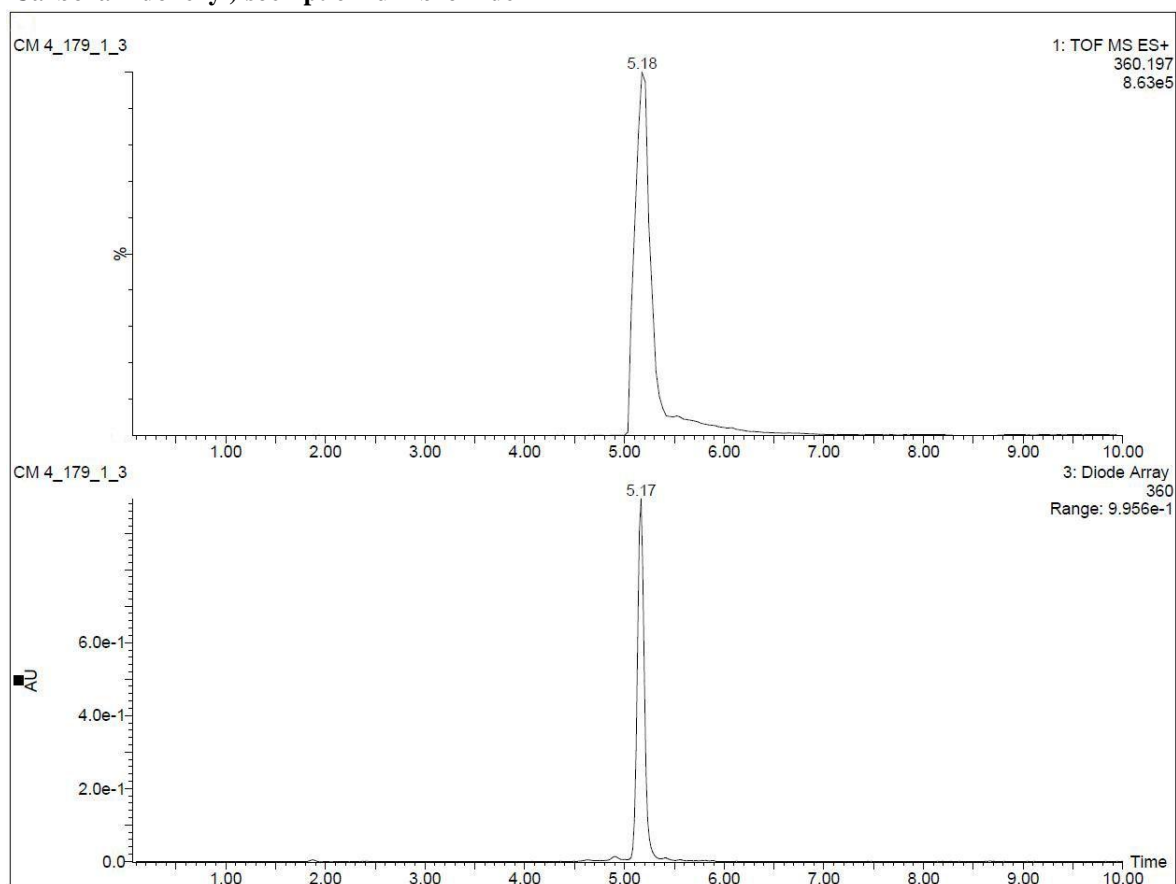

***N*<sup>2</sup>-(6'-Methylsulfonamido-6'-oxohexyl)isoellipticinium bromide 22**

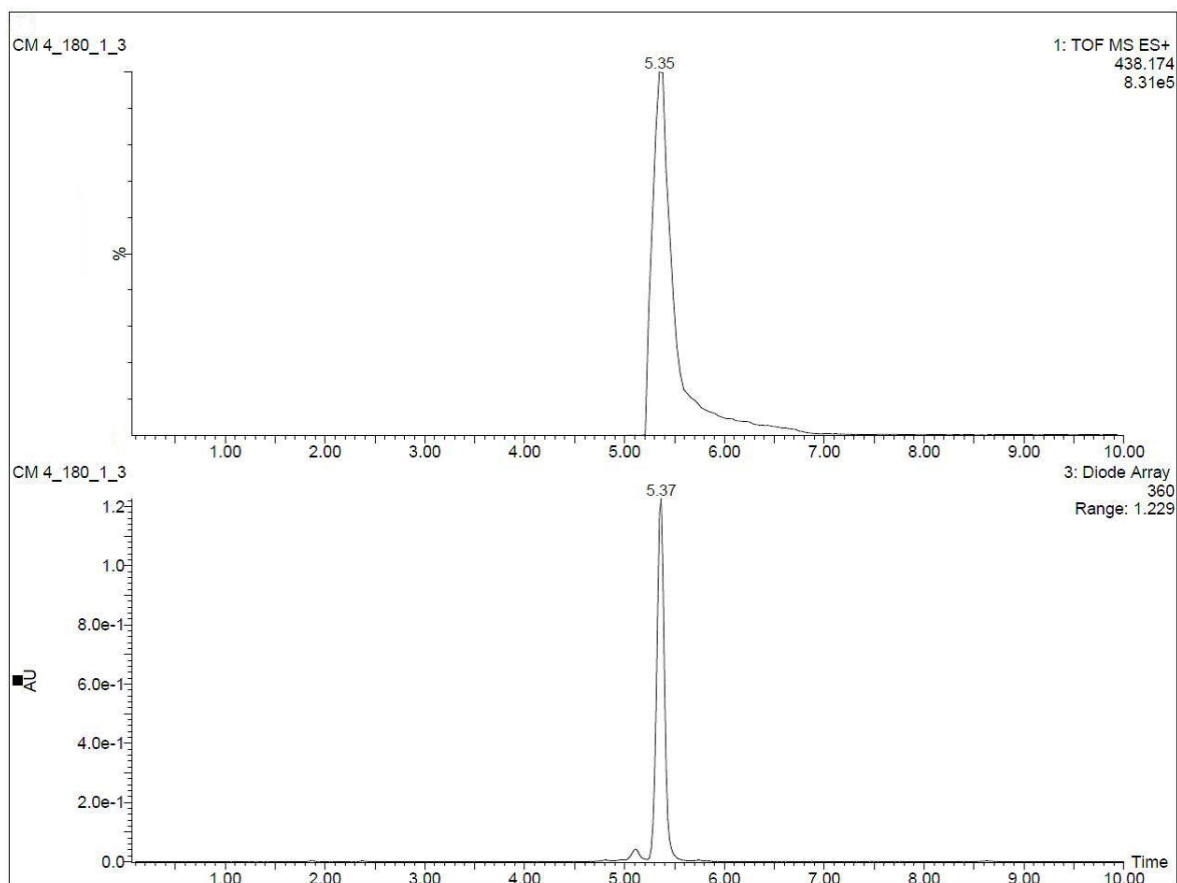

**2-(5'-Carboxypentyl)-7-formylisoellipticinium bromide 23**

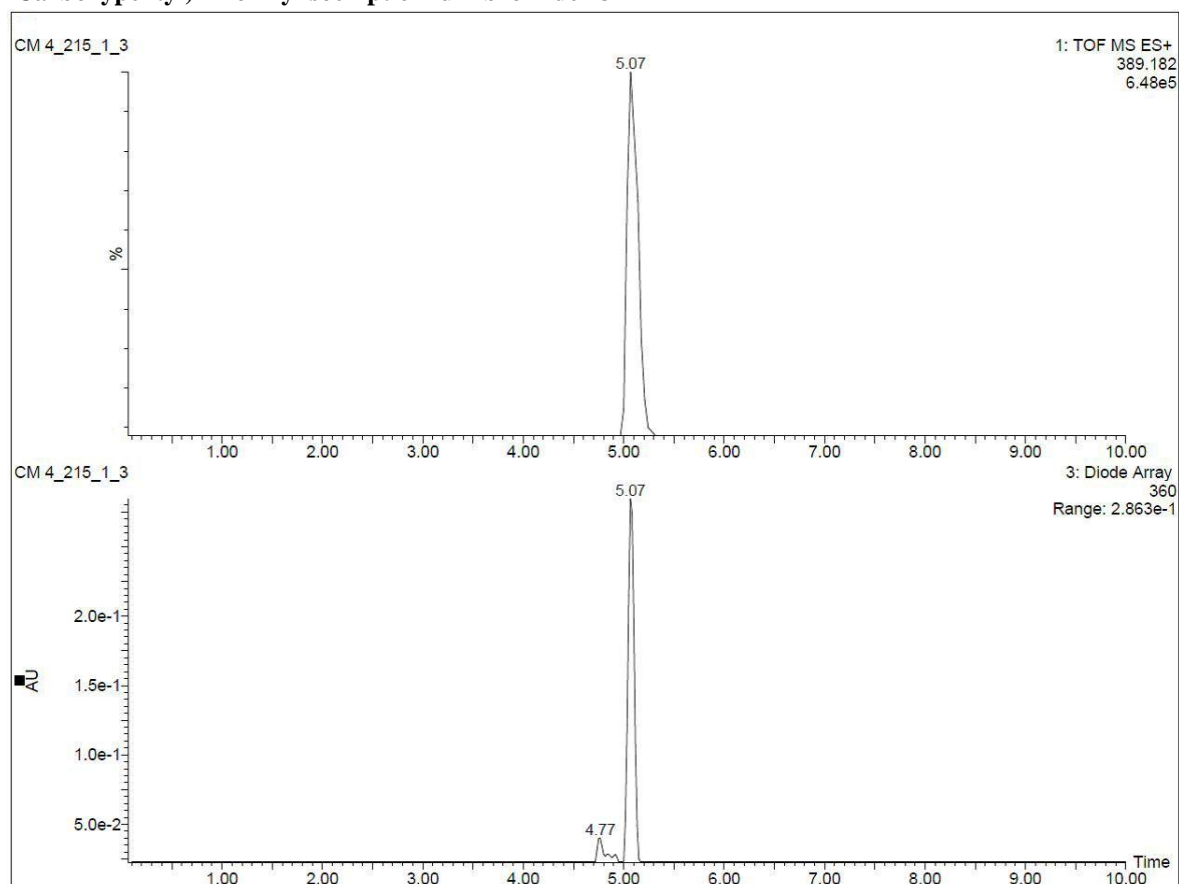

**2-(5'-Cyanopentyl)-7-formylisoellipticinium bromide 24**

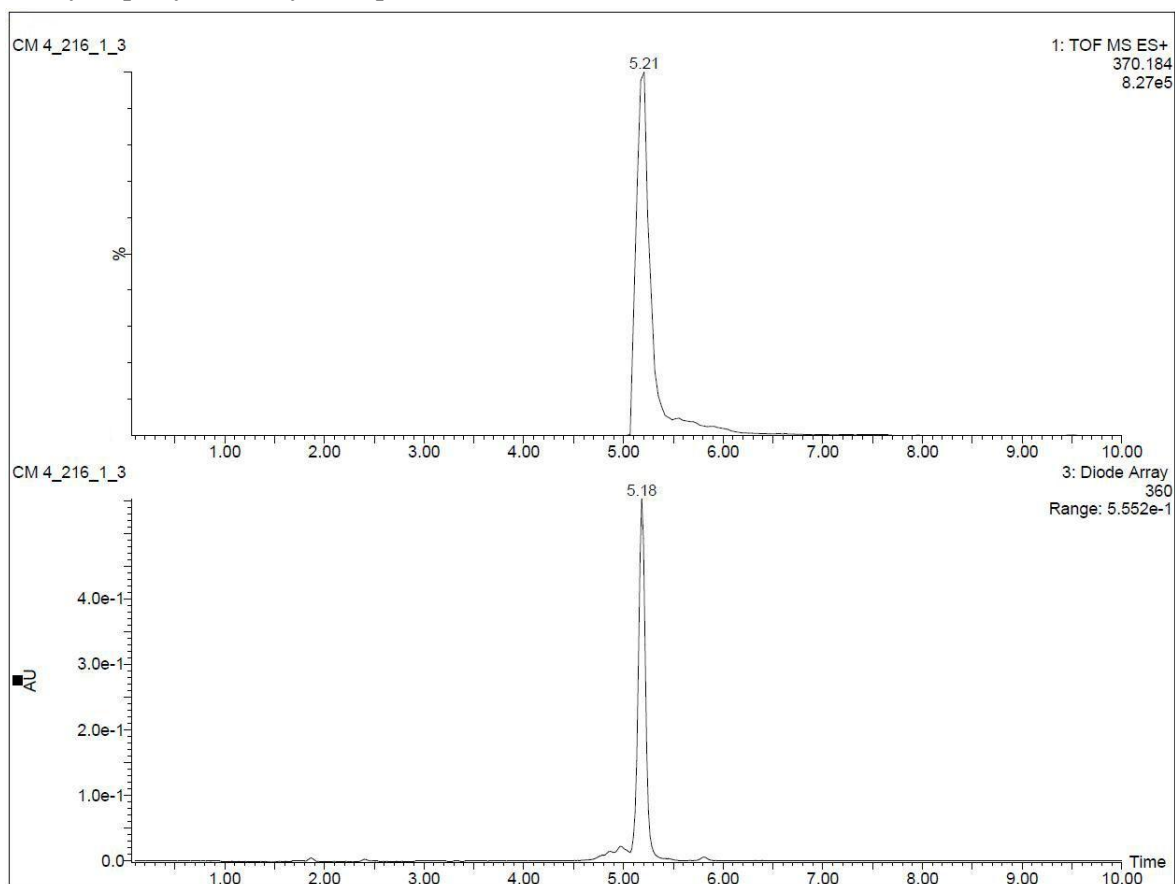

**2-(6'-Carboxamidohexyl)-7-formylisoellipticinium bromide 25**

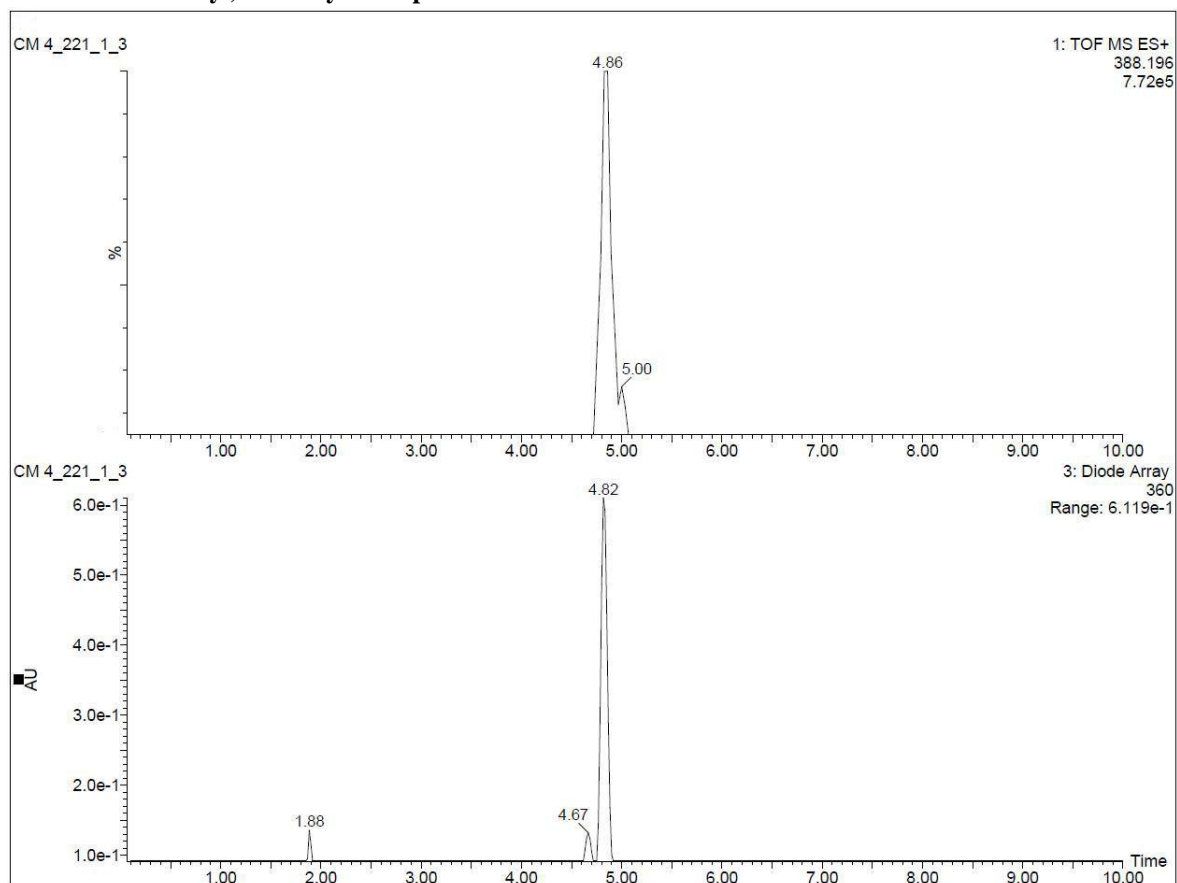

**7-Formyl-*N*<sup>2</sup>-(6'-methylsulfonamido-6'-oxohexyl) isoellipticinium bromide 26**

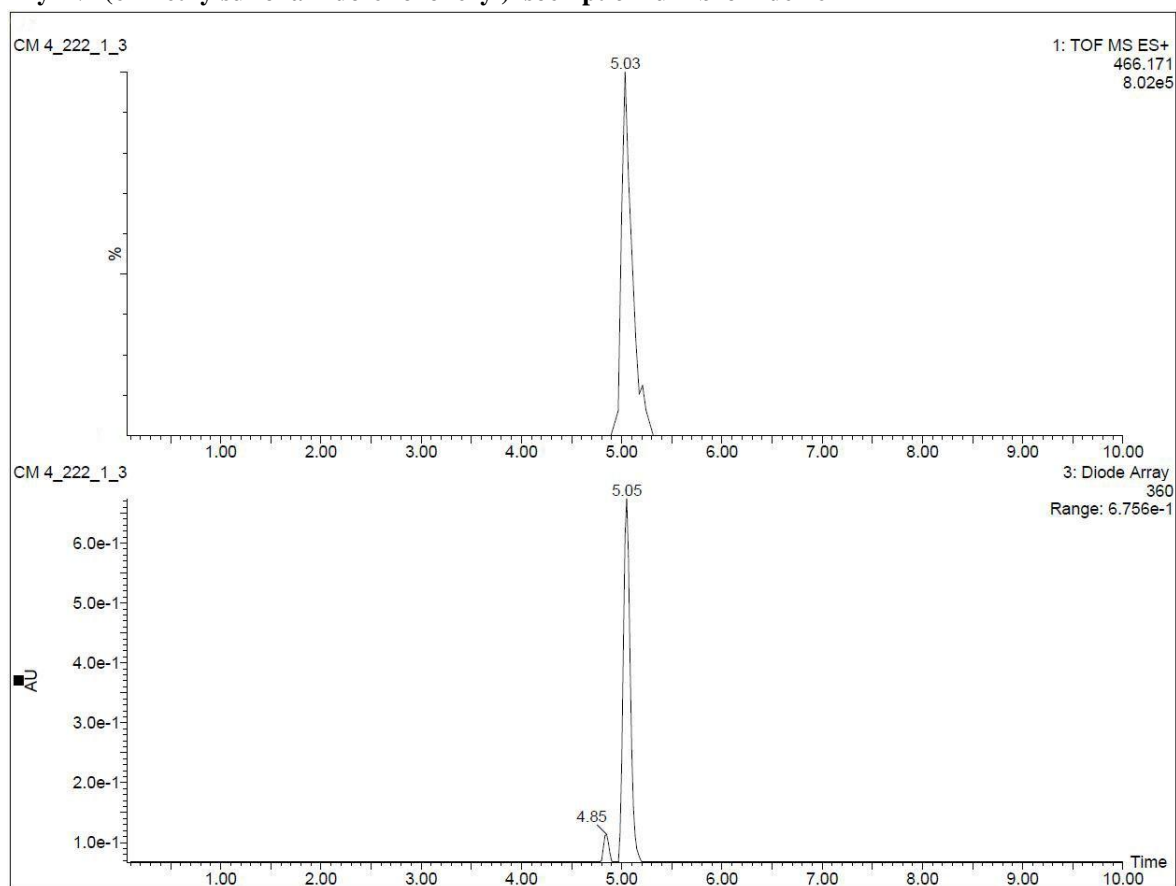

**2-(5'-Carboxypentyl)-7-hydroxyisoellipticinium bromide 27**

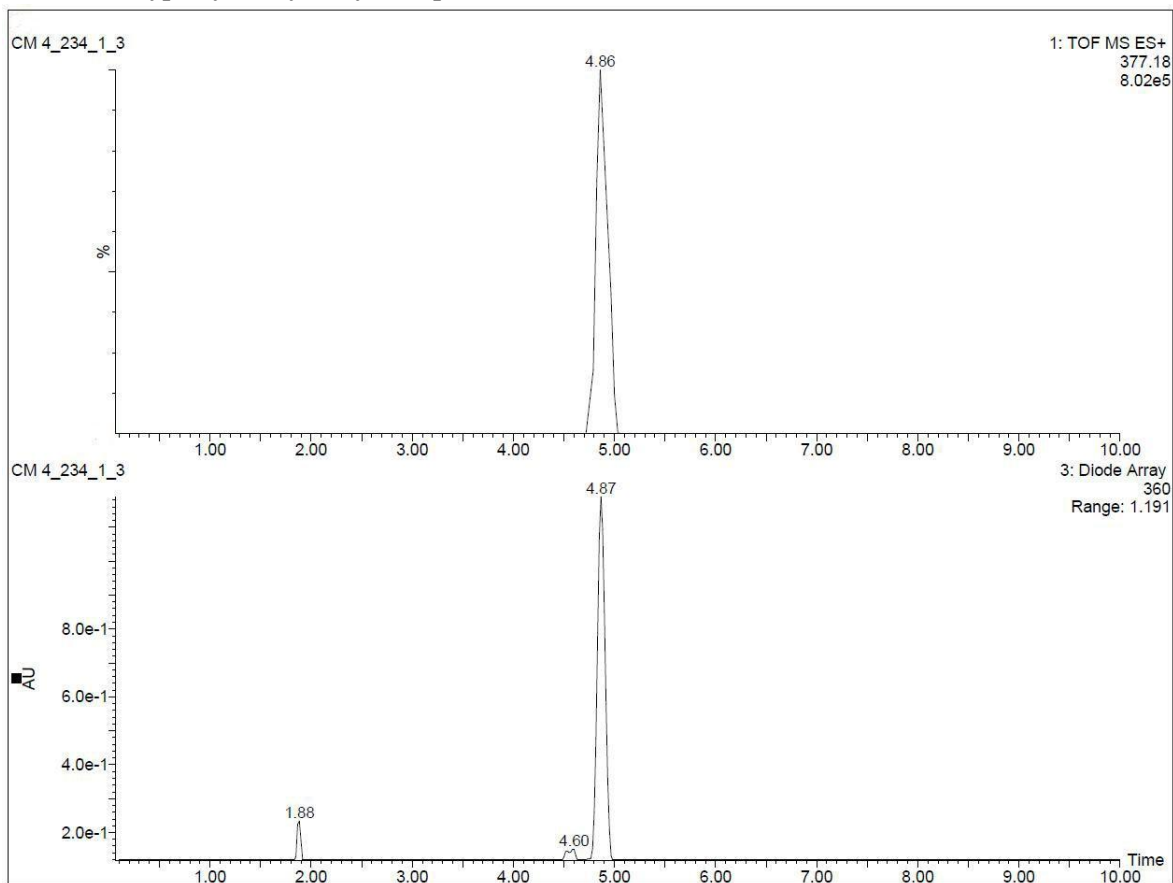



**2-(5'-Cyanopentyl)-7-hydroxyisoellipticinium bromide 28**

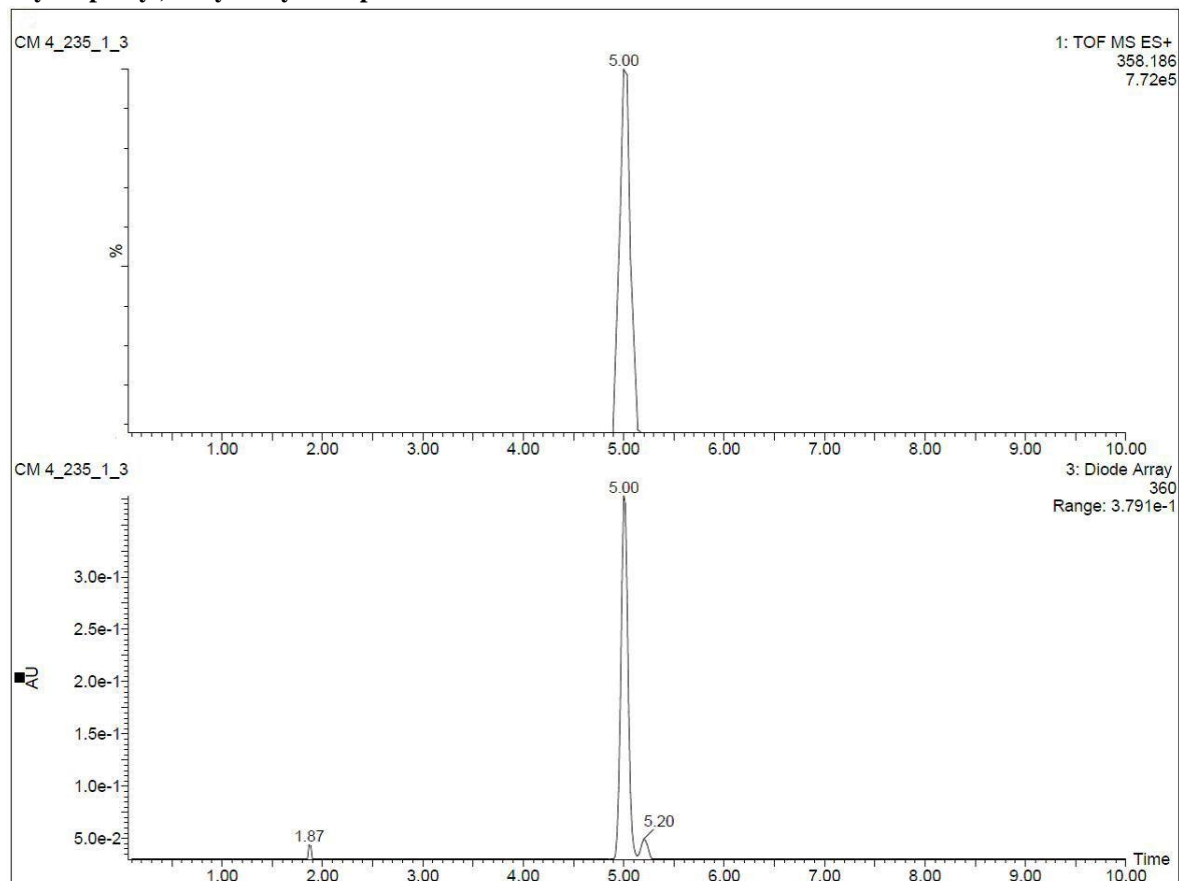

**2-(6'-Carboxamidohexyl)-7-hydroxyisoellipticinium bromide 29**

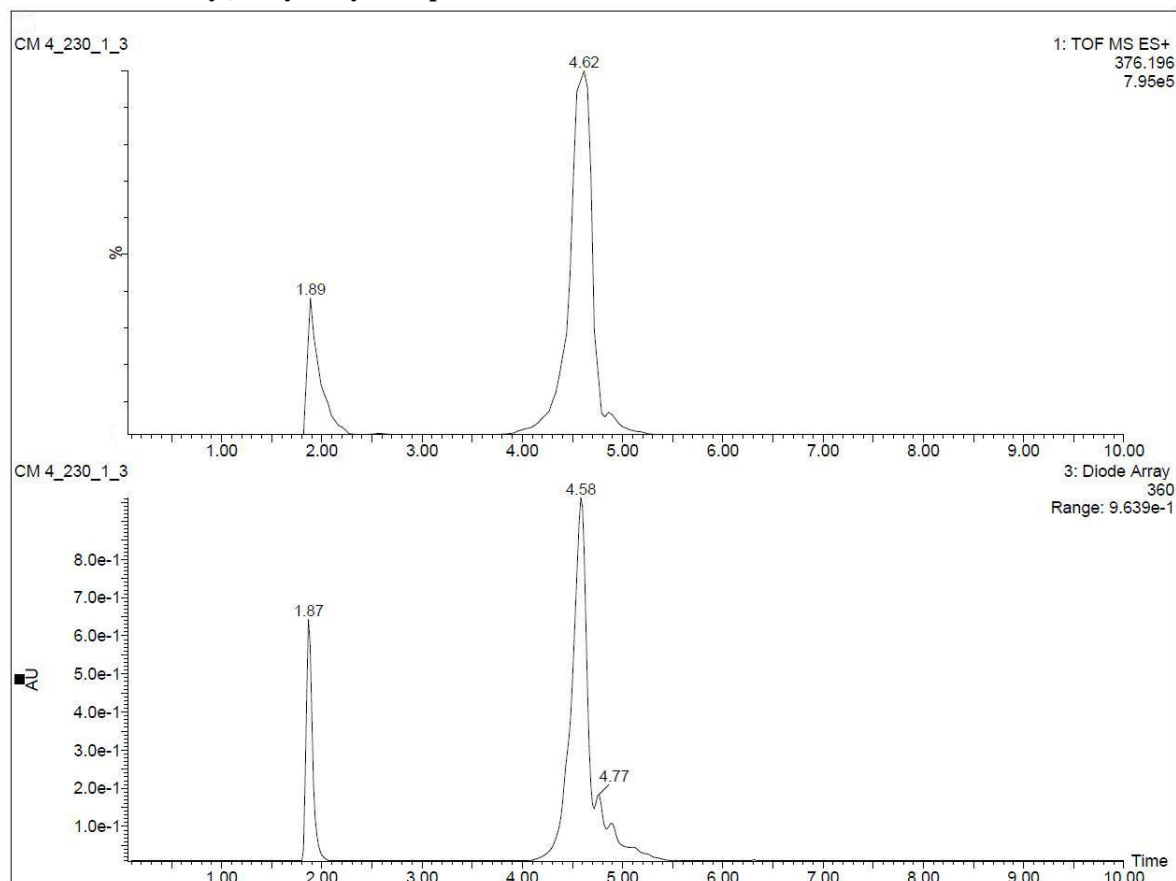

**7-Hydroxy-*N*<sup>2</sup>-(6'-methylsulfonamido-6-oxohexyl) isoellipticinium bromide 30**

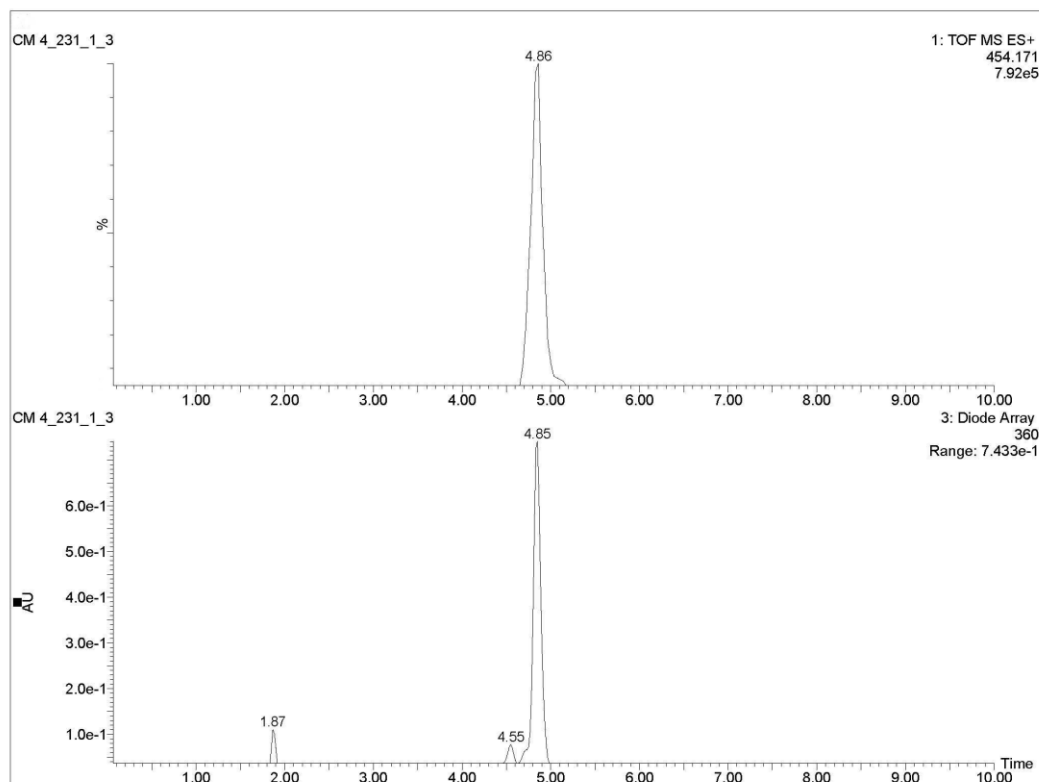

LCMS conditions: Samples were analysed for purity via LCMS using a Waters Alliance 2695 HPLC, Waters 996 photodiode array detector and a Waters LCT Premier TOF mass spectrometer. The samples were injected onto a Waters Atlantis T3 column (150 x 4.6mm, 5µm particle size) using acetonitrile (+0.1% HCOOH) and water (+0.1% HCOOH) as mobile phase over a 10 minute run time at a flow rate of 1 mL/min. The HPLC conditions are as follows: Method A (gradient method) 0mins 10% ACN, 7mins 90% ACN, 9mins 90% ACN, 10mins 10% ACN ; Method B (isocratic method) 100% ACN. Method B was used for samples **9** and **14** with method A used for the others.

#### 4. NCI 60-cell line screen: single-dose data

| Compound number | R <sup>1</sup> | R <sup>2</sup>                                                     | X  | NSC No. <sup>†</sup> |
|-----------------|----------------|--------------------------------------------------------------------|----|----------------------|
| 5               | H              | -                                                                  | -  |                      |
| 6               | CHO            | -                                                                  | -  | 754620               |
| 7               | OH             | -                                                                  | -  | 754619               |
| 8               | OMe            | -                                                                  | -  |                      |
| 16              | H              | Me                                                                 | I  | 754621               |
| 17              | H              | C <sub>3</sub> H <sub>6</sub> CN                                   | Cl |                      |
| 18              | H              | C <sub>4</sub> H <sub>8</sub> CN                                   | Cl |                      |
| 19              | H              | C <sub>5</sub> H <sub>10</sub> CN                                  | Br | 754623               |
| 20              | H              | C <sub>5</sub> H <sub>10</sub> COOH                                | Br | 754622               |
| 21              | H              | C <sub>5</sub> H <sub>10</sub> CONH <sub>2</sub>                   | Br | 754624               |
| 22              | H              | C <sub>5</sub> H <sub>10</sub> CONHSO <sub>2</sub> CH <sub>3</sub> | Br |                      |
| 23              | CHO            | C <sub>5</sub> H <sub>10</sub> COOH                                | Br | 762135               |
| 24              | CHO            | C <sub>5</sub> H <sub>10</sub> CN                                  | Br | 762136               |
| 25              | CHO            | C <sub>5</sub> H <sub>10</sub> CONH <sub>2</sub>                   | Br | 762137               |
| 26              | CHO            | C <sub>5</sub> H <sub>10</sub> CONHSO <sub>2</sub> CH <sub>3</sub> | Br | 762138               |
| 27              | OH             | C <sub>5</sub> H <sub>10</sub> COOH                                | Br |                      |
| 28              | OH             | C <sub>5</sub> H <sub>10</sub> CN                                  | Br | 762117               |
| 29              | OH             | C <sub>5</sub> H <sub>10</sub> CONH <sub>2</sub>                   | Br | 762118               |
| 30              | OH             | C <sub>5</sub> H <sub>10</sub> CONHSO <sub>2</sub> CH <sub>3</sub> | Br | 762119               |

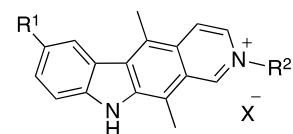

<sup>†</sup>NCI number in green = single dose and five dose data available, NCI no. in blue = single dose only.

5,11-Dimethyl-10*H*-pyrido[3,4-*b*]carbazole-7-carbaldehyde **6**

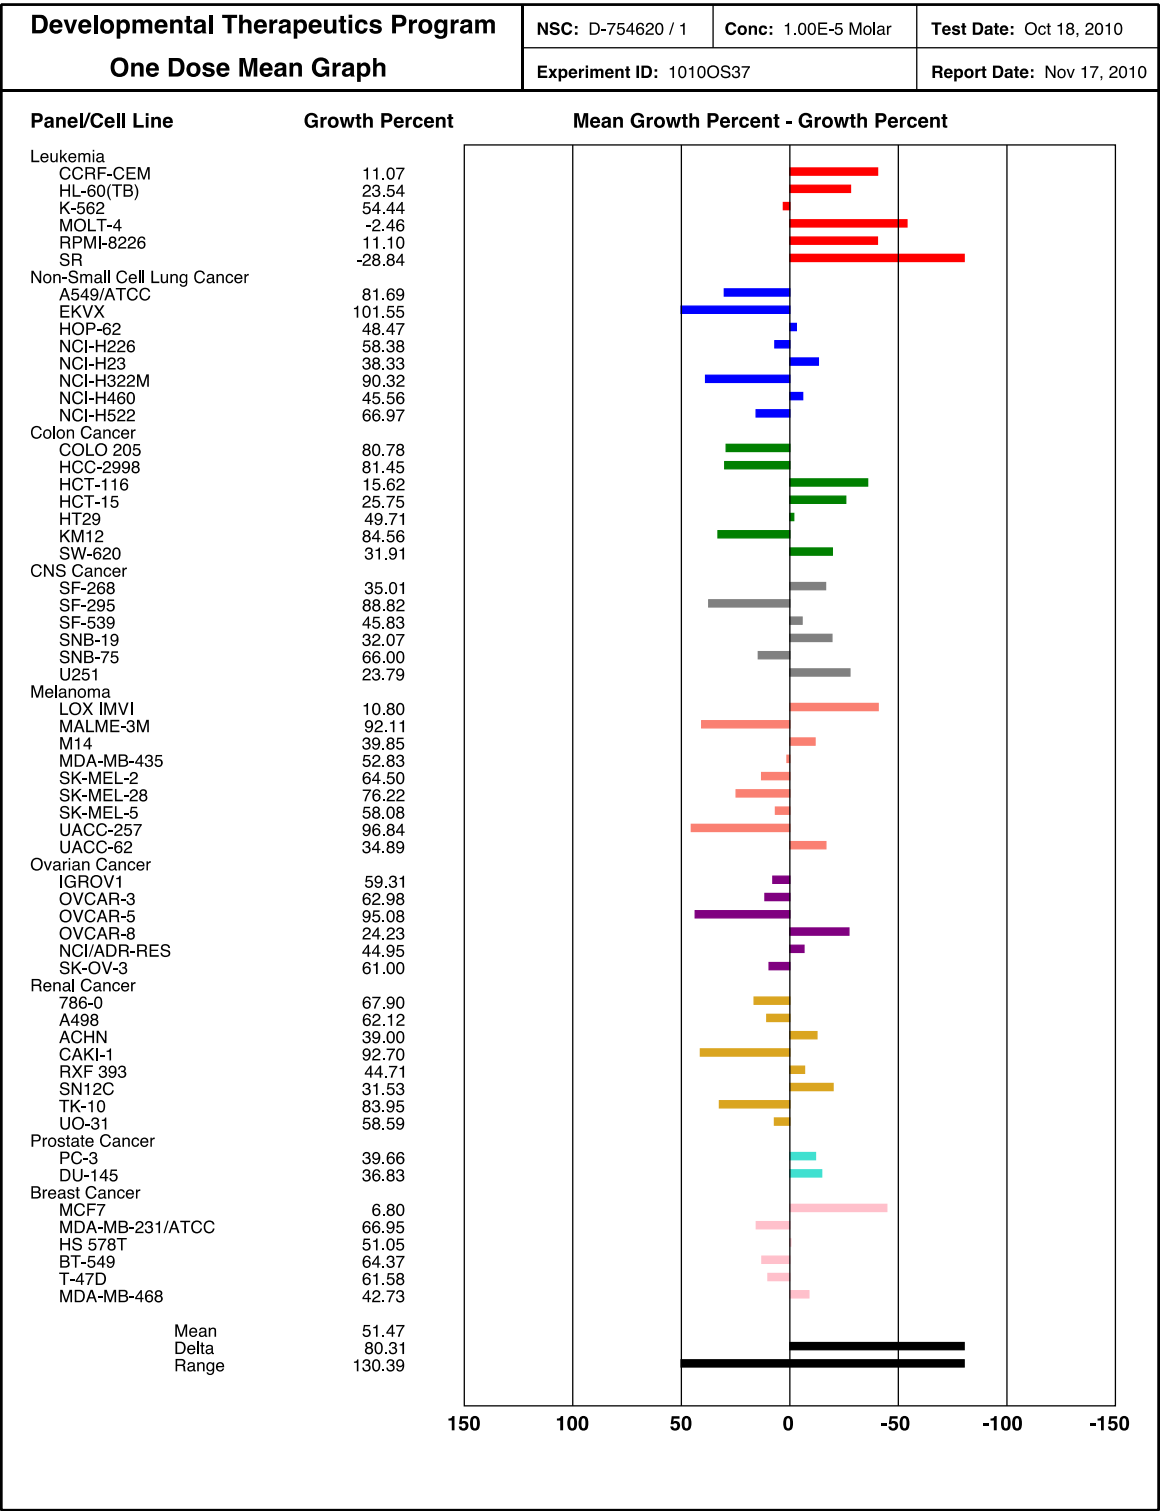

5,11-Dimethyl-10*H*-pyrido[3,4-*b*]carbazol-7-ol 7

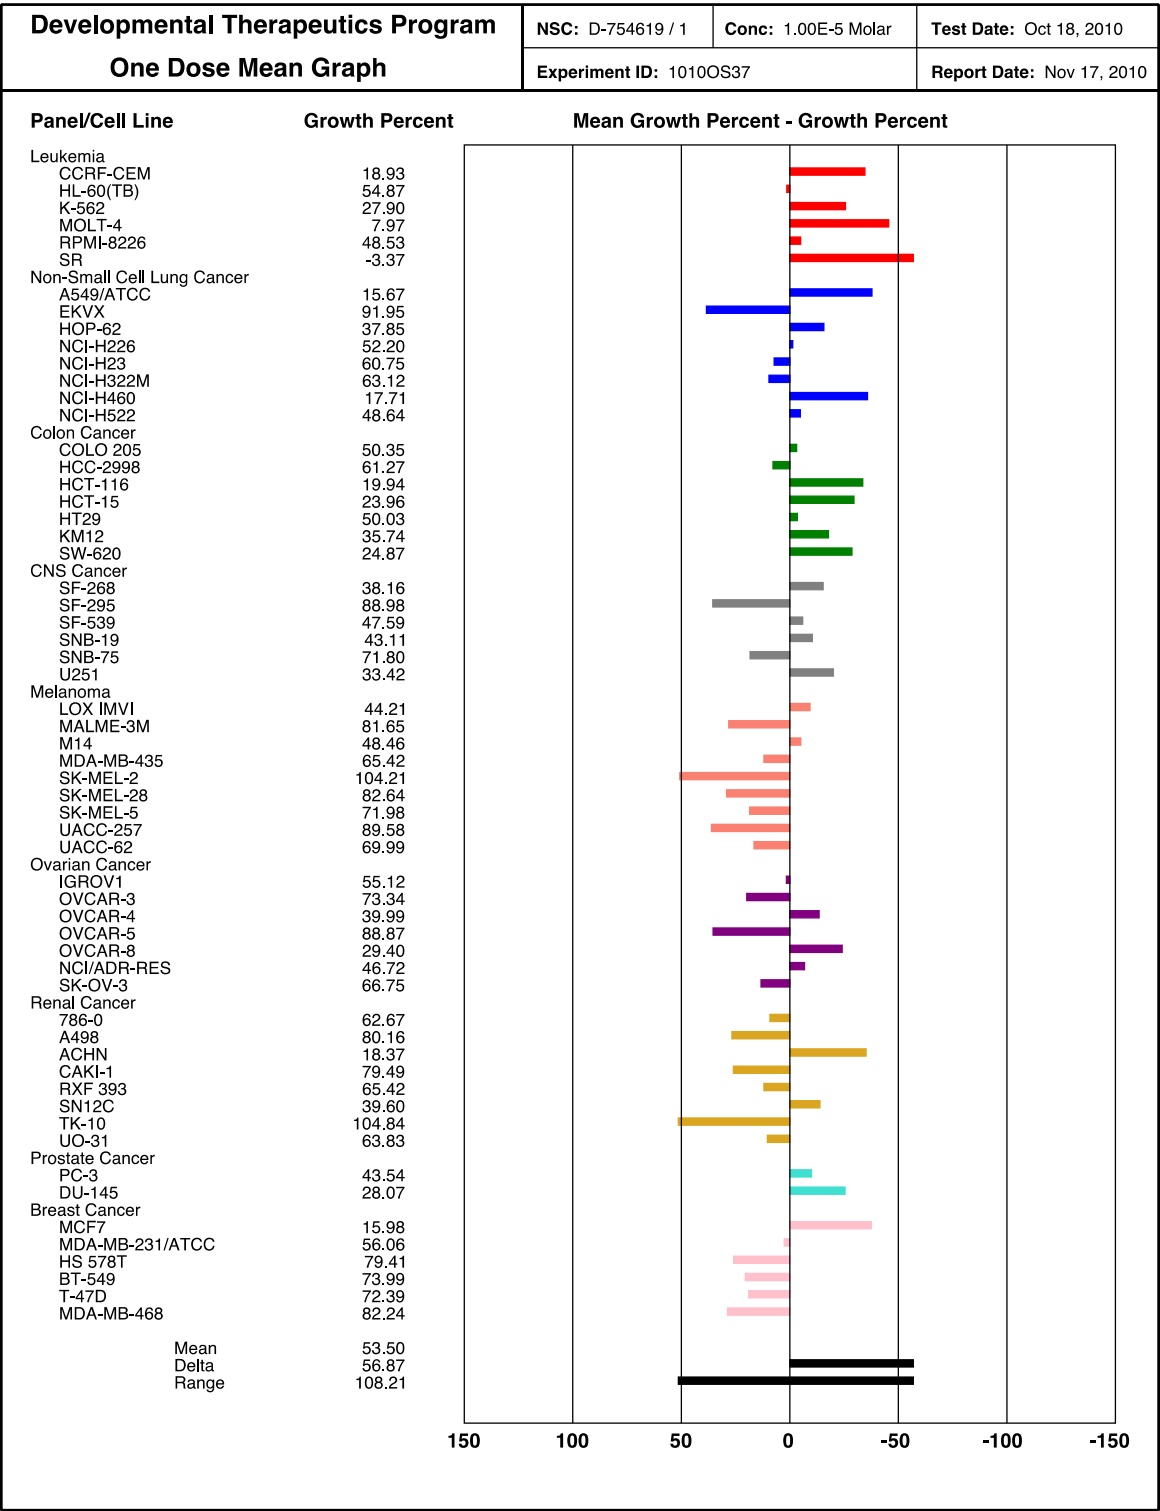

2-Methylisoellipticinium iodide **16**

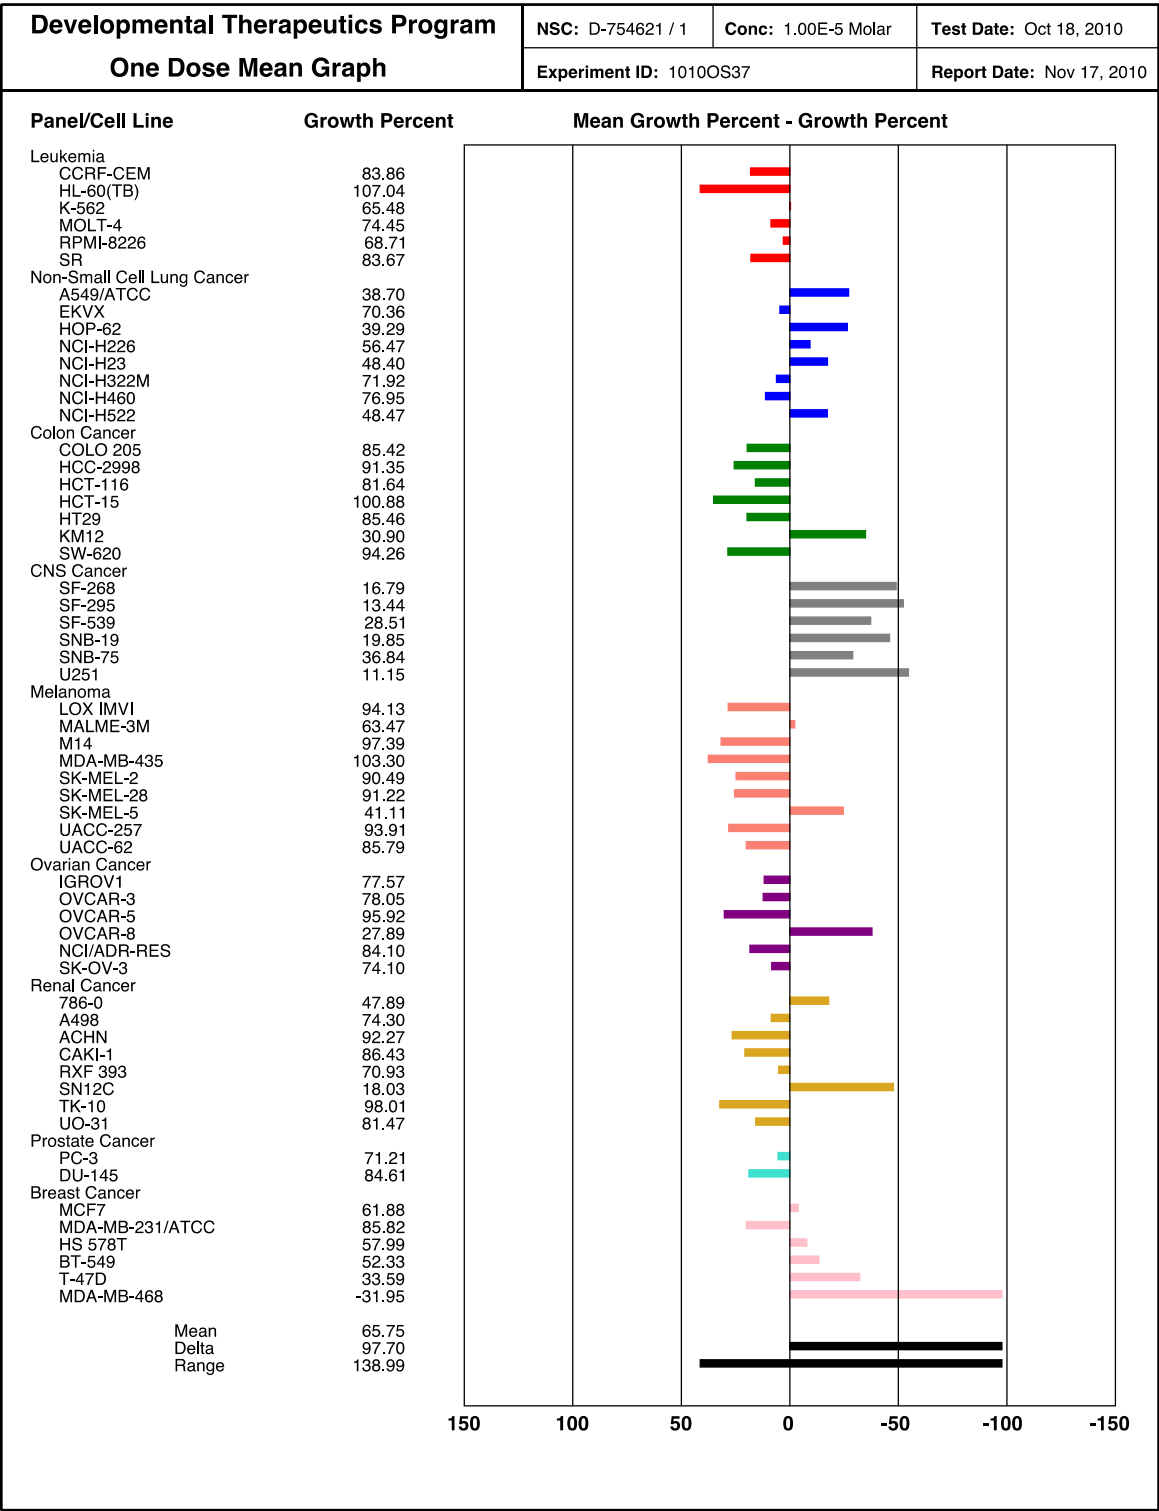

2-(5'-Cyanopentyl)isoellipticinium bromide **19**

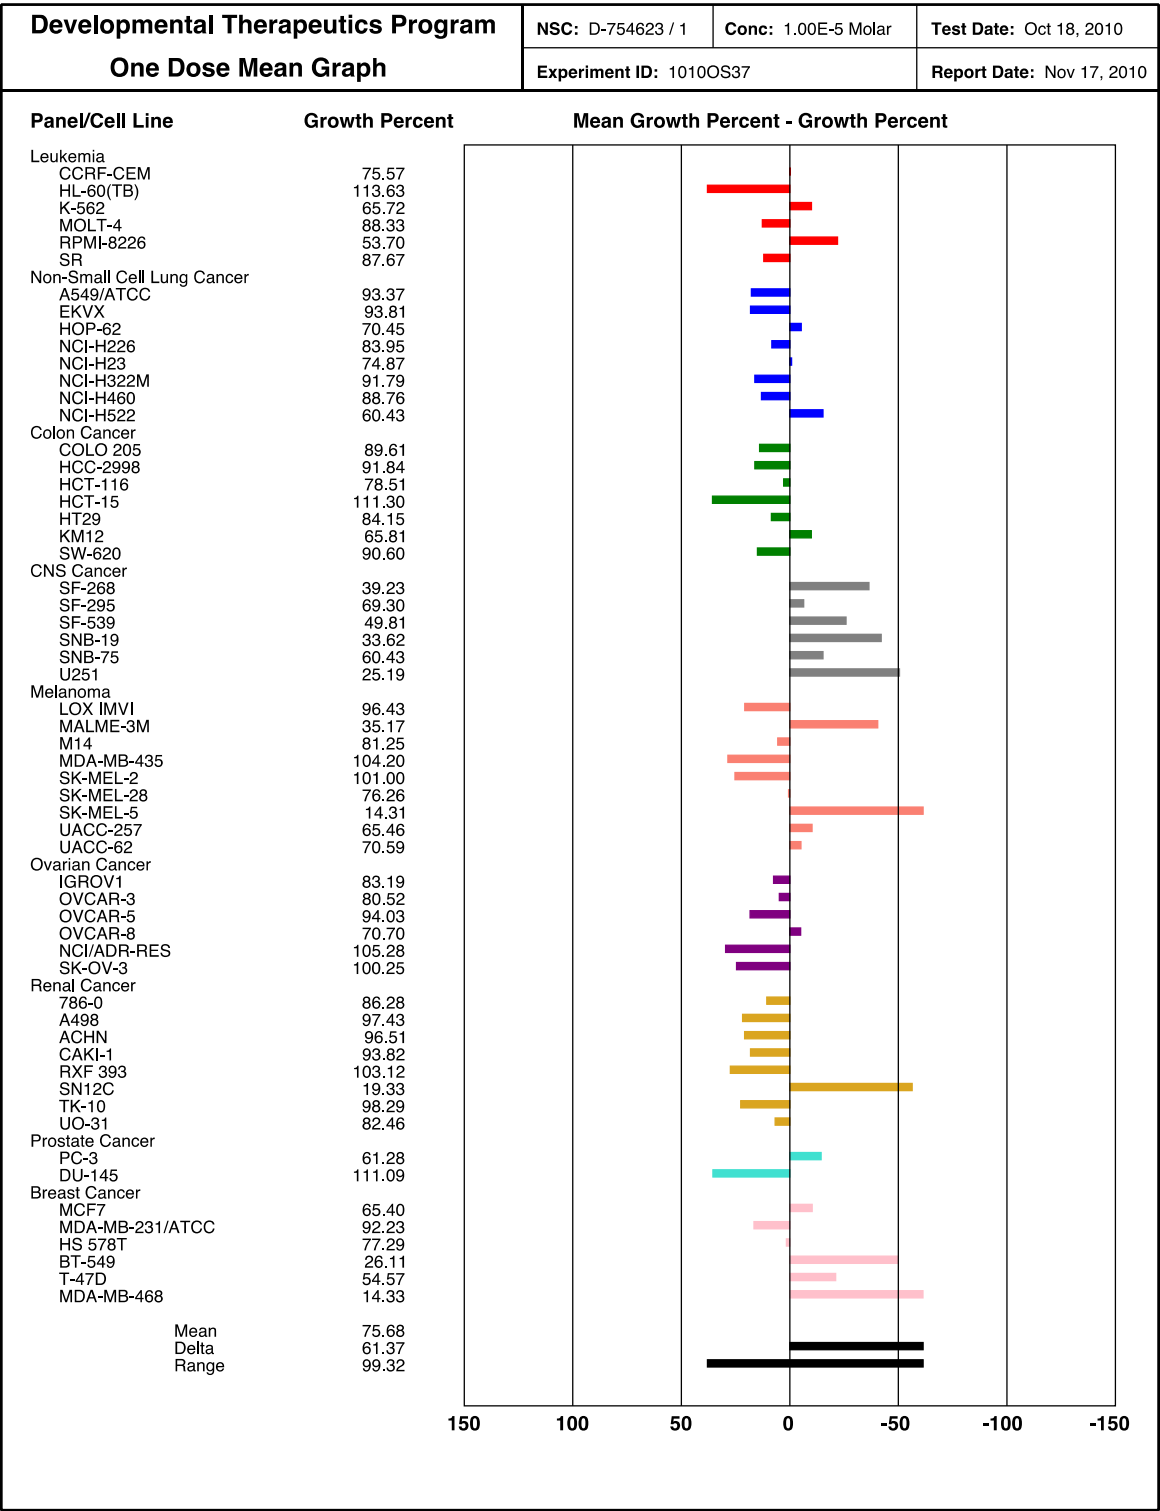

2-(5'-Carboxypentyl)isoellipticinium bromide **20**

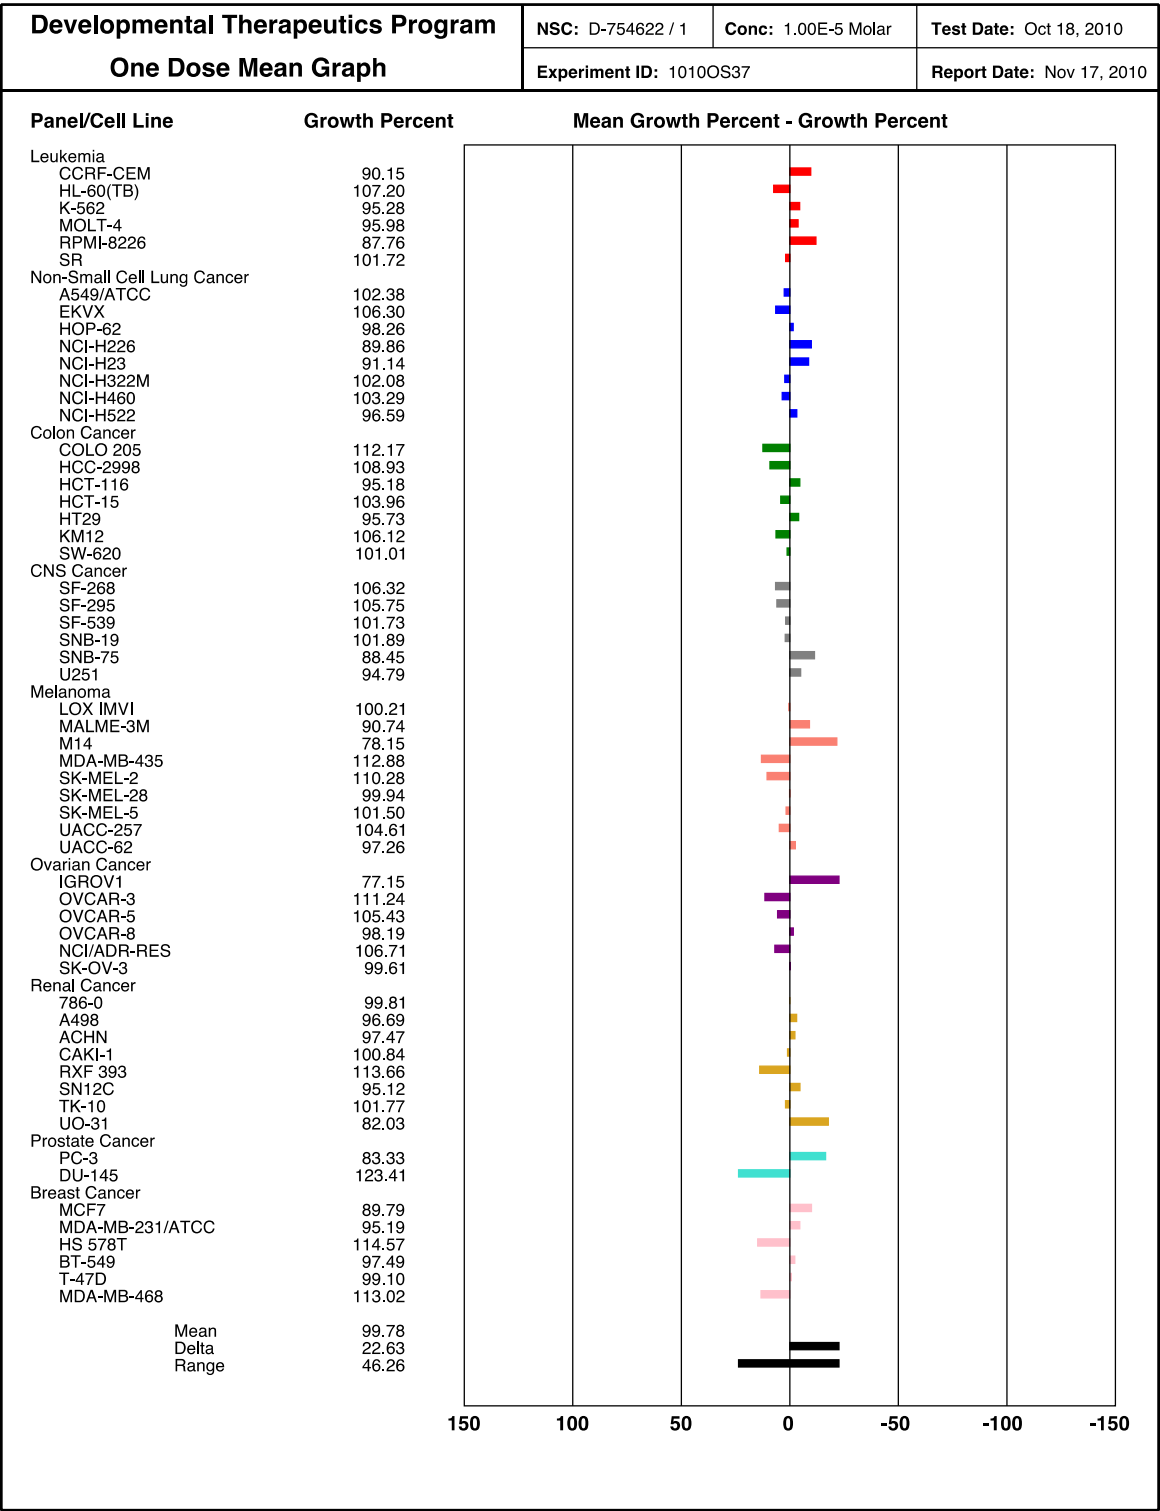



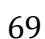

2-(5'-Carboxypentyl)-7-formylisoellipticinium bromide **23**

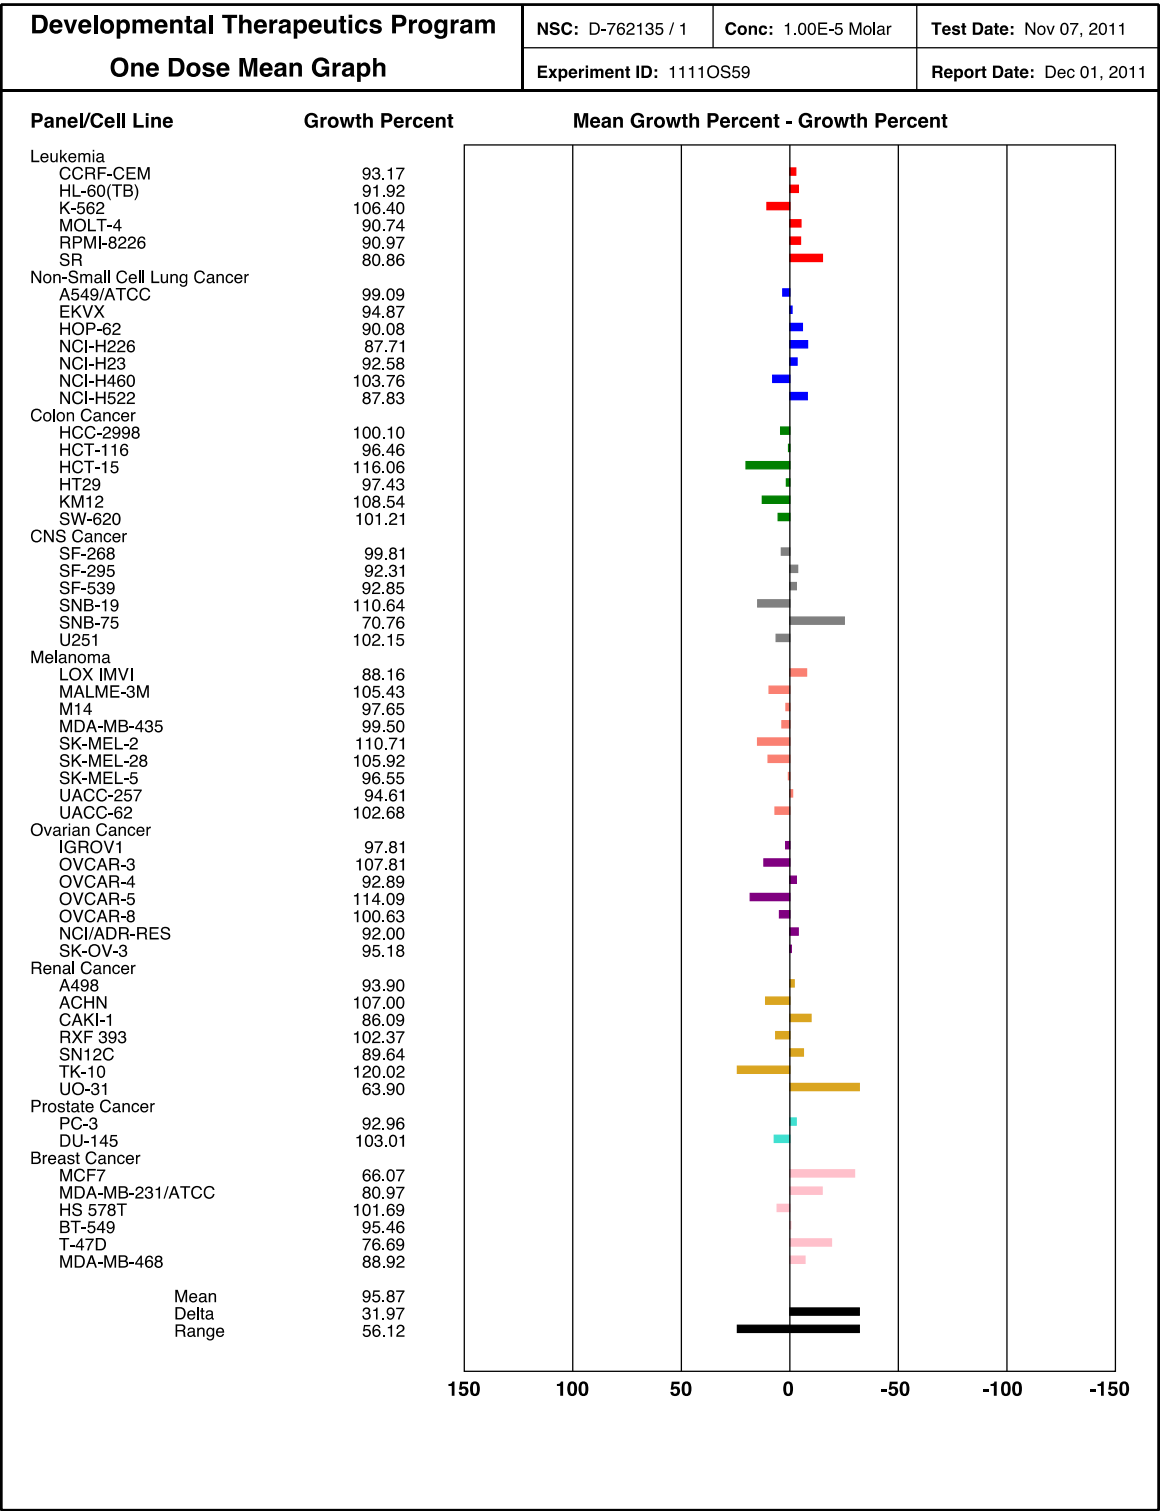

2-(5'-Cyanopentyl)-7-formylisoellipticinium bromide **24**

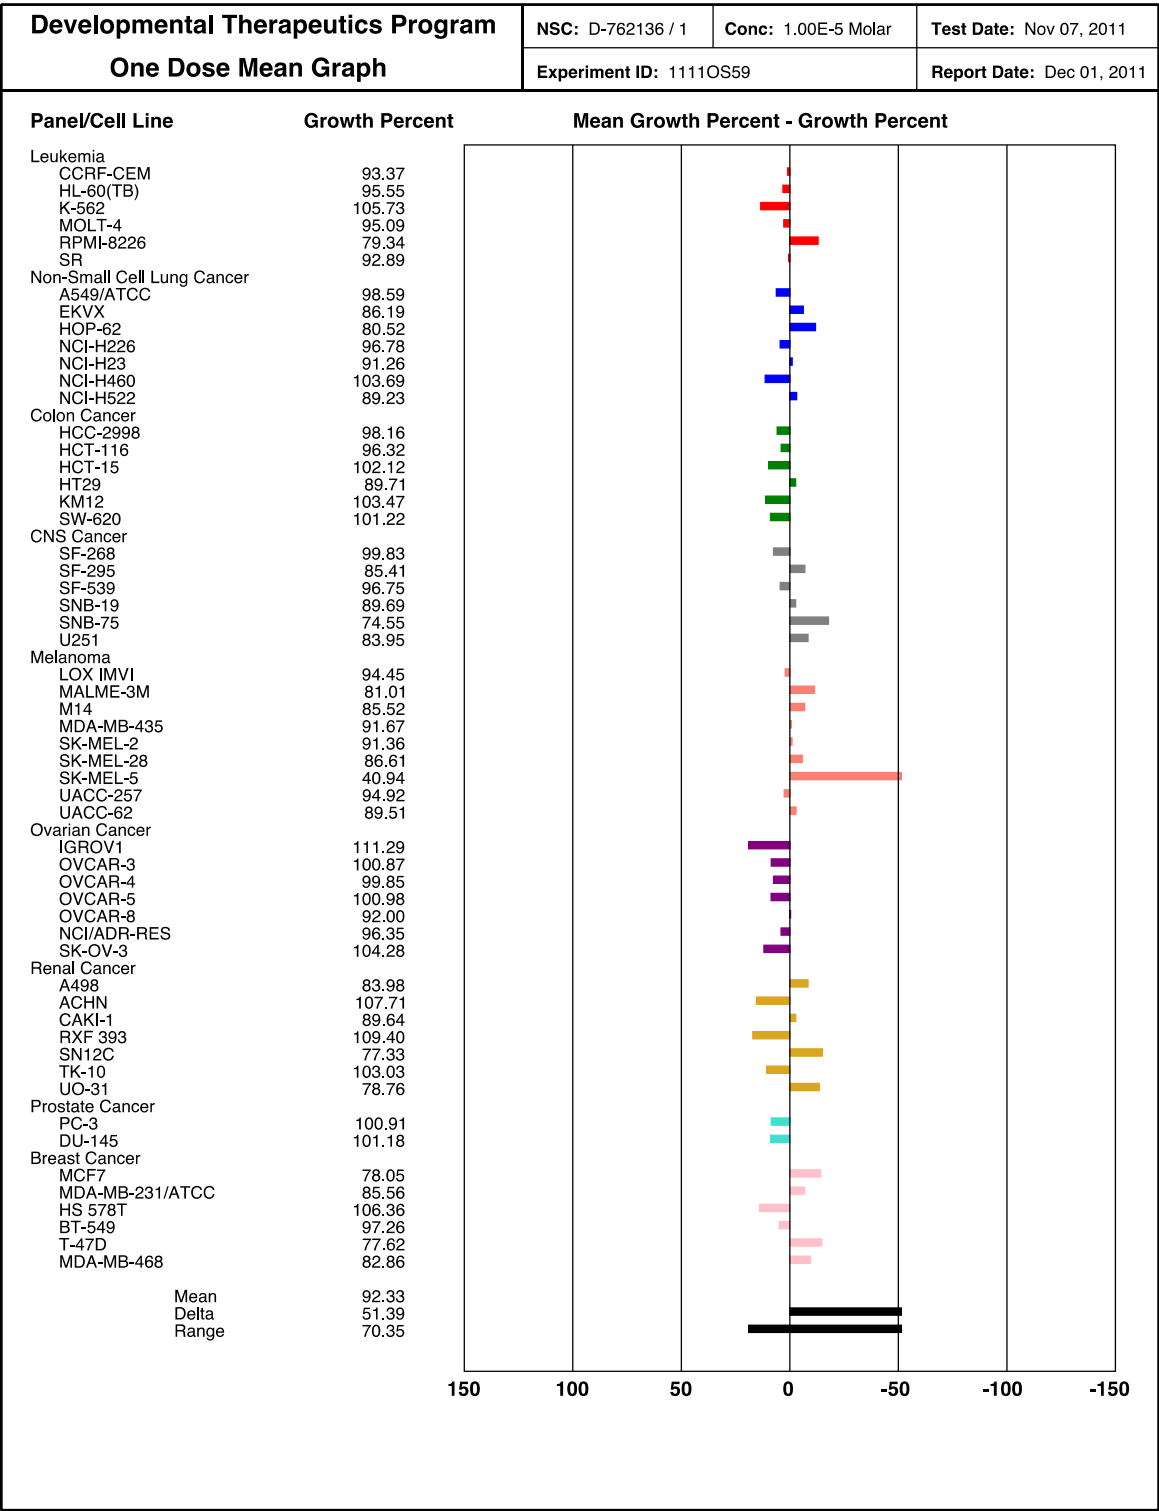

72

7-Formyl-*N*<sup>2</sup>-(6'-methylsulfonamido-6'-oxohexyl)isoellipticinium bromide **26**

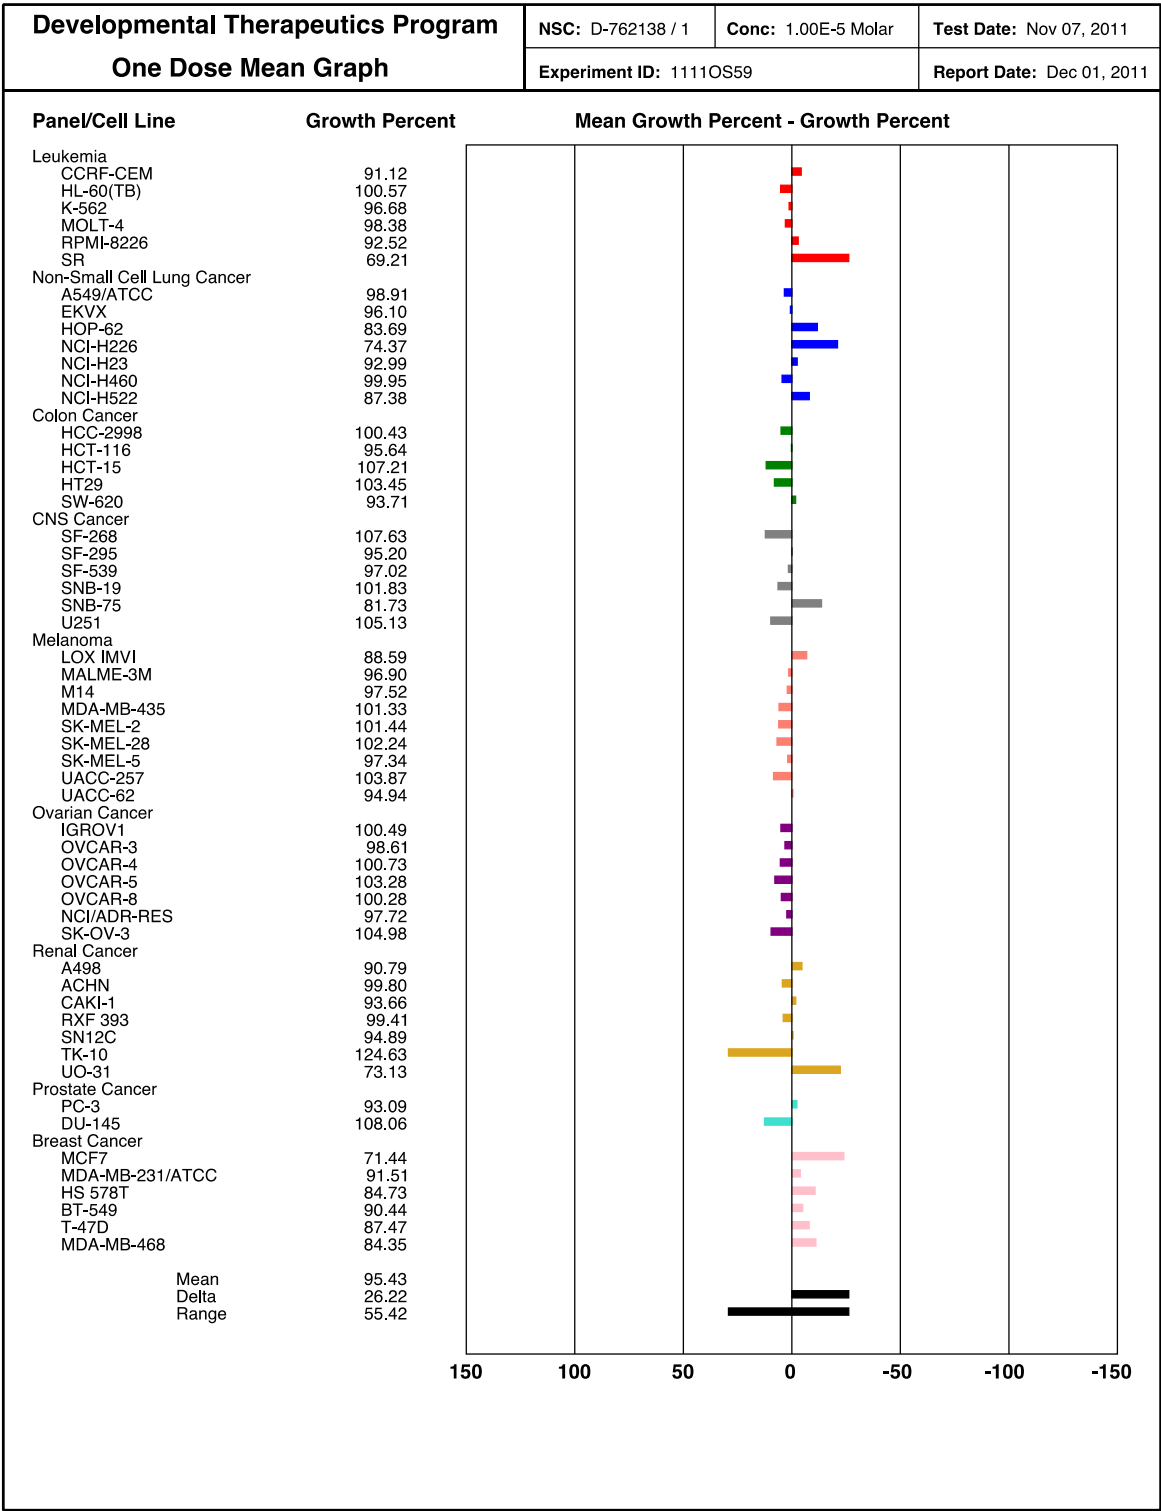

2-(5'-Cyanopentyl)-7-hydroxyisoellipticinium bromide **28**

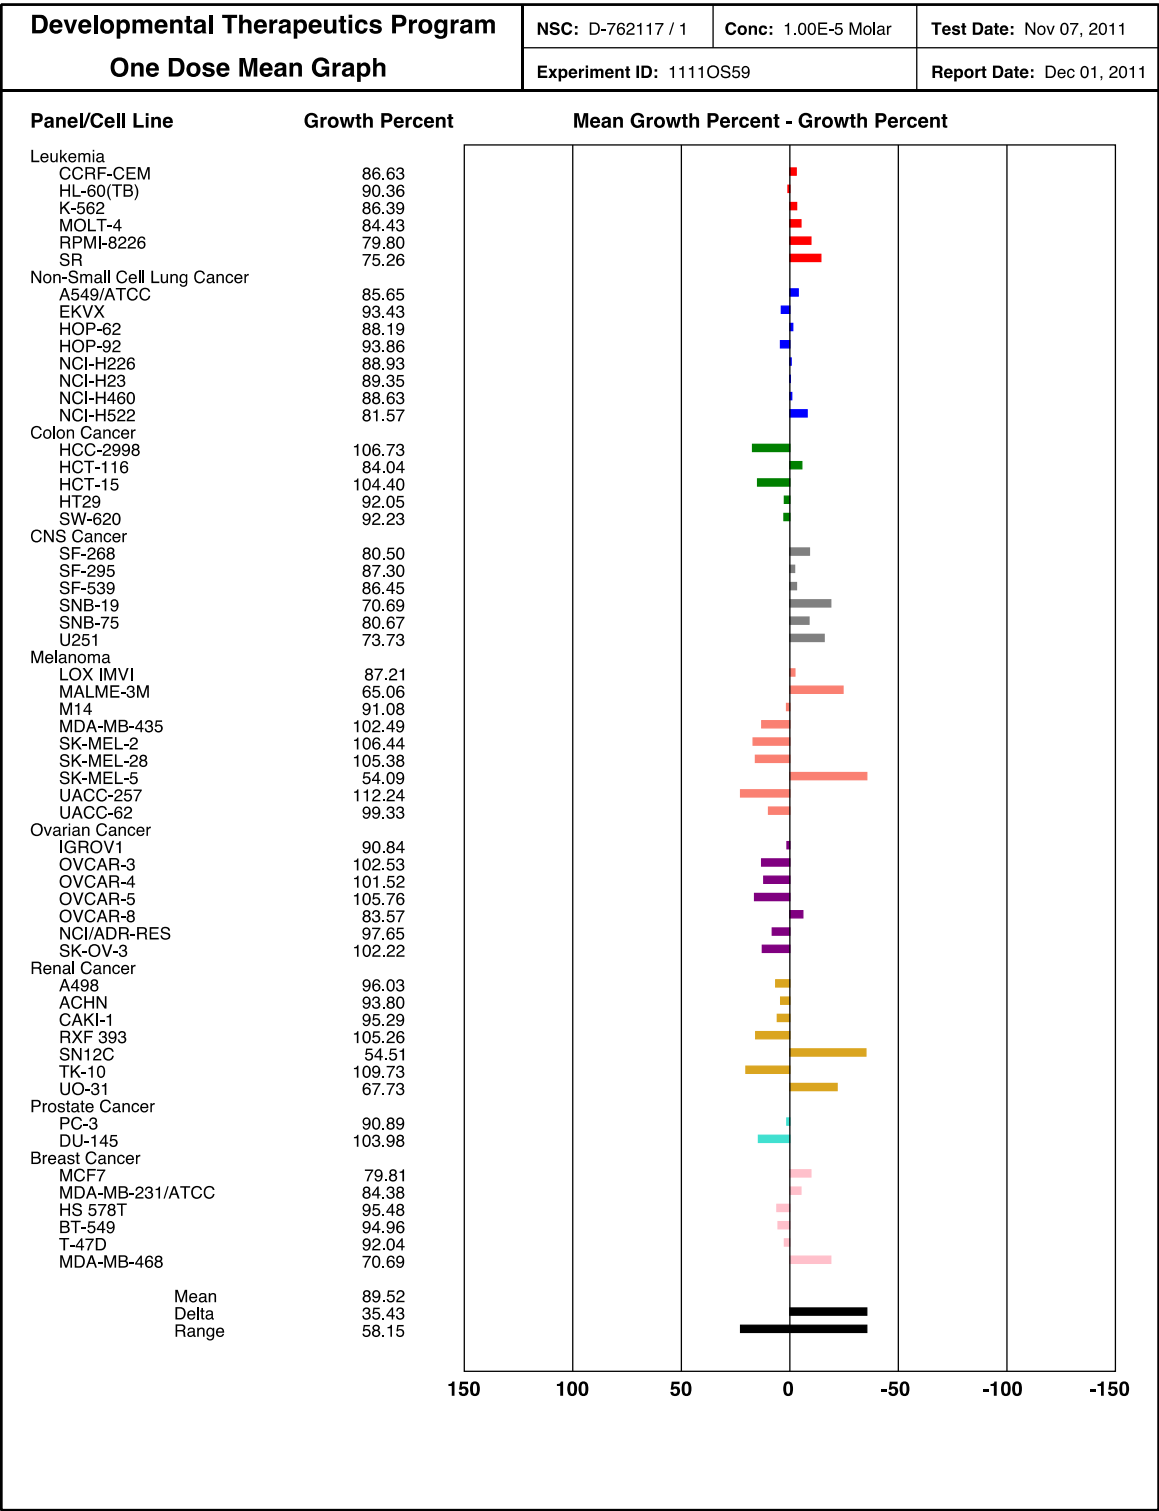

2-(6'-Carboxamidohexyl)-7-hydroxyisoellipticinium bromide **29**

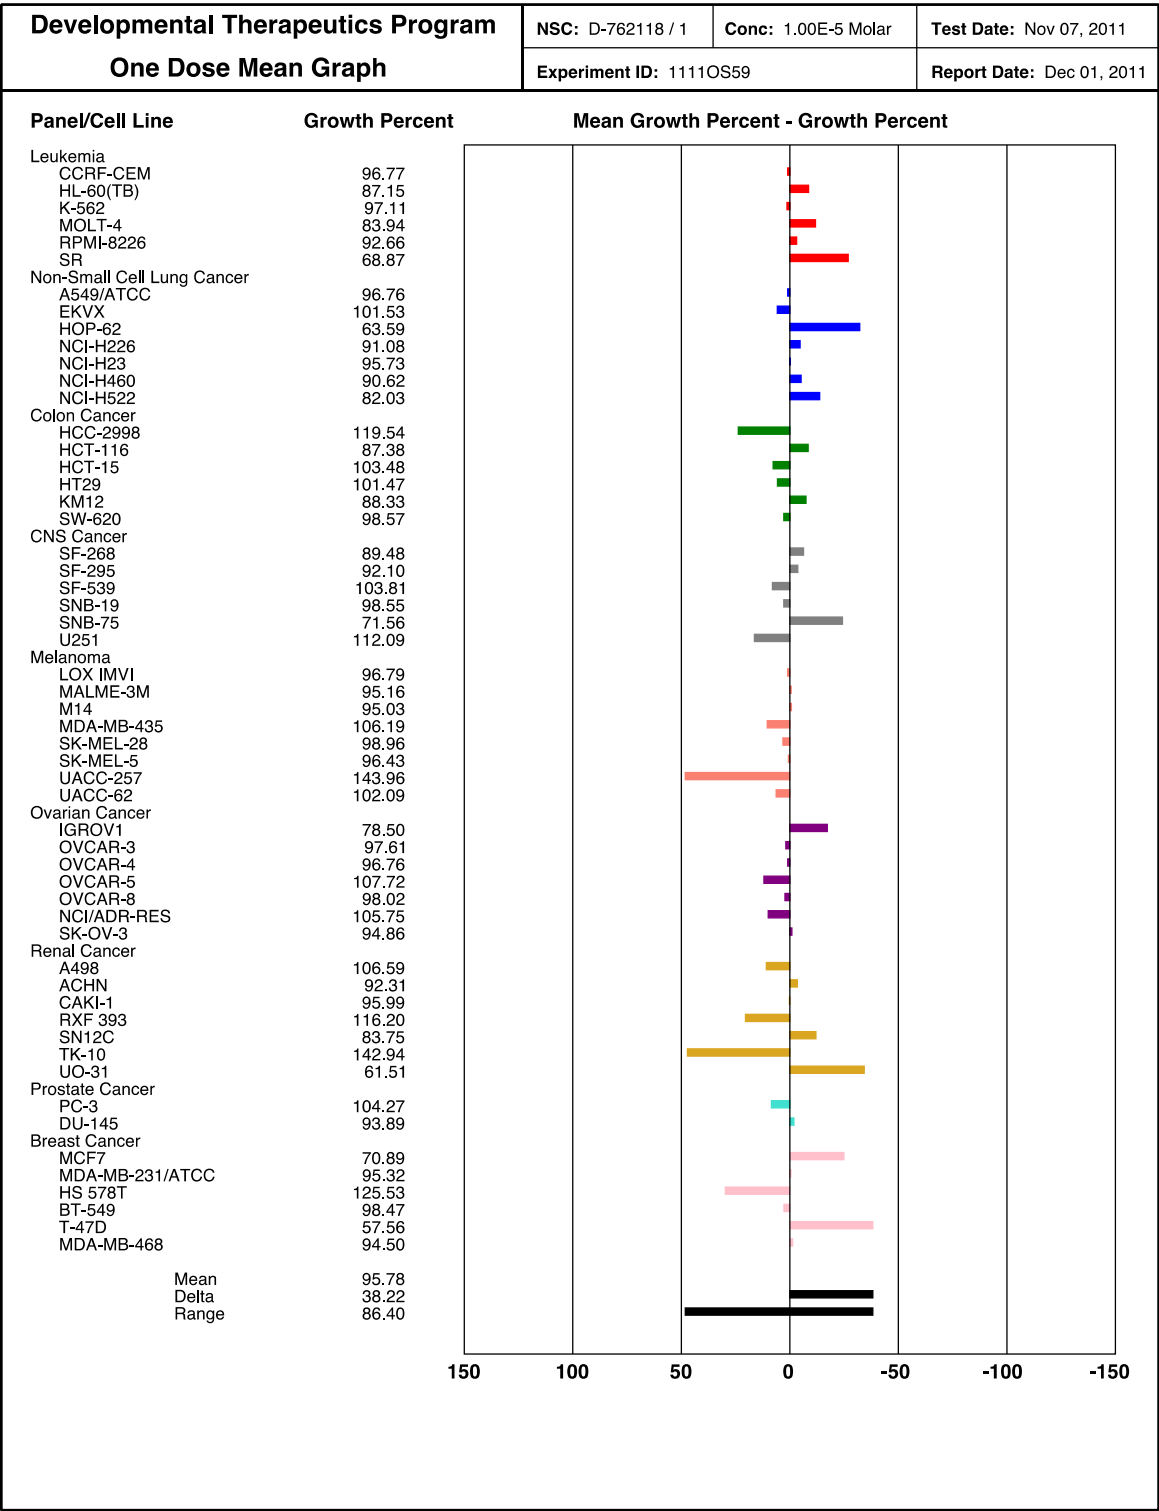

7-Hydroxy-*N*<sup>2</sup>-(6'-methylsulfonamido-6-oxohexyl)isoellipticinium bromide **30**

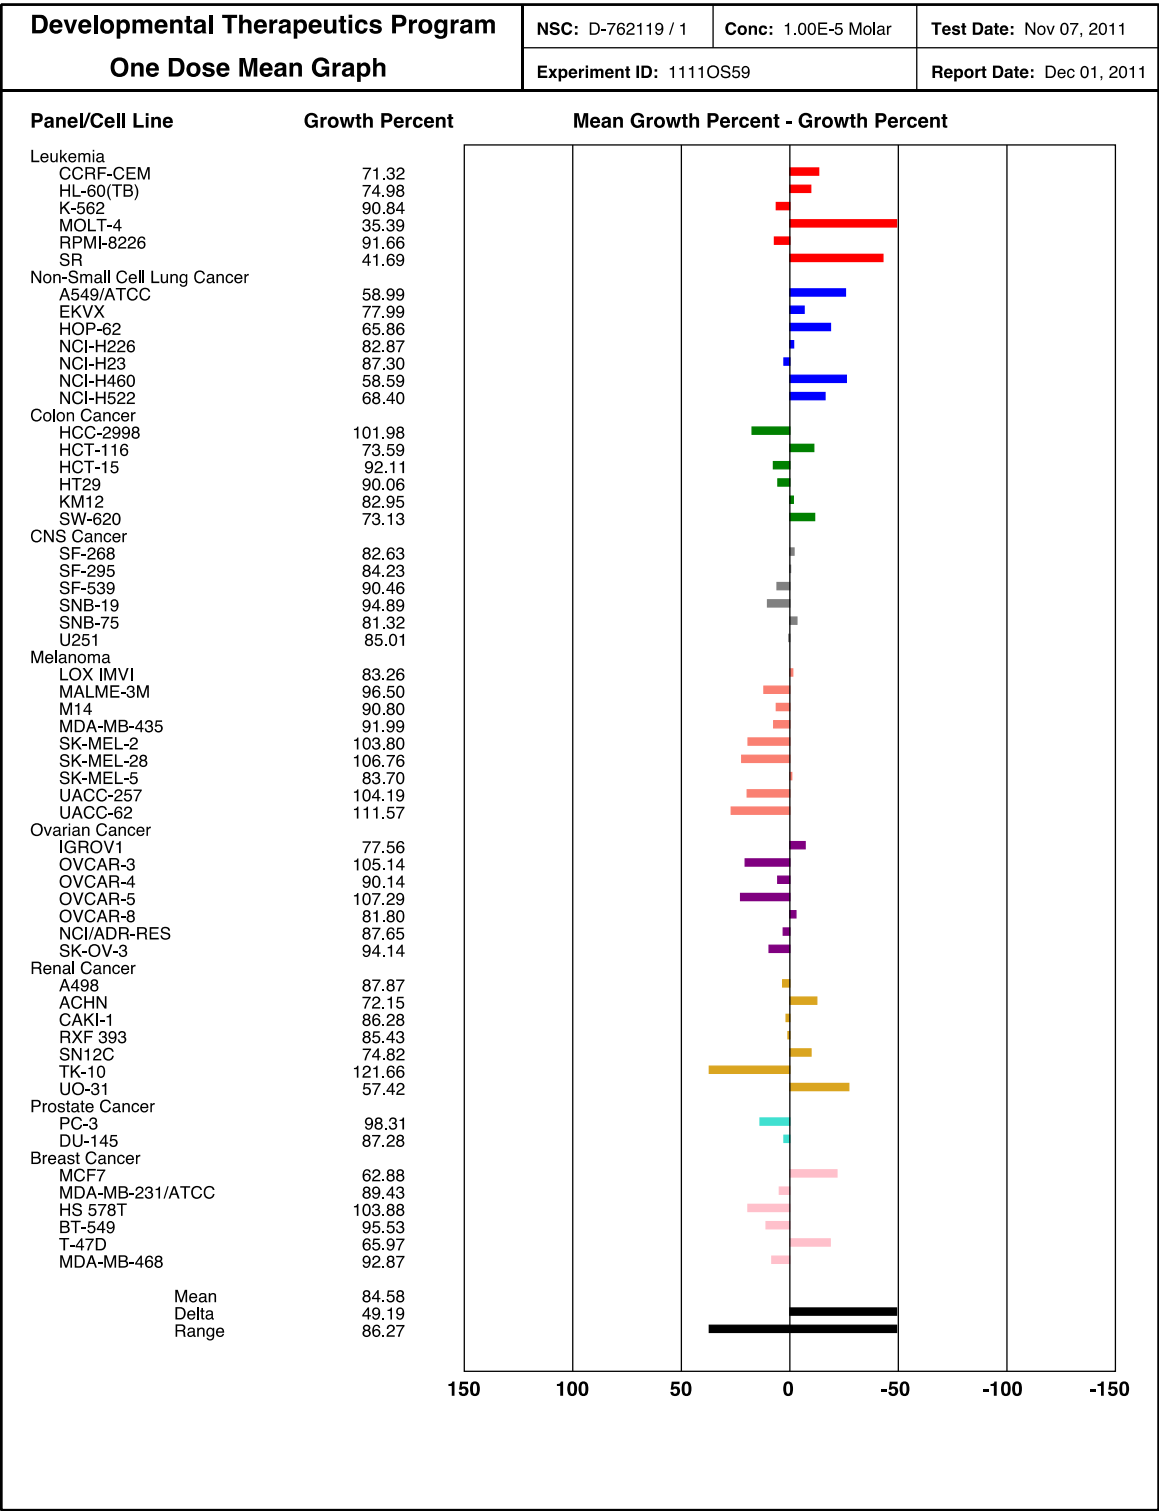



5. NCI 60- cell line screen: five-dose data

5,11-Dimethyl-10*H*-pyrido[3,4-*b*]carbazole-7-carbaldehyde **6**

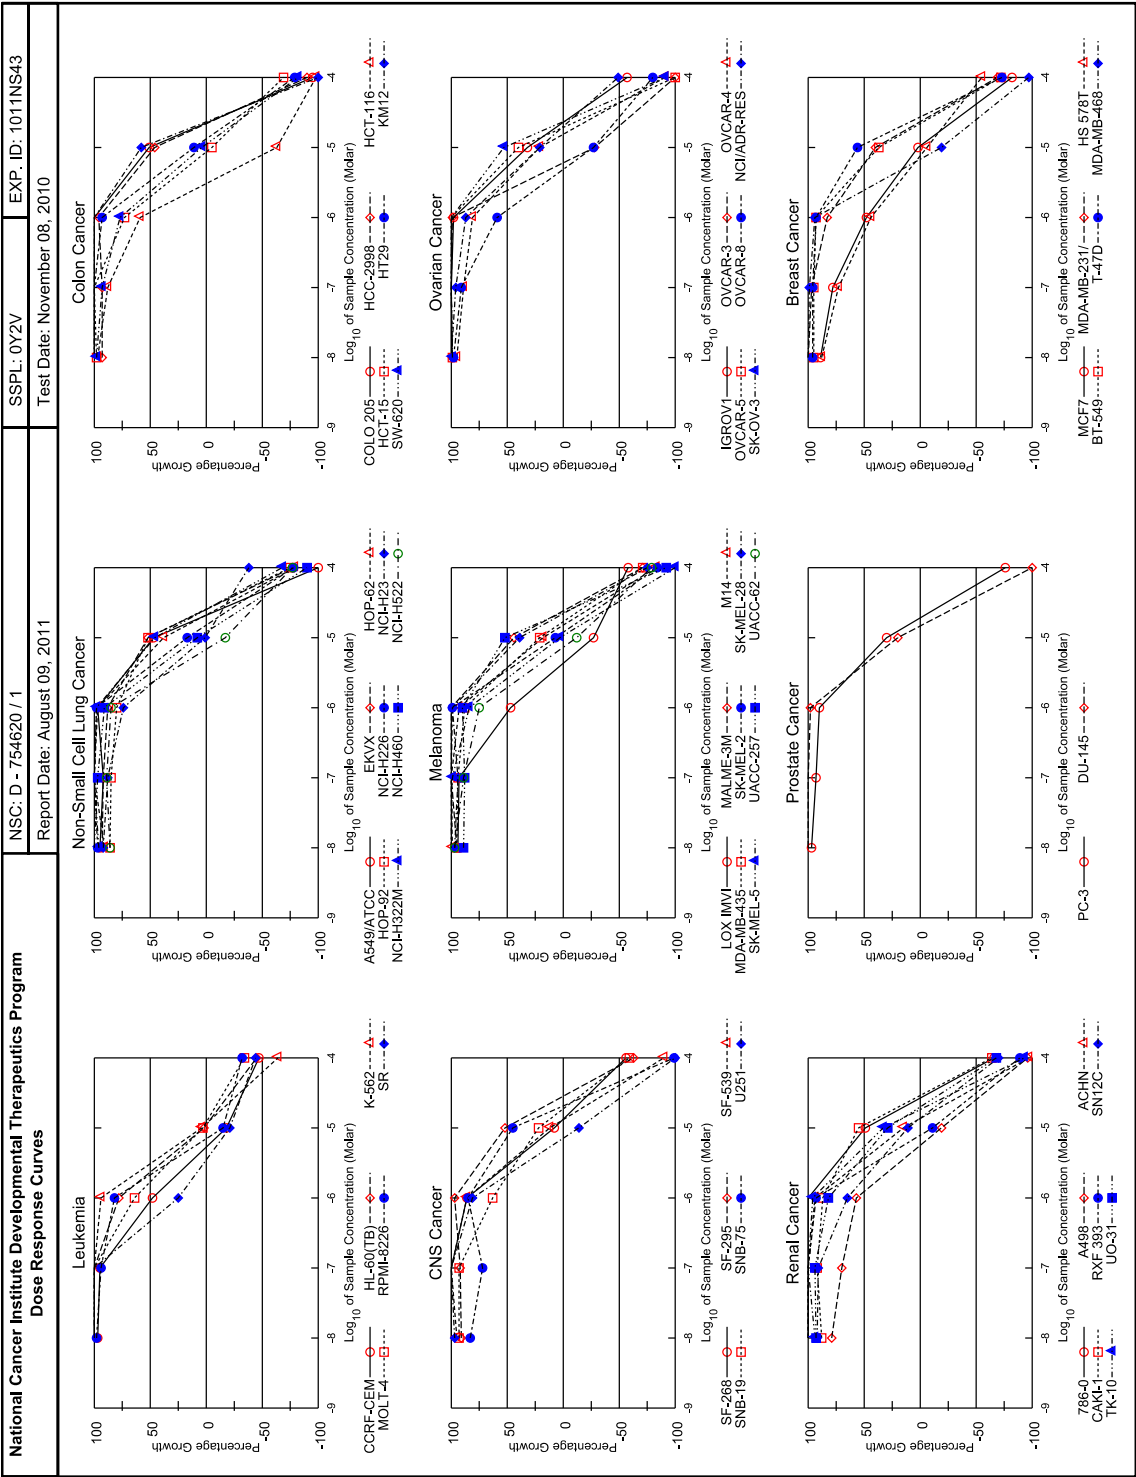

5,11-Dimethyl-10*H*-pyrido[3,4-*b*]carbazole-7-carbaldehyde **6**

| National Cancer Institute Developmental Therapeutics Program<br>In-Vitro Testing Results |           |       |       |                                       |       |       |        |                |      |      |      |               |         |         |           |
|------------------------------------------------------------------------------------------|-----------|-------|-------|---------------------------------------|-------|-------|--------|----------------|------|------|------|---------------|---------|---------|-----------|
| NSC : D - 754620 / 1                                                                     |           |       |       | Experiment ID : 1011NS43              |       |       |        | Test Type : 08 |      |      |      | Units : Molar |         |         |           |
| Report Date : August 09, 2011                                                            |           |       |       | Test Date : November 08, 2010         |       |       |        | QNS :          |      |      |      | MC :          |         |         |           |
| COMI : CM-3-214-5 (98578)                                                                |           |       |       | Stain Reagent : SRB Dual-Pass Related |       |       |        | SSPL : 0Y2V    |      |      |      |               |         |         |           |
| Log10 Concentration                                                                      |           |       |       |                                       |       |       |        |                |      |      |      |               |         |         |           |
| Panel/Cell Line                                                                          | Time Zero | Ctrl  | -8.0  | -7.0                                  | -6.0  | -5.0  | -4.0   | -8.0           | -7.0 | -6.0 | -5.0 | -4.0          | GI50    | TGI     | LC50      |
| Leukemia                                                                                 |           |       |       |                                       |       |       |        |                |      |      |      |               |         |         |           |
| CCRF-CEM                                                                                 | 0.564     | 2.353 | 2.305 | 2.267                                 | 1.417 | 0.465 | 0.298  | 97             | 95   | 48   | -18  | -47           | 8.94E-7 | 5.38E-6 | > 1.00E-4 |
| HL-60(TB)                                                                                | 0.664     | 2.187 | 2.403 | 2.475                                 | 1.846 | 0.696 | 0.367  | 114            | 119  | 78   | 2    | -45           | 2.32E-6 | 1.11E-5 | > 1.00E-4 |
| K-562                                                                                    | 0.166     | 1.173 | 1.190 | 1.173                                 | 1.116 | 0.203 | 0.060  | 102            | 100  | 94   | 4    | -64           | 3.08E-6 | 1.13E-5 | 6.23E-5   |
| MOLT-4                                                                                   | 0.546     | 1.978 | 2.047 | 2.131                                 | 1.460 | 0.591 | 0.359  | 105            | 111  | 64   | 3    | -34           | 1.69E-6 | 1.21E-5 | > 1.00E-4 |
| RPMI-8226                                                                                | 1.152     | 2.873 | 2.842 | 2.779                                 | 2.556 | 0.980 | 0.782  | 98             | 94   | 82   | -15  | -32           | 2.12E-6 | 7.00E-6 | > 1.00E-4 |
| SR                                                                                       | 0.382     | 1.759 | 1.772 | 1.830                                 | 0.725 | 0.302 | 0.215  | 101            | 105  | 25   | -21  | -44           | 4.87E-7 | 3.49E-6 | > 1.00E-4 |
| Non-Small Cell Lung Cancer                                                               |           |       |       |                                       |       |       |        |                |      |      |      |               |         |         |           |
| A549/ATCC                                                                                | 0.317     | 1.376 | 1.322 | 1.294                                 | 1.349 | 0.816 | -0.022 | 95             | 92   | 97   | 47   | -100          | 8.76E-6 | 2.09E-5 | 4.57E-5   |
| EKVX                                                                                     | 0.655     | 1.604 | 1.540 | 1.528                                 | 1.487 | 1.151 | 0.152  | 93             | 92   | 88   | 52   | -77           | 1.04E-5 | 2.54E-5 | 6.20E-5   |
| HOP-62                                                                                   | 0.492     | 1.553 | 1.453 | 1.610                                 | 1.517 | 0.891 | 0.102  | 91             | 105  | 97   | 38   | -79           | 6.17E-6 | 2.10E-5 | 5.61E-5   |
| HOP-92                                                                                   | 0.992     | 1.420 | 1.360 | 1.356                                 | 1.336 | 1.215 | 0.249  | 86             | 85   | 80   | 52   | -75           | 1.04E-5 | 2.57E-5 | 6.36E-5   |
| NCI-H226                                                                                 | 0.666     | 1.352 | 1.330 | 1.361                                 | 1.339 | 0.782 | 0.146  | 97             | 101  | 98   | 17   | -78           | 3.91E-6 | 1.51E-5 | 5.06E-5   |
| NCI-H23                                                                                  | 0.636     | 1.907 | 1.802 | 1.758                                 | 1.572 | 0.650 | 0.393  | 92             | 88   | 74   | 1    | -38           | 2.12E-6 | 1.07E-5 | > 1.00E-4 |
| NCI-H322M                                                                                | 0.668     | 1.386 | 1.356 | 1.434                                 | 1.370 | 0.998 | 0.214  | 96             | 107  | 98   | 46   | -68           | 8.35E-6 | 2.53E-5 | 6.95E-5   |
| NCI-H460                                                                                 | 0.257     | 2.051 | 2.097 | 1.993                                 | 1.888 | 0.395 | 0.026  | 103            | 97   | 91   | 8    | -90           | 3.10E-6 | 1.20E-5 | 3.90E-5   |
| NCI-H522                                                                                 | 0.577     | 1.287 | 1.186 | 1.208                                 | 1.181 | 0.477 | 0.132  | 86             | 89   | 85   | -17  | -77           | 2.20E-6 | 6.76E-6 | 3.51E-5   |
| Colon Cancer                                                                             |           |       |       |                                       |       |       |        |                |      |      |      |               |         |         |           |
| COLO 205                                                                                 | 0.282     | 1.111 | 1.138 | 1.196                                 | 1.152 | 0.703 | 0.016  | 103            | 110  | 105  | 51   | -95           | 1.01E-5 | 2.24E-5 | 4.94E-5   |
| HCC-2998                                                                                 | 0.511     | 1.228 | 2.021 | 2.022                                 | 2.058 | 1.256 | 0.053  | 93             | 93   | 96   | 46   | -90           | 8.33E-6 | 2.19E-5 | 5.10E-5   |
| HCT-116                                                                                  | 0.244     | 1.817 | 1.767 | 1.629                                 | 1.175 | 0.092 | 0.005  | 97             | 88   | 59   | -63  | -98           | 1.19E-6 | 3.06E-6 | 7.89E-6   |
| HCT-15                                                                                   | 0.247     | 1.416 | 1.390 | 1.421                                 | 1.102 | 0.234 | 0.076  | 98             | 100  | 73   | -5   | -69           | 1.97E-6 | 8.52E-6 | 4.99E-5   |
| HT29                                                                                     | 0.205     | 1.040 | 1.048 | 1.071                                 | 0.983 | 0.295 | 0.044  | 101            | 104  | 93   | 11   | -79           | 3.34E-6 | 1.32E-5 | 4.77E-5   |
| KM12                                                                                     | 0.440     | 1.802 | 1.885 | 1.890                                 | 1.919 | 1.225 | -0.033 | 106            | 106  | 109  | 58   | -100          | 1.12E-5 | 2.32E-5 | 4.82E-5   |
| SW-620                                                                                   | 0.242     | 1.191 | 1.169 | 1.122                                 | 0.969 | 0.284 | 0.044  | 98             | 93   | 77   | 4    | -82           | 2.34E-6 | 1.12E-5 | 4.26E-5   |
| CNS Cancer                                                                               |           |       |       |                                       |       |       |        |                |      |      |      |               |         |         |           |
| SF-268                                                                                   | 0.360     | 1.066 | 1.114 | 1.081                                 | 0.967 | 0.417 | 0.159  | 107            | 102  | 86   | 8    | -56           | 2.90E-6 | 1.34E-5 | 8.10E-5   |
| SF-295                                                                                   | 0.799     | 2.626 | 2.461 | 2.487                                 | 2.568 | 1.758 | 0.294  | 91             | 92   | 97   | 52   | -63           | 1.05E-5 | 2.84E-5 | 7.69E-5   |
| SF-539                                                                                   | 0.654     | 1.593 | 1.544 | 1.657                                 | 1.457 | 0.766 | 0.065  | 95             | 107  | 86   | 12   | -90           | 3.04E-6 | 1.31E-5 | 4.05E-5   |
| SNB-19                                                                                   | 0.484     | 1.472 | 1.401 | 1.403                                 | 1.109 | 0.703 | 0.199  | 93             | 93   | 63   | 22   | -59           | 2.10E-6 | 1.88E-5 | 7.77E-5   |
| SNB-75                                                                                   | 0.760     | 1.428 | 1.317 | 1.238                                 | 1.328 | 1.061 | 0.006  | 83             | 72   | 85   | 45   | -99           | 7.51E-6 | 2.05E-5 | 4.56E-5   |
| U251                                                                                     | 0.337     | 1.189 | 1.166 | 1.192                                 | 1.028 | 0.290 | -0.013 | 97             | 100  | 81   | -14  | -100          | 2.12E-6 | 7.13E-6 | 2.62E-5   |
| Melanoma                                                                                 |           |       |       |                                       |       |       |        |                |      |      |      |               |         |         |           |
| LOX IMVI                                                                                 | 0.268     | 2.081 | 1.980 | 1.945                                 | 1.121 | 0.195 | 0.114  | 94             | 93   | 47   | -27  | -58           | 8.61E-7 | 4.30E-6 | 5.60E-5   |
| MALME-3M                                                                                 | 0.759     | 1.388 | 1.354 | 1.423                                 | 1.437 | 1.038 | 0.223  | 95             | 105  | 108  | 44   | -71           | 8.12E-6 | 2.43E-5 | 6.61E-5   |
| M14                                                                                      | 0.350     | 1.272 | 1.266 | 1.280                                 | 1.210 | 0.517 | 0.059  | 99             | 101  | 93   | 18   | -83           | 3.76E-6 | 1.51E-5 | 4.70E-5   |
| MDA-MB-435                                                                               | 0.538     | 2.009 | 1.932 | 1.914                                 | 1.831 | 0.852 | 0.156  | 95             | 94   | 88   | 21   | -71           | 3.71E-6 | 1.70E-5 | 5.92E-5   |
| SK-MEL-2                                                                                 | 0.749     | 1.343 | 1.351 | 1.386                                 | 1.335 | 0.788 | 0.122  | 101            | 107  | 99   | 7    | -84           | 3.38E-6 | 1.18E-5 | 4.23E-5   |
| SK-MEL-28                                                                                | 0.415     | 1.106 | 1.085 | 1.065                                 | 1.099 | 0.688 | 0.103  | 97             | 94   | 99   | 39   | -75           | 6.65E-6 | 2.21E-5 | 6.02E-5   |
| SK-MEL-5                                                                                 | 0.562     | 1.927 | 1.950 | 1.919                                 | 1.710 | 0.601 | -0.046 | 102            | 99   | 84   | 3    | -100          | 2.63E-6 | 1.07E-5 | 3.26E-5   |
| UACC-257                                                                                 | 0.792     | 1.573 | 1.489 | 1.479                                 | 1.495 | 1.202 | 0.065  | 89             | 88   | 90   | 52   | -92           | 1.04E-5 | 2.31E-5 | 5.13E-5   |
| UACC-62                                                                                  | 0.729     | 2.303 | 2.256 | 2.133                                 | 1.916 | 0.641 | 0.154  | 97             | 89   | 75   | -12  | -79           | 1.95E-6 | 7.27E-6 | 3.69E-5   |
| Ovarian Cancer                                                                           |           |       |       |                                       |       |       |        |                |      |      |      |               |         |         |           |
| IGROV1                                                                                   | 0.429     | 1.626 | 1.720 | 1.645                                 | 1.599 | 0.816 | 0.184  | 108            | 102  | 98   | 32   | -57           | 5.36E-6 | 2.30E-5 | 8.33E-5   |
| OVCAR-3                                                                                  | 0.335     | 0.763 | 0.757 | 0.766                                 | 0.760 | 0.242 | -0.028 | 99             | 101  | 99   | -28  | -100          | 2.44E-6 | 6.03E-6 | 2.02E-5   |
| OVCAR-4                                                                                  | 0.592     | 1.418 | 1.380 | 1.324                                 | 1.261 | 0.762 | 0.053  | 95             | 89   | 81   | 21   | -91           | 3.25E-6 | 1.53E-5 | 4.29E-5   |
| OVCAR-5                                                                                  | 0.463     | 0.951 | 0.947 | 0.967                                 | 0.983 | 0.656 | -0.005 | 99             | 103  | 107  | 40   | -100          | 6.99E-6 | 1.92E-5 | 4.38E-5   |
| OVCAR-8                                                                                  | 0.399     | 1.383 | 1.365 | 1.291                                 | 0.982 | 0.293 | 0.079  | 98             | 91   | 59   | -27  | -80           | 1.28E-6 | 4.90E-6 | 2.73E-5   |
| NCI/ADR-RES                                                                              | 0.525     | 1.857 | 1.869 | 1.800                                 | 1.688 | 0.799 | 0.268  | 101            | 96   | 87   | 21   | -49           | 3.62E-6 | 1.97E-5 | > 1.00E-4 |
| SK-OV-3                                                                                  | 0.714     | 1.710 | 1.695 | 1.735                                 | 1.781 | 1.240 | 0.067  | 99             | 103  | 107  | 53   | -91           | 1.05E-5 | 2.33E-5 | 5.21E-5   |
| Renal Cancer                                                                             |           |       |       |                                       |       |       |        |                |      |      |      |               |         |         |           |
| 786-0                                                                                    | 0.700     | 2.354 | 2.424 | 2.428                                 | 2.362 | 1.507 | 0.235  | 104            | 105  | 100  | 49   | -66           | 9.47E-6 | 2.65E-5 | 7.20E-5   |
| A498                                                                                     | 1.273     | 1.890 | 1.764 | 1.705                                 | 1.628 | 1.035 | 0.049  | 79             | 70   | 57   | -19  | -96           | 1.25E-6 | 5.68E-6 | 2.53E-5   |
| ACHN                                                                                     | 0.366     | 1.345 | 1.388 | 1.374                                 | 1.287 | 0.512 | 0.013  | 104            | 103  | 94   | 15   | -97           | 3.60E-6 | 1.36E-5 | 3.82E-5   |
| CAKI-1                                                                                   | 0.584     | 2.216 | 2.027 | 2.084                                 | 2.003 | 1.479 | 0.213  | 88             | 92   | 87   | 55   | -64           | 1.10E-5 | 2.90E-5 | 7.67E-5   |
| RXF 393                                                                                  | 0.656     | 1.036 | 1.050 | 1.053                                 | 1.010 | 0.582 | 0.073  | 104            | 105  | 93   | -11  | -89           | 2.59E-6 | 7.79E-6 | 3.15E-5   |
| SN12C                                                                                    | 0.524     | 1.760 | 1.658 | 1.652                                 | 1.333 | 0.663 | 0.160  | 92             | 91   | 65   | 11   | -70           | 1.93E-6 | 1.38E-5 | 5.73E-5   |
| TK-10                                                                                    | 0.588     | 1.078 | 1.050 | 1.102                                 | 1.061 | 0.748 | 0.040  | 94             | 105  | 96   | 33   | -93           | 5.35E-6 | 1.82E-5 | 4.53E-5   |
| UO-31                                                                                    | 0.580     | 1.559 | 1.493 | 1.502                                 | 1.381 | 0.867 | 0.185  | 93             | 94   | 82   | 29   | -68           | 4.04E-6 | 2.00E-5 | 6.51E-5   |
| Prostate Cancer                                                                          |           |       |       |                                       |       |       |        |                |      |      |      |               |         |         |           |
| PC-3                                                                                     | 0.561     | 2.009 | 1.970 | 1.907                                 | 1.858 | 1.001 | 0.135  | 97             | 93   | 90   | 30   | -76           | 4.66E-6 | 1.93E-5 | 5.69E-5   |
| DU-145                                                                                   | 0.276     | 0.963 | 1.027 | 1.031                                 | 0.952 | 0.416 | -0.060 | 109            | 110  | 98   | 20   | -100          | 4.17E-6 | 1.48E-5 | 3.84E-5   |
| Breast Cancer                                                                            |           |       |       |                                       |       |       |        |                |      |      |      |               |         |         |           |
| MCF7                                                                                     | 0.402     | 1.696 | 1.553 | 1.414                                 | 1.027 | 0.428 | 0.071  | 89             | 78   | 48   | 2    | -82           | 8.79E-7 | 1.06E-5 | 4.13E-5   |
| MDA-MB-231/ATCC                                                                          | 0.461     | 1.013 | 1.050 | 0.999                                 | 0.917 | 0.682 | 0.144  | 107            | 97   | 83   | 40   | -69           | 5.83E-6 | 2.33E-5 | 6.72E-5   |
| HS 578T                                                                                  | 0.967     | 1.462 | 1.401 | 1.327                                 | 1.185 | 0.909 | 0.433  | 88             | 73   | 44   | -6   | -55           | 6.20E-7 | 7.59E-6 | 7.82E-5   |
| BT-549                                                                                   | 0.632     | 1.356 | 1.318 | 1.320                                 | 1.303 | 0.900 | 0.177  | 95             | 95   | 93   | 37   | -72           | 5.84E-6 | 2.18E-5 | 6.27E-5   |
| T-47D                                                                                    | 0.711     | 1.775 | 1.735 | 1.732                                 | 1.702 | 1.311 | 0.193  | 96             | 96   | 93   | 56   | -73           | 1.12E-5 | 2.73E-5 | 6.66E-5   |
| MDA-MB-468                                                                               | 0.501     | 0.811 | 0.816 | 0.808                                 | 0.791 | 0.406 | 0.014  | 102            | 99   | 94   | -19  | -97           | 2.44E-6 | 6.77E-6 | 2.49E-5   |

5,11-Dimethyl-10*H*-pyrido[3,4-*b*]carbazol-7-ol **7**

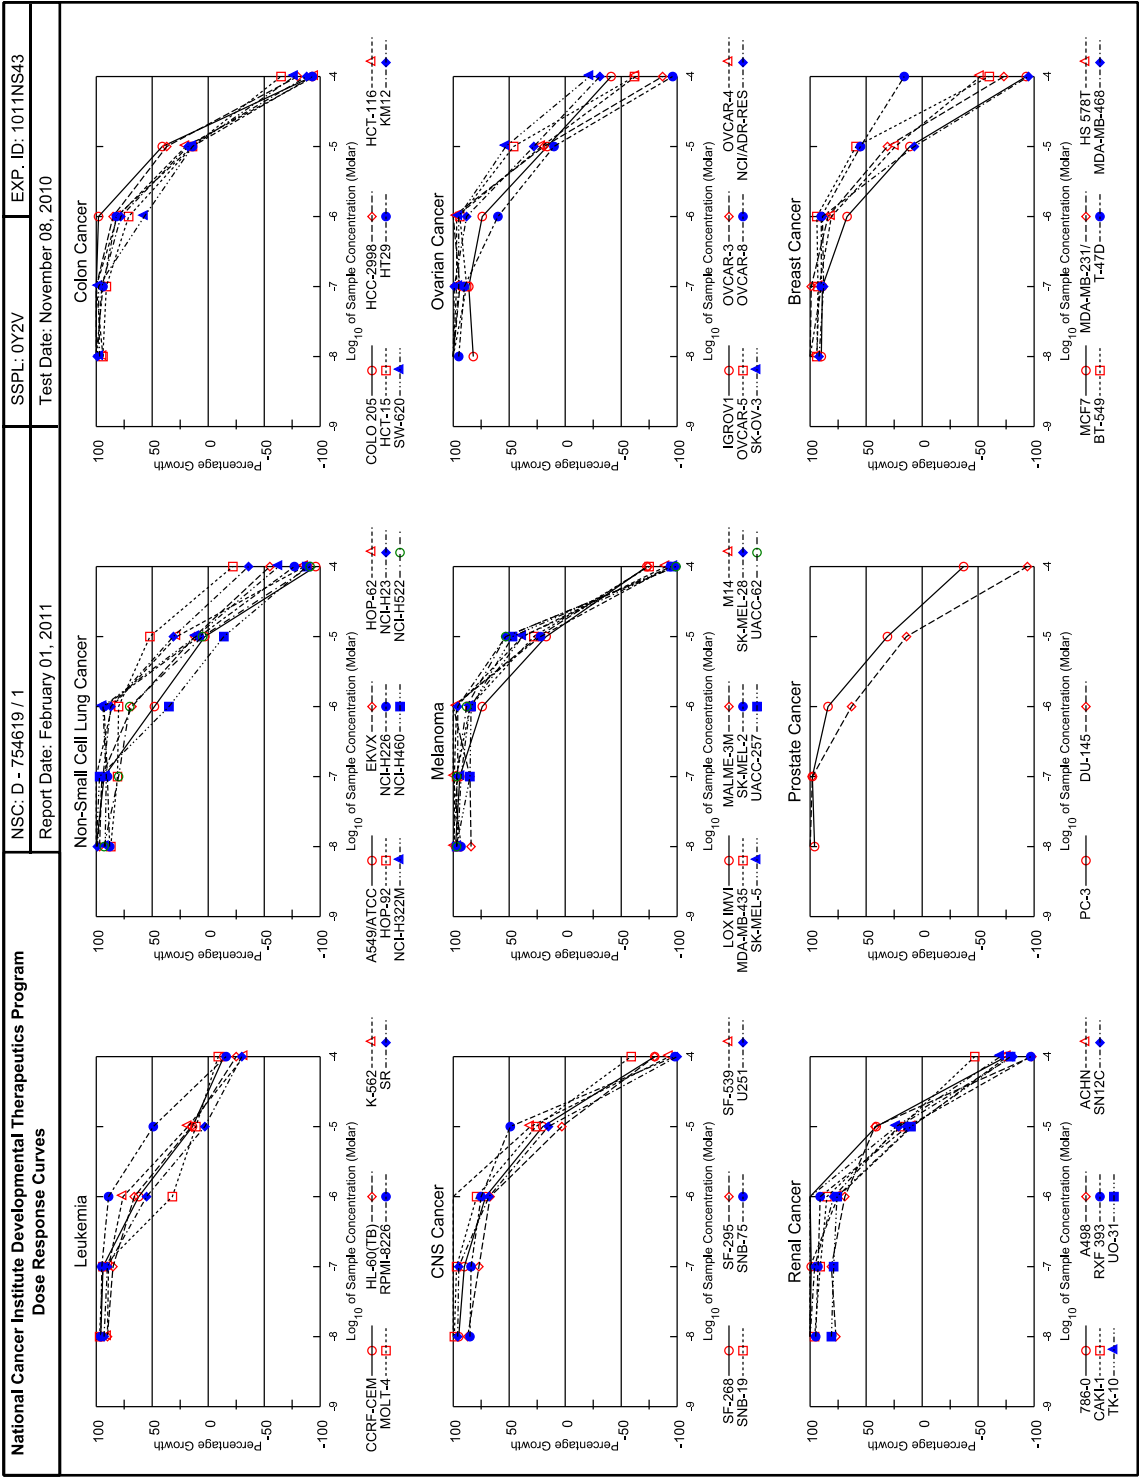

5,11-Dimethyl-10*H*-pyrido[3,4-*b*]carbazol-7-ol 7

| National Cancer Institute Developmental Therapeutics Program<br>In-Vitro Testing Results |           |       |       |                                       |       |       |        |      |      |                |      |      |               |           |           |
|------------------------------------------------------------------------------------------|-----------|-------|-------|---------------------------------------|-------|-------|--------|------|------|----------------|------|------|---------------|-----------|-----------|
| NSC : D - 754619 / 1                                                                     |           |       |       | Experiment ID : 1011NS43              |       |       |        |      |      | Test Type : 08 |      |      | Units : Molar |           |           |
| Report Date : February 01, 2011                                                          |           |       |       | Test Date : November 08, 2010         |       |       |        |      |      | QNS :          |      |      | MC :          |           |           |
| COMI : CM-7-387-1 (98577)                                                                |           |       |       | Stain Reagent : SRB Dual-Pass Related |       |       |        |      |      | SSPL : 0Y2V    |      |      |               |           |           |
| Log10 Concentration                                                                      |           |       |       |                                       |       |       |        |      |      |                |      |      |               |           |           |
| Panel/Cell Line                                                                          | Time Zero | Ctrl  | -8.0  | -7.0                                  | -6.0  | -5.0  | -4.0   | -8.0 | -7.0 | -6.0           | -5.0 | -4.0 | GI50          | TGI       | LC50      |
| Leukemia                                                                                 |           |       |       |                                       |       |       |        |      |      |                |      |      |               |           |           |
| CCRF-CEM                                                                                 | 0.564     | 2.455 | 2.385 | 2.347                                 | 1.737 | 0.820 | 0.483  | 96   | 94   | 62             | 14   | -14  | 1.77E-6       | 3.04E-5   | > 1.00E-4 |
| HL-60(TB)                                                                                | 0.664     | 2.487 | 2.301 | 2.214                                 | 1.874 | 0.947 | 0.495  | 90   | 85   | 66             | 15   | -25  | 2.10E-6       | 2.39E-5   | > 1.00E-4 |
| K-562                                                                                    | 0.166     | 1.187 | 1.087 | 1.074                                 | 0.945 | 0.350 | 0.113  | 90   | 89   | 76             | 18   | -32  | 2.83E-6       | 2.28E-5   | > 1.00E-4 |
| MOLT-4                                                                                   | 0.546     | 2.041 | 2.000 | 1.956                                 | 1.027 | 0.714 | 0.498  | 97   | 94   | 32             | 11   | -9   | 5.17E-7       | 3.62E-5   | > 1.00E-4 |
| RPMI-8226                                                                                | 1.152     | 2.976 | 2.896 | 2.888                                 | 2.771 | 2.037 | 0.966  | 96   | 95   | 89             | 49   | -16  | 9.19E-6       | 5.63E-5   | > 1.00E-4 |
| SR                                                                                       | 0.382     | 1.808 | 1.714 | 1.667                                 | 1.170 | 0.423 | 0.266  | 93   | 90   | 55             | 3    | -30  | 1.26E-6       | 1.22E-5   | > 1.00E-4 |
| Non-Small Cell Lung Cancer                                                               |           |       |       |                                       |       |       |        |      |      |                |      |      |               |           |           |
| A549/ATCC                                                                                | 0.317     | 1.370 | 1.407 | 1.299                                 | 0.819 | 0.349 | 0.013  | 104  | 93   | 48             | 3    | -96  | 8.88E-7       | 1.07E-5   | 3.43E-5   |
| EKVX                                                                                     | 0.655     | 1.496 | 1.474 | 1.451                                 | 1.228 | 0.755 | 0.292  | 97   | 95   | 68             | 12   | -55  | 2.10E-6       | 1.50E-5   | 8.29E-5   |
| HOP-62                                                                                   | 0.492     | 1.439 | 1.453 | 1.493                                 | 1.303 | 0.758 | 0.070  | 101  | 106  | 86             | 28   | -86  | 4.15E-6       | 1.76E-5   | 4.85E-5   |
| HOP-92                                                                                   | 0.992     | 1.436 | 1.379 | 1.350                                 | 1.349 | 1.225 | 0.771  | 87   | 81   | 80             | 52   | -22  | 1.08E-5       | 5.03E-5   | > 1.00E-4 |
| NCI-H226                                                                                 | 0.666     | 1.373 | 1.286 | 1.305                                 | 1.323 | 0.723 | 0.154  | 88   | 90   | 93             | 8    | -77  | 3.20E-6       | 1.24E-5   | 4.82E-5   |
| NCI-H23                                                                                  | 0.636     | 1.877 | 1.868 | 1.798                                 | 1.714 | 1.020 | 0.407  | 99   | 94   | 87             | 31   | -36  | 4.57E-6       | 2.90E-5   | > 1.00E-4 |
| NCI-H322M                                                                                | 0.668     | 1.399 | 1.339 | 1.334                                 | 1.357 | 0.750 | 0.245  | 92   | 91   | 94             | 11   | -63  | 3.41E-6       | 1.41E-5   | 6.61E-5   |
| NCI-H460                                                                                 | 0.257     | 1.970 | 2.010 | 1.920                                 | 0.852 | 0.220 | 0.032  | 102  | 97   | 35             | -14  | -88  | 5.69E-7       | 5.09E-6   | 3.06E-5   |
| NCI-H522                                                                                 | 0.577     | 1.238 | 1.189 | 1.103                                 | 1.041 | 0.610 | 0.053  | 93   | 80   | 70             | 5    | -91  | 2.04E-6       | 1.13E-5   | 3.75E-5   |
| Colon Cancer                                                                             |           |       |       |                                       |       |       |        |      |      |                |      |      |               |           |           |
| COLO 205                                                                                 | 0.282     | 1.066 | 1.085 | 1.074                                 | 1.050 | 0.606 | 0.021  | 102  | 101  | 98             | 41   | -93  | 7.03E-6       | 2.03E-5   | 4.80E-5   |
| HCC-2998                                                                                 | 0.511     | 1.999 | 2.086 | 2.052                                 | 1.769 | 1.056 | 0.102  | 106  | 104  | 85             | 37   | -80  | 5.25E-6       | 2.06E-5   | 5.53E-5   |
| HCT-116                                                                                  | 0.244     | 1.814 | 1.725 | 1.843                                 | 1.518 | 0.565 | 0.012  | 94   | 102  | 81             | 20   | -95  | 3.26E-6       | 1.50E-5   | 4.06E-5   |
| HCT-15                                                                                   | 0.247     | 1.432 | 1.363 | 1.325                                 | 1.093 | 0.411 | 0.088  | 94   | 91   | 71             | 14   | -65  | 2.35E-6       | 1.50E-5   | 6.52E-5   |
| HT29                                                                                     | 0.205     | 1.031 | 1.049 | 0.980                                 | 0.883 | 0.317 | 0.015  | 102  | 94   | 82             | 14   | -93  | 2.93E-6       | 1.34E-5   | 3.95E-5   |
| KM12                                                                                     | 0.440     | 1.866 | 1.859 | 1.788                                 | 1.558 | 0.695 | 0.053  | 99   | 95   | 78             | 18   | -88  | 2.94E-6       | 1.47E-5   | 4.37E-5   |
| SW-620                                                                                   | 0.242     | 1.187 | 1.155 | 1.169                                 | 0.779 | 0.372 | 0.055  | 97   | 98   | 57             | 14   | -77  | 1.44E-6       | 1.42E-5   | 5.02E-5   |
| CNS Cancer                                                                               |           |       |       |                                       |       |       |        |      |      |                |      |      |               |           |           |
| SF-268                                                                                   | 0.360     | 1.154 | 1.112 | 1.074                                 | 0.926 | 0.520 | 0.074  | 95   | 90   | 71             | 20   | -80  | 2.60E-6       | 1.59E-5   | 5.05E-5   |
| SF-295                                                                                   | 0.799     | 2.465 | 2.254 | 2.084                                 | 1.909 | 0.841 | 0.163  | 87   | 77   | 67             | 3    | -80  | 1.82E-6       | 1.07E-5   | 4.36E-5   |
| SF-539                                                                                   | 0.654     | 1.576 | 1.586 | 1.605                                 | 1.588 | 0.942 | 0.049  | 101  | 103  | 101            | 31   | -93  | 5.39E-6       | 1.79E-5   | 4.53E-5   |
| SNB-19                                                                                   | 0.484     | 1.460 | 1.451 | 1.431                                 | 1.252 | 0.735 | 0.199  | 99   | 97   | 79             | 26   | -59  | 3.47E-6       | 2.01E-5   | 7.85E-5   |
| SNB-75                                                                                   | 0.760     | 1.429 | 1.328 | 1.320                                 | 1.263 | 1.089 | 0.015  | 85   | 84   | 75             | 49   | -98  | 9.33E-6       | 2.16E-5   | 4.72E-5   |
| U251                                                                                     | 0.337     | 1.185 | 1.153 | 1.142                                 | 0.916 | 0.465 | -0.018 | 96   | 95   | 68             | 15   | -100 | 2.20E-6       | 1.35E-5   | 3.68E-5   |
| Melanoma                                                                                 |           |       |       |                                       |       |       |        |      |      |                |      |      |               |           |           |
| LOX IMVI                                                                                 | 0.268     | 1.931 | 1.892 | 1.827                                 | 1.507 | 0.559 | 0.072  | 98   | 94   | 74             | 17   | -73  | 2.69E-6       | 1.56E-5   | 5.55E-5   |
| MALME-3M                                                                                 | 0.759     | 1.429 | 1.323 | 1.327                                 | 1.434 | 0.922 | 0.201  | 84   | 85   | 101            | 24   | -74  | 4.61E-6       | 1.77E-5   | 5.75E-5   |
| M14                                                                                      | 0.350     | 1.281 | 1.270 | 1.276                                 | 1.258 | 0.701 | 0.037  | 99   | 99   | 97             | 38   | -90  | 6.21E-6       | 1.98E-5   | 4.89E-5   |
| MDA-MB-435                                                                               | 0.538     | 1.940 | 1.882 | 1.901                                 | 1.728 | 0.934 | 0.137  | 96   | 97   | 85             | 28   | -75  | 4.13E-6       | 1.88E-5   | 5.77E-5   |
| SK-MEL-2                                                                                 | 0.749     | 1.342 | 1.302 | 1.339                                 | 1.365 | 0.877 | 0.044  | 93   | 100  | 104            | 22   | -94  | 4.51E-6       | 1.53E-5   | 4.15E-5   |
| SK-MEL-28                                                                                | 0.415     | 1.105 | 1.142 | 1.078                                 | 1.075 | 0.784 | 0.004  | 105  | 96   | 96             | 53   | -99  | 1.05E-5       | 2.24E-5   | 4.77E-5   |
| SK-MEL-5                                                                                 | 0.562     | 1.994 | 1.934 | 1.890                                 | 1.773 | 1.105 | 0.016  | 96   | 93   | 85             | 38   | -97  | 5.51E-6       | 1.91E-5   | 4.48E-5   |
| UACC-257                                                                                 | 0.792     | 1.538 | 1.519 | 1.425                                 | 1.417 | 1.142 | 0.044  | 97   | 85   | 84             | 47   | -95  | 8.23E-6       | 2.15E-5   | 4.84E-5   |
| UACC-62                                                                                  | 0.729     | 2.360 | 2.307 | 2.313                                 | 2.158 | 1.600 | 0.006  | 97   | 97   | 88             | 53   | -99  | 1.05E-5       | 2.24E-5   | 4.76E-5   |
| Ovarian Cancer                                                                           |           |       |       |                                       |       |       |        |      |      |                |      |      |               |           |           |
| IGROV1                                                                                   | 0.429     | 1.456 | 1.276 | 1.315                                 | 1.192 | 0.596 | 0.255  | 82   | 86   | 74             | 16   | -41  | 2.62E-6       | 1.93E-5   | > 1.00E-4 |
| OVCAR-3                                                                                  | 0.335     | 0.786 | 0.786 | 0.758                                 | 0.804 | 0.421 | 0.045  | 100  | 94   | 104            | 19   | -87  | 4.33E-6       | 1.51E-5   | 4.50E-5   |
| OVCAR-4                                                                                  | 0.592     | 1.394 | 1.416 | 1.366                                 | 1.372 | 0.760 | 0.221  | 103  | 97   | 97             | 21   | -63  | 4.16E-6       | 1.78E-5   | 7.05E-5   |
| OVCAR-5                                                                                  | 0.463     | 0.984 | 1.004 | 0.921                                 | 0.952 | 0.701 | 0.176  | 104  | 88   | 94             | 46   | -62  | 8.12E-6       | 2.66E-5   | 7.74E-5   |
| OVCAR-8                                                                                  | 0.399     | 1.443 | 1.387 | 1.337                                 | 1.022 | 0.503 | 0.017  | 95   | 90   | 60             | 10   | -96  | 1.57E-6       | 1.24E-5   | 3.69E-5   |
| NCI/ADR-RES                                                                              | 0.525     | 1.755 | 1.793 | 1.746                                 | 1.610 | 0.875 | 0.362  | 103  | 99   | 88             | 28   | -31  | 4.36E-6       | 3.01E-5   | > 1.00E-4 |
| SK-OV-3                                                                                  | 0.714     | 1.666 | 1.705 | 1.619                                 | 1.615 | 1.217 | 0.558  | 104  | 95   | 95             | 53   | -22  | 1.09E-5       | 5.10E-5   | > 1.00E-4 |
| Renal Cancer                                                                             |           |       |       |                                       |       |       |        |      |      |                |      |      |               |           |           |
| 786-0                                                                                    | 0.700     | 2.306 | 2.321 | 2.290                                 | 2.357 | 1.354 | 0.175  | 101  | 99   | 103            | 41   | -75  | 7.10E-6       | 2.25E-5   | 6.07E-5   |
| A498                                                                                     | 1.273     | 2.081 | 1.896 | 1.925                                 | 1.831 | 1.609 | 0.029  | 77   | 81   | 69             | 42   | -98  | 4.95E-6       | 1.99E-5   | 4.54E-5   |
| ACHN                                                                                     | 0.366     | 1.337 | 1.370 | 1.341                                 | 1.093 | 0.457 | 0.088  | 103  | 100  | 75             | 9    | -76  | 2.40E-6       | 1.29E-5   | 4.95E-5   |
| CAKI-1                                                                                   | 0.584     | 2.057 | 2.001 | 1.929                                 | 1.842 | 0.866 | 0.307  | 96   | 91   | 85             | 19   | -47  | 3.42E-6       | 1.94E-5   | > 1.00E-4 |
| RXF 393                                                                                  | 0.656     | 1.053 | 1.034 | 1.025                                 | 1.018 | 0.707 | 0.023  | 95   | 93   | 91             | 13   | -97  | 3.34E-6       | 1.31E-5   | 3.75E-5   |
| SN12C                                                                                    | 0.524     | 1.730 | 1.771 | 1.676                                 | 1.478 | 0.774 | 0.101  | 103  | 96   | 79             | 21   | -81  | 3.15E-6       | 1.60E-5   | 4.98E-5   |
| TK-10                                                                                    | 0.588     | 1.007 | 1.006 | 1.015                                 | 1.031 | 0.686 | 0.178  | 100  | 102  | 106            | 23   | -70  | 4.75E-6       | 1.78E-5   | 6.13E-5   |
| UO-31                                                                                    | 0.580     | 1.457 | 1.292 | 1.276                                 | 1.249 | 0.670 | 0.122  | 81   | 79   | 76             | 10   | -79  | 2.50E-6       | 1.30E-5   | 4.73E-5   |
| Prostate Cancer                                                                          |           |       |       |                                       |       |       |        |      |      |                |      |      |               |           |           |
| PC-3                                                                                     | 0.561     | 1.970 | 1.920 | 1.937                                 | 1.738 | 0.993 | 0.356  | 96   | 98   | 84             | 31   | -37  | 4.31E-6       | 2.86E-5   | > 1.00E-4 |
| DU-145                                                                                   | 0.276     | 1.034 | 1.036 | 1.020                                 | 0.753 | 0.381 | 0.018  | 100  | 98   | 63             | 14   | -94  | 1.83E-6       | 1.34E-5   | 3.92E-5   |
| Breast Cancer                                                                            |           |       |       |                                       |       |       |        |      |      |                |      |      |               |           |           |
| MCF7                                                                                     | 0.402     | 1.756 | 1.627 | 1.601                                 | 1.305 | 0.548 | 0.029  | 90   | 89   | 67             | 11   | -93  | 1.99E-6       | 1.27E-5   | 3.86E-5   |
| MDA-MB-231/ATCC                                                                          | 0.461     | 1.004 | 1.051 | 1.000                                 | 0.918 | 0.627 | 0.126  | 109  | 99   | 84             | 31   | -73  | 4.34E-6       | 1.97E-5   | 6.02E-5   |
| HS 578T                                                                                  | 0.967     | 1.647 | 1.605 | 1.595                                 | 1.518 | 1.131 | 0.469  | 94   | 92   | 81             | 24   | -52  | 3.50E-6       | 2.08E-5   | 9.54E-5   |
| BT-549                                                                                   | 0.632     | 1.338 | 1.297 | 1.289                                 | 1.295 | 1.048 | 0.250  | 94   | 93   | 94             | 59   | -60  | 1.19E-5       | 3.12E-5   | 8.18E-5   |
| T-47D                                                                                    | 0.711     | 1.678 | 1.710 | 1.579                                 | 1.577 | 1.246 | 0.870  | 103  | 90   | 90             | 55   | 16   | 1.37E-5       | > 1.00E-4 | > 1.00E-4 |
| MDA-MB-468                                                                               | 0.501     | 0.838 | 0.812 | 0.799                                 | 0.802 | 0.525 | 0.026  | 92   | 88   | 89             | 7    | -95  | 3.01E-6       | 1.17E-5   | 3.63E-5   |

2-Methylisoellipticinium iodide **16**

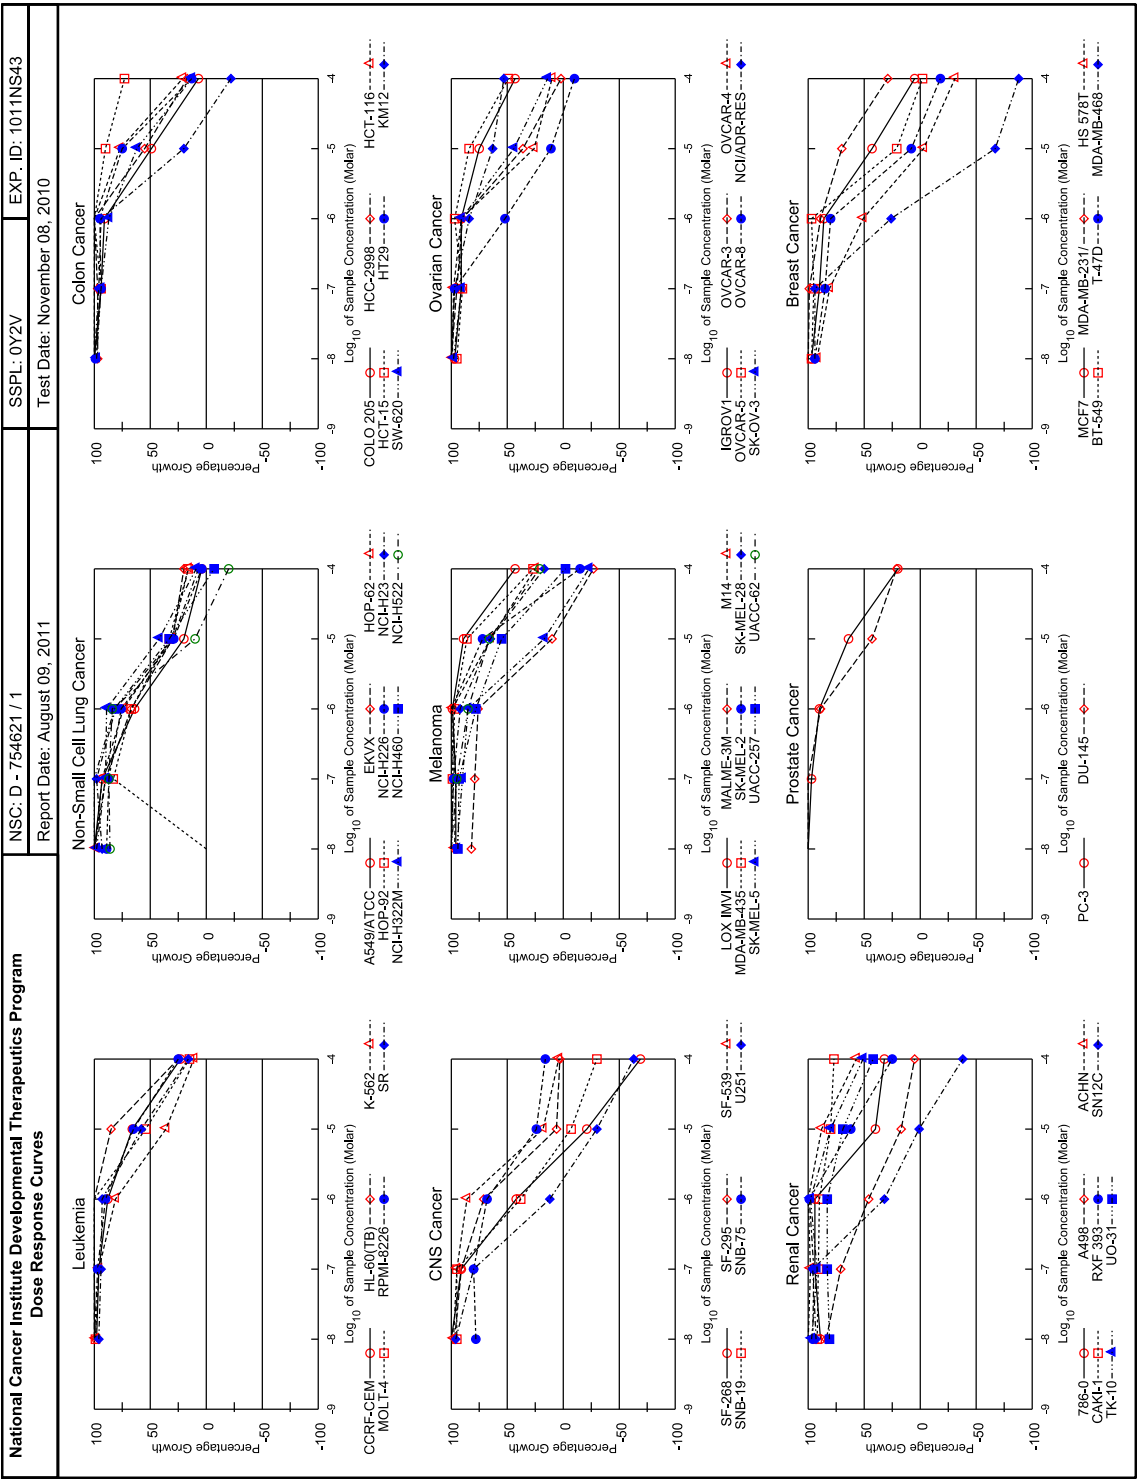

Methylisoellpticinium iodide **16**

| National Cancer Institute Developmental Therapeutics Program<br>In-Vitro Testing Results |       |       |                        |                                       |       |       |       |      |                |                |      |      |               |           |           |      |
|------------------------------------------------------------------------------------------|-------|-------|------------------------|---------------------------------------|-------|-------|-------|------|----------------|----------------|------|------|---------------|-----------|-----------|------|
| NSC : D - 754621 / 1                                                                     |       |       |                        | Experiment ID : 1011NS43              |       |       |       |      |                | Test Type : 08 |      |      | Units : Molar |           |           |      |
| Report Date : August 09, 2011                                                            |       |       |                        | Test Date : November 08, 2010         |       |       |       |      |                | QNS :          |      |      | MC :          |           |           |      |
| COMI : CM-4-223-1 (98579)                                                                |       |       |                        | Stain Reagent : SRB Dual-Pass Related |       |       |       |      |                | SSPL : 0Y2V    |      |      |               |           |           |      |
| Log10 Concentration                                                                      |       |       |                        |                                       |       |       |       |      |                |                |      |      |               |           |           |      |
| Panel/Cell Line                                                                          | Time  |       | Mean Optical Densities |                                       |       |       |       |      | Percent Growth |                |      |      |               | GI50      | TGI       | LC50 |
|                                                                                          | Zero  | Ctrl  | -8.0                   | -7.0                                  | -6.0  | -5.0  | -4.0  | -8.0 | -7.0           | -6.0           | -5.0 | -4.0 |               |           |           |      |
| Leukemia                                                                                 |       |       |                        |                                       |       |       |       |      |                |                |      |      |               |           |           |      |
| CCRF-CEM                                                                                 | 0.564 | 2.509 | 2.461                  | 2.437                                 | 2.285 | 1.849 | 1.009 | 98   | 96             | 88             | 66   | 23   | 2.35E-5       | > 1.00E-4 | > 1.00E-4 |      |
| HL-60(TB)                                                                                | 0.664 | 2.158 | 2.173                  | 2.243                                 | 2.351 | 1.931 | 1.036 | 101  | 106            | 113            | 85   | 25   | 3.81E-5       | > 1.00E-4 | > 1.00E-4 |      |
| K-562                                                                                    | 0.166 | 1.170 | 1.157                  | 1.133                                 | 0.977 | 0.527 | 0.276 | 99   | 96             | 81             | 36   | 11   | 4.87E-6       | > 1.00E-4 | > 1.00E-4 |      |
| MOLT-4                                                                                   | 0.546 | 2.028 | 2.010                  | 2.027                                 | 2.040 | 1.346 | 0.764 | 99   | 100            | 101            | 54   | 15   | 1.26E-5       | > 1.00E-4 | > 1.00E-4 |      |
| RPMI-8226                                                                                | 1.152 | 2.925 | 2.931                  | 2.869                                 | 2.751 | 2.307 | 1.590 | 100  | 97             | 90             | 65   | 25   | 2.37E-5       | > 1.00E-4 | > 1.00E-4 |      |
| SR                                                                                       | 0.382 | 1.828 | 1.766                  | 1.747                                 | 1.724 | 1.228 | 0.609 | 96   | 94             | 93             | 58   | 16   | 1.58E-5       | > 1.00E-4 | > 1.00E-4 |      |
| Non-Small Cell Lung Cancer                                                               |       |       |                        |                                       |       |       |       |      |                |                |      |      |               |           |           |      |
| A549/ATCC                                                                                | 0.317 | 1.410 | 1.420                  | 1.332                                 | 1.022 | 0.532 | 0.361 | 101  | 93             | 64             | 20   | 4    | 2.10E-6       | > 1.00E-4 | > 1.00E-4 |      |
| EKVX                                                                                     | 0.655 | 1.692 | 1.700                  | 1.591                                 | 1.347 | 0.963 | 0.866 | 101  | 90             | 67             | 30   | 20   | 2.83E-6       | > 1.00E-4 | > 1.00E-4 |      |
| HOP-62                                                                                   | 0.492 | 1.804 | 1.792                  | 1.713                                 | 1.468 | 0.903 | 0.704 | 99   | 93             | 74             | 31   | 16   | 3.68E-6       | > 1.00E-4 | > 1.00E-4 |      |
| HOP-92                                                                                   | 0.992 | 1.431 |                        | 1.358                                 | 1.284 | 1.139 | 1.062 |      | 83             | 67             | 33   | 16   | 3.16E-6       | > 1.00E-4 | > 1.00E-4 |      |
| NCI-H226                                                                                 | 0.666 | 1.436 | 1.354                  | 1.337                                 | 1.254 | 0.888 | 0.696 | 89   | 87             | 76             | 29   | 4    | 3.58E-6       | > 1.00E-4 | > 1.00E-4 |      |
| NCI-H23                                                                                  | 0.636 | 1.892 | 1.809                  | 1.865                                 | 1.659 | 1.011 | 0.730 | 93   | 98             | 81             | 30   | 7    | 4.07E-6       | > 1.00E-4 | > 1.00E-4 |      |
| NCI-H322M                                                                                | 0.668 | 1.470 | 1.451                  | 1.393                                 | 1.384 | 1.002 | 0.739 | 98   | 90             | 89             | 42   | 9    | 6.68E-6       | > 1.00E-4 | > 1.00E-4 |      |
| NCI-H460                                                                                 | 0.257 | 2.065 | 2.113                  | 2.056                                 | 1.731 | 0.857 | 0.240 | 103  | 100            | 82             | 33   | -7   | 4.49E-6       | 6.82E-5   | > 1.00E-4 |      |
| NCI-H522                                                                                 | 0.577 | 1.262 | 1.169                  | 1.174                                 | 1.154 | 0.648 | 0.460 | 86   | 87             | 84             | 10   | -20  | 2.91E-6       | 2.18E-5   | > 1.00E-4 |      |
| Colon Cancer                                                                             |       |       |                        |                                       |       |       |       |      |                |                |      |      |               |           |           |      |
| COLO 205                                                                                 | 0.282 | 1.164 | 1.184                  | 1.113                                 | 1.082 | 0.712 | 0.348 | 102  | 94             | 91             | 49   | 7    | 9.32E-6       | > 1.00E-4 | > 1.00E-4 |      |
| HCC-2998                                                                                 | 0.511 | 2.129 | 2.084                  | 2.073                                 | 2.138 | 1.409 | 0.793 | 97   | 97             | 101            | 55   | 17   | 1.39E-5       | > 1.00E-4 | > 1.00E-4 |      |
| HCT-116                                                                                  | 0.244 | 1.937 | 1.948                  | 1.970                                 | 1.950 | 1.540 | 0.592 | 101  | 102            | 101            | 77   | 21   | 2.98E-5       | > 1.00E-4 | > 1.00E-4 |      |
| HCT-15                                                                                   | 0.247 | 1.561 | 1.558                  | 1.482                                 | 1.573 | 1.430 | 1.205 | 100  | 94             | 101            | 90   | 73   | > 1.00E-4     | > 1.00E-4 | > 1.00E-4 |      |
| HT29                                                                                     | 0.205 | 1.040 | 1.033                  | 0.994                                 | 0.997 | 0.832 | 0.311 | 99   | 94             | 95             | 75   | 13   | 2.52E-5       | > 1.00E-4 | > 1.00E-4 |      |
| KM12                                                                                     | 0.440 | 1.945 | 1.943                  | 1.881                                 | 1.856 | 0.749 | 0.343 | 100  | 96             | 94             | 20   | -22  | 3.97E-6       | 3.03E-5   | > 1.00E-4 |      |
| SW-620                                                                                   | 0.242 | 1.316 | 1.295                  | 1.254                                 | 1.180 | 0.905 | 0.382 | 98   | 94             | 87             | 62   | 13   | 1.74E-5       | > 1.00E-4 | > 1.00E-4 |      |
| CNS Cancer                                                                               |       |       |                        |                                       |       |       |       |      |                |                |      |      |               |           |           |      |
| SF-268                                                                                   | 0.360 | 1.180 | 1.179                  | 1.106                                 | 0.701 | 0.284 | 0.112 | 100  | 91             | 42             | -21  | -69  | 6.76E-7       | 4.61E-6   | 4.02E-5   |      |
| SF-295                                                                                   | 0.799 | 2.734 | 2.684                  | 2.556                                 | 2.175 | 0.920 | 0.864 | 97   | 91             | 71             | 6    | 3    | 2.11E-6       | > 1.00E-4 | > 1.00E-4 |      |
| SF-539                                                                                   | 0.654 | 1.781 | 1.754                  | 1.720                                 | 1.621 | 0.856 | 0.699 | 98   | 95             | 86             | 18   | 4    | 3.37E-6       | > 1.00E-4 | > 1.00E-4 |      |
| SNB-19                                                                                   | 0.484 | 1.599 | 1.541                  | 1.539                                 | 0.904 | 0.453 | 0.340 | 95   | 95             | 38             | -7   | -30  | 6.07E-7       | 7.12E-6   | > 1.00E-4 |      |
| SNB-75                                                                                   | 0.760 | 1.461 | 1.307                  | 1.319                                 | 1.237 | 0.929 | 0.869 | 78   | 80             | 68             | 24   | 16   | 2.58E-6       | > 1.00E-4 | > 1.00E-4 |      |
| U251                                                                                     | 0.337 | 1.281 | 1.242                  | 1.093                                 | 0.449 | 0.237 | 0.124 | 96   | 80             | 12             | -30  | -63  | 2.76E-7       | 1.93E-6   | 4.02E-5   |      |
| Melanoma                                                                                 |       |       |                        |                                       |       |       |       |      |                |                |      |      |               |           |           |      |
| LOX IMVI                                                                                 | 0.268 | 2.004 | 1.943                  | 1.932                                 | 1.992 | 1.808 | 1.007 | 96   | 96             | 99             | 89   | 43   | 6.89E-5       | > 1.00E-4 | > 1.00E-4 |      |
| MALME-3M                                                                                 | 0.759 | 1.452 | 1.330                  | 1.309                                 | 1.287 | 0.828 | 0.552 | 82   | 79             | 76             | 10   | -27  | 2.49E-6       | 1.85E-5   | > 1.00E-4 |      |
| M14                                                                                      | 0.350 | 1.357 | 1.325                  | 1.317                                 | 1.347 | 1.007 | 0.602 | 97   | 96             | 99             | 65   | 25   | 2.39E-5       | > 1.00E-4 | > 1.00E-4 |      |
| MDA-MB-435                                                                               | 0.538 | 1.942 | 1.948                  | 1.927                                 | 1.899 | 1.747 | 0.915 | 100  | 99             | 97             | 86   | 27   | 4.06E-5       | > 1.00E-4 | > 1.00E-4 |      |
| SK-MEL-2                                                                                 | 0.749 | 1.411 | 1.417                  | 1.397                                 | 1.422 | 1.227 | 0.639 | 101  | 98             | 102            | 72   | -15  | 1.80E-5       | 6.76E-5   | > 1.00E-4 |      |
| SK-MEL-28                                                                                | 0.415 | 1.139 | 1.163                  | 1.123                                 | 1.081 | 0.889 | 0.537 | 103  | 98             | 92             | 65   | 17   | 2.08E-5       | > 1.00E-4 | > 1.00E-4 |      |
| SK-MEL-5                                                                                 | 0.562 | 2.031 | 1.960                  | 1.885                                 | 1.811 | 0.805 | 0.431 | 95   | 90             | 85             | 17   | -23  | 3.24E-6       | 2.60E-5   | > 1.00E-4 |      |
| UACC-257                                                                                 | 0.792 | 1.517 | 1.471                  | 1.469                                 | 1.356 | 1.191 | 0.774 | 94   | 93             | 78             | 55   | -2   | 1.22E-5       | 9.11E-5   | > 1.00E-4 |      |
| UACC-62                                                                                  | 0.729 | 2.494 | 2.525                  | 2.406                                 | 2.225 | 1.894 | 1.101 | 102  | 95             | 85             | 66   | 21   | 2.27E-5       | > 1.00E-4 | > 1.00E-4 |      |
| Ovarian Cancer                                                                           |       |       |                        |                                       |       |       |       |      |                |                |      |      |               |           |           |      |
| IGROV1                                                                                   | 0.429 | 1.621 | 1.590                  | 1.514                                 | 1.518 | 1.327 | 0.940 | 97   | 91             | 91             | 75   | 43   | 6.02E-5       | > 1.00E-4 | > 1.00E-4 |      |
| OVCAR-3                                                                                  | 0.335 | 0.882 | 0.902                  | 0.858                                 | 0.830 | 0.531 | 0.348 | 104  | 95             | 90             | 36   | 2    | 5.48E-6       | > 1.00E-4 | > 1.00E-4 |      |
| OVCAR-4                                                                                  | 0.592 | 1.402 | 1.390                  | 1.389                                 | 1.328 | 0.802 | 0.671 | 99   | 98             | 91             | 26   | 10   | 4.25E-6       | > 1.00E-4 | > 1.00E-4 |      |
| OVCAR-5                                                                                  | 0.463 | 1.038 | 1.011                  | 0.983                                 | 1.023 | 0.947 | 0.742 | 95   | 90             | 97             | 84   | 49   | 9.07E-5       | > 1.00E-4 | > 1.00E-4 |      |
| OVCAR-8                                                                                  | 0.399 | 1.407 | 1.483                  | 1.382                                 | 0.924 | 0.509 | 0.361 | 108  | 97             | 52             | 11   | -10  | 1.12E-6       | 3.39E-5   | > 1.00E-4 |      |
| NCI/ADR-RES                                                                              | 0.525 | 1.769 | 1.799                  | 1.736                                 | 1.574 | 1.315 | 1.185 | 102  | 97             | 84             | 63   | 53   | > 1.00E-4     | > 1.00E-4 | > 1.00E-4 |      |
| SK-OV-3                                                                                  | 0.714 | 1.709 | 1.685                  | 1.622                                 | 1.615 | 1.149 | 0.849 | 98   | 91             | 91             | 44   | 14   | 7.32E-6       | > 1.00E-4 | > 1.00E-4 |      |
| Renal Cancer                                                                             |       |       |                        |                                       |       |       |       |      |                |                |      |      |               |           |           |      |
| 786-0                                                                                    | 0.700 | 2.362 | 2.181                  | 2.270                                 | 2.263 | 1.368 | 1.234 | 89   | 94             | 94             | 40   | 32   | 6.57E-6       | > 1.00E-4 | > 1.00E-4 |      |
| A498                                                                                     | 1.273 | 1.924 | 1.822                  | 1.738                                 | 1.571 | 1.387 | 1.304 | 84   | 71             | 46             | 17   | 5    | 6.83E-7       | > 1.00E-4 | > 1.00E-4 |      |
| ACHN                                                                                     | 0.366 | 1.437 | 1.467                  | 1.419                                 | 1.468 | 1.304 | 0.977 | 103  | 98             | 103            | 88   | 57   | > 1.00E-4     | > 1.00E-4 | > 1.00E-4 |      |
| CAKI-1                                                                                   | 0.584 | 2.095 | 1.978                  | 1.953                                 | 1.939 | 1.789 | 1.742 | 92   | 91             | 90             | 80   | 77   | > 1.00E-4     | > 1.00E-4 | > 1.00E-4 |      |
| RXF 393                                                                                  | 0.656 | 1.076 | 1.060                  | 1.056                                 | 1.073 | 0.915 | 0.762 | 96   | 95             | 99             | 62   | 25   | 2.09E-5       | > 1.00E-4 | > 1.00E-4 |      |
| SN12C                                                                                    | 0.524 | 1.857 | 1.763                  | 1.798                                 | 0.956 | 0.532 | 0.327 | 93   | 96             | 32             | 1    | -38  | 5.26E-7       | 1.03E-5   | > 1.00E-4 |      |
| TK-10                                                                                    | 0.588 | 1.085 | 1.071                  | 1.045                                 | 1.075 | 0.985 | 0.844 | 97   | 92             | 98             | 80   | 51   | > 1.00E-4     | > 1.00E-4 | > 1.00E-4 |      |
| UO-31                                                                                    | 0.580 | 1.623 | 1.430                  | 1.446                                 | 1.444 | 1.299 | 1.019 | 81   | 83             | 83             | 69   | 42   | 5.07E-5       | > 1.00E-4 | > 1.00E-4 |      |
| Prostate Cancer                                                                          |       |       |                        |                                       |       |       |       |      |                |                |      |      |               |           |           |      |
| PC-3                                                                                     | 0.561 | 2.032 | 2.033                  | 1.986                                 | 1.892 | 1.503 | 0.859 | 100  | 97             | 90             | 64   | 20   | 2.09E-5       | > 1.00E-4 | > 1.00E-4 |      |
| DU-145                                                                                   | 0.276 | 1.022 | 1.049                  | 1.069                                 | 0.943 | 0.598 | 0.433 | 104  | 106            | 89             | 43   | 21   | 7.09E-6       | > 1.00E-4 | > 1.00E-4 |      |
| Breast Cancer                                                                            |       |       |                        |                                       |       |       |       |      |                |                |      |      |               |           |           |      |
| MCF7                                                                                     | 0.402 | 1.730 | 1.689                  | 1.602                                 | 1.547 | 0.971 | 0.470 | 97   | 90             | 86             | 43   | 5    | 6.84E-6       | > 1.00E-4 | > 1.00E-4 |      |
| MDA-MB-231/ATCC                                                                          | 0.461 | 1.119 | 1.153                  | 1.112                                 | 1.048 | 0.924 | 0.651 | 105  | 99             | 89             | 70   | 29   | 3.09E-5       | > 1.00E-4 | > 1.00E-4 |      |
| HS 578T                                                                                  | 0.967 | 1.628 | 1.578                  | 1.501                                 | 1.303 | 0.936 | 0.668 | 92   | 81             | 51             | -3   | -31  | 1.03E-6       | 8.70E-6   | > 1.00E-4 |      |
| BT-549                                                                                   | 0.632 | 1.397 | 1.373                  | 1.362                                 | 1.371 | 0.796 | 0.622 | 97   | 95             | 97             | 21   | -2   | 4.16E-6       | 8.54E-5   | > 1.00E-4 |      |
| T-47D                                                                                    | 0.711 | 1.737 | 1.675                  | 1.587                                 | 1.532 | 0.792 | 0.582 | 94   | 85             | 80             | 8    | -18  | 2.61E-6       | 2.00E-5   | > 1.00E-4 |      |
| MDA-MB-468                                                                               | 0.501 | 0.837 | 0.815                  | 0.816                                 | 0.588 | 0.164 | 0.059 | 94   | 94             | 26             | -67  | -88  | 4.42E-7       | 1.90E-6   | 6.51E-6   |      |

2-(5'-Cyanopentyl)isoellipticinium bromide **19**

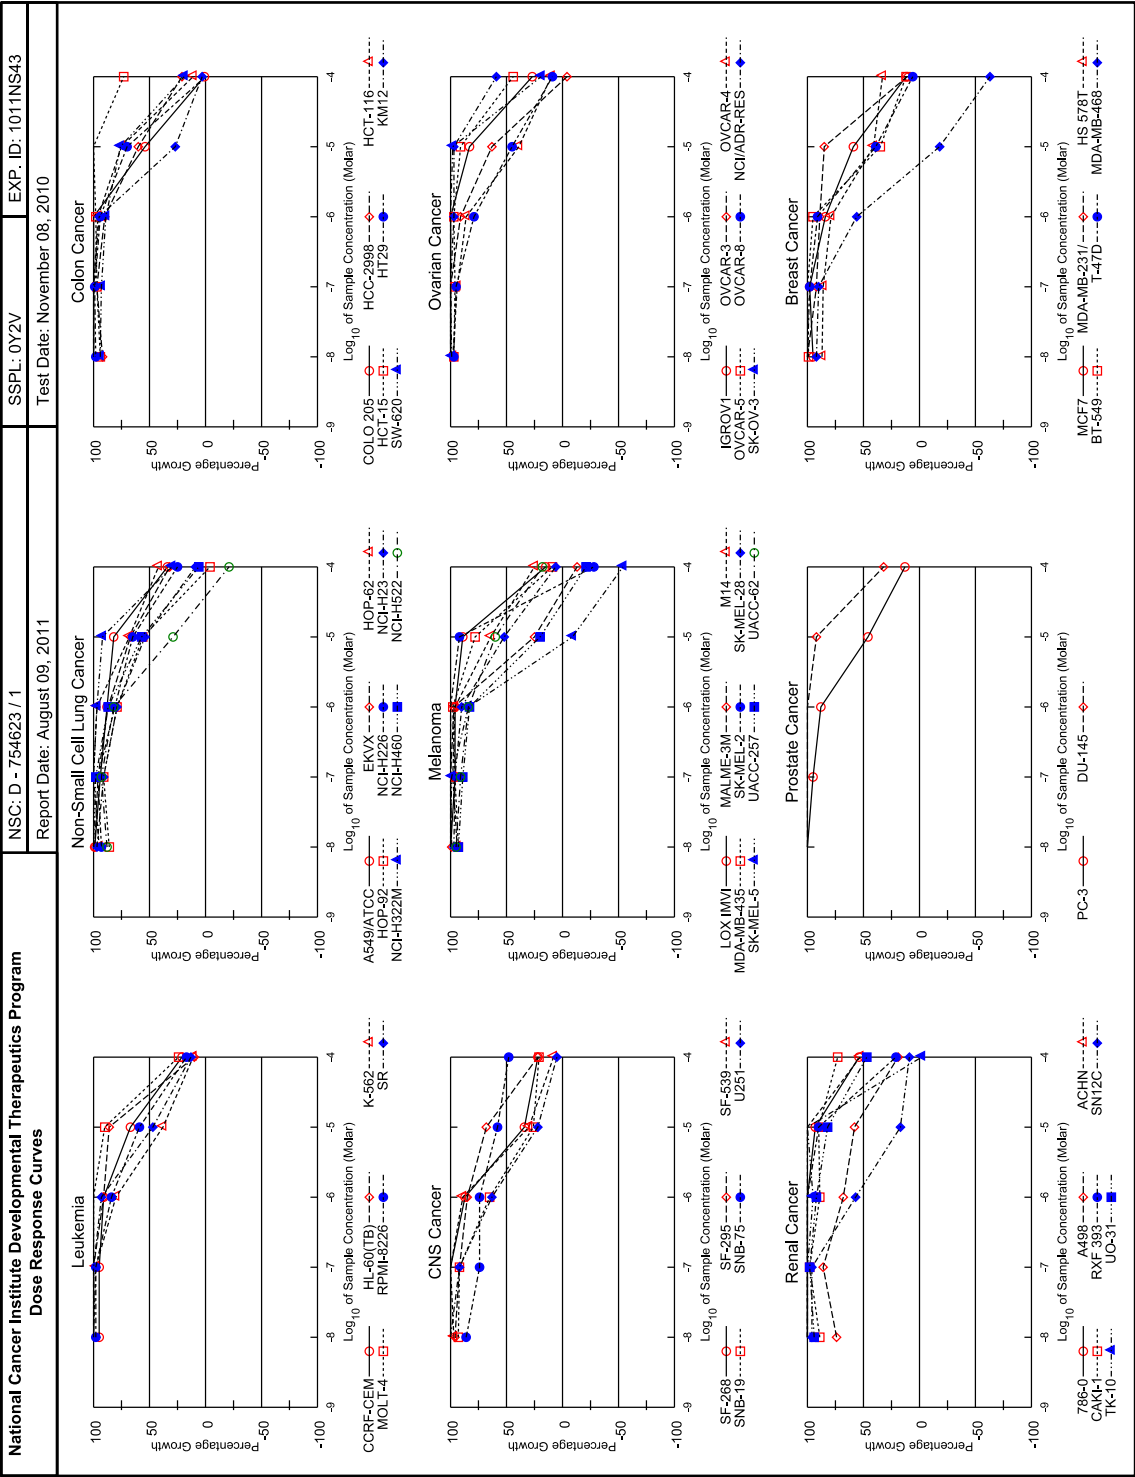



2-(5'-Cyanopentyl)isoellipticinium bromide **19**

| National Cancer Institute Developmental Therapeutics Program<br>In-Vitro Testing Results |           |       |                                       |       |       |       |       |      |                |      |      |               |           |           |           |
|------------------------------------------------------------------------------------------|-----------|-------|---------------------------------------|-------|-------|-------|-------|------|----------------|------|------|---------------|-----------|-----------|-----------|
| NSC : D - 754623 / 1                                                                     |           |       | Experiment ID : 1011NS43              |       |       |       |       |      | Test Type : 08 |      |      | Units : Molar |           |           |           |
| Report Date : August 09, 2011                                                            |           |       | Test Date : November 08, 2010         |       |       |       |       |      | QNS :          |      |      | MC :          |           |           |           |
| COMI : CM-4-177-1 (98581)                                                                |           |       | Stain Reagent : SRB Dual-Pass Related |       |       |       |       |      | SSPL : 0Y2V    |      |      |               |           |           |           |
| Log10 Concentration                                                                      |           |       |                                       |       |       |       |       |      |                |      |      |               |           |           |           |
| Panel/Cell Line                                                                          | Time Zero | Ctrl  | -8.0                                  | -7.0  | -6.0  | -5.0  | -4.0  | -8.0 | -7.0           | -6.0 | -5.0 | -4.0          | GI50      | TGI       | LC50      |
| Leukemia                                                                                 |           |       |                                       |       |       |       |       |      |                |      |      |               |           |           |           |
| CCRF-CEM                                                                                 | 0.564     | 2.509 | 2.404                                 | 2.418 | 2.336 | 1.864 | 0.981 | 95   | 95             | 91   | 67   | 21            | 2.35E-5   | > 1.00E-4 | > 1.00E-4 |
| HL-60(TB)                                                                                | 0.664     | 2.158 | 2.355                                 | 2.204 | 2.030 | 1.951 | 0.816 | 113  | 103            | 91   | 86   | 10            | 2.99E-5   | > 1.00E-4 | > 1.00E-4 |
| K-562                                                                                    | 0.166     | 1.170 | 1.177                                 | 1.145 | 0.972 | 0.544 | 0.276 | 101  | 98             | 80   | 38   | 11            | 5.14E-6   | > 1.00E-4 | > 1.00E-4 |
| MOLT-4                                                                                   | 0.546     | 2.028 | 2.031                                 | 2.077 | 2.154 | 1.879 | 0.909 | 100  | 103            | 109  | 90   | 24            | 4.08E-5   | > 1.00E-4 | > 1.00E-4 |
| RPMI-8226                                                                                | 1.152     | 2.925 | 2.891                                 | 2.896 | 2.643 | 2.193 | 1.461 | 98   | 98             | 84   | 59   | 17            | 1.62E-5   | > 1.00E-4 | > 1.00E-4 |
| SR                                                                                       | 0.382     | 1.828 | 1.847                                 | 1.827 | 1.727 | 1.058 | 0.564 | 101  | 100            | 93   | 47   | 13            | 8.49E-6   | > 1.00E-4 | > 1.00E-4 |
| Non-Small Cell Lung Cancer                                                               |           |       |                                       |       |       |       |       |      |                |      |      |               |           |           |           |
| A549/ATCC                                                                                | 0.317     | 1.410 | 1.399                                 | 1.345 | 1.284 | 1.209 | 0.688 | 99   | 94             | 88   | 82   | 34            | 4.60E-5   | > 1.00E-4 | > 1.00E-4 |
| EKVX                                                                                     | 0.655     | 1.692 | 1.679                                 | 1.650 | 1.560 | 1.355 | 0.989 | 99   | 96             | 87   | 67   | 32            | 3.13E-5   | > 1.00E-4 | > 1.00E-4 |
| HOP-62                                                                                   | 0.492     | 1.804 | 1.743                                 | 1.845 | 1.764 | 1.386 | 1.046 | 95   | 103            | 97   | 68   | 42            | 5.00E-5   | > 1.00E-4 | > 1.00E-4 |
| HOP-92                                                                                   | 0.992     | 1.431 | 1.368                                 | 1.392 | 1.340 | 1.239 | 0.953 | 86   | 91             | 79   | 56   | -4            | 1.27E-5   | 8.60E-5   | > 1.00E-4 |
| NCI-H226                                                                                 | 0.666     | 1.436 | 1.381                                 | 1.403 | 1.293 | 1.165 | 0.856 | 93   | 96             | 81   | 65   | 25            | 2.33E-5   | > 1.00E-4 | > 1.00E-4 |
| NCI-H23                                                                                  | 0.636     | 1.892 | 1.852                                 | 1.781 | 1.632 | 1.319 | 0.749 | 97   | 91             | 79   | 54   | 9             | 1.25E-5   | > 1.00E-4 | > 1.00E-4 |
| NCI-H322M                                                                                | 0.668     | 1.470 | 1.476                                 | 1.510 | 1.443 | 1.402 | 0.911 | 101  | 105            | 97   | 92   | 30            | 4.76E-5   | > 1.00E-4 | > 1.00E-4 |
| NCI-H460                                                                                 | 0.257     | 2.065 | 2.154                                 | 2.023 | 1.832 | 1.280 | 0.368 | 105  | 98             | 87   | 57   | 6             | 1.35E-5   | > 1.00E-4 | > 1.00E-4 |
| NCI-H522                                                                                 | 0.577     | 1.262 | 1.180                                 | 1.213 | 1.140 | 0.773 | 0.454 | 88   | 93             | 82   | 29   | -21           | 3.99E-6   | 3.73E-5   | > 1.00E-4 |
| Colon Cancer                                                                             |           |       |                                       |       |       |       |       |      |                |      |      |               |           |           |           |
| COLO 205                                                                                 | 0.282     | 1.164 | 1.202                                 | 1.269 | 1.174 | 0.760 | 0.291 | 104  | 112            | 101  | 54   | 1             | 1.20E-5   | > 1.00E-4 | > 1.00E-4 |
| HCC-2998                                                                                 | 0.511     | 2.129 | 2.000                                 | 2.079 | 1.959 | 1.477 | 0.845 | 92   | 97             | 90   | 60   | 21            | 1.77E-5   | > 1.00E-4 | > 1.00E-4 |
| HCT-116                                                                                  | 0.244     | 1.937 | 1.929                                 | 1.949 | 1.875 | 1.511 | 0.427 | 100  | 101            | 96   | 75   | 11            | 2.44E-5   | > 1.00E-4 | > 1.00E-4 |
| HCT-15                                                                                   | 0.247     | 1.561 | 1.485                                 | 1.526 | 1.535 | 1.610 | 1.206 | 94   | 97             | 98   | 104  | 73            | > 1.00E-4 | > 1.00E-4 | > 1.00E-4 |
| HT29                                                                                     | 0.205     | 1.040 | 1.027                                 | 1.036 | 0.993 | 0.787 | 0.205 | 98   | 99             | 94   | 70   | .             | 1.91E-5   | 9.92E-5   | > 1.00E-4 |
| KM12                                                                                     | 0.440     | 1.945 | 1.972                                 | 1.993 | 1.865 | 0.848 | 0.490 | 102  | 103            | 95   | 27   | 3             | 4.58E-6   | > 1.00E-4 | > 1.00E-4 |
| SW-620                                                                                   | 0.242     | 1.316 | 1.253                                 | 1.236 | 1.196 | 1.055 | 0.448 | 94   | 93             | 89   | 76   | 19            | 2.85E-5   | > 1.00E-4 | > 1.00E-4 |
| CNS Cancer                                                                               |           |       |                                       |       |       |       |       |      |                |      |      |               |           |           |           |
| SF-268                                                                                   | 0.360     | 1.180 | 1.215                                 | 1.223 | 1.074 | 0.637 | 0.542 | 104  | 105            | 87   | 34   | 22            | 4.95E-6   | > 1.00E-4 | > 1.00E-4 |
| SF-295                                                                                   | 0.799     | 2.734 | 2.648                                 | 2.570 | 2.448 | 2.120 | 1.222 | 96   | 92             | 85   | 68   | 22            | 2.47E-5   | > 1.00E-4 | > 1.00E-4 |
| SF-539                                                                                   | 0.654     | 1.781 | 1.749                                 | 1.798 | 1.657 | 0.998 | 0.750 | 97   | 101            | 89   | 30   | 8             | 4.64E-6   | > 1.00E-4 | > 1.00E-4 |
| SNB-19                                                                                   | 0.484     | 1.599 | 1.521                                 | 1.513 | 1.208 | 0.771 | 0.715 | 93   | 92             | 65   | 26   | 21            | 2.40E-6   | > 1.00E-4 | > 1.00E-4 |
| SNB-75                                                                                   | 0.760     | 1.461 | 1.361                                 | 1.280 | 1.280 | 1.166 | 1.095 | 86   | 74             | 74   | 58   | 48            | 5.98E-5   | > 1.00E-4 | > 1.00E-4 |
| U251                                                                                     | 0.337     | 1.281 | 1.288                                 | 1.201 | 0.930 | 0.543 | 0.386 | 101  | 92             | 63   | 22   | 5             | 2.05E-6   | > 1.00E-4 | > 1.00E-4 |
| Melanoma                                                                                 |           |       |                                       |       |       |       |       |      |                |      |      |               |           |           |           |
| LOX IMVI                                                                                 | 0.268     | 2.004 | 2.010                                 | 1.943 | 1.932 | 1.821 | 0.520 | 100  | 96             | 96   | 89   | 15            | 3.36E-5   | > 1.00E-4 | > 1.00E-4 |
| MALME-3M                                                                                 | 0.759     | 1.452 | 1.442                                 | 1.535 | 1.430 | 0.930 | 0.662 | 99   | 112            | 97   | 25   | -13           | 4.45E-6   | 4.55E-5   | > 1.00E-4 |
| M14                                                                                      | 0.350     | 1.357 | 1.300                                 | 1.333 | 1.317 | 0.999 | 0.599 | 94   | 98             | 96   | 64   | 25            | 2.31E-5   | > 1.00E-4 | > 1.00E-4 |
| MDA-MB-435                                                                               | 0.538     | 1.942 | 1.843                                 | 1.883 | 1.910 | 1.638 | 0.665 | 93   | 96             | 98   | 78   | 9             | 2.56E-5   | > 1.00E-4 | > 1.00E-4 |
| SK-MEL-2                                                                                 | 0.749     | 1.411 | 1.443                                 | 1.459 | 1.439 | 1.359 | 0.543 | 105  | 107            | 104  | 92   | -28           | 2.25E-5   | 5.89E-5   | > 1.00E-4 |
| SK-MEL-28                                                                                | 0.415     | 1.139 | 1.117                                 | 1.114 | 1.067 | 0.795 | 0.460 | 97   | 96             | 90   | 52   | 6             | 1.13E-5   | > 1.00E-4 | > 1.00E-4 |
| SK-MEL-5                                                                                 | 0.562     | 2.031 | 2.025                                 | 2.014 | 1.792 | 0.512 | 0.260 | 100  | 99             | 84   | -9   | -54           | 2.31E-6   | 8.00E-6   | 8.25E-5   |
| UACC-257                                                                                 | 0.792     | 1.517 | 1.464                                 | 1.436 | 1.394 | 0.936 | 0.628 | 93   | 89             | 83   | 20   | -21           | 3.34E-6   | 3.09E-5   | > 1.00E-4 |
| UACC-62                                                                                  | 0.729     | 2.494 | 2.409                                 | 2.341 | 2.218 | 1.783 | 1.039 | 95   | 91             | 84   | 60   | 18            | 1.70E-5   | > 1.00E-4 | > 1.00E-4 |
| Ovarian Cancer                                                                           |           |       |                                       |       |       |       |       |      |                |      |      |               |           |           |           |
| IGROV1                                                                                   | 0.429     | 1.621 | 1.723                                 | 1.765 | 1.643 | 1.417 | 0.746 | 109  | 112            | 102  | 83   | 27            | 3.84E-5   | > 1.00E-4 | > 1.00E-4 |
| OVCAR-3                                                                                  | 0.335     | 0.882 | 0.892                                 | 0.904 | 0.834 | 0.681 | 0.322 | 102  | 104            | 91   | 63   | -4            | 1.57E-5   | 8.75E-5   | > 1.00E-4 |
| OVCAR-4                                                                                  | 0.592     | 1.402 | 1.385                                 | 1.356 | 1.289 | 0.908 | 0.670 | 98   | 94             | 86   | 39   | 10            | 5.83E-6   | > 1.00E-4 | > 1.00E-4 |
| OVCAR-5                                                                                  | 0.463     | 1.038 | 1.020                                 | 1.014 | 1.021 | 0.984 | 0.717 | 97   | 96             | 97   | 91   | 44            | 7.45E-5   | > 1.00E-4 | > 1.00E-4 |
| OVCAR-8                                                                                  | 0.399     | 1.407 | 1.381                                 | 1.356 | 1.197 | 0.851 | 0.485 | 97   | 95             | 79   | 45   | 9             | 7.05E-6   | > 1.00E-4 | > 1.00E-4 |
| NCI/ADR-RES                                                                              | 0.525     | 1.769 | 1.829                                 | 1.766 | 1.727 | 1.730 | 1.262 | 105  | 100            | 97   | 97   | 59            | > 1.00E-4 | > 1.00E-4 | > 1.00E-4 |
| SK-OV-3                                                                                  | 0.714     | 1.709 | 1.870                                 | 1.741 | 1.733 | 1.693 | 0.907 | 99   | 103            | 102  | 98   | 19            | 4.10E-5   | > 1.00E-4 | > 1.00E-4 |
| Renal Cancer                                                                             |           |       |                                       |       |       |       |       |      |                |      |      |               |           |           |           |
| 786-0                                                                                    | 0.700     | 2.362 | 2.390                                 | 2.422 | 2.368 | 2.239 | 1.600 | 102  | 104            | 100  | 93   | 54            | > 1.00E-4 | > 1.00E-4 | > 1.00E-4 |
| A498                                                                                     | 1.273     | 1.924 | 1.753                                 | 1.832 | 1.717 | 1.654 | 1.395 | 74   | 86             | 68   | 58   | 19            | 1.64E-5   | > 1.00E-4 | > 1.00E-4 |
| ACHN                                                                                     | 0.366     | 1.437 | 1.446                                 | 1.446 | 1.457 | 1.440 | 0.935 | 101  | 101            | 102  | 100  | 53            | > 1.00E-4 | > 1.00E-4 | > 1.00E-4 |
| CAKI-1                                                                                   | 0.584     | 2.095 | 1.933                                 | 2.061 | 1.932 | 1.947 | 1.686 | 89   | 98             | 89   | 90   | 73            | > 1.00E-4 | > 1.00E-4 | > 1.00E-4 |
| RXF 393                                                                                  | 0.656     | 1.076 | 1.098                                 | 1.102 | 1.098 | 1.032 | 0.744 | 105  | 106            | 105  | 90   | 21            | 3.77E-5   | > 1.00E-4 | > 1.00E-4 |
| SN12C                                                                                    | 0.524     | 1.857 | 1.799                                 | 1.798 | 1.285 | 0.747 | 0.649 | 96   | 96             | 57   | 17   | 9             | 1.50E-6   | > 1.00E-4 | > 1.00E-4 |
| TK-10                                                                                    | 0.588     | 1.085 | 1.088                                 | 1.084 | 1.059 | 1.084 | 0.575 | 100  | 100            | 95   | 100  | -2            | 3.07E-5   | 9.49E-5   | > 1.00E-4 |
| UO-31                                                                                    | 0.580     | 1.623 | 1.559                                 | 1.603 | 1.538 | 1.436 | 1.075 | 94   | 98             | 92   | 82   | 47            | 8.44E-5   | > 1.00E-4 | > 1.00E-4 |
| Prostate Cancer                                                                          |           |       |                                       |       |       |       |       |      |                |      |      |               |           |           |           |
| PC-3                                                                                     | 0.561     | 2.032 | 2.034                                 | 1.965 | 1.858 | 1.238 | 0.757 | 100  | 95             | 88   | 46   | 13            | 8.03E-6   | > 1.00E-4 | > 1.00E-4 |
| DU-145                                                                                   | 0.276     | 1.022 | 1.060                                 | 1.070 | 1.069 | 0.964 | 0.515 | 105  | 106            | 106  | 92   | 32            | 5.01E-5   | > 1.00E-4 | > 1.00E-4 |
| Breast Cancer                                                                            |           |       |                                       |       |       |       |       |      |                |      |      |               |           |           |           |
| MCF7                                                                                     | 0.402     | 1.730 | 1.658                                 | 1.706 | 1.524 | 1.186 | 0.557 | 95   | 98             | 84   | 59   | 12            | 1.55E-5   | > 1.00E-4 | > 1.00E-4 |
| MDA-MB-231/ATCC                                                                          | 0.461     | 1.119 | 1.130                                 | 1.064 | 1.050 | 1.019 | 0.536 | 102  | 92             | 89   | 85   | 11            | 2.97E-5   | > 1.00E-4 | > 1.00E-4 |
| HS 578T                                                                                  | 0.967     | 1.628 | 1.543                                 | 1.535 | 1.489 | 1.241 | 1.188 | 87   | 86             | 79   | 41   | 33            | 5.90E-6   | > 1.00E-4 | > 1.00E-4 |
| BT-549                                                                                   | 0.632     | 1.397 | 1.389                                 | 1.396 | 1.363 | 0.899 | 0.726 | 99   | 100            | 95   | 35   | 12            | 5.63E-6   | > 1.00E-4 | > 1.00E-4 |
| T-47D                                                                                    | 0.711     | 1.737 | 1.743                                 | 1.718 | 1.649 | 1.106 | 0.774 | 101  | 98             | 91   | 39   | 6             | 6.07E-6   | > 1.00E-4 | > 1.00E-4 |
| MDA-MB-468                                                                               | 0.501     | 0.837 | 0.809                                 | 0.803 | 0.691 | 0.412 | 0.186 | 92   | 90             | 56   | -18  | -63           | 1.22E-6   | 5.75E-6   | 5.16E-5   |



## 6. Topoisomerase II assay gels

### A-ring substituted ellipticines and analogues

μM: 100 10 1 100 10 1 100 10 1 100 10 1 100 10 1 100 10 1  
A B 1 2 3 4 5 6 7 8 9 10 11 12 13 14 15 16 17 18

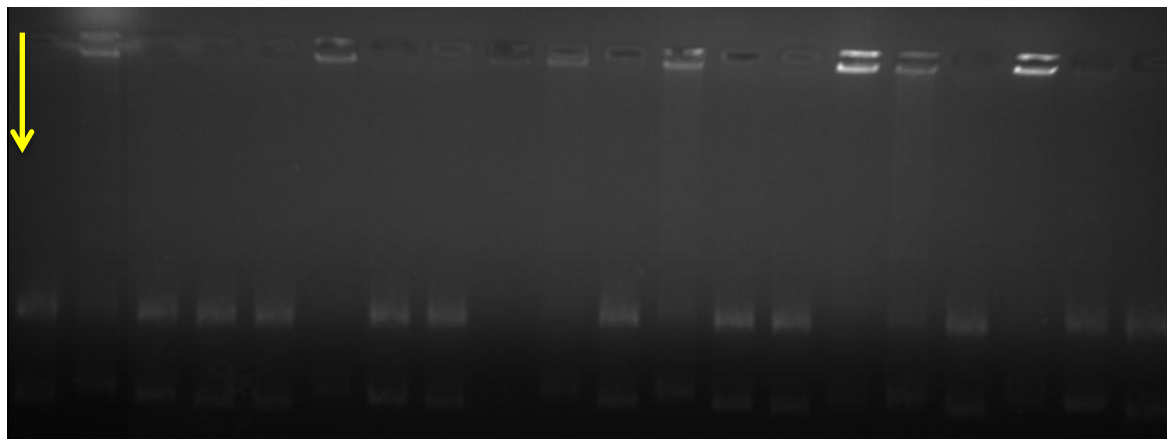

| Lane     | 1 | 2 | 3 | 4 | 5 | 6 | 7 | 8 | 9 | 10 | 11 | 12 | 13 | 14 | 15 | 16 | 17 | 18 |
|----------|---|---|---|---|---|---|---|---|---|----|----|----|----|----|----|----|----|----|
| No.      | 9 | 9 | 9 | 7 | 7 | 7 | 4 | 4 | 4 |    |    |    | 6  | 6  | 6  | 15 | 15 | 15 |
| Activity | - | - | - | + | - | - | + | + | - |    |    |    | +  | +  | -  | +  | -  | -  |

Figure 1

A, positive control = kDNA +ATP + Topo II; B, negative control = kDNA +ATP + Topo II + 100 μM ellipticine  
C = dilution solvent / blank. Inhibitory activity: (-) = not active against topo II; (+) = topo II inhibition.

### Isollipticinium salts – 100 μM

A B 1 2 3 4 5 6 7 8 9 10 11 12 13 14 15 16

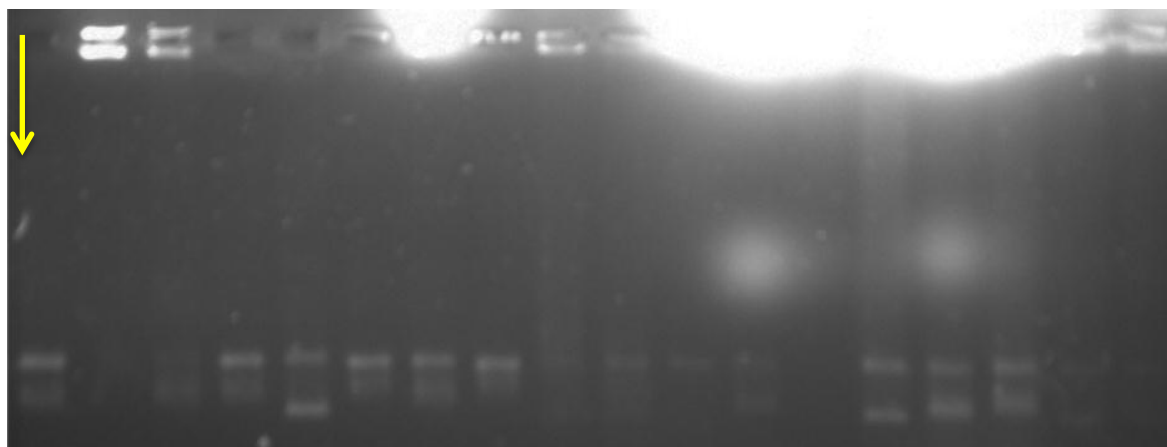

| Lane     | 1 | 2 | 3  | 4 | 5  | 6 | 7  | 8  | 9  | 10 | 11 | 12 | 13 | 14 | 15 | 16 |
|----------|---|---|----|---|----|---|----|----|----|----|----|----|----|----|----|----|
| No.      | 6 | C | 16 | C | 20 | C | 19 | 21 | 22 | 23 | 24 | 25 | 26 | 27 | 28 | 29 |
| Activity | + | - | -  | - | -  | - | +  | +  | +  | -  | +  | -  | -  | -  | +  | +  |

Figure 2

Note: 7-Hydroxy-*N*<sup>2</sup>-(6'-methylsulfonamido-6-oxohexyl)isoellipticinium bromide **30** was tested in a separate gel with unrelated compounds and displayed no inhibition of topo II.

Isoellipticinium salts – 3-fold dilution

μM:            100   10   1   100   10   1   100   10   1   100   10   1   100   10   1  
A    B    1    2    3    4    5    6    7    8    9    10   11   12   13   14   15

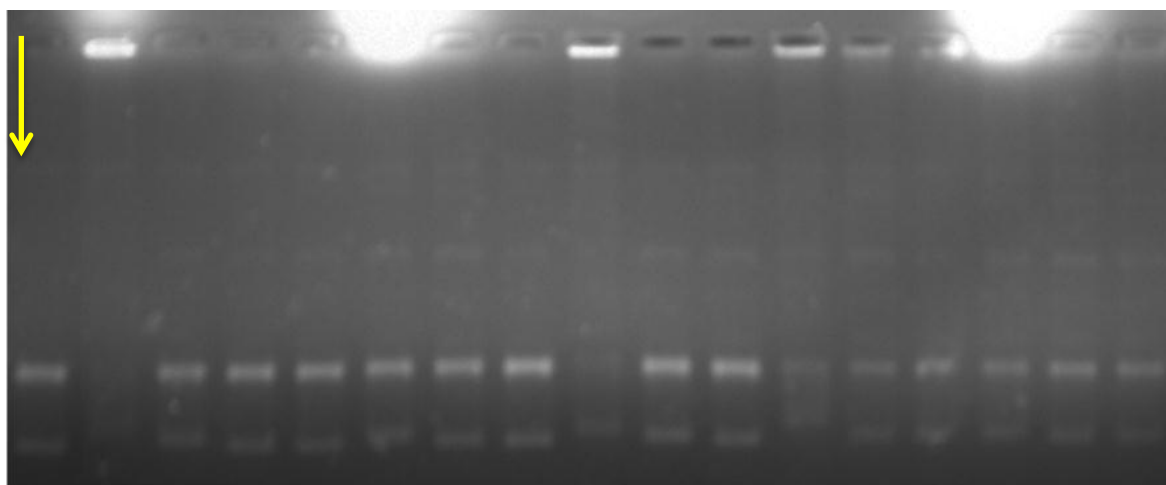

| Lane     | 1 | 2 | 3 | 4  | 5  | 6  | 7  | 8  | 9  | 10 | 11 | 12 | 13 | 14 | 15 |
|----------|---|---|---|----|----|----|----|----|----|----|----|----|----|----|----|
| No.      | 5 | 5 | 5 | 20 | 20 | 20 | 19 | 19 | 19 | 21 | 21 | 21 | 22 | 22 | 22 |
| Activity | - | - | - | -  | -  | -  | +  | -  | -  | +  | +  | -  | -  | -  | -  |

Figure 3

7-Formyl and 7-Hydroxy Isoellipticinium salts – 3-fold dilution

μM:            100   10   1   100   10   1   100   10   1   100   10   1   100   10   1  
A    B    1    2    3    4    5    6    7    8    9    10   11   12   13   14   15

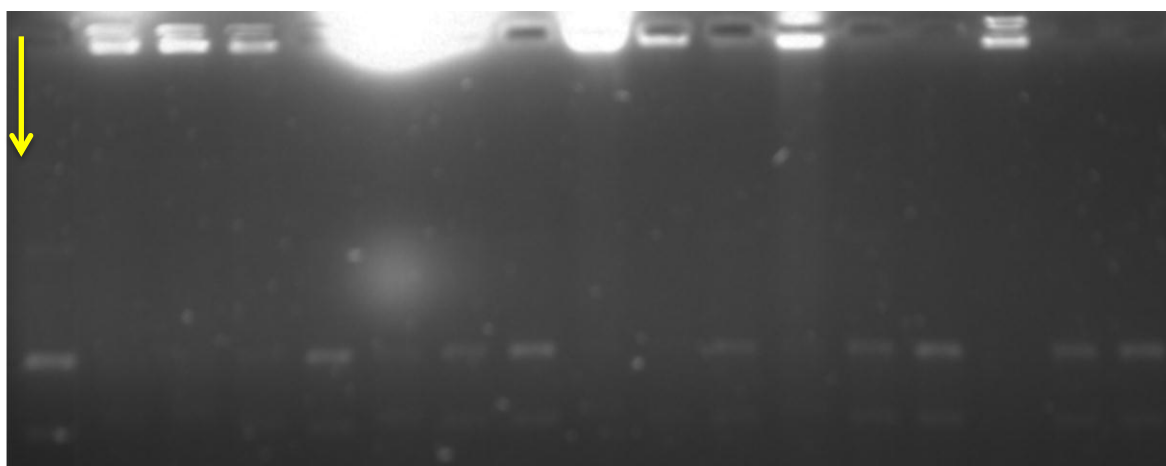

| Lane     | 1 | 2 | 3 | 4  | 5  | 6  | 7  | 8  | 9  | 10 | 11 | 12 | 13 | 14 | 15 |
|----------|---|---|---|----|----|----|----|----|----|----|----|----|----|----|----|
| No.      | 6 | 6 | 6 | 23 | 23 | 23 | 24 | 24 | 24 | 28 | 28 | 28 | 29 | 29 | 29 |
| Activity | + | + | - | +  | -  | -  | +  | +  | -  | +  | -  | -  | +  | -  | -  |

Figure 4
